# Supplementary material for: RNA profiling identifies novel, photoperiod-history dependent markers associated with enhanced saltwater performance in juvenile Atlantic salmon
Source: PubMed Central journal article supplement (PMC7141700; doi:10.1371/journal.pone.0227496), 2020-04-08
Supplement: pone.0227496.s002.pdf [file pone.0227496.s002.pdf]

| 2way ANOVA<br>Tabular results |                          |                      |         |                 |                   |          |
|-------------------------------|--------------------------|----------------------|---------|-----------------|-------------------|----------|
| 1                             | Table Analyzed           | Osmolality 2013      |         |                 |                   |          |
| 2                             |                          |                      |         |                 |                   |          |
| 3                             | Two-way ANOVA            | Ordinary             |         |                 |                   |          |
| 4                             | Alpha                    | 0.05                 |         |                 |                   |          |
| 5                             |                          |                      |         |                 |                   |          |
| 6                             | Source of Variation      | % of total variation | P value | P value summary | Significant?      |          |
| 7                             | Interaction              | 19.58                | <0.0001 | ****            | Yes               |          |
| 8                             | Time                     | 29.14                | <0.0001 | ****            | Yes               |          |
| 9                             | Treatment                | 35.89                | <0.0001 | ****            | Yes               |          |
| 10                            |                          |                      |         |                 |                   |          |
| 11                            | ANOVA table              | SS (Type III)        | DF      | MS              | F (DFn, DFd)      | P value  |
| 12                            | Interaction              | 11380                | 4       | 2845            | F (4, 44) = 14.89 | P<0.0001 |
| 13                            | Time                     | 16933                | 2       | 8466            | F (2, 44) = 44.31 | P<0.0001 |
| 14                            | Treatment                | 20858                | 2       | 10429           | F (2, 44) = 54.58 | P<0.0001 |
| 15                            | Residual                 | 8407                 | 44      | 191.1           |                   |          |
| 16                            |                          |                      |         |                 |                   |          |
| 17                            | Number of missing values | 1                    |         |                 |                   |          |

| 2way ANOVA<br>Multiple comparisons |                                                               |            |                    |              |             |                  |    |       |    |
|------------------------------------|---------------------------------------------------------------|------------|--------------------|--------------|-------------|------------------|----|-------|----|
| 1                                  | Within each row, compare columns (simple effects within rows) |            |                    |              |             |                  |    |       |    |
| 2                                  |                                                               |            |                    |              |             |                  |    |       |    |
| 3                                  | Number of families                                            | 3          |                    |              |             |                  |    |       |    |
| 4                                  | Number of comparisons per family                              | 3          |                    |              |             |                  |    |       |    |
| 5                                  | Alpha                                                         | 0.05       |                    |              |             |                  |    |       |    |
| 6                                  |                                                               |            |                    |              |             |                  |    |       |    |
| 7                                  | Tukey's multiple comparisons test                             | Mean Diff. | 95.00% CI of diff. | Significant? | Summary     | Adjusted P Value |    |       |    |
| 8                                  |                                                               |            |                    |              |             |                  |    |       |    |
| 9                                  | 68                                                            |            |                    |              |             |                  |    |       |    |
| 10                                 | LL vs. SP                                                     | -73        | -92.36 to -53.64   | Yes          | ****        | <0.0001          |    |       |    |
| 11                                 | LL vs. SPLL                                                   | -62.67     | -82.02 to -43.31   | Yes          | ****        | <0.0001          |    |       |    |
| 12                                 | SP vs. SPLL                                                   | 10.33      | -9.023 to 29.69    | No           | ns          | 0.4056           |    |       |    |
| 13                                 |                                                               |            |                    |              |             |                  |    |       |    |
| 14                                 | 89                                                            |            |                    |              |             |                  |    |       |    |
| 15                                 | LL vs. SP                                                     | -32.9      | -53.2 to -12.6     | Yes          | ***         | 0.0008           |    |       |    |
| 16                                 | LL vs. SPLL                                                   | 10.5       | -8.857 to 29.86    | No           | ns          | 0.3942           |    |       |    |
| 17                                 | SP vs. SPLL                                                   | 43.4       | 23.1 to 63.7       | Yes          | ****        | <0.0001          |    |       |    |
| 18                                 |                                                               |            |                    |              |             |                  |    |       |    |
| 19                                 | 110                                                           |            |                    |              |             |                  |    |       |    |
| 20                                 | LL vs. SP                                                     | -36.33     | -55.69 to -16.98   | Yes          | ***         | 0.0001           |    |       |    |
| 21                                 | LL vs. SPLL                                                   | 14.5       | -4.857 to 33.86    | No           | ns          | 0.1759           |    |       |    |
| 22                                 | SP vs. SPLL                                                   | 50.83      | 31.48 to 70.19     | Yes          | ****        | <0.0001          |    |       |    |
| 23                                 |                                                               |            |                    |              |             |                  |    |       |    |
| 24                                 |                                                               |            |                    |              |             |                  |    |       |    |
| 25                                 | Test details                                                  | Mean 1     | Mean 2             | Mean Diff.   | SE of diff. | N1               | N2 | q     | DF |
| 26                                 |                                                               |            |                    |              |             |                  |    |       |    |
| 27                                 | 68                                                            |            |                    |              |             |                  |    |       |    |
| 28                                 | LL vs. SP                                                     | 347        | 420                | -73          | 7.981       | 6                | 6  | 12.94 | 44 |
| 29                                 | LL vs. SPLL                                                   | 347        | 409.7              | -62.67       | 7.981       | 6                | 6  | 11.1  | 44 |
| 30                                 | SP vs. SPLL                                                   | 420        | 409.7              | 10.33        | 7.981       | 6                | 6  | 1.831 | 44 |

| 2way ANOVA<br>Multiple comparisons |             |       |       |        |       |   |   |       |    |
|------------------------------------|-------------|-------|-------|--------|-------|---|---|-------|----|
| <b>31</b>                          |             |       |       |        |       |   |   |       |    |
| <b>32</b>                          | 89          |       |       |        |       |   |   |       |    |
| <b>33</b>                          | LL vs. SP   | 354.5 | 387.4 | -32.9  | 8.37  | 6 | 5 | 5.559 | 44 |
| <b>34</b>                          | LL vs. SPLL | 354.5 | 344   | 10.5   | 7.981 | 6 | 6 | 1.861 | 44 |
| <b>35</b>                          | SP vs. SPLL | 387.4 | 344   | 43.4   | 8.37  | 5 | 6 | 7.333 | 44 |
| <b>36</b>                          |             |       |       |        |       |   |   |       |    |
| <b>37</b>                          | 110         |       |       |        |       |   |   |       |    |
| <b>38</b>                          | LL vs. SP   | 342.8 | 379.2 | -36.33 | 7.981 | 6 | 6 | 6.439 | 44 |
| <b>39</b>                          | LL vs. SPLL | 342.8 | 328.3 | 14.5   | 7.981 | 6 | 6 | 2.569 | 44 |
| <b>40</b>                          | SP vs. SPLL | 379.2 | 328.3 | 50.83  | 7.981 | 6 | 6 | 9.008 | 44 |
