# Supplementary material for: RNA profiling identifies novel, photoperiod-history dependent markers associated with enhanced saltwater performance in juvenile Atlantic salmon
Source: PubMed Central journal article supplement (PMC7141700; doi:10.1371/journal.pone.0227496), 2020-04-08
Supplement: pone.0227496.s003.pdf [file pone.0227496.s003.pdf]

| 2way ANOVA<br>Tabular results |                          |                      |         |                 |                    |          |
|-------------------------------|--------------------------|----------------------|---------|-----------------|--------------------|----------|
| 1                             | Table Analyzed           | Osmolality 2-ANOVA   |         |                 |                    |          |
| 2                             |                          |                      |         |                 |                    |          |
| 3                             | Two-way ANOVA            | Ordinary             |         |                 |                    |          |
| 4                             | Alpha                    | 0.05                 |         |                 |                    |          |
| 5                             |                          |                      |         |                 |                    |          |
| 6                             | Source of Variation      | % of total variation | P value | P value summary | Significant?       |          |
| 7                             | Interaction              | 13.08                | <0.0001 | ****            | Yes                |          |
| 8                             | Treatment                | 61.28                | <0.0001 | ****            | Yes                |          |
| 9                             | Pretreatment             | 4.933                | <0.0001 | ****            | Yes                |          |
| 10                            |                          |                      |         |                 |                    |          |
| 11                            | ANOVA table              | SS (Type III)        | DF      | MS              | F (DFn, DFd)       | P value  |
| 12                            | Interaction              | 31215                | 8       | 3902            | F (8, 131) = 9.62  | P<0.0001 |
| 13                            | Treatment                | 146229               | 4       | 36557           | F (4, 131) = 90.13 | P<0.0001 |
| 14                            | Pretreatment             | 11772                | 2       | 5886            | F (2, 131) = 14.51 | P<0.0001 |
| 15                            | Residual                 | 53137                | 131     | 405.6           |                    |          |
| 16                            |                          |                      |         |                 |                    |          |
| 17                            | Number of missing values | 4                    |         |                 |                    |          |

| 2way ANOVA<br>Multiple comparisons |                                                                 |            |                    |              |         |                  |
|------------------------------------|-----------------------------------------------------------------|------------|--------------------|--------------|---------|------------------|
| 1                                  | Compare cell means regardless of rows and columns               |            |                    |              |         |                  |
| 2                                  |                                                                 |            |                    |              |         |                  |
| 3                                  | Number of families                                              | 1          |                    |              |         |                  |
| 4                                  | Number of comparisons per family                                | 105        |                    |              |         |                  |
| 5                                  | Alpha                                                           | 0.05       |                    |              |         |                  |
| 6                                  |                                                                 |            |                    |              |         |                  |
| 7                                  | Tukey's multiple comparisons test                               | Mean Diff. | 95.00% CI of diff. | Significant? | Summary | Adjusted P Value |
| 8                                  |                                                                 |            |                    |              |         |                  |
| 9                                  | Last day SP:2 week winter vs. Last day SP:4 week winter         | -5.25      | -36.39 to 25.89    | No           | ns      | >0.9999          |
| 10                                 | Last day SP:2 week winter vs. Last day SP:8 week winter         | -8.15      | -39.29 to 22.99    | No           | ns      | 0.9999           |
| 11                                 | Last day SP:2 week winter vs. 4 weeks post winter:2 week winter | 58.03      | 26.04 to 90.02     | Yes          | ****    | <0.0001          |
| 12                                 | Last day SP:2 week winter vs. 4 weeks post winter:4 week winter | 40.02      | 8.878 to 71.16     | Yes          | **      | 0.0017           |
| 13                                 | Last day SP:2 week winter vs. 4 weeks post winter:8 week winter | 42.1       | 10.96 to 73.24     | Yes          | ***     | 0.0007           |
| 14                                 | Last day SP:2 week winter vs. 8 weeks post winter:2 week winter | 65.28      | 33.29 to 97.27     | Yes          | ****    | <0.0001          |
| 15                                 | Last day SP:2 week winter vs. 8 weeks post winter:4 week winter | 62.18      | 31.04 to 93.31     | Yes          | ****    | <0.0001          |
| 16                                 | Last day SP:2 week winter vs. 8 weeks post winter:8 week winter | 65.55      | 34.41 to 96.69     | Yes          | ****    | <0.0001          |
| 17                                 | Last day SP:2 week winter vs. SPC -4 weeks post:2 week winter   | -11.64     | -43.63 to 20.35    | No           | ns      | 0.9950           |
| 18                                 | Last day SP:2 week winter vs. SPC -4 weeks post:4 week winter   | -64.42     | -96.41 to -32.42   | Yes          | ****    | <0.0001          |
| 19                                 | Last day SP:2 week winter vs. SPC -4 weeks post:8 week winter   | 9.4        | -21.74 to 40.54    | No           | ns      | 0.9993           |
| 20                                 | Last day SP:2 week winter vs. SPC -8 weeks post:2 week winter   | -8.5       | -39.64 to 22.64    | No           | ns      | 0.9998           |
| 21                                 | Last day SP:2 week winter vs. SPC -8 weeks post:4 week winter   | 9.4        | -21.74 to 40.54    | No           | ns      | 0.9993           |
| 22                                 | Last day SP:2 week winter vs. SPC -8 weeks post:8 week winter   | 41.9       | 10.76 to 73.04     | Yes          | ***     | 0.0007           |
| 23                                 | Last day SP:4 week winter vs. Last day SP:8 week winter         | -2.9       | -34.04 to 28.24    | No           | ns      | >0.9999          |
| 24                                 | Last day SP:4 week winter vs. 4 weeks post winter:2 week winter | 63.28      | 31.29 to 95.27     | Yes          | ****    | <0.0001          |
| 25                                 | Last day SP:4 week winter vs. 4 weeks post winter:4 week winter | 45.27      | 14.13 to 76.41     | Yes          | ***     | 0.0002           |
| 26                                 | Last day SP:4 week winter vs. 4 weeks post winter:8 week winter | 47.35      | 16.21 to 78.49     | Yes          | ****    | <0.0001          |
| 27                                 | Last day SP:4 week winter vs. 8 weeks post winter:2 week winter | 70.53      | 38.54 to 102.5     | Yes          | ****    | <0.0001          |
| 28                                 | Last day SP:4 week winter vs. 8 weeks post winter:4 week winter | 67.43      | 36.29 to 98.56     | Yes          | ****    | <0.0001          |
| 29                                 | Last day SP:4 week winter vs. 8 weeks post winter:8 week winter | 70.8       | 39.66 to 101.9     | Yes          | ****    | <0.0001          |
| 30                                 | Last day SP:4 week winter vs. SPC -4 weeks post:2 week winter   | -6.389     | -38.38 to 25.6     | No           | ns      | >0.9999          |

| 2way ANOVA<br>Multiple comparisons |                                                                         |        |                  |     |      |         |  |
|------------------------------------|-------------------------------------------------------------------------|--------|------------------|-----|------|---------|--|
| 31                                 | Last day SP:4 week winter vs. SPC -4 weeks post:4 week winter           | -59.17 | -91.16 to -27.17 | Yes | **** | <0.0001 |  |
| 32                                 | Last day SP:4 week winter vs. SPC -4 weeks post:8 week winter           | 14.65  | -16.49 to 45.79  | No  | ns   | 0.9497  |  |
| 33                                 | Last day SP:4 week winter vs. SPC -8 weeks post:2 week winter           | -3.25  | -34.39 to 27.89  | No  | ns   | >0.9999 |  |
| 34                                 | Last day SP:4 week winter vs. SPC -8 weeks post:4 week winter           | 14.65  | -16.49 to 45.79  | No  | ns   | 0.9497  |  |
| 35                                 | Last day SP:4 week winter vs. SPC -8 weeks post:8 week winter           | 47.15  | 16.01 to 78.29   | Yes | **** | <0.0001 |  |
| 36                                 | Last day SP:8 week winter vs. 4 weeks post winter:2 week winter         | 66.18  | 34.19 to 98.17   | Yes | **** | <0.0001 |  |
| 37                                 | Last day SP:8 week winter vs. 4 weeks post winter:4 week winter         | 48.17  | 17.03 to 79.31   | Yes | **** | <0.0001 |  |
| 38                                 | Last day SP:8 week winter vs. 4 weeks post winter:8 week winter         | 50.25  | 19.11 to 81.39   | Yes | **** | <0.0001 |  |
| 39                                 | Last day SP:8 week winter vs. 8 weeks post winter:2 week winter         | 73.43  | 41.44 to 105.4   | Yes | **** | <0.0001 |  |
| 40                                 | Last day SP:8 week winter vs. 8 weeks post winter:4 week winter         | 70.33  | 39.19 to 101.5   | Yes | **** | <0.0001 |  |
| 41                                 | Last day SP:8 week winter vs. 8 weeks post winter:8 week winter         | 73.7   | 42.56 to 104.8   | Yes | **** | <0.0001 |  |
| 42                                 | Last day SP:8 week winter vs. SPC -4 weeks post:2 week winter           | -3.489 | -35.48 to 28.5   | No  | ns   | >0.9999 |  |
| 43                                 | Last day SP:8 week winter vs. SPC -4 weeks post:4 week winter           | -56.27 | -88.26 to -24.27 | Yes | **** | <0.0001 |  |
| 44                                 | Last day SP:8 week winter vs. SPC -4 weeks post:8 week winter           | 17.55  | -13.59 to 48.69  | No  | ns   | 0.8237  |  |
| 45                                 | Last day SP:8 week winter vs. SPC -8 weeks post:2 week winter           | -0.35  | -31.49 to 30.79  | No  | ns   | >0.9999 |  |
| 46                                 | Last day SP:8 week winter vs. SPC -8 weeks post:4 week winter           | 17.55  | -13.59 to 48.69  | No  | ns   | 0.8237  |  |
| 47                                 | Last day SP:8 week winter vs. SPC -8 weeks post:8 week winter           | 50.05  | 18.91 to 81.19   | Yes | **** | <0.0001 |  |
| 48                                 | 4 weeks post winter:2 week winter vs. 4 weeks post winter:4 week winter | -18.01 | -50 to 13.98     | No  | ns   | 0.8248  |  |
| 49                                 | 4 weeks post winter:2 week winter vs. 4 weeks post winter:8 week winter | -15.93 | -47.92 to 16.06  | No  | ns   | 0.9227  |  |
| 50                                 | 4 weeks post winter:2 week winter vs. 8 weeks post winter:2 week winter | 7.25   | -25.57 to 40.07  | No  | ns   | >0.9999 |  |
| 51                                 | 4 weeks post winter:2 week winter vs. 8 weeks post winter:4 week winter | 4.147  | -27.85 to 36.14  | No  | ns   | >0.9999 |  |
| 52                                 | 4 weeks post winter:2 week winter vs. 8 weeks post winter:8 week winter | 7.522  | -24.47 to 39.51  | No  | ns   | >0.9999 |  |
| 53                                 | 4 weeks post winter:2 week winter vs. SPC -4 weeks post:2 week winter   | -69.67 | -102.5 to -36.84 | Yes | **** | <0.0001 |  |
| 54                                 | 4 weeks post winter:2 week winter vs. SPC -4 weeks post:4 week winter   | -122.4 | -155.3 to -89.62 | Yes | **** | <0.0001 |  |
| 55                                 | 4 weeks post winter:2 week winter vs. SPC -4 weeks post:8 week winter   | -48.63 | -80.62 to -16.64 | Yes | **** | <0.0001 |  |
| 56                                 | 4 weeks post winter:2 week winter vs. SPC -8 weeks post:2 week winter   | -66.53 | -98.52 to -34.54 | Yes | **** | <0.0001 |  |
| 57                                 | 4 weeks post winter:2 week winter vs. SPC -8 weeks post:4 week winter   | -48.63 | -80.62 to -16.64 | Yes | **** | <0.0001 |  |
| 58                                 | 4 weeks post winter:2 week winter vs. SPC -8 weeks post:8 week winter   | -16.13 | -48.12 to 15.86  | No  | ns   | 0.9154  |  |
| 59                                 | 4 weeks post winter:4 week winter vs. 4 weeks post winter:8 week winter | 2.083  | -29.06 to 33.22  | No  | ns   | >0.9999 |  |
| 60                                 | 4 weeks post winter:4 week winter vs. 8 weeks post winter:2 week winter | 25.26  | -6.731 to 57.25  | No  | ns   | 0.2993  |  |

| 2way ANOVA<br>Multiple comparisons |                                                                         |        |                  |     |      |         |  |
|------------------------------------|-------------------------------------------------------------------------|--------|------------------|-----|------|---------|--|
| 61                                 | 4 weeks post winter:4 week winter vs. 8 weeks post winter:4 week winter | 22.16  | -8.981 to 53.3   | No  | ns   | 0.4761  |  |
| 62                                 | 4 weeks post winter:4 week winter vs. 8 weeks post winter:8 week winter | 25.53  | -5.606 to 56.67  | No  | ns   | 0.2420  |  |
| 63                                 | 4 weeks post winter:4 week winter vs. SPC -4 weeks post:2 week winter   | -51.66 | -83.65 to -19.66 | Yes | **** | <0.0001 |  |
| 64                                 | 4 weeks post winter:4 week winter vs. SPC -4 weeks post:4 week winter   | -104.4 | -136.4 to -72.44 | Yes | **** | <0.0001 |  |
| 65                                 | 4 weeks post winter:4 week winter vs. SPC -4 weeks post:8 week winter   | -30.62 | -61.76 to 0.5224 | No  | ns   | 0.0591  |  |
| 66                                 | 4 weeks post winter:4 week winter vs. SPC -8 weeks post:2 week winter   | -48.52 | -79.66 to -17.38 | Yes | **** | <0.0001 |  |
| 67                                 | 4 weeks post winter:4 week winter vs. SPC -8 weeks post:4 week winter   | -30.62 | -61.76 to 0.5224 | No  | ns   | 0.0591  |  |
| 68                                 | 4 weeks post winter:4 week winter vs. SPC -8 weeks post:8 week winter   | 1.883  | -29.26 to 33.02  | No  | ns   | >0.9999 |  |
| 69                                 | 4 weeks post winter:8 week winter vs. 8 weeks post winter:2 week winter | 23.18  | -8.815 to 55.17  | No  | ns   | 0.4446  |  |
| 70                                 | 4 weeks post winter:8 week winter vs. 8 weeks post winter:4 week winter | 20.08  | -11.06 to 51.21  | No  | ns   | 0.6438  |  |
| 71                                 | 4 weeks post winter:8 week winter vs. 8 weeks post winter:8 week winter | 23.45  | -7.689 to 54.59  | No  | ns   | 0.3775  |  |
| 72                                 | 4 weeks post winter:8 week winter vs. SPC -4 weeks post:2 week winter   | -53.74 | -85.73 to -21.75 | Yes | **** | <0.0001 |  |
| 73                                 | 4 weeks post winter:8 week winter vs. SPC -4 weeks post:4 week winter   | -106.5 | -138.5 to -74.52 | Yes | **** | <0.0001 |  |
| 74                                 | 4 weeks post winter:8 week winter vs. SPC -4 weeks post:8 week winter   | -32.7  | -63.84 to -1.561 | Yes | *    | 0.0296  |  |
| 75                                 | 4 weeks post winter:8 week winter vs. SPC -8 weeks post:2 week winter   | -50.6  | -81.74 to -19.46 | Yes | **** | <0.0001 |  |
| 76                                 | 4 weeks post winter:8 week winter vs. SPC -8 weeks post:4 week winter   | -32.7  | -63.84 to -1.561 | Yes | *    | 0.0296  |  |
| 77                                 | 4 weeks post winter:8 week winter vs. SPC -8 weeks post:8 week winter   | -0.2   | -31.34 to 30.94  | No  | ns   | >0.9999 |  |
| 78                                 | 8 weeks post winter:2 week winter vs. 8 weeks post winter:4 week winter | -3.103 | -35.1 to 28.89   | No  | ns   | >0.9999 |  |
| 79                                 | 8 weeks post winter:2 week winter vs. 8 weeks post winter:8 week winter | 0.2722 | -31.72 to 32.26  | No  | ns   | >0.9999 |  |
| 80                                 | 8 weeks post winter:2 week winter vs. SPC -4 weeks post:2 week winter   | -76.92 | -109.7 to -44.09 | Yes | **** | <0.0001 |  |
| 81                                 | 8 weeks post winter:2 week winter vs. SPC -4 weeks post:4 week winter   | -129.7 | -162.5 to -96.87 | Yes | **** | <0.0001 |  |
| 82                                 | 8 weeks post winter:2 week winter vs. SPC -4 weeks post:8 week winter   | -55.88 | -87.87 to -23.89 | Yes | **** | <0.0001 |  |
| 83                                 | 8 weeks post winter:2 week winter vs. SPC -8 weeks post:2 week winter   | -73.78 | -105.8 to -41.79 | Yes | **** | <0.0001 |  |
| 84                                 | 8 weeks post winter:2 week winter vs. SPC -8 weeks post:4 week winter   | -55.88 | -87.87 to -23.89 | Yes | **** | <0.0001 |  |
| 85                                 | 8 weeks post winter:2 week winter vs. SPC -8 weeks post:8 week winter   | -23.38 | -55.37 to 8.615  | No  | ns   | 0.4295  |  |
| 86                                 | 8 weeks post winter:4 week winter vs. 8 weeks post winter:8 week winter | 3.375  | -27.76 to 34.51  | No  | ns   | >0.9999 |  |
| 87                                 | 8 weeks post winter:4 week winter vs. SPC -4 weeks post:2 week winter   | -73.81 | -105.8 to -41.82 | Yes | **** | <0.0001 |  |
| 88                                 | 8 weeks post winter:4 week winter vs. SPC -4 weeks post:4 week winter   | -126.6 | -158.6 to -94.6  | Yes | **** | <0.0001 |  |
| 89                                 | 8 weeks post winter:4 week winter vs. SPC -4 weeks post:8 week winter   | -52.78 | -83.91 to -21.64 | Yes | **** | <0.0001 |  |
| 90                                 | 8 weeks post winter:4 week winter vs. SPC -8 weeks post:2 week winter   | -70.68 | -101.8 to -39.54 | Yes | **** | <0.0001 |  |

| 2way ANOVA<br>Multiple comparisons |                                                                       |        |                  |            |             |         |    |
|------------------------------------|-----------------------------------------------------------------------|--------|------------------|------------|-------------|---------|----|
| 91                                 | 8 weeks post winter:4 week winter vs. SPC -8 weeks post:4 week winter | -52.78 | -83.91 to -21.64 | Yes        | ****        | <0.0001 |    |
| 92                                 | 8 weeks post winter:4 week winter vs. SPC -8 weeks post:8 week winter | -20.28 | -51.41 to 10.86  | No         | ns          | 0.6279  |    |
| 93                                 | 8 weeks post winter:8 week winter vs. SPC -4 weeks post:2 week winter | -77.19 | -109.2 to -45.2  | Yes        | ****        | <0.0001 |    |
| 94                                 | 8 weeks post winter:8 week winter vs. SPC -4 weeks post:4 week winter | -130   | -162 to -97.97   | Yes        | ****        | <0.0001 |    |
| 95                                 | 8 weeks post winter:8 week winter vs. SPC -4 weeks post:8 week winter | -56.15 | -87.29 to -25.01 | Yes        | ****        | <0.0001 |    |
| 96                                 | 8 weeks post winter:8 week winter vs. SPC -8 weeks post:2 week winter | -74.05 | -105.2 to -42.91 | Yes        | ****        | <0.0001 |    |
| 97                                 | 8 weeks post winter:8 week winter vs. SPC -8 weeks post:4 week winter | -56.15 | -87.29 to -25.01 | Yes        | ****        | <0.0001 |    |
| 98                                 | 8 weeks post winter:8 week winter vs. SPC -8 weeks post:8 week winter | -23.65 | -54.79 to 7.489  | No         | ns          | 0.3630  |    |
| 99                                 | SPC -4 weeks post:2 week winter vs. SPC -4 weeks post:4 week winter   | -52.78 | -85.6 to -19.95  | Yes        | ****        | <0.0001 |    |
| 100                                | SPC -4 weeks post:2 week winter vs. SPC -4 weeks post:8 week winter   | 21.04  | -10.95 to 53.03  | No         | ns          | 0.6116  |    |
| 101                                | SPC -4 weeks post:2 week winter vs. SPC -8 weeks post:2 week winter   | 3.139  | -28.85 to 35.13  | No         | ns          | >0.9999 |    |
| 102                                | SPC -4 weeks post:2 week winter vs. SPC -8 weeks post:4 week winter   | 21.04  | -10.95 to 53.03  | No         | ns          | 0.6116  |    |
| 103                                | SPC -4 weeks post:2 week winter vs. SPC -8 weeks post:8 week winter   | 53.54  | 21.55 to 85.53   | Yes        | ****        | <0.0001 |    |
| 104                                | SPC -4 weeks post:4 week winter vs. SPC -4 weeks post:8 week winter   | 73.82  | 41.82 to 105.8   | Yes        | ****        | <0.0001 |    |
| 105                                | SPC -4 weeks post:4 week winter vs. SPC -8 weeks post:2 week winter   | 55.92  | 23.92 to 87.91   | Yes        | ****        | <0.0001 |    |
| 106                                | SPC -4 weeks post:4 week winter vs. SPC -8 weeks post:4 week winter   | 73.82  | 41.82 to 105.8   | Yes        | ****        | <0.0001 |    |
| 107                                | SPC -4 weeks post:4 week winter vs. SPC -8 weeks post:8 week winter   | 106.3  | 74.32 to 138.3   | Yes        | ****        | <0.0001 |    |
| 108                                | SPC -4 weeks post:8 week winter vs. SPC -8 weeks post:2 week winter   | -17.9  | -49.04 to 13.24  | No         | ns          | 0.8020  |    |
| 109                                | SPC -4 weeks post:8 week winter vs. SPC -8 weeks post:4 week winter   | 0      | -31.14 to 31.14  | No         | ns          | >0.9999 |    |
| 110                                | SPC -4 weeks post:8 week winter vs. SPC -8 weeks post:8 week winter   | 32.5   | 1.361 to 63.64   | Yes        | *           | 0.0317  |    |
| 111                                | SPC -8 weeks post:2 week winter vs. SPC -8 weeks post:4 week winter   | 17.9   | -13.24 to 49.04  | No         | ns          | 0.8020  |    |
| 112                                | SPC -8 weeks post:2 week winter vs. SPC -8 weeks post:8 week winter   | 50.4   | 19.26 to 81.54   | Yes        | ****        | <0.0001 |    |
| 113                                | SPC -8 weeks post:4 week winter vs. SPC -8 weeks post:8 week winter   | 32.5   | 1.361 to 63.64   | Yes        | *           | 0.0317  |    |
| 114                                |                                                                       |        |                  |            |             |         |    |
| 115                                |                                                                       |        |                  |            |             |         |    |
| 116                                | Test details                                                          | Mean 1 | Mean 2           | Mean Diff. | SE of diff. | N1      | N2 |
| 117                                |                                                                       |        |                  |            |             |         |    |
| 118                                | Last day SP:2 week winter vs. Last day SP:4 week winter               | 407.3  | 412.5            | -5.25      | 9.007       | 10      | 10 |
| 119                                | Last day SP:2 week winter vs. Last day SP:8 week winter               | 407.3  | 415.4            | -8.15      | 9.007       | 10      | 10 |
| 120                                | Last day SP:2 week winter vs. 4 weeks post winter:2 week winter       | 407.3  | 349.2            | 58.03      | 9.254       | 10      | 9  |

| 2way ANOVA<br>Multiple comparisons |                                                                 |       |       |        |       |    |    |
|------------------------------------|-----------------------------------------------------------------|-------|-------|--------|-------|----|----|
| 121                                | Last day SP:2 week winter vs. 4 weeks post winter:4 week winter | 407.3 | 367.2 | 40.02  | 9.007 | 10 | 10 |
| 122                                | Last day SP:2 week winter vs. 4 weeks post winter:8 week winter | 407.3 | 365.2 | 42.1   | 9.007 | 10 | 10 |
| 123                                | Last day SP:2 week winter vs. 8 weeks post winter:2 week winter | 407.3 | 342   | 65.28  | 9.254 | 10 | 9  |
| 124                                | Last day SP:2 week winter vs. 8 weeks post winter:4 week winter | 407.3 | 345.1 | 62.18  | 9.007 | 10 | 10 |
| 125                                | Last day SP:2 week winter vs. 8 weeks post winter:8 week winter | 407.3 | 341.7 | 65.55  | 9.007 | 10 | 10 |
| 126                                | Last day SP:2 week winter vs. SPC -4 weeks post:2 week winter   | 407.3 | 418.9 | -11.64 | 9.254 | 10 | 9  |
| 127                                | Last day SP:2 week winter vs. SPC -4 weeks post:4 week winter   | 407.3 | 471.7 | -64.42 | 9.254 | 10 | 9  |
| 128                                | Last day SP:2 week winter vs. SPC -4 weeks post:8 week winter   | 407.3 | 397.9 | 9.4    | 9.007 | 10 | 10 |
| 129                                | Last day SP:2 week winter vs. SPC -8 weeks post:2 week winter   | 407.3 | 415.8 | -8.5   | 9.007 | 10 | 10 |
| 130                                | Last day SP:2 week winter vs. SPC -8 weeks post:4 week winter   | 407.3 | 397.9 | 9.4    | 9.007 | 10 | 10 |
| 131                                | Last day SP:2 week winter vs. SPC -8 weeks post:8 week winter   | 407.3 | 365.4 | 41.9   | 9.007 | 10 | 10 |
| 132                                | Last day SP:4 week winter vs. Last day SP:8 week winter         | 412.5 | 415.4 | -2.9   | 9.007 | 10 | 10 |
| 133                                | Last day SP:4 week winter vs. 4 weeks post winter:2 week winter | 412.5 | 349.2 | 63.28  | 9.254 | 10 | 9  |
| 134                                | Last day SP:4 week winter vs. 4 weeks post winter:4 week winter | 412.5 | 367.2 | 45.27  | 9.007 | 10 | 10 |
| 135                                | Last day SP:4 week winter vs. 4 weeks post winter:8 week winter | 412.5 | 365.2 | 47.35  | 9.007 | 10 | 10 |
| 136                                | Last day SP:4 week winter vs. 8 weeks post winter:2 week winter | 412.5 | 342   | 70.53  | 9.254 | 10 | 9  |
| 137                                | Last day SP:4 week winter vs. 8 weeks post winter:4 week winter | 412.5 | 345.1 | 67.43  | 9.007 | 10 | 10 |
| 138                                | Last day SP:4 week winter vs. 8 weeks post winter:8 week winter | 412.5 | 341.7 | 70.8   | 9.007 | 10 | 10 |
| 139                                | Last day SP:4 week winter vs. SPC -4 weeks post:2 week winter   | 412.5 | 418.9 | -6.389 | 9.254 | 10 | 9  |
| 140                                | Last day SP:4 week winter vs. SPC -4 weeks post:4 week winter   | 412.5 | 471.7 | -59.17 | 9.254 | 10 | 9  |
| 141                                | Last day SP:4 week winter vs. SPC -4 weeks post:8 week winter   | 412.5 | 397.9 | 14.65  | 9.007 | 10 | 10 |
| 142                                | Last day SP:4 week winter vs. SPC -8 weeks post:2 week winter   | 412.5 | 415.8 | -3.25  | 9.007 | 10 | 10 |
| 143                                | Last day SP:4 week winter vs. SPC -8 weeks post:4 week winter   | 412.5 | 397.9 | 14.65  | 9.007 | 10 | 10 |
| 144                                | Last day SP:4 week winter vs. SPC -8 weeks post:8 week winter   | 412.5 | 365.4 | 47.15  | 9.007 | 10 | 10 |
| 145                                | Last day SP:8 week winter vs. 4 weeks post winter:2 week winter | 415.4 | 349.2 | 66.18  | 9.254 | 10 | 9  |
| 146                                | Last day SP:8 week winter vs. 4 weeks post winter:4 week winter | 415.4 | 367.2 | 48.17  | 9.007 | 10 | 10 |
| 147                                | Last day SP:8 week winter vs. 4 weeks post winter:8 week winter | 415.4 | 365.2 | 50.25  | 9.007 | 10 | 10 |
| 148                                | Last day SP:8 week winter vs. 8 weeks post winter:2 week winter | 415.4 | 342   | 73.43  | 9.254 | 10 | 9  |
| 149                                | Last day SP:8 week winter vs. 8 weeks post winter:4 week winter | 415.4 | 345.1 | 70.33  | 9.007 | 10 | 10 |
| 150                                | Last day SP:8 week winter vs. 8 weeks post winter:8 week winter | 415.4 | 341.7 | 73.7   | 9.007 | 10 | 10 |

| 2way ANOVA<br>Multiple comparisons |                                                                         |       |       |        |       |    |    |
|------------------------------------|-------------------------------------------------------------------------|-------|-------|--------|-------|----|----|
| 151                                | Last day SP:8 week winter vs. SPC -4 weeks post:2 week winter           | 415.4 | 418.9 | -3.489 | 9.254 | 10 | 9  |
| 152                                | Last day SP:8 week winter vs. SPC -4 weeks post:4 week winter           | 415.4 | 471.7 | -56.27 | 9.254 | 10 | 9  |
| 153                                | Last day SP:8 week winter vs. SPC -4 weeks post:8 week winter           | 415.4 | 397.9 | 17.55  | 9.007 | 10 | 10 |
| 154                                | Last day SP:8 week winter vs. SPC -8 weeks post:2 week winter           | 415.4 | 415.8 | -0.35  | 9.007 | 10 | 10 |
| 155                                | Last day SP:8 week winter vs. SPC -8 weeks post:4 week winter           | 415.4 | 397.9 | 17.55  | 9.007 | 10 | 10 |
| 156                                | Last day SP:8 week winter vs. SPC -8 weeks post:8 week winter           | 415.4 | 365.4 | 50.05  | 9.007 | 10 | 10 |
| 157                                | 4 weeks post winter:2 week winter vs. 4 weeks post winter:4 week winter | 349.2 | 367.2 | -18.01 | 9.254 | 9  | 10 |
| 158                                | 4 weeks post winter:2 week winter vs. 4 weeks post winter:8 week winter | 349.2 | 365.2 | -15.93 | 9.254 | 9  | 10 |
| 159                                | 4 weeks post winter:2 week winter vs. 8 weeks post winter:2 week winter | 349.2 | 342   | 7.25   | 9.494 | 9  | 9  |
| 160                                | 4 weeks post winter:2 week winter vs. 8 weeks post winter:4 week winter | 349.2 | 345.1 | 4.147  | 9.254 | 9  | 10 |
| 161                                | 4 weeks post winter:2 week winter vs. 8 weeks post winter:8 week winter | 349.2 | 341.7 | 7.522  | 9.254 | 9  | 10 |
| 162                                | 4 weeks post winter:2 week winter vs. SPC -4 weeks post:2 week winter   | 349.2 | 418.9 | -69.67 | 9.494 | 9  | 9  |
| 163                                | 4 weeks post winter:2 week winter vs. SPC -4 weeks post:4 week winter   | 349.2 | 471.7 | -122.4 | 9.494 | 9  | 9  |
| 164                                | 4 weeks post winter:2 week winter vs. SPC -4 weeks post:8 week winter   | 349.2 | 397.9 | -48.63 | 9.254 | 9  | 10 |
| 165                                | 4 weeks post winter:2 week winter vs. SPC -8 weeks post:2 week winter   | 349.2 | 415.8 | -66.53 | 9.254 | 9  | 10 |
| 166                                | 4 weeks post winter:2 week winter vs. SPC -8 weeks post:4 week winter   | 349.2 | 397.9 | -48.63 | 9.254 | 9  | 10 |
| 167                                | 4 weeks post winter:2 week winter vs. SPC -8 weeks post:8 week winter   | 349.2 | 365.4 | -16.13 | 9.254 | 9  | 10 |
| 168                                | 4 weeks post winter:4 week winter vs. 4 weeks post winter:8 week winter | 367.2 | 365.2 | 2.083  | 9.007 | 10 | 10 |
| 169                                | 4 weeks post winter:4 week winter vs. 8 weeks post winter:2 week winter | 367.2 | 342   | 25.26  | 9.254 | 10 | 9  |
| 170                                | 4 weeks post winter:4 week winter vs. 8 weeks post winter:4 week winter | 367.2 | 345.1 | 22.16  | 9.007 | 10 | 10 |
| 171                                | 4 weeks post winter:4 week winter vs. 8 weeks post winter:8 week winter | 367.2 | 341.7 | 25.53  | 9.007 | 10 | 10 |
| 172                                | 4 weeks post winter:4 week winter vs. SPC -4 weeks post:2 week winter   | 367.2 | 418.9 | -51.66 | 9.254 | 10 | 9  |
| 173                                | 4 weeks post winter:4 week winter vs. SPC -4 weeks post:4 week winter   | 367.2 | 471.7 | -104.4 | 9.254 | 10 | 9  |
| 174                                | 4 weeks post winter:4 week winter vs. SPC -4 weeks post:8 week winter   | 367.2 | 397.9 | -30.62 | 9.007 | 10 | 10 |
| 175                                | 4 weeks post winter:4 week winter vs. SPC -8 weeks post:2 week winter   | 367.2 | 415.8 | -48.52 | 9.007 | 10 | 10 |
| 176                                | 4 weeks post winter:4 week winter vs. SPC -8 weeks post:4 week winter   | 367.2 | 397.9 | -30.62 | 9.007 | 10 | 10 |
| 177                                | 4 weeks post winter:4 week winter vs. SPC -8 weeks post:8 week winter   | 367.2 | 365.4 | 1.883  | 9.007 | 10 | 10 |
| 178                                | 4 weeks post winter:8 week winter vs. 8 weeks post winter:2 week winter | 365.2 | 342   | 23.18  | 9.254 | 10 | 9  |
| 179                                | 4 weeks post winter:8 week winter vs. 8 weeks post winter:4 week winter | 365.2 | 345.1 | 20.08  | 9.007 | 10 | 10 |
| 180                                | 4 weeks post winter:8 week winter vs. 8 weeks post winter:8 week winter | 365.2 | 341.7 | 23.45  | 9.007 | 10 | 10 |

| 2way ANOVA<br>Multiple comparisons |                                                                         |       |       |        |       |    |    |
|------------------------------------|-------------------------------------------------------------------------|-------|-------|--------|-------|----|----|
| 181                                | 4 weeks post winter:8 week winter vs. SPC -4 weeks post:2 week winter   | 365.2 | 418.9 | -53.74 | 9.254 | 10 | 9  |
| 182                                | 4 weeks post winter:8 week winter vs. SPC -4 weeks post:4 week winter   | 365.2 | 471.7 | -106.5 | 9.254 | 10 | 9  |
| 183                                | 4 weeks post winter:8 week winter vs. SPC -4 weeks post:8 week winter   | 365.2 | 397.9 | -32.7  | 9.007 | 10 | 10 |
| 184                                | 4 weeks post winter:8 week winter vs. SPC -8 weeks post:2 week winter   | 365.2 | 415.8 | -50.6  | 9.007 | 10 | 10 |
| 185                                | 4 weeks post winter:8 week winter vs. SPC -8 weeks post:4 week winter   | 365.2 | 397.9 | -32.7  | 9.007 | 10 | 10 |
| 186                                | 4 weeks post winter:8 week winter vs. SPC -8 weeks post:8 week winter   | 365.2 | 365.4 | -0.2   | 9.007 | 10 | 10 |
| 187                                | 8 weeks post winter:2 week winter vs. 8 weeks post winter:4 week winter | 342   | 345.1 | -3.103 | 9.254 | 9  | 10 |
| 188                                | 8 weeks post winter:2 week winter vs. 8 weeks post winter:8 week winter | 342   | 341.7 | 0.2722 | 9.254 | 9  | 10 |
| 189                                | 8 weeks post winter:2 week winter vs. SPC -4 weeks post:2 week winter   | 342   | 418.9 | -76.92 | 9.494 | 9  | 9  |
| 190                                | 8 weeks post winter:2 week winter vs. SPC -4 weeks post:4 week winter   | 342   | 471.7 | -129.7 | 9.494 | 9  | 9  |
| 191                                | 8 weeks post winter:2 week winter vs. SPC -4 weeks post:8 week winter   | 342   | 397.9 | -55.88 | 9.254 | 9  | 10 |
| 192                                | 8 weeks post winter:2 week winter vs. SPC -8 weeks post:2 week winter   | 342   | 415.8 | -73.78 | 9.254 | 9  | 10 |
| 193                                | 8 weeks post winter:2 week winter vs. SPC -8 weeks post:4 week winter   | 342   | 397.9 | -55.88 | 9.254 | 9  | 10 |
| 194                                | 8 weeks post winter:2 week winter vs. SPC -8 weeks post:8 week winter   | 342   | 365.4 | -23.38 | 9.254 | 9  | 10 |
| 195                                | 8 weeks post winter:4 week winter vs. 8 weeks post winter:8 week winter | 345.1 | 341.7 | 3.375  | 9.007 | 10 | 10 |
| 196                                | 8 weeks post winter:4 week winter vs. SPC -4 weeks post:2 week winter   | 345.1 | 418.9 | -73.81 | 9.254 | 10 | 9  |
| 197                                | 8 weeks post winter:4 week winter vs. SPC -4 weeks post:4 week winter   | 345.1 | 471.7 | -126.6 | 9.254 | 10 | 9  |
| 198                                | 8 weeks post winter:4 week winter vs. SPC -4 weeks post:8 week winter   | 345.1 | 397.9 | -52.78 | 9.007 | 10 | 10 |
| 199                                | 8 weeks post winter:4 week winter vs. SPC -8 weeks post:2 week winter   | 345.1 | 415.8 | -70.68 | 9.007 | 10 | 10 |
| 200                                | 8 weeks post winter:4 week winter vs. SPC -8 weeks post:4 week winter   | 345.1 | 397.9 | -52.78 | 9.007 | 10 | 10 |
| 201                                | 8 weeks post winter:4 week winter vs. SPC -8 weeks post:8 week winter   | 345.1 | 365.4 | -20.28 | 9.007 | 10 | 10 |
| 202                                | 8 weeks post winter:8 week winter vs. SPC -4 weeks post:2 week winter   | 341.7 | 418.9 | -77.19 | 9.254 | 10 | 9  |
| 203                                | 8 weeks post winter:8 week winter vs. SPC -4 weeks post:4 week winter   | 341.7 | 471.7 | -130   | 9.254 | 10 | 9  |
| 204                                | 8 weeks post winter:8 week winter vs. SPC -4 weeks post:8 week winter   | 341.7 | 397.9 | -56.15 | 9.007 | 10 | 10 |
| 205                                | 8 weeks post winter:8 week winter vs. SPC -8 weeks post:2 week winter   | 341.7 | 415.8 | -74.05 | 9.007 | 10 | 10 |
| 206                                | 8 weeks post winter:8 week winter vs. SPC -8 weeks post:4 week winter   | 341.7 | 397.9 | -56.15 | 9.007 | 10 | 10 |
| 207                                | 8 weeks post winter:8 week winter vs. SPC -8 weeks post:8 week winter   | 341.7 | 365.4 | -23.65 | 9.007 | 10 | 10 |
| 208                                | SPC -4 weeks post:2 week winter vs. SPC -4 weeks post:4 week winter     | 418.9 | 471.7 | -52.78 | 9.494 | 9  | 9  |
| 209                                | SPC -4 weeks post:2 week winter vs. SPC -4 weeks post:8 week winter     | 418.9 | 397.9 | 21.04  | 9.254 | 9  | 10 |
| 210                                | SPC -4 weeks post:2 week winter vs. SPC -8 weeks post:2 week winter     | 418.9 | 415.8 | 3.139  | 9.254 | 9  | 10 |



| <b>2way ANOVA</b><br>Multiple comparisons |                                                                     |       |       |       |       |    |    |
|-------------------------------------------|---------------------------------------------------------------------|-------|-------|-------|-------|----|----|
| <b>211</b>                                | SPC -4 weeks post:2 week winter vs. SPC -8 weeks post:4 week winter | 418.9 | 397.9 | 21.04 | 9.254 | 9  | 10 |
| <b>212</b>                                | SPC -4 weeks post:2 week winter vs. SPC -8 weeks post:8 week winter | 418.9 | 365.4 | 53.54 | 9.254 | 9  | 10 |
| <b>213</b>                                | SPC -4 weeks post:4 week winter vs. SPC -4 weeks post:8 week winter | 471.7 | 397.9 | 73.82 | 9.254 | 9  | 10 |
| <b>214</b>                                | SPC -4 weeks post:4 week winter vs. SPC -8 weeks post:2 week winter | 471.7 | 415.8 | 55.92 | 9.254 | 9  | 10 |
| <b>215</b>                                | SPC -4 weeks post:4 week winter vs. SPC -8 weeks post:4 week winter | 471.7 | 397.9 | 73.82 | 9.254 | 9  | 10 |
| <b>216</b>                                | SPC -4 weeks post:4 week winter vs. SPC -8 weeks post:8 week winter | 471.7 | 365.4 | 106.3 | 9.254 | 9  | 10 |
| <b>217</b>                                | SPC -4 weeks post:8 week winter vs. SPC -8 weeks post:2 week winter | 397.9 | 415.8 | -17.9 | 9.007 | 10 | 10 |
| <b>218</b>                                | SPC -4 weeks post:8 week winter vs. SPC -8 weeks post:4 week winter | 397.9 | 397.9 | 0     | 9.007 | 10 | 10 |
| <b>219</b>                                | SPC -4 weeks post:8 week winter vs. SPC -8 weeks post:8 week winter | 397.9 | 365.4 | 32.5  | 9.007 | 10 | 10 |
| <b>220</b>                                | SPC -8 weeks post:2 week winter vs. SPC -8 weeks post:4 week winter | 415.8 | 397.9 | 17.9  | 9.007 | 10 | 10 |
| <b>221</b>                                | SPC -8 weeks post:2 week winter vs. SPC -8 weeks post:8 week winter | 415.8 | 365.4 | 50.4  | 9.007 | 10 | 10 |
| <b>222</b>                                | SPC -8 weeks post:4 week winter vs. SPC -8 weeks post:8 week winter | 397.9 | 365.4 | 32.5  | 9.007 | 10 | 10 |

|    |  |  |
|----|--|--|
|    |  |  |
|    |  |  |
|    |  |  |
| 1  |  |  |
| 2  |  |  |
| 3  |  |  |
| 4  |  |  |
| 5  |  |  |
| 6  |  |  |
| 7  |  |  |
| 8  |  |  |
| 9  |  |  |
| 10 |  |  |
| 11 |  |  |
| 12 |  |  |
| 13 |  |  |
| 14 |  |  |
| 15 |  |  |
| 16 |  |  |
| 17 |  |  |
| 18 |  |  |
| 19 |  |  |
| 20 |  |  |
| 21 |  |  |
| 22 |  |  |
| 23 |  |  |
| 24 |  |  |
| 25 |  |  |
| 26 |  |  |
| 27 |  |  |
| 28 |  |  |
| 29 |  |  |
| 30 |  |  |

|    |  |  |
|----|--|--|
|    |  |  |
|    |  |  |
|    |  |  |
| 31 |  |  |
| 32 |  |  |
| 33 |  |  |
| 34 |  |  |
| 35 |  |  |
| 36 |  |  |
| 37 |  |  |
| 38 |  |  |
| 39 |  |  |
| 40 |  |  |
| 41 |  |  |
| 42 |  |  |
| 43 |  |  |
| 44 |  |  |
| 45 |  |  |
| 46 |  |  |
| 47 |  |  |
| 48 |  |  |
| 49 |  |  |
| 50 |  |  |
| 51 |  |  |
| 52 |  |  |
| 53 |  |  |
| 54 |  |  |
| 55 |  |  |
| 56 |  |  |
| 57 |  |  |
| 58 |  |  |
| 59 |  |  |
| 60 |  |  |

|    |  |  |
|----|--|--|
|    |  |  |
|    |  |  |
|    |  |  |
| 61 |  |  |
| 62 |  |  |
| 63 |  |  |
| 64 |  |  |
| 65 |  |  |
| 66 |  |  |
| 67 |  |  |
| 68 |  |  |
| 69 |  |  |
| 70 |  |  |
| 71 |  |  |
| 72 |  |  |
| 73 |  |  |
| 74 |  |  |
| 75 |  |  |
| 76 |  |  |
| 77 |  |  |
| 78 |  |  |
| 79 |  |  |
| 80 |  |  |
| 81 |  |  |
| 82 |  |  |
| 83 |  |  |
| 84 |  |  |
| 85 |  |  |
| 86 |  |  |
| 87 |  |  |
| 88 |  |  |
| 89 |  |  |
| 90 |  |  |

|            |        |     |
|------------|--------|-----|
|            |        |     |
|            |        |     |
|            |        |     |
| <b>91</b>  |        |     |
| <b>92</b>  |        |     |
| <b>93</b>  |        |     |
| <b>94</b>  |        |     |
| <b>95</b>  |        |     |
| <b>96</b>  |        |     |
| <b>97</b>  |        |     |
| <b>98</b>  |        |     |
| <b>99</b>  |        |     |
| <b>100</b> |        |     |
| <b>101</b> |        |     |
| <b>102</b> |        |     |
| <b>103</b> |        |     |
| <b>104</b> |        |     |
| <b>105</b> |        |     |
| <b>106</b> |        |     |
| <b>107</b> |        |     |
| <b>108</b> |        |     |
| <b>109</b> |        |     |
| <b>110</b> |        |     |
| <b>111</b> |        |     |
| <b>112</b> |        |     |
| <b>113</b> |        |     |
| <b>114</b> |        |     |
| <b>115</b> |        |     |
| <b>116</b> | q      | DF  |
| <b>117</b> |        |     |
| <b>118</b> | 0.8243 | 131 |
| <b>119</b> | 1.28   | 131 |
| <b>120</b> | 8.868  | 131 |

|            |        |     |
|------------|--------|-----|
|            |        |     |
|            |        |     |
|            |        |     |
| <b>121</b> | 6.283  | 131 |
| <b>122</b> | 6.61   | 131 |
| <b>123</b> | 9.976  | 131 |
| <b>124</b> | 9.762  | 131 |
| <b>125</b> | 10.29  | 131 |
| <b>126</b> | 1.779  | 131 |
| <b>127</b> | 9.845  | 131 |
| <b>128</b> | 1.476  | 131 |
| <b>129</b> | 1.335  | 131 |
| <b>130</b> | 1.476  | 131 |
| <b>131</b> | 6.579  | 131 |
| <b>132</b> | 0.4553 | 131 |
| <b>133</b> | 9.671  | 131 |
| <b>134</b> | 7.108  | 131 |
| <b>135</b> | 7.435  | 131 |
| <b>136</b> | 10.78  | 131 |
| <b>137</b> | 10.59  | 131 |
| <b>138</b> | 11.12  | 131 |
| <b>139</b> | 0.9764 | 131 |
| <b>140</b> | 9.042  | 131 |
| <b>141</b> | 2.3    | 131 |
| <b>142</b> | 0.5103 | 131 |
| <b>143</b> | 2.3    | 131 |
| <b>144</b> | 7.403  | 131 |
| <b>145</b> | 10.11  | 131 |
| <b>146</b> | 7.563  | 131 |
| <b>147</b> | 7.89   | 131 |
| <b>148</b> | 11.22  | 131 |
| <b>149</b> | 11.04  | 131 |
| <b>150</b> | 11.57  | 131 |

|            |         |     |
|------------|---------|-----|
|            |         |     |
|            |         |     |
|            |         |     |
| <b>151</b> | 0.5332  | 131 |
| <b>152</b> | 8.599   | 131 |
| <b>153</b> | 2.756   | 131 |
| <b>154</b> | 0.05495 | 131 |
| <b>155</b> | 2.756   | 131 |
| <b>156</b> | 7.859   | 131 |
| <b>157</b> | 2.753   | 131 |
| <b>158</b> | 2.434   | 131 |
| <b>159</b> | 1.08    | 131 |
| <b>160</b> | 0.6338  | 131 |
| <b>161</b> | 1.15    | 131 |
| <b>162</b> | 10.38   | 131 |
| <b>163</b> | 18.24   | 131 |
| <b>164</b> | 7.432   | 131 |
| <b>165</b> | 10.17   | 131 |
| <b>166</b> | 7.432   | 131 |
| <b>167</b> | 2.465   | 131 |
| <b>168</b> | 0.3271  | 131 |
| <b>169</b> | 3.861   | 131 |
| <b>170</b> | 3.479   | 131 |
| <b>171</b> | 4.009   | 131 |
| <b>172</b> | 7.894   | 131 |
| <b>173</b> | 15.96   | 131 |
| <b>174</b> | 4.807   | 131 |
| <b>175</b> | 7.618   | 131 |
| <b>176</b> | 4.807   | 131 |
| <b>177</b> | 0.2957  | 131 |
| <b>178</b> | 3.542   | 131 |
| <b>179</b> | 3.152   | 131 |
| <b>180</b> | 3.682   | 131 |

|            |        |     |
|------------|--------|-----|
|            |        |     |
|            |        |     |
|            |        |     |
| <b>181</b> | 8.213  | 131 |
| <b>182</b> | 16.28  | 131 |
| <b>183</b> | 5.134  | 131 |
| <b>184</b> | 7.945  | 131 |
| <b>185</b> | 5.134  | 131 |
| <b>186</b> | 0.0314 | 131 |
| <b>187</b> | 0.4742 | 131 |
| <b>188</b> | 0.0416 | 131 |
| <b>189</b> | 11.46  | 131 |
| <b>190</b> | 19.32  | 131 |
| <b>191</b> | 8.54   | 131 |
| <b>192</b> | 11.28  | 131 |
| <b>193</b> | 8.54   | 131 |
| <b>194</b> | 3.573  | 131 |
| <b>195</b> | 0.5299 | 131 |
| <b>196</b> | 11.28  | 131 |
| <b>197</b> | 19.35  | 131 |
| <b>198</b> | 8.286  | 131 |
| <b>199</b> | 11.1   | 131 |
| <b>200</b> | 8.286  | 131 |
| <b>201</b> | 3.183  | 131 |
| <b>202</b> | 11.8   | 131 |
| <b>203</b> | 19.86  | 131 |
| <b>204</b> | 8.816  | 131 |
| <b>205</b> | 11.63  | 131 |
| <b>206</b> | 8.816  | 131 |
| <b>207</b> | 3.713  | 131 |
| <b>208</b> | 7.862  | 131 |
| <b>209</b> | 3.215  | 131 |
| <b>210</b> | 0.4797 | 131 |



|            |       |     |
|------------|-------|-----|
|            |       |     |
|            |       |     |
|            |       |     |
| <b>211</b> | 3.215 | 131 |
| <b>212</b> | 8.182 | 131 |
| <b>213</b> | 11.28 | 131 |
| <b>214</b> | 8.546 | 131 |
| <b>215</b> | 11.28 | 131 |
| <b>216</b> | 16.25 | 131 |
| <b>217</b> | 2.811 | 131 |
| <b>218</b> | 0     | 131 |
| <b>219</b> | 5.103 | 131 |
| <b>220</b> | 2.811 | 131 |
| <b>221</b> | 7.914 | 131 |
| <b>222</b> | 5.103 | 131 |

Data analyzed: Osmolality 2-ANOVA

| <u>Source of Variation</u> | <u>Degrees of Freedom</u> | <u>Sum of Squares</u> | <u>Mean square</u> |
|----------------------------|---------------------------|-----------------------|--------------------|
| Pretreatment               | 2                         | 11772                 | 5886               |
| Treatment                  | 4                         | 146229                | 36557              |
| Interaction                | 8                         | 31215                 | 3902               |
| Residual (error)           | 131                       | 53137                 | 405.6              |
| Total                      | 145                       |                       |                    |

Does Pretreatment have the same effect at all values of Treatment?

Interaction accounts for approximately 13.08% of the total variance.

F = 9.62. DF<sub>n</sub>=8 DF<sub>d</sub>=131

The P value is < 0.0001

If there is no interaction overall, there is a less than 0.01% chance of randomly observing so much interaction in an experiment of this size. The interaction is considered extremely significant.

Since the interaction is statistically significant, the P values that follow for the row and column effects are difficult to interpret.

Does Pretreatment affect the result?

Pretreatment accounts for approximately 4.93% of the total variance.

F = 14.51. DF<sub>n</sub>=2 DF<sub>d</sub>=131

The P value is < 0.0001

If Pretreatment has no effect overall, there is a less than 0.01% chance of randomly observing an effect this big (or bigger) in an experiment of this size. The effect is considered extremely significant.

Does Treatment affect the result?

Treatment accounts for approximately 61.28% of the total variance.

F = 90.13. DF<sub>n</sub>=4 DF<sub>d</sub>=131

The P value is < 0.0001

If Treatment has no effect overall, there is a less than 0.01% chance of randomly observing an effect this big (or bigger) in an experiment of this size. The effect is considered extremely significant.
