# Supplementary material for: RNA profiling identifies novel, photoperiod-history dependent markers associated with enhanced saltwater performance in juvenile Atlantic salmon
Source: PubMed Central journal article supplement (PMC7141700; doi:10.1371/journal.pone.0227496), 2020-04-08
Supplement: pone.0227496.s004.pdf [file pone.0227496.s004.pdf]

| 2way ANOVA<br>Tabular results |                          |                      |         |                 |                    |          |
|-------------------------------|--------------------------|----------------------|---------|-----------------|--------------------|----------|
| 1                             | Table Analyzed           | NKA                  |         |                 |                    |          |
| 2                             |                          |                      |         |                 |                    |          |
| 3                             | Two-way ANOVA            | Ordinary             |         |                 |                    |          |
| 4                             | Alpha                    | 0.05                 |         |                 |                    |          |
| 5                             |                          |                      |         |                 |                    |          |
| 6                             | Source of Variation      | % of total variation | P value | P value summary | Significant?       |          |
| 7                             | Interaction              | 17.94                | 0.0001  | ***             | Yes                |          |
| 8                             | Treatment                | 16.43                | <0.0001 | ****            | Yes                |          |
| 9                             | Pre-treatment            | 11.33                | <0.0001 | ****            | Yes                |          |
| 10                            |                          |                      |         |                 |                    |          |
| 11                            | ANOVA table              | SS (Type III)        | DF      | MS              | F (DFn, DFd)       | P value  |
| 12                            | Interaction              | 218.7                | 8       | 27.34           | F (8, 116) = 4.438 | P=0.0001 |
| 13                            | Treatment                | 200.3                | 4       | 50.07           | F (4, 116) = 8.126 | P<0.0001 |
| 14                            | Pre-treatment            | 138.2                | 2       | 69.09           | F (2, 116) = 11.21 | P<0.0001 |
| 15                            | Residual                 | 714.7                | 116     | 6.162           |                    |          |
| 16                            |                          |                      |         |                 |                    |          |
| 17                            | Number of missing values | 19                   |         |                 |                    |          |

| 2way ANOVA<br>Multiple comparisons |                                                                 |            |                    |              |         |                  |  |
|------------------------------------|-----------------------------------------------------------------|------------|--------------------|--------------|---------|------------------|--|
| 1                                  | Compare cell means regardless of rows and columns               |            |                    |              |         |                  |  |
| 2                                  |                                                                 |            |                    |              |         |                  |  |
| 3                                  | Number of families                                              | 1          |                    |              |         |                  |  |
| 4                                  | Number of comparisons per family                                | 105        |                    |              |         |                  |  |
| 5                                  | Alpha                                                           | 0.05       |                    |              |         |                  |  |
| 6                                  |                                                                 |            |                    |              |         |                  |  |
| 7                                  | Tukey's multiple comparisons test                               | Mean Diff. | 95.00% CI of diff. | Significant? | Summary | Adjusted P Value |  |
| 8                                  |                                                                 |            |                    |              |         |                  |  |
| 9                                  | Last day SP:2 week winter vs. Last day SP:4 week winter         | 1.007      | -2.841 to 4.854    | No           | ns      | 0.9999           |  |
| 10                                 | Last day SP:2 week winter vs. Last day SP:8 week winter         | 0.08288    | -3.765 to 3.93     | No           | ns      | >0.9999          |  |
| 11                                 | Last day SP:2 week winter vs. 4 weeks post winter:2 week winter | 0.577      | -3.27 to 4.424     | No           | ns      | >0.9999          |  |
| 12                                 | Last day SP:2 week winter vs. 4 weeks post winter:4 week winter | -1.097     | -4.944 to 2.751    | No           | ns      | 0.9996           |  |
| 13                                 | Last day SP:2 week winter vs. 4 weeks post winter:8 week winter | -2.436     | -6.389 to 1.516    | No           | ns      | 0.7080           |  |
| 14                                 | Last day SP:2 week winter vs. 8 weeks post winter:2 week winter | 0.5319     | -3.316 to 4.379    | No           | ns      | >0.9999          |  |
| 15                                 | Last day SP:2 week winter vs. 8 weeks post winter:4 week winter | -1.685     | -5.766 to 2.395    | No           | ns      | 0.9827           |  |
| 16                                 | Last day SP:2 week winter vs. 8 weeks post winter:8 week winter | -7.472     | -11.71 to -3.232   | Yes          | ****    | <0.0001          |  |
| 17                                 | Last day SP:2 week winter vs. SPC -4 weeks post:2 week winter   | 1.063      | -3.177 to 5.302    | No           | ns      | >0.9999          |  |
| 18                                 | Last day SP:2 week winter vs. SPC -4 weeks post:4 week winter   | -0.3998    | -4.842 to 4.043    | No           | ns      | >0.9999          |  |
| 19                                 | Last day SP:2 week winter vs. SPC -4 weeks post:8 week winter   | 1.073      | -3.008 to 5.154    | No           | ns      | 0.9998           |  |
| 20                                 | Last day SP:2 week winter vs. SPC -8 weeks post:2 week winter   | 0.2986     | -3.782 to 4.379    | No           | ns      | >0.9999          |  |
| 21                                 | Last day SP:2 week winter vs. SPC -8 weeks post:4 week winter   | 1.073      | -3.008 to 5.154    | No           | ns      | 0.9998           |  |
| 22                                 | Last day SP:2 week winter vs. SPC -8 weeks post:8 week winter   | -1.046     | -4.893 to 2.801    | No           | ns      | 0.9998           |  |
| 23                                 | Last day SP:4 week winter vs. Last day SP:8 week winter         | -0.9238    | -4.771 to 2.924    | No           | ns      | >0.9999          |  |
| 24                                 | Last day SP:4 week winter vs. 4 weeks post winter:2 week winter | -0.4297    | -4.277 to 3.418    | No           | ns      | >0.9999          |  |
| 25                                 | Last day SP:4 week winter vs. 4 weeks post winter:4 week winter | -2.103     | -5.951 to 1.744    | No           | ns      | 0.8509           |  |
| 26                                 | Last day SP:4 week winter vs. 4 weeks post winter:8 week winter | -3.443     | -7.396 to 0.5097   | No           | ns      | 0.1622           |  |
| 27                                 | Last day SP:4 week winter vs. 8 weeks post winter:2 week winter | -0.4748    | -4.322 to 3.373    | No           | ns      | >0.9999          |  |
| 28                                 | Last day SP:4 week winter vs. 8 weeks post winter:4 week winter | -2.692     | -6.773 to 1.389    | No           | ns      | 0.6025           |  |
| 29                                 | Last day SP:4 week winter vs. 8 weeks post winter:8 week winter | -8.479     | -12.72 to -4.239   | Yes          | ****    | <0.0001          |  |
| 30                                 | Last day SP:4 week winter vs. SPC -4 weeks post:2 week winter   | 0.05614    | -4.184 to 4.296    | No           | ns      | >0.9999          |  |

| 2way ANOVA<br>Multiple comparisons |                                                                         |          |                  |     |      |         |  |
|------------------------------------|-------------------------------------------------------------------------|----------|------------------|-----|------|---------|--|
| 31                                 | Last day SP:4 week winter vs. SPC -4 weeks post:4 week winter           | -1.407   | -5.849 to 3.036  | No  | ns   | 0.9988  |  |
| 32                                 | Last day SP:4 week winter vs. SPC -4 weeks post:8 week winter           | 0.06628  | -4.015 to 4.147  | No  | ns   | >0.9999 |  |
| 33                                 | Last day SP:4 week winter vs. SPC -8 weeks post:2 week winter           | -0.7081  | -4.789 to 3.373  | No  | ns   | >0.9999 |  |
| 34                                 | Last day SP:4 week winter vs. SPC -8 weeks post:4 week winter           | 0.06628  | -4.015 to 4.147  | No  | ns   | >0.9999 |  |
| 35                                 | Last day SP:4 week winter vs. SPC -8 weeks post:8 week winter           | -2.053   | -5.9 to 1.795    | No  | ns   | 0.8724  |  |
| 36                                 | Last day SP:8 week winter vs. 4 weeks post winter:2 week winter         | 0.4941   | -3.353 to 4.342  | No  | ns   | >0.9999 |  |
| 37                                 | Last day SP:8 week winter vs. 4 weeks post winter:4 week winter         | -1.18    | -5.027 to 2.668  | No  | ns   | 0.9991  |  |
| 38                                 | Last day SP:8 week winter vs. 4 weeks post winter:8 week winter         | -2.519   | -6.472 to 1.434  | No  | ns   | 0.6579  |  |
| 39                                 | Last day SP:8 week winter vs. 8 weeks post winter:2 week winter         | 0.449    | -3.398 to 4.296  | No  | ns   | >0.9999 |  |
| 40                                 | Last day SP:8 week winter vs. 8 weeks post winter:4 week winter         | -1.768   | -5.849 to 2.313  | No  | ns   | 0.9736  |  |
| 41                                 | Last day SP:8 week winter vs. 8 weeks post winter:8 week winter         | -7.555   | -11.79 to -3.315 | Yes | **** | <0.0001 |  |
| 42                                 | Last day SP:8 week winter vs. SPC -4 weeks post:2 week winter           | 0.9799   | -3.26 to 5.22    | No  | ns   | >0.9999 |  |
| 43                                 | Last day SP:8 week winter vs. SPC -4 weeks post:4 week winter           | -0.4827  | -4.925 to 3.96   | No  | ns   | >0.9999 |  |
| 44                                 | Last day SP:8 week winter vs. SPC -4 weeks post:8 week winter           | 0.9901   | -3.091 to 5.071  | No  | ns   | >0.9999 |  |
| 45                                 | Last day SP:8 week winter vs. SPC -8 weeks post:2 week winter           | 0.2157   | -3.865 to 4.297  | No  | ns   | >0.9999 |  |
| 46                                 | Last day SP:8 week winter vs. SPC -8 weeks post:4 week winter           | 0.9901   | -3.091 to 5.071  | No  | ns   | >0.9999 |  |
| 47                                 | Last day SP:8 week winter vs. SPC -8 weeks post:8 week winter           | -1.129   | -4.976 to 2.718  | No  | ns   | 0.9995  |  |
| 48                                 | 4 weeks post winter:2 week winter vs. 4 weeks post winter:4 week winter | -1.674   | -5.521 to 2.174  | No  | ns   | 0.9727  |  |
| 49                                 | 4 weeks post winter:2 week winter vs. 4 weeks post winter:8 week winter | -3.013   | -6.966 to 0.9394 | No  | ns   | 0.3539  |  |
| 50                                 | 4 weeks post winter:2 week winter vs. 8 weeks post winter:2 week winter | -0.04514 | -3.893 to 3.802  | No  | ns   | >0.9999 |  |
| 51                                 | 4 weeks post winter:2 week winter vs. 8 weeks post winter:4 week winter | -2.262   | -6.343 to 1.818  | No  | ns   | 0.8374  |  |
| 52                                 | 4 weeks post winter:2 week winter vs. 8 weeks post winter:8 week winter | -8.049   | -12.29 to -3.809 | Yes | **** | <0.0001 |  |
| 53                                 | 4 weeks post winter:2 week winter vs. SPC -4 weeks post:2 week winter   | 0.4858   | -3.754 to 4.725  | No  | ns   | >0.9999 |  |
| 54                                 | 4 weeks post winter:2 week winter vs. SPC -4 weeks post:4 week winter   | -0.9768  | -5.419 to 3.466  | No  | ns   | >0.9999 |  |
| 55                                 | 4 weeks post winter:2 week winter vs. SPC -4 weeks post:8 week winter   | 0.496    | -3.585 to 4.577  | No  | ns   | >0.9999 |  |
| 56                                 | 4 weeks post winter:2 week winter vs. SPC -8 weeks post:2 week winter   | -0.2784  | -4.359 to 3.802  | No  | ns   | >0.9999 |  |
| 57                                 | 4 weeks post winter:2 week winter vs. SPC -8 weeks post:4 week winter   | 0.496    | -3.585 to 4.577  | No  | ns   | >0.9999 |  |
| 58                                 | 4 weeks post winter:2 week winter vs. SPC -8 weeks post:8 week winter   | -1.623   | -5.471 to 2.224  | No  | ns   | 0.9791  |  |
| 59                                 | 4 weeks post winter:4 week winter vs. 4 weeks post winter:8 week winter | -1.34    | -5.293 to 2.613  | No  | ns   | 0.9975  |  |
| 60                                 | 4 weeks post winter:4 week winter vs. 8 weeks post winter:2 week winter | 1.629    | -2.219 to 5.476  | No  | ns   | 0.9784  |  |

| 2way ANOVA<br>Multiple comparisons |                                                                         |         |                   |     |      |         |  |
|------------------------------------|-------------------------------------------------------------------------|---------|-------------------|-----|------|---------|--|
| 61                                 | 4 weeks post winter:4 week winter vs. 8 weeks post winter:4 week winter | -0.5886 | -4.669 to 3.492   | No  | ns   | >0.9999 |  |
| 62                                 | 4 weeks post winter:4 week winter vs. 8 weeks post winter:8 week winter | -6.375  | -10.61 to -2.135  | Yes | **** | <0.0001 |  |
| 63                                 | 4 weeks post winter:4 week winter vs. SPC -4 weeks post:2 week winter   | 2.16    | -2.08 to 6.399    | No  | ns   | 0.9068  |  |
| 64                                 | 4 weeks post winter:4 week winter vs. SPC -4 weeks post:4 week winter   | 0.6969  | -3.746 to 5.14    | No  | ns   | >0.9999 |  |
| 65                                 | 4 weeks post winter:4 week winter vs. SPC -4 weeks post:8 week winter   | 2.17    | -1.911 to 6.251   | No  | ns   | 0.8753  |  |
| 66                                 | 4 weeks post winter:4 week winter vs. SPC -8 weeks post:2 week winter   | 1.395   | -2.685 to 5.476   | No  | ns   | 0.9972  |  |
| 67                                 | 4 weeks post winter:4 week winter vs. SPC -8 weeks post:4 week winter   | 2.17    | -1.911 to 6.251   | No  | ns   | 0.8753  |  |
| 68                                 | 4 weeks post winter:4 week winter vs. SPC -8 weeks post:8 week winter   | 0.05069 | -3.797 to 3.898   | No  | ns   | >0.9999 |  |
| 69                                 | 4 weeks post winter:8 week winter vs. 8 weeks post winter:2 week winter | 2.968   | -0.9845 to 6.921  | No  | ns   | 0.3793  |  |
| 70                                 | 4 weeks post winter:8 week winter vs. 8 weeks post winter:4 week winter | 0.7512  | -3.429 to 4.932   | No  | ns   | >0.9999 |  |
| 71                                 | 4 weeks post winter:8 week winter vs. 8 weeks post winter:8 week winter | -5.035  | -9.371 to -0.6998 | Yes | **   | 0.0084  |  |
| 72                                 | 4 weeks post winter:8 week winter vs. SPC -4 weeks post:2 week winter   | 3.499   | -0.8363 to 7.835  | No  | ns   | 0.2633  |  |
| 73                                 | 4 weeks post winter:8 week winter vs. SPC -4 weeks post:4 week winter   | 2.037   | -2.498 to 6.571   | No  | ns   | 0.9643  |  |
| 74                                 | 4 weeks post winter:8 week winter vs. SPC -4 weeks post:8 week winter   | 3.509   | -0.6709 to 7.69   | No  | ns   | 0.2078  |  |
| 75                                 | 4 weeks post winter:8 week winter vs. SPC -8 weeks post:2 week winter   | 2.735   | -1.445 to 6.915   | No  | ns   | 0.6161  |  |
| 76                                 | 4 weeks post winter:8 week winter vs. SPC -8 weeks post:4 week winter   | 3.509   | -0.6709 to 7.69   | No  | ns   | 0.2078  |  |
| 77                                 | 4 weeks post winter:8 week winter vs. SPC -8 weeks post:8 week winter   | 1.39    | -2.562 to 5.343   | No  | ns   | 0.9963  |  |
| 78                                 | 8 weeks post winter:2 week winter vs. 8 weeks post winter:4 week winter | -2.217  | -6.298 to 1.864   | No  | ns   | 0.8566  |  |
| 79                                 | 8 weeks post winter:2 week winter vs. 8 weeks post winter:8 week winter | -8.004  | -12.24 to -3.764  | Yes | **** | <0.0001 |  |
| 80                                 | 8 weeks post winter:2 week winter vs. SPC -4 weeks post:2 week winter   | 0.531   | -3.709 to 4.771   | No  | ns   | >0.9999 |  |
| 81                                 | 8 weeks post winter:2 week winter vs. SPC -4 weeks post:4 week winter   | -0.9317 | -5.374 to 3.511   | No  | ns   | >0.9999 |  |
| 82                                 | 8 weeks post winter:2 week winter vs. SPC -4 weeks post:8 week winter   | 0.5411  | -3.54 to 4.622    | No  | ns   | >0.9999 |  |
| 83                                 | 8 weeks post winter:2 week winter vs. SPC -8 weeks post:2 week winter   | -0.2333 | -4.314 to 3.848   | No  | ns   | >0.9999 |  |
| 84                                 | 8 weeks post winter:2 week winter vs. SPC -8 weeks post:4 week winter   | 0.5411  | -3.54 to 4.622    | No  | ns   | >0.9999 |  |
| 85                                 | 8 weeks post winter:2 week winter vs. SPC -8 weeks post:8 week winter   | -1.578  | -5.425 to 2.269   | No  | ns   | 0.9837  |  |
| 86                                 | 8 weeks post winter:4 week winter vs. 8 weeks post winter:8 week winter | -5.787  | -10.24 to -1.334  | Yes | **   | 0.0015  |  |
| 87                                 | 8 weeks post winter:4 week winter vs. SPC -4 weeks post:2 week winter   | 2.748   | -1.704 to 7.201   | No  | ns   | 0.7061  |  |
| 88                                 | 8 weeks post winter:4 week winter vs. SPC -4 weeks post:4 week winter   | 1.285   | -3.361 to 5.932   | No  | ns   | 0.9997  |  |
| 89                                 | 8 weeks post winter:4 week winter vs. SPC -4 weeks post:8 week winter   | 2.758   | -1.543 to 7.06    | No  | ns   | 0.6484  |  |
| 90                                 | 8 weeks post winter:4 week winter vs. SPC -8 weeks post:2 week winter   | 1.984   | -2.318 to 6.285   | No  | ns   | 0.9558  |  |

| 2way ANOVA<br>Multiple comparisons |                                                                       |         |                 |            |             |         |    |
|------------------------------------|-----------------------------------------------------------------------|---------|-----------------|------------|-------------|---------|----|
| 91                                 | 8 weeks post winter:4 week winter vs. SPC -8 weeks post:4 week winter | 2.758   | -1.543 to 7.06  | No         | ns          | 0.6484  |    |
| 92                                 | 8 weeks post winter:4 week winter vs. SPC -8 weeks post:8 week winter | 0.6392  | -3.442 to 4.72  | No         | ns          | >0.9999 |    |
| 93                                 | 8 weeks post winter:8 week winter vs. SPC -4 weeks post:2 week winter | 8.535   | 3.936 to 13.13  | Yes        | ****        | <0.0001 |    |
| 94                                 | 8 weeks post winter:8 week winter vs. SPC -4 weeks post:4 week winter | 7.072   | 2.286 to 11.86  | Yes        | ***         | 0.0001  |    |
| 95                                 | 8 weeks post winter:8 week winter vs. SPC -4 weeks post:8 week winter | 8.545   | 4.092 to 13     | Yes        | ****        | <0.0001 |    |
| 96                                 | 8 weeks post winter:8 week winter vs. SPC -8 weeks post:2 week winter | 7.77    | 3.318 to 12.22  | Yes        | ****        | <0.0001 |    |
| 97                                 | 8 weeks post winter:8 week winter vs. SPC -8 weeks post:4 week winter | 8.545   | 4.092 to 13     | Yes        | ****        | <0.0001 |    |
| 98                                 | 8 weeks post winter:8 week winter vs. SPC -8 weeks post:8 week winter | 6.426   | 2.186 to 10.67  | Yes        | ****        | <0.0001 |    |
| 99                                 | SPC -4 weeks post:2 week winter vs. SPC -4 weeks post:4 week winter   | -1.463  | -6.249 to 3.324 | No         | ns          | 0.9992  |    |
| 100                                | SPC -4 weeks post:2 week winter vs. SPC -4 weeks post:8 week winter   | 0.01015 | -4.442 to 4.463 | No         | ns          | >0.9999 |    |
| 101                                | SPC -4 weeks post:2 week winter vs. SPC -8 weeks post:2 week winter   | -0.7642 | -5.217 to 3.688 | No         | ns          | >0.9999 |    |
| 102                                | SPC -4 weeks post:2 week winter vs. SPC -8 weeks post:4 week winter   | 0.01015 | -4.442 to 4.463 | No         | ns          | >0.9999 |    |
| 103                                | SPC -4 weeks post:2 week winter vs. SPC -8 weeks post:8 week winter   | -2.109  | -6.349 to 2.131 | No         | ns          | 0.9213  |    |
| 104                                | SPC -4 weeks post:4 week winter vs. SPC -4 weeks post:8 week winter   | 1.473   | -3.173 to 6.119 | No         | ns          | 0.9987  |    |
| 105                                | SPC -4 weeks post:4 week winter vs. SPC -8 weeks post:2 week winter   | 0.6984  | -3.948 to 5.345 | No         | ns          | >0.9999 |    |
| 106                                | SPC -4 weeks post:4 week winter vs. SPC -8 weeks post:4 week winter   | 1.473   | -3.173 to 6.119 | No         | ns          | 0.9987  |    |
| 107                                | SPC -4 weeks post:4 week winter vs. SPC -8 weeks post:8 week winter   | -0.6462 | -5.089 to 3.796 | No         | ns          | >0.9999 |    |
| 108                                | SPC -4 weeks post:8 week winter vs. SPC -8 weeks post:2 week winter   | -0.7744 | -5.076 to 3.527 | No         | ns          | >0.9999 |    |
| 109                                | SPC -4 weeks post:8 week winter vs. SPC -8 weeks post:4 week winter   | 0       | -4.302 to 4.302 | No         | ns          | >0.9999 |    |
| 110                                | SPC -4 weeks post:8 week winter vs. SPC -8 weeks post:8 week winter   | -2.119  | -6.2 to 1.962   | No         | ns          | 0.8935  |    |
| 111                                | SPC -8 weeks post:2 week winter vs. SPC -8 weeks post:4 week winter   | 0.7744  | -3.527 to 5.076 | No         | ns          | >0.9999 |    |
| 112                                | SPC -8 weeks post:2 week winter vs. SPC -8 weeks post:8 week winter   | -1.345  | -5.425 to 2.736 | No         | ns          | 0.9981  |    |
| 113                                | SPC -8 weeks post:4 week winter vs. SPC -8 weeks post:8 week winter   | -2.119  | -6.2 to 1.962   | No         | ns          | 0.8935  |    |
| 114                                |                                                                       |         |                 |            |             |         |    |
| 115                                |                                                                       |         |                 |            |             |         |    |
| 116                                | Test details                                                          | Mean 1  | Mean 2          | Mean Diff. | SE of diff. | N1      | N2 |
| 117                                |                                                                       |         |                 |            |             |         |    |
| 118                                | Last day SP:2 week winter vs. Last day SP:4 week winter               | 2.945   | 1.939           | 1.007      | 1.11        | 10      | 10 |
| 119                                | Last day SP:2 week winter vs. Last day SP:8 week winter               | 2.945   | 2.862           | 0.08288    | 1.11        | 10      | 10 |
| 120                                | Last day SP:2 week winter vs. 4 weeks post winter:2 week winter       | 2.945   | 2.368           | 0.577      | 1.11        | 10      | 10 |

| 2way ANOVA<br>Multiple comparisons |                                                                 |       |       |         |       |    |    |
|------------------------------------|-----------------------------------------------------------------|-------|-------|---------|-------|----|----|
| <b>121</b>                         | Last day SP:2 week winter vs. 4 weeks post winter:4 week winter | 2.945 | 4.042 | -1.097  | 1.11  | 10 | 10 |
| <b>122</b>                         | Last day SP:2 week winter vs. 4 weeks post winter:8 week winter | 2.945 | 5.382 | -2.436  | 1.141 | 10 | 9  |
| <b>123</b>                         | Last day SP:2 week winter vs. 8 weeks post winter:2 week winter | 2.945 | 2.413 | 0.5319  | 1.11  | 10 | 10 |
| <b>124</b>                         | Last day SP:2 week winter vs. 8 weeks post winter:4 week winter | 2.945 | 4.631 | -1.685  | 1.177 | 10 | 8  |
| <b>125</b>                         | Last day SP:2 week winter vs. 8 weeks post winter:8 week winter | 2.945 | 10.42 | -7.472  | 1.223 | 10 | 7  |
| <b>126</b>                         | Last day SP:2 week winter vs. SPC -4 weeks post:2 week winter   | 2.945 | 1.882 | 1.063   | 1.223 | 10 | 7  |
| <b>127</b>                         | Last day SP:2 week winter vs. SPC -4 weeks post:4 week winter   | 2.945 | 3.345 | -0.3998 | 1.282 | 10 | 6  |
| <b>128</b>                         | Last day SP:2 week winter vs. SPC -4 weeks post:8 week winter   | 2.945 | 1.872 | 1.073   | 1.177 | 10 | 8  |
| <b>129</b>                         | Last day SP:2 week winter vs. SPC -8 weeks post:2 week winter   | 2.945 | 2.647 | 0.2986  | 1.177 | 10 | 8  |
| <b>130</b>                         | Last day SP:2 week winter vs. SPC -8 weeks post:4 week winter   | 2.945 | 1.872 | 1.073   | 1.177 | 10 | 8  |
| <b>131</b>                         | Last day SP:2 week winter vs. SPC -8 weeks post:8 week winter   | 2.945 | 3.991 | -1.046  | 1.11  | 10 | 10 |
| <b>132</b>                         | Last day SP:4 week winter vs. Last day SP:8 week winter         | 1.939 | 2.862 | -0.9238 | 1.11  | 10 | 10 |
| <b>133</b>                         | Last day SP:4 week winter vs. 4 weeks post winter:2 week winter | 1.939 | 2.368 | -0.4297 | 1.11  | 10 | 10 |
| <b>134</b>                         | Last day SP:4 week winter vs. 4 weeks post winter:4 week winter | 1.939 | 4.042 | -2.103  | 1.11  | 10 | 10 |
| <b>135</b>                         | Last day SP:4 week winter vs. 4 weeks post winter:8 week winter | 1.939 | 5.382 | -3.443  | 1.141 | 10 | 9  |
| <b>136</b>                         | Last day SP:4 week winter vs. 8 weeks post winter:2 week winter | 1.939 | 2.413 | -0.4748 | 1.11  | 10 | 10 |
| <b>137</b>                         | Last day SP:4 week winter vs. 8 weeks post winter:4 week winter | 1.939 | 4.631 | -2.692  | 1.177 | 10 | 8  |
| <b>138</b>                         | Last day SP:4 week winter vs. 8 weeks post winter:8 week winter | 1.939 | 10.42 | -8.479  | 1.223 | 10 | 7  |
| <b>139</b>                         | Last day SP:4 week winter vs. SPC -4 weeks post:2 week winter   | 1.939 | 1.882 | 0.05614 | 1.223 | 10 | 7  |
| <b>140</b>                         | Last day SP:4 week winter vs. SPC -4 weeks post:4 week winter   | 1.939 | 3.345 | -1.407  | 1.282 | 10 | 6  |
| <b>141</b>                         | Last day SP:4 week winter vs. SPC -4 weeks post:8 week winter   | 1.939 | 1.872 | 0.06628 | 1.177 | 10 | 8  |
| <b>142</b>                         | Last day SP:4 week winter vs. SPC -8 weeks post:2 week winter   | 1.939 | 2.647 | -0.7081 | 1.177 | 10 | 8  |
| <b>143</b>                         | Last day SP:4 week winter vs. SPC -8 weeks post:4 week winter   | 1.939 | 1.872 | 0.06628 | 1.177 | 10 | 8  |
| <b>144</b>                         | Last day SP:4 week winter vs. SPC -8 weeks post:8 week winter   | 1.939 | 3.991 | -2.053  | 1.11  | 10 | 10 |
| <b>145</b>                         | Last day SP:8 week winter vs. 4 weeks post winter:2 week winter | 2.862 | 2.368 | 0.4941  | 1.11  | 10 | 10 |
| <b>146</b>                         | Last day SP:8 week winter vs. 4 weeks post winter:4 week winter | 2.862 | 4.042 | -1.18   | 1.11  | 10 | 10 |
| <b>147</b>                         | Last day SP:8 week winter vs. 4 weeks post winter:8 week winter | 2.862 | 5.382 | -2.519  | 1.141 | 10 | 9  |
| <b>148</b>                         | Last day SP:8 week winter vs. 8 weeks post winter:2 week winter | 2.862 | 2.413 | 0.449   | 1.11  | 10 | 10 |
| <b>149</b>                         | Last day SP:8 week winter vs. 8 weeks post winter:4 week winter | 2.862 | 4.631 | -1.768  | 1.177 | 10 | 8  |
| <b>150</b>                         | Last day SP:8 week winter vs. 8 weeks post winter:8 week winter | 2.862 | 10.42 | -7.555  | 1.223 | 10 | 7  |

| 2way ANOVA<br>Multiple comparisons |                                                                         |       |       |          |       |    |    |
|------------------------------------|-------------------------------------------------------------------------|-------|-------|----------|-------|----|----|
| 151                                | Last day SP:8 week winter vs. SPC -4 weeks post:2 week winter           | 2.862 | 1.882 | 0.9799   | 1.223 | 10 | 7  |
| 152                                | Last day SP:8 week winter vs. SPC -4 weeks post:4 week winter           | 2.862 | 3.345 | -0.4827  | 1.282 | 10 | 6  |
| 153                                | Last day SP:8 week winter vs. SPC -4 weeks post:8 week winter           | 2.862 | 1.872 | 0.9901   | 1.177 | 10 | 8  |
| 154                                | Last day SP:8 week winter vs. SPC -8 weeks post:2 week winter           | 2.862 | 2.647 | 0.2157   | 1.177 | 10 | 8  |
| 155                                | Last day SP:8 week winter vs. SPC -8 weeks post:4 week winter           | 2.862 | 1.872 | 0.9901   | 1.177 | 10 | 8  |
| 156                                | Last day SP:8 week winter vs. SPC -8 weeks post:8 week winter           | 2.862 | 3.991 | -1.129   | 1.11  | 10 | 10 |
| 157                                | 4 weeks post winter:2 week winter vs. 4 weeks post winter:4 week winter | 2.368 | 4.042 | -1.674   | 1.11  | 10 | 10 |
| 158                                | 4 weeks post winter:2 week winter vs. 4 weeks post winter:8 week winter | 2.368 | 5.382 | -3.013   | 1.141 | 10 | 9  |
| 159                                | 4 weeks post winter:2 week winter vs. 8 weeks post winter:2 week winter | 2.368 | 2.413 | -0.04514 | 1.11  | 10 | 10 |
| 160                                | 4 weeks post winter:2 week winter vs. 8 weeks post winter:4 week winter | 2.368 | 4.631 | -2.262   | 1.177 | 10 | 8  |
| 161                                | 4 weeks post winter:2 week winter vs. 8 weeks post winter:8 week winter | 2.368 | 10.42 | -8.049   | 1.223 | 10 | 7  |
| 162                                | 4 weeks post winter:2 week winter vs. SPC -4 weeks post:2 week winter   | 2.368 | 1.882 | 0.4858   | 1.223 | 10 | 7  |
| 163                                | 4 weeks post winter:2 week winter vs. SPC -4 weeks post:4 week winter   | 2.368 | 3.345 | -0.9768  | 1.282 | 10 | 6  |
| 164                                | 4 weeks post winter:2 week winter vs. SPC -4 weeks post:8 week winter   | 2.368 | 1.872 | 0.496    | 1.177 | 10 | 8  |
| 165                                | 4 weeks post winter:2 week winter vs. SPC -8 weeks post:2 week winter   | 2.368 | 2.647 | -0.2784  | 1.177 | 10 | 8  |
| 166                                | 4 weeks post winter:2 week winter vs. SPC -8 weeks post:4 week winter   | 2.368 | 1.872 | 0.496    | 1.177 | 10 | 8  |
| 167                                | 4 weeks post winter:2 week winter vs. SPC -8 weeks post:8 week winter   | 2.368 | 3.991 | -1.623   | 1.11  | 10 | 10 |
| 168                                | 4 weeks post winter:4 week winter vs. 4 weeks post winter:8 week winter | 4.042 | 5.382 | -1.34    | 1.141 | 10 | 9  |
| 169                                | 4 weeks post winter:4 week winter vs. 8 weeks post winter:2 week winter | 4.042 | 2.413 | 1.629    | 1.11  | 10 | 10 |
| 170                                | 4 weeks post winter:4 week winter vs. 8 weeks post winter:4 week winter | 4.042 | 4.631 | -0.5886  | 1.177 | 10 | 8  |
| 171                                | 4 weeks post winter:4 week winter vs. 8 weeks post winter:8 week winter | 4.042 | 10.42 | -6.375   | 1.223 | 10 | 7  |
| 172                                | 4 weeks post winter:4 week winter vs. SPC -4 weeks post:2 week winter   | 4.042 | 1.882 | 2.16     | 1.223 | 10 | 7  |
| 173                                | 4 weeks post winter:4 week winter vs. SPC -4 weeks post:4 week winter   | 4.042 | 3.345 | 0.6969   | 1.282 | 10 | 6  |
| 174                                | 4 weeks post winter:4 week winter vs. SPC -4 weeks post:8 week winter   | 4.042 | 1.872 | 2.17     | 1.177 | 10 | 8  |
| 175                                | 4 weeks post winter:4 week winter vs. SPC -8 weeks post:2 week winter   | 4.042 | 2.647 | 1.395    | 1.177 | 10 | 8  |
| 176                                | 4 weeks post winter:4 week winter vs. SPC -8 weeks post:4 week winter   | 4.042 | 1.872 | 2.17     | 1.177 | 10 | 8  |
| 177                                | 4 weeks post winter:4 week winter vs. SPC -8 weeks post:8 week winter   | 4.042 | 3.991 | 0.05069  | 1.11  | 10 | 10 |
| 178                                | 4 weeks post winter:8 week winter vs. 8 weeks post winter:2 week winter | 5.382 | 2.413 | 2.968    | 1.141 | 9  | 10 |
| 179                                | 4 weeks post winter:8 week winter vs. 8 weeks post winter:4 week winter | 5.382 | 4.631 | 0.7512   | 1.206 | 9  | 8  |
| 180                                | 4 weeks post winter:8 week winter vs. 8 weeks post winter:8 week winter | 5.382 | 10.42 | -5.035   | 1.251 | 9  | 7  |

| 2way ANOVA<br>Multiple comparisons |                                                                         |       |       |         |       |    |    |
|------------------------------------|-------------------------------------------------------------------------|-------|-------|---------|-------|----|----|
| 181                                | 4 weeks post winter:8 week winter vs. SPC -4 weeks post:2 week winter   | 5.382 | 1.882 | 3.499   | 1.251 | 9  | 7  |
| 182                                | 4 weeks post winter:8 week winter vs. SPC -4 weeks post:4 week winter   | 5.382 | 3.345 | 2.037   | 1.308 | 9  | 6  |
| 183                                | 4 weeks post winter:8 week winter vs. SPC -4 weeks post:8 week winter   | 5.382 | 1.872 | 3.509   | 1.206 | 9  | 8  |
| 184                                | 4 weeks post winter:8 week winter vs. SPC -8 weeks post:2 week winter   | 5.382 | 2.647 | 2.735   | 1.206 | 9  | 8  |
| 185                                | 4 weeks post winter:8 week winter vs. SPC -8 weeks post:4 week winter   | 5.382 | 1.872 | 3.509   | 1.206 | 9  | 8  |
| 186                                | 4 weeks post winter:8 week winter vs. SPC -8 weeks post:8 week winter   | 5.382 | 3.991 | 1.39    | 1.141 | 9  | 10 |
| 187                                | 8 weeks post winter:2 week winter vs. 8 weeks post winter:4 week winter | 2.413 | 4.631 | -2.217  | 1.177 | 10 | 8  |
| 188                                | 8 weeks post winter:2 week winter vs. 8 weeks post winter:8 week winter | 2.413 | 10.42 | -8.004  | 1.223 | 10 | 7  |
| 189                                | 8 weeks post winter:2 week winter vs. SPC -4 weeks post:2 week winter   | 2.413 | 1.882 | 0.531   | 1.223 | 10 | 7  |
| 190                                | 8 weeks post winter:2 week winter vs. SPC -4 weeks post:4 week winter   | 2.413 | 3.345 | -0.9317 | 1.282 | 10 | 6  |
| 191                                | 8 weeks post winter:2 week winter vs. SPC -4 weeks post:8 week winter   | 2.413 | 1.872 | 0.5411  | 1.177 | 10 | 8  |
| 192                                | 8 weeks post winter:2 week winter vs. SPC -8 weeks post:2 week winter   | 2.413 | 2.647 | -0.2333 | 1.177 | 10 | 8  |
| 193                                | 8 weeks post winter:2 week winter vs. SPC -8 weeks post:4 week winter   | 2.413 | 1.872 | 0.5411  | 1.177 | 10 | 8  |
| 194                                | 8 weeks post winter:2 week winter vs. SPC -8 weeks post:8 week winter   | 2.413 | 3.991 | -1.578  | 1.11  | 10 | 10 |
| 195                                | 8 weeks post winter:4 week winter vs. 8 weeks post winter:8 week winter | 4.631 | 10.42 | -5.787  | 1.285 | 8  | 7  |
| 196                                | 8 weeks post winter:4 week winter vs. SPC -4 weeks post:2 week winter   | 4.631 | 1.882 | 2.748   | 1.285 | 8  | 7  |
| 197                                | 8 weeks post winter:4 week winter vs. SPC -4 weeks post:4 week winter   | 4.631 | 3.345 | 1.285   | 1.341 | 8  | 6  |
| 198                                | 8 weeks post winter:4 week winter vs. SPC -4 weeks post:8 week winter   | 4.631 | 1.872 | 2.758   | 1.241 | 8  | 8  |
| 199                                | 8 weeks post winter:4 week winter vs. SPC -8 weeks post:2 week winter   | 4.631 | 2.647 | 1.984   | 1.241 | 8  | 8  |
| 200                                | 8 weeks post winter:4 week winter vs. SPC -8 weeks post:4 week winter   | 4.631 | 1.872 | 2.758   | 1.241 | 8  | 8  |
| 201                                | 8 weeks post winter:4 week winter vs. SPC -8 weeks post:8 week winter   | 4.631 | 3.991 | 0.6392  | 1.177 | 8  | 10 |
| 202                                | 8 weeks post winter:8 week winter vs. SPC -4 weeks post:2 week winter   | 10.42 | 1.882 | 8.535   | 1.327 | 7  | 7  |
| 203                                | 8 weeks post winter:8 week winter vs. SPC -4 weeks post:4 week winter   | 10.42 | 3.345 | 7.072   | 1.381 | 7  | 6  |
| 204                                | 8 weeks post winter:8 week winter vs. SPC -4 weeks post:8 week winter   | 10.42 | 1.872 | 8.545   | 1.285 | 7  | 8  |
| 205                                | 8 weeks post winter:8 week winter vs. SPC -8 weeks post:2 week winter   | 10.42 | 2.647 | 7.77    | 1.285 | 7  | 8  |
| 206                                | 8 weeks post winter:8 week winter vs. SPC -8 weeks post:4 week winter   | 10.42 | 1.872 | 8.545   | 1.285 | 7  | 8  |
| 207                                | 8 weeks post winter:8 week winter vs. SPC -8 weeks post:8 week winter   | 10.42 | 3.991 | 6.426   | 1.223 | 7  | 10 |
| 208                                | SPC -4 weeks post:2 week winter vs. SPC -4 weeks post:4 week winter     | 1.882 | 3.345 | -1.463  | 1.381 | 7  | 6  |
| 209                                | SPC -4 weeks post:2 week winter vs. SPC -4 weeks post:8 week winter     | 1.882 | 1.872 | 0.01015 | 1.285 | 7  | 8  |
| 210                                | SPC -4 weeks post:2 week winter vs. SPC -8 weeks post:2 week winter     | 1.882 | 2.647 | -0.7642 | 1.285 | 7  | 8  |



| <b>2way ANOVA</b><br>Multiple comparisons |                                                                     |       |       |         |       |   |    |
|-------------------------------------------|---------------------------------------------------------------------|-------|-------|---------|-------|---|----|
| <b>211</b>                                | SPC -4 weeks post:2 week winter vs. SPC -8 weeks post:4 week winter | 1.882 | 1.872 | 0.01015 | 1.285 | 7 | 8  |
| <b>212</b>                                | SPC -4 weeks post:2 week winter vs. SPC -8 weeks post:8 week winter | 1.882 | 3.991 | -2.109  | 1.223 | 7 | 10 |
| <b>213</b>                                | SPC -4 weeks post:4 week winter vs. SPC -4 weeks post:8 week winter | 3.345 | 1.872 | 1.473   | 1.341 | 6 | 8  |
| <b>214</b>                                | SPC -4 weeks post:4 week winter vs. SPC -8 weeks post:2 week winter | 3.345 | 2.647 | 0.6984  | 1.341 | 6 | 8  |
| <b>215</b>                                | SPC -4 weeks post:4 week winter vs. SPC -8 weeks post:4 week winter | 3.345 | 1.872 | 1.473   | 1.341 | 6 | 8  |
| <b>216</b>                                | SPC -4 weeks post:4 week winter vs. SPC -8 weeks post:8 week winter | 3.345 | 3.991 | -0.6462 | 1.282 | 6 | 10 |
| <b>217</b>                                | SPC -4 weeks post:8 week winter vs. SPC -8 weeks post:2 week winter | 1.872 | 2.647 | -0.7744 | 1.241 | 8 | 8  |
| <b>218</b>                                | SPC -4 weeks post:8 week winter vs. SPC -8 weeks post:4 week winter | 1.872 | 1.872 | 0       | 1.241 | 8 | 8  |
| <b>219</b>                                | SPC -4 weeks post:8 week winter vs. SPC -8 weeks post:8 week winter | 1.872 | 3.991 | -2.119  | 1.177 | 8 | 10 |
| <b>220</b>                                | SPC -8 weeks post:2 week winter vs. SPC -8 weeks post:4 week winter | 2.647 | 1.872 | 0.7744  | 1.241 | 8 | 8  |
| <b>221</b>                                | SPC -8 weeks post:2 week winter vs. SPC -8 weeks post:8 week winter | 2.647 | 3.991 | -1.345  | 1.177 | 8 | 10 |
| <b>222</b>                                | SPC -8 weeks post:4 week winter vs. SPC -8 weeks post:8 week winter | 1.872 | 3.991 | -2.119  | 1.177 | 8 | 10 |

|    |  |  |
|----|--|--|
|    |  |  |
|    |  |  |
|    |  |  |
| 1  |  |  |
| 2  |  |  |
| 3  |  |  |
| 4  |  |  |
| 5  |  |  |
| 6  |  |  |
| 7  |  |  |
| 8  |  |  |
| 9  |  |  |
| 10 |  |  |
| 11 |  |  |
| 12 |  |  |
| 13 |  |  |
| 14 |  |  |
| 15 |  |  |
| 16 |  |  |
| 17 |  |  |
| 18 |  |  |
| 19 |  |  |
| 20 |  |  |
| 21 |  |  |
| 22 |  |  |
| 23 |  |  |
| 24 |  |  |
| 25 |  |  |
| 26 |  |  |
| 27 |  |  |
| 28 |  |  |
| 29 |  |  |
| 30 |  |  |

|    |  |  |
|----|--|--|
|    |  |  |
|    |  |  |
|    |  |  |
| 31 |  |  |
| 32 |  |  |
| 33 |  |  |
| 34 |  |  |
| 35 |  |  |
| 36 |  |  |
| 37 |  |  |
| 38 |  |  |
| 39 |  |  |
| 40 |  |  |
| 41 |  |  |
| 42 |  |  |
| 43 |  |  |
| 44 |  |  |
| 45 |  |  |
| 46 |  |  |
| 47 |  |  |
| 48 |  |  |
| 49 |  |  |
| 50 |  |  |
| 51 |  |  |
| 52 |  |  |
| 53 |  |  |
| 54 |  |  |
| 55 |  |  |
| 56 |  |  |
| 57 |  |  |
| 58 |  |  |
| 59 |  |  |
| 60 |  |  |

|    |  |  |
|----|--|--|
|    |  |  |
|    |  |  |
|    |  |  |
| 61 |  |  |
| 62 |  |  |
| 63 |  |  |
| 64 |  |  |
| 65 |  |  |
| 66 |  |  |
| 67 |  |  |
| 68 |  |  |
| 69 |  |  |
| 70 |  |  |
| 71 |  |  |
| 72 |  |  |
| 73 |  |  |
| 74 |  |  |
| 75 |  |  |
| 76 |  |  |
| 77 |  |  |
| 78 |  |  |
| 79 |  |  |
| 80 |  |  |
| 81 |  |  |
| 82 |  |  |
| 83 |  |  |
| 84 |  |  |
| 85 |  |  |
| 86 |  |  |
| 87 |  |  |
| 88 |  |  |
| 89 |  |  |
| 90 |  |  |

|            |        |     |
|------------|--------|-----|
|            |        |     |
|            |        |     |
|            |        |     |
| <b>91</b>  |        |     |
| <b>92</b>  |        |     |
| <b>93</b>  |        |     |
| <b>94</b>  |        |     |
| <b>95</b>  |        |     |
| <b>96</b>  |        |     |
| <b>97</b>  |        |     |
| <b>98</b>  |        |     |
| <b>99</b>  |        |     |
| <b>100</b> |        |     |
| <b>101</b> |        |     |
| <b>102</b> |        |     |
| <b>103</b> |        |     |
| <b>104</b> |        |     |
| <b>105</b> |        |     |
| <b>106</b> |        |     |
| <b>107</b> |        |     |
| <b>108</b> |        |     |
| <b>109</b> |        |     |
| <b>110</b> |        |     |
| <b>111</b> |        |     |
| <b>112</b> |        |     |
| <b>113</b> |        |     |
| <b>114</b> |        |     |
| <b>115</b> |        |     |
| <b>116</b> | q      | DF  |
| <b>117</b> |        |     |
| <b>118</b> | 1.282  | 116 |
| <b>119</b> | 0.1056 | 116 |
| <b>120</b> | 0.7351 | 116 |

|            |         |     |
|------------|---------|-----|
|            |         |     |
|            |         |     |
|            |         |     |
| <b>121</b> | 1.397   | 116 |
| <b>122</b> | 3.021   | 116 |
| <b>123</b> | 0.6776  | 116 |
| <b>124</b> | 2.024   | 116 |
| <b>125</b> | 8.638   | 116 |
| <b>126</b> | 1.229   | 116 |
| <b>127</b> | 0.4411  | 116 |
| <b>128</b> | 1.289   | 116 |
| <b>129</b> | 0.3586  | 116 |
| <b>130</b> | 1.289   | 116 |
| <b>131</b> | 1.333   | 116 |
| <b>132</b> | 1.177   | 116 |
| <b>133</b> | 0.5474  | 116 |
| <b>134</b> | 2.68    | 116 |
| <b>135</b> | 4.269   | 116 |
| <b>136</b> | 0.6049  | 116 |
| <b>137</b> | 3.233   | 116 |
| <b>138</b> | 9.802   | 116 |
| <b>139</b> | 0.0649  | 116 |
| <b>140</b> | 1.552   | 116 |
| <b>141</b> | 0.07961 | 116 |
| <b>142</b> | 0.8505  | 116 |
| <b>143</b> | 0.07961 | 116 |
| <b>144</b> | 2.615   | 116 |
| <b>145</b> | 0.6295  | 116 |
| <b>146</b> | 1.503   | 116 |
| <b>147</b> | 3.124   | 116 |
| <b>148</b> | 0.572   | 116 |
| <b>149</b> | 2.124   | 116 |
| <b>150</b> | 8.734   | 116 |

|            |         |     |
|------------|---------|-----|
|            |         |     |
|            |         |     |
|            |         |     |
| <b>151</b> | 1.133   | 116 |
| <b>152</b> | 0.5326  | 116 |
| <b>153</b> | 1.189   | 116 |
| <b>154</b> | 0.2591  | 116 |
| <b>155</b> | 1.189   | 116 |
| <b>156</b> | 1.438   | 116 |
| <b>157</b> | 2.132   | 116 |
| <b>158</b> | 3.737   | 116 |
| <b>159</b> | 0.0575  | 116 |
| <b>160</b> | 2.717   | 116 |
| <b>161</b> | 9.305   | 116 |
| <b>162</b> | 0.5616  | 116 |
| <b>163</b> | 1.078   | 116 |
| <b>164</b> | 0.5957  | 116 |
| <b>165</b> | 0.3344  | 116 |
| <b>166</b> | 0.5957  | 116 |
| <b>167</b> | 2.068   | 116 |
| <b>168</b> | 1.661   | 116 |
| <b>169</b> | 2.075   | 116 |
| <b>170</b> | 0.7069  | 116 |
| <b>171</b> | 7.37    | 116 |
| <b>172</b> | 2.497   | 116 |
| <b>173</b> | 0.7689  | 116 |
| <b>174</b> | 2.606   | 116 |
| <b>175</b> | 1.676   | 116 |
| <b>176</b> | 2.606   | 116 |
| <b>177</b> | 0.06457 | 116 |
| <b>178</b> | 3.681   | 116 |
| <b>179</b> | 0.8807  | 116 |
| <b>180</b> | 5.693   | 116 |

|            |         |     |
|------------|---------|-----|
|            |         |     |
|            |         |     |
|            |         |     |
| <b>181</b> | 3.956   | 116 |
| <b>182</b> | 2.202   | 116 |
| <b>183</b> | 4.115   | 116 |
| <b>184</b> | 3.207   | 116 |
| <b>185</b> | 4.115   | 116 |
| <b>186</b> | 1.724   | 116 |
| <b>187</b> | 2.663   | 116 |
| <b>188</b> | 9.253   | 116 |
| <b>189</b> | 0.6138  | 116 |
| <b>190</b> | 1.028   | 116 |
| <b>191</b> | 0.6499  | 116 |
| <b>192</b> | 0.2802  | 116 |
| <b>193</b> | 0.6499  | 116 |
| <b>194</b> | 2.01    | 116 |
| <b>195</b> | 6.37    | 116 |
| <b>196</b> | 3.025   | 116 |
| <b>197</b> | 1.356   | 116 |
| <b>198</b> | 3.143   | 116 |
| <b>199</b> | 2.261   | 116 |
| <b>200</b> | 3.143   | 116 |
| <b>201</b> | 0.7678  | 116 |
| <b>202</b> | 9.097   | 116 |
| <b>203</b> | 7.242   | 116 |
| <b>204</b> | 9.406   | 116 |
| <b>205</b> | 8.554   | 116 |
| <b>206</b> | 9.406   | 116 |
| <b>207</b> | 7.429   | 116 |
| <b>208</b> | 1.498   | 116 |
| <b>209</b> | 0.01117 | 116 |
| <b>210</b> | 0.8413  | 116 |



|            |         |     |
|------------|---------|-----|
|            |         |     |
|            |         |     |
|            |         |     |
| <b>211</b> | 0.01117 | 116 |
| <b>212</b> | 2.438   | 116 |
| <b>213</b> | 1.554   | 116 |
| <b>214</b> | 0.7368  | 116 |
| <b>215</b> | 1.554   | 116 |
| <b>216</b> | 0.713   | 116 |
| <b>217</b> | 0.8824  | 116 |
| <b>218</b> | 0       | 116 |
| <b>219</b> | 2.545   | 116 |
| <b>220</b> | 0.8824  | 116 |
| <b>221</b> | 1.615   | 116 |
| <b>222</b> | 2.545   | 116 |

Data analyzed: NKA

| <u>Source of Variation</u> | <u>Degrees of Freedom</u> | <u>Sum of Squares</u> | <u>Mean square</u> |
|----------------------------|---------------------------|-----------------------|--------------------|
| Pre-treatment              | 2                         | 138.2                 | 69.09              |
| Treatment                  | 4                         | 200.3                 | 50.07              |
| Interaction                | 8                         | 218.7                 | 27.34              |
| Residual (error)           | 116                       | 714.7                 | 6.162              |
| Total                      | 130                       |                       |                    |

Does Pre-treatment have the same effect at all values of Treatment?

Interaction accounts for approximately 17.94% of the total variance.

$F = 4.44$ .  $DFn=8$   $DFd=116$

The P value = 0.0001

If there is no interaction overall, there is a 0.01% chance of randomly observing so much interaction in an experiment of this size. The interaction is considered extremely significant.

Since the interaction is statistically significant, the P values that follow for the row and column effects are difficult to interpret.

Does Pre-treatment affect the result?

Pre-treatment accounts for approximately 11.33% of the total variance.

$F = 11.21$ .  $DFn=2$   $DFd=116$

The P value is  $< 0.0001$

If Pre-treatment has no effect overall, there is a less than 0.01% chance of randomly observing an effect this big (or bigger) in an experiment of this size. The effect is considered extremely significant.

Does Treatment affect the result?

Treatment accounts for approximately 16.43% of the total variance.

$F = 8.13$ .  $DFn=4$   $DFd=116$

The P value is  $< 0.0001$

If Treatment has no effect overall, there is a less than 0.01% chance of randomly observing an effect this big (or bigger) in an experiment of this size. The effect is considered extremely significant.
