# Supplementary material for: RNA profiling identifies novel, photoperiod-history dependent markers associated with enhanced saltwater performance in juvenile Atlantic salmon
Source: PubMed Central journal article supplement (PMC7141700; doi:10.1371/journal.pone.0227496), 2020-04-08
Supplement: pone.0227496.s005.pdf [file pone.0227496.s005.pdf]

**Experiment 1**

| Day |      | Weight (g) |       |       | Condition factor |         |         |
|-----|------|------------|-------|-------|------------------|---------|---------|
|     |      | LL         | SP    | SPLL  | LL               | SP      | SPLL    |
| 1   | Mean | 49.48      | -     | -     | 1.229            | -       | -       |
|     | N    | 6          | -     | -     | 6                | -       | -       |
|     | SD   | 7.038      | -     | -     | 0.2444           | -       | -       |
| 32  | Mean | 48.5       | 55.33 | -     | 1.308            | 1.322   | -       |
|     | N    | 6          | 6     | -     | 6                | 6       | -       |
|     | SD   | 4.604      | 8.029 | -     | 0.04799          | 0.03741 | -       |
| 53  | Mean | 73.83      | 60.17 | -     | 1.255            | 1.307   | -       |
|     | N    | 6          | 6     | -     | 6                | 6       | -       |
|     | SD   | 11.06      | 6.601 | -     | 0.03581          | 0.05045 | -       |
| 68  | Mean | 87         | 63.58 | 65.58 | 1.29             | 1.278   | 1.395   |
|     | N    | 6          | 6     | 6     | 6                | 6       | 6       |
|     | SD   | 8.55       | 16.56 | 13.4  | 0.07972          | 0.1027  | 0.0661  |
| 89  | Mean | 91.47      | 70.23 | 85.38 | 1.252            | 1.259   | 1.243   |
|     | N    | 6          | 6     | 6     | 6                | 6       | 6       |
|     | SD   | 29.3       | 10.76 | 21.52 | 0.02426          | 0.05877 | 0.02863 |
| 110 | Mean | 91.33      | 78.42 | 81.67 | 1.252            | 1.301   | 1.111   |
|     | N    | 6          | 6     | 6     | 6                | 6       | 6       |
|     | SD   | 22.68      | 18.23 | 15.91 | 0.04977          | 0.05067 | 0.07973 |

| 2way ANOVA<br>Tabular results |                          |                      |         |                 |                    |          |
|-------------------------------|--------------------------|----------------------|---------|-----------------|--------------------|----------|
| 1                             | Table Analyzed           | Weight 2013          |         |                 |                    |          |
| 2                             |                          |                      |         |                 |                    |          |
| 3                             | Two-way ANOVA            | Ordinary             |         |                 |                    |          |
| 4                             | Alpha                    | 0.05                 |         |                 |                    |          |
| 5                             |                          |                      |         |                 |                    |          |
| 6                             | Source of Variation      | % of total variation | P value | P value summary | Significant?       |          |
| 7                             | Interaction              | 2.841                | 0.7834  | ns              | No                 |          |
| 8                             | Time                     | 7.107                | 0.1259  | ns              | No                 |          |
| 9                             | Treatment                | 16.38                | 0.0109  | *               | Yes                |          |
| 10                            |                          |                      |         |                 |                    |          |
| 11                            | ANOVA table              | SS                   | DF      | MS              | F (DFn, DFd)       | P value  |
| 12                            | Interaction              | 590.9                | 4       | 147.7           | F (4, 45) = 0.4339 | P=0.7834 |
| 13                            | Time                     | 1478                 | 2       | 739.1           | F (2, 45) = 2.171  | P=0.1259 |
| 14                            | Treatment                | 3408                 | 2       | 1704            | F (2, 45) = 5.004  | P=0.0109 |
| 15                            | Residual                 | 15321                | 45      | 340.5           |                    |          |
| 16                            |                          |                      |         |                 |                    |          |
| 17                            | Number of missing values | 0                    |         |                 |                    |          |

| 2way ANOVA<br>Multiple comparisons |                                                               |            |                    |              |             |                  |    |        |    |
|------------------------------------|---------------------------------------------------------------|------------|--------------------|--------------|-------------|------------------|----|--------|----|
| 1                                  | Within each row, compare columns (simple effects within rows) |            |                    |              |             |                  |    |        |    |
| 2                                  |                                                               |            |                    |              |             |                  |    |        |    |
| 3                                  | Number of families                                            | 3          |                    |              |             |                  |    |        |    |
| 4                                  | Number of comparisons per family                              | 3          |                    |              |             |                  |    |        |    |
| 5                                  | Alpha                                                         | 0.05       |                    |              |             |                  |    |        |    |
| 6                                  |                                                               |            |                    |              |             |                  |    |        |    |
| 7                                  | Tukey's multiple comparisons test                             | Mean Diff. | 95.00% CI of diff. | Significant? | Summary     | Adjusted P Value |    |        |    |
| 8                                  |                                                               |            |                    |              |             |                  |    |        |    |
| 9                                  | 68                                                            |            |                    |              |             |                  |    |        |    |
| 10                                 | LL vs. SP                                                     | 23.42      | -2.402 to 49.24    | No           | ns          | 0.0824           |    |        |    |
| 11                                 | LL vs. SPLL                                                   | 21.42      | -4.402 to 47.24    | No           | ns          | 0.1214           |    |        |    |
| 12                                 | SP vs. SPLL                                                   | -2         | -27.82 to 23.82    | No           | ns          | 0.9808           |    |        |    |
| 13                                 |                                                               |            |                    |              |             |                  |    |        |    |
| 14                                 | 89                                                            |            |                    |              |             |                  |    |        |    |
| 15                                 | LL vs. SP                                                     | 21.23      | -4.586 to 47.05    | No           | ns          | 0.1256           |    |        |    |
| 16                                 | LL vs. SPLL                                                   | 6.083      | -19.74 to 31.9     | No           | ns          | 0.8362           |    |        |    |
| 17                                 | SP vs. SPLL                                                   | -15.15     | -40.97 to 10.67    | No           | ns          | 0.3383           |    |        |    |
| 18                                 |                                                               |            |                    |              |             |                  |    |        |    |
| 19                                 | 110                                                           |            |                    |              |             |                  |    |        |    |
| 20                                 | LL vs. SP                                                     | 12.92      | -12.9 to 38.74     | No           | ns          | 0.4521           |    |        |    |
| 21                                 | LL vs. SPLL                                                   | 9.667      | -16.15 to 35.49    | No           | ns          | 0.6385           |    |        |    |
| 22                                 | SP vs. SPLL                                                   | -3.25      | -29.07 to 22.57    | No           | ns          | 0.9500           |    |        |    |
| 23                                 |                                                               |            |                    |              |             |                  |    |        |    |
| 24                                 |                                                               |            |                    |              |             |                  |    |        |    |
| 25                                 | Test details                                                  | Mean 1     | Mean 2             | Mean Diff.   | SE of diff. | N1               | N2 | q      | DF |
| 26                                 |                                                               |            |                    |              |             |                  |    |        |    |
| 27                                 | 68                                                            |            |                    |              |             |                  |    |        |    |
| 28                                 | LL vs. SP                                                     | 87         | 63.58              | 23.42        | 10.65       | 6                | 6  | 3.109  | 45 |
| 29                                 | LL vs. SPLL                                                   | 87         | 65.58              | 21.42        | 10.65       | 6                | 6  | 2.843  | 45 |
| 30                                 | SP vs. SPLL                                                   | 63.58      | 65.58              | -2           | 10.65       | 6                | 6  | 0.2655 | 45 |

| 2way ANOVA<br>Multiple comparisons |             |       |       |        |       |   |   |        |    |
|------------------------------------|-------------|-------|-------|--------|-------|---|---|--------|----|
| <b>31</b>                          |             |       |       |        |       |   |   |        |    |
| <b>32</b>                          | 89          |       |       |        |       |   |   |        |    |
| <b>33</b>                          | LL vs. SP   | 91.47 | 70.23 | 21.23  | 10.65 | 6 | 6 | 2.819  | 45 |
| <b>34</b>                          | LL vs. SPLL | 91.47 | 85.38 | 6.083  | 10.65 | 6 | 6 | 0.8076 | 45 |
| <b>35</b>                          | SP vs. SPLL | 70.23 | 85.38 | -15.15 | 10.65 | 6 | 6 | 2.011  | 45 |
| <b>36</b>                          |             |       |       |        |       |   |   |        |    |
| <b>37</b>                          | 110         |       |       |        |       |   |   |        |    |
| <b>38</b>                          | LL vs. SP   | 91.33 | 78.42 | 12.92  | 10.65 | 6 | 6 | 1.715  | 45 |
| <b>39</b>                          | LL vs. SPLL | 91.33 | 81.67 | 9.667  | 10.65 | 6 | 6 | 1.283  | 45 |
| <b>40</b>                          | SP vs. SPLL | 78.42 | 81.67 | -3.25  | 10.65 | 6 | 6 | 0.4314 | 45 |

| 2way ANOVA<br>Tabular results |                          |                       |         |                 |                   |          |
|-------------------------------|--------------------------|-----------------------|---------|-----------------|-------------------|----------|
| 1                             | Table Analyzed           | Condition factor 2013 |         |                 |                   |          |
| 2                             |                          |                       |         |                 |                   |          |
| 3                             | Two-way ANOVA            | Ordinary              |         |                 |                   |          |
| 4                             | Alpha                    | 0.05                  |         |                 |                   |          |
| 5                             |                          |                       |         |                 |                   |          |
| 6                             | Source of Variation      | % of total variation  | P value | P value summary | Significant?      |          |
| 7                             | Interaction              | 35.57                 | <0.0001 | ****            | Yes               |          |
| 8                             | Time                     | 20.95                 | 0.0001  | ***             | Yes               |          |
| 9                             | Treatment                | 1.731                 | 0.4009  | ns              | No                |          |
| 10                            |                          |                       |         |                 |                   |          |
| 11                            | ANOVA table              | SS                    | DF      | MS              | F (DFn, DFd)      | P value  |
| 12                            | Interaction              | 0.1598                | 4       | 0.03996         | F (4, 45) = 9.583 | P<0.0001 |
| 13                            | Time                     | 0.09413               | 2       | 0.04706         | F (2, 45) = 11.29 | P=0.0001 |
| 14                            | Treatment                | 0.00778               | 2       | 0.00389         | F (2, 45) = 0.933 | P=0.4009 |
| 15                            | Residual                 | 0.1876                | 45      | 0.00417         |                   |          |
| 16                            |                          |                       |         |                 |                   |          |
| 17                            | Number of missing values | 0                     |         |                 |                   |          |

| 2way ANOVA<br>Multiple comparisons |                                                               |            |                     |              |             |                  |    |        |    |
|------------------------------------|---------------------------------------------------------------|------------|---------------------|--------------|-------------|------------------|----|--------|----|
| 1                                  | Within each row, compare columns (simple effects within rows) |            |                     |              |             |                  |    |        |    |
| 2                                  |                                                               |            |                     |              |             |                  |    |        |    |
| 3                                  | Number of families                                            | 3          |                     |              |             |                  |    |        |    |
| 4                                  | Number of comparisons per family                              | 3          |                     |              |             |                  |    |        |    |
| 5                                  | Alpha                                                         | 0.05       |                     |              |             |                  |    |        |    |
| 6                                  |                                                               |            |                     |              |             |                  |    |        |    |
| 7                                  | Tukey's multiple comparisons test                             | Mean Diff. | 95.00% CI of diff.  | Significant? | Summary     | Adjusted P Value |    |        |    |
| 8                                  |                                                               |            |                     |              |             |                  |    |        |    |
| 9                                  | 68                                                            |            |                     |              |             |                  |    |        |    |
| 10                                 | LL vs. SP                                                     | 0.01239    | -0.07797 to 0.1027  | No           | ns          | 0.9411           |    |        |    |
| 11                                 | LL vs. SPLL                                                   | -0.1048    | -0.1952 to -0.01447 | Yes          | *           | 0.0195           |    |        |    |
| 12                                 | SP vs. SPLL                                                   | -0.1172    | -0.2076 to -0.02685 | Yes          | **          | 0.0081           |    |        |    |
| 13                                 |                                                               |            |                     |              |             |                  |    |        |    |
| 14                                 | 89                                                            |            |                     |              |             |                  |    |        |    |
| 15                                 | LL vs. SP                                                     | -0.006284  | -0.09664 to 0.08407 | No           | ns          | 0.9845           |    |        |    |
| 16                                 | LL vs. SPLL                                                   | 0.008936   | -0.08142 to 0.09929 | No           | ns          | 0.9688           |    |        |    |
| 17                                 | SP vs. SPLL                                                   | 0.01522    | -0.07513 to 0.1056  | No           | ns          | 0.9124           |    |        |    |
| 18                                 |                                                               |            |                     |              |             |                  |    |        |    |
| 19                                 | 110                                                           |            |                     |              |             |                  |    |        |    |
| 20                                 | LL vs. SP                                                     | -0.04856   | -0.1389 to 0.04179  | No           | ns          | 0.4012           |    |        |    |
| 21                                 | LL vs. SPLL                                                   | 0.1416     | 0.05126 to 0.232    | Yes          | **          | 0.0012           |    |        |    |
| 22                                 | SP vs. SPLL                                                   | 0.1902     | 0.09982 to 0.2805   | Yes          | ****        | <0.0001          |    |        |    |
| 23                                 |                                                               |            |                     |              |             |                  |    |        |    |
| 24                                 |                                                               |            |                     |              |             |                  |    |        |    |
| 25                                 | Test details                                                  | Mean 1     | Mean 2              | Mean Diff.   | SE of diff. | N1               | N2 | q      | DF |
| 26                                 |                                                               |            |                     |              |             |                  |    |        |    |
| 27                                 | 68                                                            |            |                     |              |             |                  |    |        |    |
| 28                                 | LL vs. SP                                                     | 1.29       | 1.278               | 0.01239      | 0.03728     | 6                | 6  | 0.4698 | 45 |
| 29                                 | LL vs. SPLL                                                   | 1.29       | 1.395               | -0.1048      | 0.03728     | 6                | 6  | 3.976  | 45 |
| 30                                 | SP vs. SPLL                                                   | 1.278      | 1.395               | -0.1172      | 0.03728     | 6                | 6  | 4.446  | 45 |

| 2way ANOVA<br>Multiple comparisons |             |       |       |           |         |   |   |        |    |
|------------------------------------|-------------|-------|-------|-----------|---------|---|---|--------|----|
| 31                                 |             |       |       |           |         |   |   |        |    |
| 32                                 | 89          |       |       |           |         |   |   |        |    |
| 33                                 | LL vs. SP   | 1.252 | 1.259 | -0.006284 | 0.03728 | 6 | 6 | 0.2384 | 45 |
| 34                                 | LL vs. SPLL | 1.252 | 1.243 | 0.008936  | 0.03728 | 6 | 6 | 0.339  | 45 |
| 35                                 | SP vs. SPLL | 1.259 | 1.243 | 0.01522   | 0.03728 | 6 | 6 | 0.5774 | 45 |
| 36                                 |             |       |       |           |         |   |   |        |    |
| 37                                 | 110         |       |       |           |         |   |   |        |    |
| 38                                 | LL vs. SP   | 1.252 | 1.301 | -0.04856  | 0.03728 | 6 | 6 | 1.842  | 45 |
| 39                                 | LL vs. SPLL | 1.252 | 1.111 | 0.1416    | 0.03728 | 6 | 6 | 5.372  | 45 |
| 40                                 | SP vs. SPLL | 1.301 | 1.111 | 0.1902    | 0.03728 | 6 | 6 | 7.214  | 45 |
