# Supplementary material for: RNA profiling identifies novel, photoperiod-history dependent markers associated with enhanced saltwater performance in juvenile Atlantic salmon
Source: PubMed Central journal article supplement (PMC7141700; doi:10.1371/journal.pone.0227496), 2020-04-08
Supplement: pone.0227496.s006.pdf [file pone.0227496.s006.pdf]

**Experiment 2**

| FW  |      | Weight (g) |           |           |           | Condition factor |          |          |           |
|-----|------|------------|-----------|-----------|-----------|------------------|----------|----------|-----------|
| Day |      | 2WSP       | 4WSP      | 8WSP      | SPC       | 2WSP             | 4WSP     | 8WSP     | SPC       |
| 1   | Mean | 40.33      | -         | -         | -         | 1.238921         | -        | -        | -         |
|     | N    | 10         | -         | -         | -         | 10               | -        | -        | -         |
|     | SD   | 9.682751   | -         | -         | -         | 0.224363         | -        | -        | -         |
| 15  | Mean | 37.7       | -         | -         | 39.6      | 1.173656         | -        | -        | 1.230874  |
|     | N    | 10         | -         | -         | 10        | 10               | -        | -        | 10        |
|     | SD   | 7.513691   | -         | -         | 3.95671   | 0.044211         | -        | -        | 0.064401  |
| 29  | Mean | -          | 42.85     | -         | 38.5      | -                | 1.219059 | -        | 1.191846  |
|     | N    | -          | 10        | -         | 10        | -                | 10       | -        | 10        |
|     | SD   | -          | 5.7399671 | -         | 7.666667  | -                | 0.033448 | -        | 0.050016  |
| 43  | Mean | 40.15      | -         | -         | 39.7      | 1.156269         | -        | -        | 1.222724  |
|     | N    | -          | -         | -         | 10        | 10               | -        | -        | 10        |
|     | SD   | 7.3938788  | -         | -         | 5.652925  | 0.114153         | -        | -        | 0.059581  |
| 58  | Mean | -          | 55.4      | 52.35     | 44.25     | -                | 1.242293 | 1.194456 | 1.186525  |
|     | N    | -          | 10        | 10        | 10        | -                | 10       | 10       | 10        |
|     | SD   | -          | 6.5226102 | 6.5066206 | 4.3092278 | -                | 0.077991 | 0.052454 | 0.085887  |
| 71  | Mean | 63.9       | -         | -         | 52.45     | 1.247538         | -        | -        | 1.326445  |
|     | N    | -          | -         | -         | 10        | 10               | -        | -        | 10        |
|     | SD   | 11.117554  | -         | -         | 5.40807   | 0.074836         | -        | -        | 0.041075  |
| 86  | Mean | -          | 66.6      | 54.2      | 52.8      | -                | 1.183827 | 1.190506 | 1.247698  |
|     | N    | -          | 10        | 10        | 10        | -                | 10       | 10       | 10        |
|     | SD   | -          | 10.107203 | 7.6055535 | 10.163114 | -                | 0.038288 | 0.021213 | 0.032843  |
| 113 | Mean | -          | -         | 74.65     | 65.55     | -                | -        | 1.217498 | 1.2653336 |
|     | N    | -          | -         | 10        | 10        | -                | -        | 10       | 10        |
|     | SD   | -          | -         | 14.431928 | 11.129166 | -                | -        | 0.070139 | 0.073543  |

I

**Experiment 2**

| SW  |      | Weight (g) |          |          | Condition factor |          |          |
|-----|------|------------|----------|----------|------------------|----------|----------|
| Day |      | 2WSP       | 4WSP     | 8WSP     | 2WSP             | 4WSP     | 8WSP     |
| 71  | Mean | 67.16667   | -        | -        | 1.275637         | -        | -        |
|     | N    | 30         | -        | -        | 30               | -        | -        |
|     | SD   | 10.89712   | -        | -        | 0.0508           | -        | -        |
| 86  | Mean | 68.82759   | 69.4     | -        | 1.205494         | 1.25668  | -        |
|     | N    | 29         | 30       | -        | 29               | 30       | -        |
|     | SD   | 11.55907   | 8.680537 | -        | 0.150763         | 0.05041  | -        |
| 100 | Mean | 70.63333   | 73.8     | -        | 1.186437         | 1.214933 | -        |
|     | N    | 30         | 30       | -        | 30               | 30       | -        |
|     | SD   | 11.37142   | 10.23483 | -        | 0.05927          | 0.062442 | -        |
| 113 | Mean | -          | 83.01667 | 73.9     | -                | 1.236895 | 1.216394 |
|     | N    | -          | 30       | 30       | -                | 30       | 30       |
|     | SD   | -          | 12.50344 | 11.76157 | -                | 0.056315 | 0.041986 |
| 128 | Mean | -          | -        | 80.75    | -                | -        | 1.173613 |
|     | N    | -          | -        | 30       | -                | -        | 30       |
|     | SD   | -          | -        | 12.45457 | -                | -        | 0.049847 |
| 142 | Mean | -          | -        | 94.06667 | -                | -        | 1.180716 |
|     | N    | -          | -        | 30       | -                | -        | 30       |
|     | SD   | -          | -        | 15.12177 | -                | -        | 0.050576 |

| 2way ANOVA<br>Tabular results |                          |                          |         |                 |                     |          |
|-------------------------------|--------------------------|--------------------------|---------|-----------------|---------------------|----------|
| 1                             | Table Analyzed           | Weight FW grouped format |         |                 |                     |          |
| 2                             |                          |                          |         |                 |                     |          |
| 3                             | Two-way ANOVA            | Ordinary                 |         |                 |                     |          |
| 4                             | Alpha                    | 0.05                     |         |                 |                     |          |
| 5                             |                          |                          |         |                 |                     |          |
| 6                             | Source of Variation      | % of total variation     | P value | P value summary | Significant?        |          |
| 7                             | Interaction              | 3.637                    | 0.0835  | ns              | No                  |          |
| 8                             | Treatment                | 48.66                    | <0.0001 | ****            | Yes                 |          |
| 9                             | Pretreatment             | 13.15                    | <0.0001 | ****            | Yes                 |          |
| 10                            |                          |                          |         |                 |                     |          |
| 11                            | ANOVA table              | SS                       | DF      | MS              | F (DFn, DFd)        | P value  |
| 12                            | Interaction              | 1160                     | 10      | 116             | F (10, 162) = 1.705 | P=0.0835 |
| 13                            | Treatment                | 15515                    | 5       | 3103            | F (5, 162) = 45.63  | P<0.0001 |
| 14                            | Pretreatment             | 4194                     | 2       | 2097            | F (2, 162) = 30.84  | P<0.0001 |
| 15                            | Residual                 | 11016                    | 162     | 68              |                     |          |
| 16                            |                          |                          |         |                 |                     |          |
| 17                            | Number of missing values | 0                        |         |                 |                     |          |

| 2way ANOVA<br>Multiple comparisons |                                                                    |            |                    |              |         |                  |  |
|------------------------------------|--------------------------------------------------------------------|------------|--------------------|--------------|---------|------------------|--|
| 1                                  | Compare cell means regardless of rows and columns                  |            |                    |              |         |                  |  |
| 2                                  |                                                                    |            |                    |              |         |                  |  |
| 3                                  | Number of families                                                 | 1          |                    |              |         |                  |  |
| 4                                  | Number of comparisons per family                                   | 153        |                    |              |         |                  |  |
| 5                                  | Alpha                                                              | 0.05       |                    |              |         |                  |  |
| 6                                  |                                                                    |            |                    |              |         |                  |  |
| 7                                  | Tukey's multiple comparisons test                                  | Mean Diff. | 95.00% CI of diff. | Significant? | Summary | Adjusted P Value |  |
| 8                                  |                                                                    |            |                    |              |         |                  |  |
| 9                                  | First long day:2 week winter vs. First long day:4 week winter      | -5.15      | -18.23 to 7.927    | No           | ns      | 0.9952           |  |
| 10                                 | First long day:2 week winter vs. First long day:8 week winter      | -14.65     | -27.73 to -1.573   | Yes          | *       | 0.0124           |  |
| 11                                 | First long day:2 week winter vs. 4 weeks post winter:2 week winter | -2.45      | -15.53 to 10.63    | No           | ns      | >0.9999          |  |
| 12                                 | First long day:2 week winter vs. 4 weeks post winter:4 week winter | -17.7      | -30.78 to -4.623   | Yes          | ***     | 0.0005           |  |
| 13                                 | First long day:2 week winter vs. 4 weeks post winter:8 week winter | -16.5      | -29.58 to -3.423   | Yes          | **      | 0.0019           |  |
| 14                                 | First long day:2 week winter vs. 8 weeks post winter:2 week winter | -26.2      | -39.28 to -13.12   | Yes          | ****    | <0.0001          |  |
| 15                                 | First long day:2 week winter vs. 8 weeks post winter:4 week winter | -28.9      | -41.98 to -15.82   | Yes          | ****    | <0.0001          |  |
| 16                                 | First long day:2 week winter vs. 8 weeks post winter:8 week winter | -36.95     | -50.03 to -23.87   | Yes          | ****    | <0.0001          |  |
| 17                                 | First long day:2 week winter vs. SPC -first long day:2 week winter | -1.9       | -14.98 to 11.18    | No           | ns      | >0.9999          |  |
| 18                                 | First long day:2 week winter vs. SPC -first long day:4 week winter | -0.8       | -13.88 to 12.28    | No           | ns      | >0.9999          |  |
| 19                                 | First long day:2 week winter vs. SPC -first long day:8 week winter | -6.55      | -19.63 to 6.527    | No           | ns      | 0.9469           |  |
| 20                                 | First long day:2 week winter vs. SPC -4 weeks post:2 week winter   | -2         | -15.08 to 11.08    | No           | ns      | >0.9999          |  |
| 21                                 | First long day:2 week winter vs. SPC -4 weeks post:4 week winter   | -6.55      | -19.63 to 6.527    | No           | ns      | 0.9469           |  |
| 22                                 | First long day:2 week winter vs. SPC -4 weeks post:8 week winter   | -15.1      | -28.18 to -2.023   | Yes          | **      | 0.0080           |  |
| 23                                 | First long day:2 week winter vs. SPC -8 weeks post:2 week winter   | -14.75     | -27.83 to -1.673   | Yes          | *       | 0.0113           |  |
| 24                                 | First long day:2 week winter vs. SPC -8 weeks post:4 week winter   | -15.1      | -28.18 to -2.023   | Yes          | **      | 0.0080           |  |
| 25                                 | First long day:2 week winter vs. SPC -8 weeks post:8 week winter   | -27.85     | -40.93 to -14.77   | Yes          | ****    | <0.0001          |  |
| 26                                 | First long day:4 week winter vs. First long day:8 week winter      | -9.5       | -22.58 to 3.577    | No           | ns      | 0.4774           |  |
| 27                                 | First long day:4 week winter vs. 4 weeks post winter:2 week winter | 2.7        | -10.38 to 15.78    | No           | ns      | >0.9999          |  |
| 28                                 | First long day:4 week winter vs. 4 weeks post winter:4 week winter | -12.55     | -25.63 to 0.5275   | No           | ns      | 0.0760           |  |
| 29                                 | First long day:4 week winter vs. 4 weeks post winter:8 week winter | -11.35     | -24.43 to 1.727    | No           | ns      | 0.1779           |  |
| 30                                 | First long day:4 week winter vs. 8 weeks post winter:2 week winter | -21.05     | -34.13 to -7.973   | Yes          | ****    | <0.0001          |  |

| 2way ANOVA<br>Multiple comparisons |                                                                         |        |                   |     |      |         |  |
|------------------------------------|-------------------------------------------------------------------------|--------|-------------------|-----|------|---------|--|
| 31                                 | First long day:4 week winter vs. 8 weeks post winter:4 week winter      | -23.75 | -36.83 to -10.67  | Yes | **** | <0.0001 |  |
| 32                                 | First long day:4 week winter vs. 8 weeks post winter:8 week winter      | -31.8  | -44.88 to -18.72  | Yes | **** | <0.0001 |  |
| 33                                 | First long day:4 week winter vs. SPC -first long day:2 week winter      | 3.25   | -9.827 to 16.33   | No  | ns   | >0.9999 |  |
| 34                                 | First long day:4 week winter vs. SPC -first long day:4 week winter      | 4.35   | -8.727 to 17.43   | No  | ns   | 0.9994  |  |
| 35                                 | First long day:4 week winter vs. SPC -first long day:8 week winter      | -1.4   | -14.48 to 11.68   | No  | ns   | >0.9999 |  |
| 36                                 | First long day:4 week winter vs. SPC -4 weeks post:2 week winter        | 3.15   | -9.927 to 16.23   | No  | ns   | >0.9999 |  |
| 37                                 | First long day:4 week winter vs. SPC -4 weeks post:4 week winter        | -1.4   | -14.48 to 11.68   | No  | ns   | >0.9999 |  |
| 38                                 | First long day:4 week winter vs. SPC -4 weeks post:8 week winter        | -9.95  | -23.03 to 3.127   | No  | ns   | 0.3905  |  |
| 39                                 | First long day:4 week winter vs. SPC -8 weeks post:2 week winter        | -9.6   | -22.68 to 3.477   | No  | ns   | 0.4576  |  |
| 40                                 | First long day:4 week winter vs. SPC -8 weeks post:4 week winter        | -9.95  | -23.03 to 3.127   | No  | ns   | 0.3905  |  |
| 41                                 | First long day:4 week winter vs. SPC -8 weeks post:8 week winter        | -22.7  | -35.78 to -9.623  | Yes | **** | <0.0001 |  |
| 42                                 | First long day:8 week winter vs. 4 weeks post winter:2 week winter      | 12.2   | -0.8775 to 25.28  | No  | ns   | 0.0989  |  |
| 43                                 | First long day:8 week winter vs. 4 weeks post winter:4 week winter      | -3.05  | -16.13 to 10.03   | No  | ns   | >0.9999 |  |
| 44                                 | First long day:8 week winter vs. 4 weeks post winter:8 week winter      | -1.85  | -14.93 to 11.23   | No  | ns   | >0.9999 |  |
| 45                                 | First long day:8 week winter vs. 8 weeks post winter:2 week winter      | -11.55 | -24.63 to 1.527   | No  | ns   | 0.1560  |  |
| 46                                 | First long day:8 week winter vs. 8 weeks post winter:4 week winter      | -14.25 | -27.33 to -1.173  | Yes | *    | 0.0180  |  |
| 47                                 | First long day:8 week winter vs. 8 weeks post winter:8 week winter      | -22.3  | -35.38 to -9.223  | Yes | **** | <0.0001 |  |
| 48                                 | First long day:8 week winter vs. SPC -first long day:2 week winter      | 12.75  | -0.3275 to 25.83  | No  | ns   | 0.0651  |  |
| 49                                 | First long day:8 week winter vs. SPC -first long day:4 week winter      | 13.85  | 0.7725 to 26.93   | Yes | *    | 0.0259  |  |
| 50                                 | First long day:8 week winter vs. SPC -first long day:8 week winter      | 8.1    | -4.977 to 21.18   | No  | ns   | 0.7530  |  |
| 51                                 | First long day:8 week winter vs. SPC -4 weeks post:2 week winter        | 12.65  | -0.4275 to 25.73  | No  | ns   | 0.0704  |  |
| 52                                 | First long day:8 week winter vs. SPC -4 weeks post:4 week winter        | 8.1    | -4.977 to 21.18   | No  | ns   | 0.7530  |  |
| 53                                 | First long day:8 week winter vs. SPC -4 weeks post:8 week winter        | -0.45  | -13.53 to 12.63   | No  | ns   | >0.9999 |  |
| 54                                 | First long day:8 week winter vs. SPC -8 weeks post:2 week winter        | -0.1   | -13.18 to 12.98   | No  | ns   | >0.9999 |  |
| 55                                 | First long day:8 week winter vs. SPC -8 weeks post:4 week winter        | -0.45  | -13.53 to 12.63   | No  | ns   | >0.9999 |  |
| 56                                 | First long day:8 week winter vs. SPC -8 weeks post:8 week winter        | -13.2  | -26.28 to -0.1225 | Yes | *    | 0.0452  |  |
| 57                                 | 4 weeks post winter:2 week winter vs. 4 weeks post winter:4 week winter | -15.25 | -28.33 to -2.173  | Yes | **   | 0.0069  |  |
| 58                                 | 4 weeks post winter:2 week winter vs. 4 weeks post winter:8 week winter | -14.05 | -27.13 to -0.9725 | Yes | *    | 0.0216  |  |
| 59                                 | 4 weeks post winter:2 week winter vs. 8 weeks post winter:2 week winter | -23.75 | -36.83 to -10.67  | Yes | **** | <0.0001 |  |
| 60                                 | 4 weeks post winter:2 week winter vs. 8 weeks post winter:4 week winter | -26.45 | -39.53 to -13.37  | Yes | **** | <0.0001 |  |

| 2way ANOVA<br>Multiple comparisons |                                                                         |        |                  |     |      |         |  |
|------------------------------------|-------------------------------------------------------------------------|--------|------------------|-----|------|---------|--|
| 61                                 | 4 weeks post winter:2 week winter vs. 8 weeks post winter:8 week winter | -34.5  | -47.58 to -21.42 | Yes | **** | <0.0001 |  |
| 62                                 | 4 weeks post winter:2 week winter vs. SPC -first long day:2 week winter | 0.55   | -12.53 to 13.63  | No  | ns   | >0.9999 |  |
| 63                                 | 4 weeks post winter:2 week winter vs. SPC -first long day:4 week winter | 1.65   | -11.43 to 14.73  | No  | ns   | >0.9999 |  |
| 64                                 | 4 weeks post winter:2 week winter vs. SPC -first long day:8 week winter | -4.1   | -17.18 to 8.977  | No  | ns   | 0.9997  |  |
| 65                                 | 4 weeks post winter:2 week winter vs. SPC -4 weeks post:2 week winter   | 0.45   | -12.63 to 13.53  | No  | ns   | >0.9999 |  |
| 66                                 | 4 weeks post winter:2 week winter vs. SPC -4 weeks post:4 week winter   | -4.1   | -17.18 to 8.977  | No  | ns   | 0.9997  |  |
| 67                                 | 4 weeks post winter:2 week winter vs. SPC -4 weeks post:8 week winter   | -12.65 | -25.73 to 0.4275 | No  | ns   | 0.0704  |  |
| 68                                 | 4 weeks post winter:2 week winter vs. SPC -8 weeks post:2 week winter   | -12.3  | -25.38 to 0.7775 | No  | ns   | 0.0919  |  |
| 69                                 | 4 weeks post winter:2 week winter vs. SPC -8 weeks post:4 week winter   | -12.65 | -25.73 to 0.4275 | No  | ns   | 0.0704  |  |
| 70                                 | 4 weeks post winter:2 week winter vs. SPC -8 weeks post:8 week winter   | -25.4  | -38.48 to -12.32 | Yes | **** | <0.0001 |  |
| 71                                 | 4 weeks post winter:4 week winter vs. 4 weeks post winter:8 week winter | 1.2    | -11.88 to 14.28  | No  | ns   | >0.9999 |  |
| 72                                 | 4 weeks post winter:4 week winter vs. 8 weeks post winter:2 week winter | -8.5   | -21.58 to 4.577  | No  | ns   | 0.6786  |  |
| 73                                 | 4 weeks post winter:4 week winter vs. 8 weeks post winter:4 week winter | -11.2  | -24.28 to 1.877  | No  | ns   | 0.1957  |  |
| 74                                 | 4 weeks post winter:4 week winter vs. 8 weeks post winter:8 week winter | -19.25 | -32.33 to -6.173 | Yes | **** | <0.0001 |  |
| 75                                 | 4 weeks post winter:4 week winter vs. SPC -first long day:2 week winter | 15.8   | 2.723 to 28.88   | Yes | **   | 0.0040  |  |
| 76                                 | 4 weeks post winter:4 week winter vs. SPC -first long day:4 week winter | 16.9   | 3.823 to 29.98   | Yes | **   | 0.0012  |  |
| 77                                 | 4 weeks post winter:4 week winter vs. SPC -first long day:8 week winter | 11.15  | -1.927 to 24.23  | No  | ns   | 0.2019  |  |
| 78                                 | 4 weeks post winter:4 week winter vs. SPC -4 weeks post:2 week winter   | 15.7   | 2.623 to 28.78   | Yes | **   | 0.0044  |  |
| 79                                 | 4 weeks post winter:4 week winter vs. SPC -4 weeks post:4 week winter   | 11.15  | -1.927 to 24.23  | No  | ns   | 0.2019  |  |
| 80                                 | 4 weeks post winter:4 week winter vs. SPC -4 weeks post:8 week winter   | 2.6    | -10.48 to 15.68  | No  | ns   | >0.9999 |  |
| 81                                 | 4 weeks post winter:4 week winter vs. SPC -8 weeks post:2 week winter   | 2.95   | -10.13 to 16.03  | No  | ns   | >0.9999 |  |
| 82                                 | 4 weeks post winter:4 week winter vs. SPC -8 weeks post:4 week winter   | 2.6    | -10.48 to 15.68  | No  | ns   | >0.9999 |  |
| 83                                 | 4 weeks post winter:4 week winter vs. SPC -8 weeks post:8 week winter   | -10.15 | -23.23 to 2.927  | No  | ns   | 0.3542  |  |
| 84                                 | 4 weeks post winter:8 week winter vs. 8 weeks post winter:2 week winter | -9.7   | -22.78 to 3.377  | No  | ns   | 0.4380  |  |
| 85                                 | 4 weeks post winter:8 week winter vs. 8 weeks post winter:4 week winter | -12.4  | -25.48 to 0.6775 | No  | ns   | 0.0852  |  |
| 86                                 | 4 weeks post winter:8 week winter vs. 8 weeks post winter:8 week winter | -20.45 | -33.53 to -7.373 | Yes | **** | <0.0001 |  |
| 87                                 | 4 weeks post winter:8 week winter vs. SPC -first long day:2 week winter | 14.6   | 1.523 to 27.68   | Yes | *    | 0.0130  |  |
| 88                                 | 4 weeks post winter:8 week winter vs. SPC -first long day:4 week winter | 15.7   | 2.623 to 28.78   | Yes | **   | 0.0044  |  |
| 89                                 | 4 weeks post winter:8 week winter vs. SPC -first long day:8 week winter | 9.95   | -3.127 to 23.03  | No  | ns   | 0.3905  |  |
| 90                                 | 4 weeks post winter:8 week winter vs. SPC -4 weeks post:2 week winter   | 14.5   | 1.423 to 27.58   | Yes | *    | 0.0143  |  |

| 2way ANOVA<br>Multiple comparisons |                                                                         |        |                 |     |      |         |  |
|------------------------------------|-------------------------------------------------------------------------|--------|-----------------|-----|------|---------|--|
| 91                                 | 4 weeks post winter:8 week winter vs. SPC -4 weeks post:4 week winter   | 9.95   | -3.127 to 23.03 | No  | ns   | 0.3905  |  |
| 92                                 | 4 weeks post winter:8 week winter vs. SPC -4 weeks post:8 week winter   | 1.4    | -11.68 to 14.48 | No  | ns   | >0.9999 |  |
| 93                                 | 4 weeks post winter:8 week winter vs. SPC -8 weeks post:2 week winter   | 1.75   | -11.33 to 14.83 | No  | ns   | >0.9999 |  |
| 94                                 | 4 weeks post winter:8 week winter vs. SPC -8 weeks post:4 week winter   | 1.4    | -11.68 to 14.48 | No  | ns   | >0.9999 |  |
| 95                                 | 4 weeks post winter:8 week winter vs. SPC -8 weeks post:8 week winter   | -11.35 | -24.43 to 1.727 | No  | ns   | 0.1779  |  |
| 96                                 | 8 weeks post winter:2 week winter vs. 8 weeks post winter:4 week winter | -2.7   | -15.78 to 10.38 | No  | ns   | >0.9999 |  |
| 97                                 | 8 weeks post winter:2 week winter vs. 8 weeks post winter:8 week winter | -10.75 | -23.83 to 2.327 | No  | ns   | 0.2564  |  |
| 98                                 | 8 weeks post winter:2 week winter vs. SPC -first long day:2 week winter | 24.3   | 11.22 to 37.38  | Yes | **** | <0.0001 |  |
| 99                                 | 8 weeks post winter:2 week winter vs. SPC -first long day:4 week winter | 25.4   | 12.32 to 38.48  | Yes | **** | <0.0001 |  |
| 100                                | 8 weeks post winter:2 week winter vs. SPC -first long day:8 week winter | 19.65  | 6.573 to 32.73  | Yes | **** | <0.0001 |  |
| 101                                | 8 weeks post winter:2 week winter vs. SPC -4 weeks post:2 week winter   | 24.2   | 11.12 to 37.28  | Yes | **** | <0.0001 |  |
| 102                                | 8 weeks post winter:2 week winter vs. SPC -4 weeks post:4 week winter   | 19.65  | 6.573 to 32.73  | Yes | **** | <0.0001 |  |
| 103                                | 8 weeks post winter:2 week winter vs. SPC -4 weeks post:8 week winter   | 11.1   | -1.977 to 24.18 | No  | ns   | 0.2082  |  |
| 104                                | 8 weeks post winter:2 week winter vs. SPC -8 weeks post:2 week winter   | 11.45  | -1.627 to 24.53 | No  | ns   | 0.1667  |  |
| 105                                | 8 weeks post winter:2 week winter vs. SPC -8 weeks post:4 week winter   | 11.1   | -1.977 to 24.18 | No  | ns   | 0.2082  |  |
| 106                                | 8 weeks post winter:2 week winter vs. SPC -8 weeks post:8 week winter   | -1.65  | -14.73 to 11.43 | No  | ns   | >0.9999 |  |
| 107                                | 8 weeks post winter:4 week winter vs. 8 weeks post winter:8 week winter | -8.05  | -21.13 to 5.027 | No  | ns   | 0.7618  |  |
| 108                                | 8 weeks post winter:4 week winter vs. SPC -first long day:2 week winter | 27     | 13.92 to 40.08  | Yes | **** | <0.0001 |  |
| 109                                | 8 weeks post winter:4 week winter vs. SPC -first long day:4 week winter | 28.1   | 15.02 to 41.18  | Yes | **** | <0.0001 |  |
| 110                                | 8 weeks post winter:4 week winter vs. SPC -first long day:8 week winter | 22.35  | 9.273 to 35.43  | Yes | **** | <0.0001 |  |
| 111                                | 8 weeks post winter:4 week winter vs. SPC -4 weeks post:2 week winter   | 26.9   | 13.82 to 39.98  | Yes | **** | <0.0001 |  |
| 112                                | 8 weeks post winter:4 week winter vs. SPC -4 weeks post:4 week winter   | 22.35  | 9.273 to 35.43  | Yes | **** | <0.0001 |  |
| 113                                | 8 weeks post winter:4 week winter vs. SPC -4 weeks post:8 week winter   | 13.8   | 0.7225 to 26.88 | Yes | *    | 0.0270  |  |
| 114                                | 8 weeks post winter:4 week winter vs. SPC -8 weeks post:2 week winter   | 14.15  | 1.073 to 27.23  | Yes | *    | 0.0197  |  |
| 115                                | 8 weeks post winter:4 week winter vs. SPC -8 weeks post:4 week winter   | 13.8   | 0.7225 to 26.88 | Yes | *    | 0.0270  |  |
| 116                                | 8 weeks post winter:4 week winter vs. SPC -8 weeks post:8 week winter   | 1.05   | -12.03 to 14.13 | No  | ns   | >0.9999 |  |
| 117                                | 8 weeks post winter:8 week winter vs. SPC -first long day:2 week winter | 35.05  | 21.97 to 48.13  | Yes | **** | <0.0001 |  |
| 118                                | 8 weeks post winter:8 week winter vs. SPC -first long day:4 week winter | 36.15  | 23.07 to 49.23  | Yes | **** | <0.0001 |  |
| 119                                | 8 weeks post winter:8 week winter vs. SPC -first long day:8 week winter | 30.4   | 17.32 to 43.48  | Yes | **** | <0.0001 |  |
| 120                                | 8 weeks post winter:8 week winter vs. SPC -4 weeks post:2 week winter   | 34.95  | 21.87 to 48.03  | Yes | **** | <0.0001 |  |



| 2way ANOVA<br>Multiple comparisons |                                                                         |        |                   |     |      |         |  |
|------------------------------------|-------------------------------------------------------------------------|--------|-------------------|-----|------|---------|--|
| 121                                | 8 weeks post winter:8 week winter vs. SPC -4 weeks post:4 week winter   | 30.4   | 17.32 to 43.48    | Yes | **** | <0.0001 |  |
| 122                                | 8 weeks post winter:8 week winter vs. SPC -4 weeks post:8 week winter   | 21.85  | 8.773 to 34.93    | Yes | **** | <0.0001 |  |
| 123                                | 8 weeks post winter:8 week winter vs. SPC -8 weeks post:2 week winter   | 22.2   | 9.123 to 35.28    | Yes | **** | <0.0001 |  |
| 124                                | 8 weeks post winter:8 week winter vs. SPC -8 weeks post:4 week winter   | 21.85  | 8.773 to 34.93    | Yes | **** | <0.0001 |  |
| 125                                | 8 weeks post winter:8 week winter vs. SPC -8 weeks post:8 week winter   | 9.1    | -3.977 to 22.18   | No  | ns   | 0.5583  |  |
| 126                                | SPC -first long day:2 week winter vs. SPC -first long day:4 week winter | 1.1    | -11.98 to 14.18   | No  | ns   | >0.9999 |  |
| 127                                | SPC -first long day:2 week winter vs. SPC -first long day:8 week winter | -4.65  | -17.73 to 8.427   | No  | ns   | 0.9986  |  |
| 128                                | SPC -first long day:2 week winter vs. SPC -4 weeks post:2 week winter   | -0.1   | -13.18 to 12.98   | No  | ns   | >0.9999 |  |
| 129                                | SPC -first long day:2 week winter vs. SPC -4 weeks post:4 week winter   | -4.65  | -17.73 to 8.427   | No  | ns   | 0.9986  |  |
| 130                                | SPC -first long day:2 week winter vs. SPC -4 weeks post:8 week winter   | -13.2  | -26.28 to -0.1225 | Yes | *    | 0.0452  |  |
| 131                                | SPC -first long day:2 week winter vs. SPC -8 weeks post:2 week winter   | -12.85 | -25.93 to 0.2275  | No  | ns   | 0.0601  |  |
| 132                                | SPC -first long day:2 week winter vs. SPC -8 weeks post:4 week winter   | -13.2  | -26.28 to -0.1225 | Yes | *    | 0.0452  |  |
| 133                                | SPC -first long day:2 week winter vs. SPC -8 weeks post:8 week winter   | -25.95 | -39.03 to -12.87  | Yes | **** | <0.0001 |  |
| 134                                | SPC -first long day:4 week winter vs. SPC -first long day:8 week winter | -5.75  | -18.83 to 7.327   | No  | ns   | 0.9844  |  |
| 135                                | SPC -first long day:4 week winter vs. SPC -4 weeks post:2 week winter   | -1.2   | -14.28 to 11.88   | No  | ns   | >0.9999 |  |
| 136                                | SPC -first long day:4 week winter vs. SPC -4 weeks post:4 week winter   | -5.75  | -18.83 to 7.327   | No  | ns   | 0.9844  |  |
| 137                                | SPC -first long day:4 week winter vs. SPC -4 weeks post:8 week winter   | -14.3  | -27.38 to -1.223  | Yes | *    | 0.0172  |  |
| 138                                | SPC -first long day:4 week winter vs. SPC -8 weeks post:2 week winter   | -13.95 | -27.03 to -0.8725 | Yes | *    | 0.0237  |  |
| 139                                | SPC -first long day:4 week winter vs. SPC -8 weeks post:4 week winter   | -14.3  | -27.38 to -1.223  | Yes | *    | 0.0172  |  |
| 140                                | SPC -first long day:4 week winter vs. SPC -8 weeks post:8 week winter   | -27.05 | -40.13 to -13.97  | Yes | **** | <0.0001 |  |
| 141                                | SPC -first long day:8 week winter vs. SPC -4 weeks post:2 week winter   | 4.55   | -8.527 to 17.63   | No  | ns   | 0.9989  |  |
| 142                                | SPC -first long day:8 week winter vs. SPC -4 weeks post:4 week winter   | 0      | -13.08 to 13.08   | No  | ns   | >0.9999 |  |
| 143                                | SPC -first long day:8 week winter vs. SPC -4 weeks post:8 week winter   | -8.55  | -21.63 to 4.527   | No  | ns   | 0.6688  |  |
| 144                                | SPC -first long day:8 week winter vs. SPC -8 weeks post:2 week winter   | -8.2   | -21.28 to 4.877   | No  | ns   | 0.7351  |  |
| 145                                | SPC -first long day:8 week winter vs. SPC -8 weeks post:4 week winter   | -8.55  | -21.63 to 4.527   | No  | ns   | 0.6688  |  |
| 146                                | SPC -first long day:8 week winter vs. SPC -8 weeks post:8 week winter   | -21.3  | -34.38 to -8.223  | Yes | **** | <0.0001 |  |
| 147                                | SPC -4 weeks post:2 week winter vs. SPC -4 weeks post:4 week winter     | -4.55  | -17.63 to 8.527   | No  | ns   | 0.9989  |  |
| 148                                | SPC -4 weeks post:2 week winter vs. SPC -4 weeks post:8 week winter     | -13.1  | -26.18 to -0.0225 | Yes | *    | 0.0491  |  |
| 149                                | SPC -4 weeks post:2 week winter vs. SPC -8 weeks post:2 week winter     | -12.75 | -25.83 to 0.3275  | No  | ns   | 0.0651  |  |
| 150                                | SPC -4 weeks post:2 week winter vs. SPC -8 weeks post:4 week winter     | -13.1  | -26.18 to -0.0225 | Yes | *    | 0.0491  |  |

| 2way ANOVA<br>Multiple comparisons |                                                                     |        |                   |            |             |         |    |
|------------------------------------|---------------------------------------------------------------------|--------|-------------------|------------|-------------|---------|----|
| 151                                | SPC -4 weeks post:2 week winter vs. SPC -8 weeks post:8 week winter | -25.85 | -38.93 to -12.77  | Yes        | ****        | <0.0001 |    |
| 152                                | SPC -4 weeks post:4 week winter vs. SPC -4 weeks post:8 week winter | -8.55  | -21.63 to 4.527   | No         | ns          | 0.6688  |    |
| 153                                | SPC -4 weeks post:4 week winter vs. SPC -8 weeks post:2 week winter | -8.2   | -21.28 to 4.877   | No         | ns          | 0.7351  |    |
| 154                                | SPC -4 weeks post:4 week winter vs. SPC -8 weeks post:4 week winter | -8.55  | -21.63 to 4.527   | No         | ns          | 0.6688  |    |
| 155                                | SPC -4 weeks post:4 week winter vs. SPC -8 weeks post:8 week winter | -21.3  | -34.38 to -8.223  | Yes        | ****        | <0.0001 |    |
| 156                                | SPC -4 weeks post:8 week winter vs. SPC -8 weeks post:2 week winter | 0.35   | -12.73 to 13.43   | No         | ns          | >0.9999 |    |
| 157                                | SPC -4 weeks post:8 week winter vs. SPC -8 weeks post:4 week winter | 0      | -13.08 to 13.08   | No         | ns          | >0.9999 |    |
| 158                                | SPC -4 weeks post:8 week winter vs. SPC -8 weeks post:8 week winter | -12.75 | -25.83 to 0.3275  | No         | ns          | 0.0651  |    |
| 159                                | SPC -8 weeks post:2 week winter vs. SPC -8 weeks post:4 week winter | -0.35  | -13.43 to 12.73   | No         | ns          | >0.9999 |    |
| 160                                | SPC -8 weeks post:2 week winter vs. SPC -8 weeks post:8 week winter | -13.1  | -26.18 to -0.0225 | Yes        | *           | 0.0491  |    |
| 161                                | SPC -8 weeks post:4 week winter vs. SPC -8 weeks post:8 week winter | -12.75 | -25.83 to 0.3275  | No         | ns          | 0.0651  |    |
| 162                                |                                                                     |        |                   |            |             |         |    |
| 163                                |                                                                     |        |                   |            |             |         |    |
| 164                                | Test details                                                        | Mean 1 | Mean 2            | Mean Diff. | SE of diff. | N1      | N2 |
| 165                                |                                                                     |        |                   |            |             |         |    |
| 166                                | First long day:2 week winter vs. First long day:4 week winter       | 37.7   | 42.85             | -5.15      | 3.688       | 10      | 10 |
| 167                                | First long day:2 week winter vs. First long day:8 week winter       | 37.7   | 52.35             | -14.65     | 3.688       | 10      | 10 |
| 168                                | First long day:2 week winter vs. 4 weeks post winter:2 week winter  | 37.7   | 40.15             | -2.45      | 3.688       | 10      | 10 |
| 169                                | First long day:2 week winter vs. 4 weeks post winter:4 week winter  | 37.7   | 55.4              | -17.7      | 3.688       | 10      | 10 |
| 170                                | First long day:2 week winter vs. 4 weeks post winter:8 week winter  | 37.7   | 54.2              | -16.5      | 3.688       | 10      | 10 |
| 171                                | First long day:2 week winter vs. 8 weeks post winter:2 week winter  | 37.7   | 63.9              | -26.2      | 3.688       | 10      | 10 |
| 172                                | First long day:2 week winter vs. 8 weeks post winter:4 week winter  | 37.7   | 66.6              | -28.9      | 3.688       | 10      | 10 |
| 173                                | First long day:2 week winter vs. 8 weeks post winter:8 week winter  | 37.7   | 74.65             | -36.95     | 3.688       | 10      | 10 |
| 174                                | First long day:2 week winter vs. SPC -first long day:2 week winter  | 37.7   | 39.6              | -1.9       | 3.688       | 10      | 10 |
| 175                                | First long day:2 week winter vs. SPC -first long day:4 week winter  | 37.7   | 38.5              | -0.8       | 3.688       | 10      | 10 |
| 176                                | First long day:2 week winter vs. SPC -first long day:8 week winter  | 37.7   | 44.25             | -6.55      | 3.688       | 10      | 10 |
| 177                                | First long day:2 week winter vs. SPC -4 weeks post:2 week winter    | 37.7   | 39.7              | -2         | 3.688       | 10      | 10 |
| 178                                | First long day:2 week winter vs. SPC -4 weeks post:4 week winter    | 37.7   | 44.25             | -6.55      | 3.688       | 10      | 10 |
| 179                                | First long day:2 week winter vs. SPC -4 weeks post:8 week winter    | 37.7   | 52.8              | -15.1      | 3.688       | 10      | 10 |
| 180                                | First long day:2 week winter vs. SPC -8 weeks post:2 week winter    | 37.7   | 52.45             | -14.75     | 3.688       | 10      | 10 |

| 2way ANOVA<br>Multiple comparisons |                                                                    |       |       |        |       |    |    |
|------------------------------------|--------------------------------------------------------------------|-------|-------|--------|-------|----|----|
| <b>181</b>                         | First long day:2 week winter vs. SPC -8 weeks post:4 week winter   | 37.7  | 52.8  | -15.1  | 3.688 | 10 | 10 |
| <b>182</b>                         | First long day:2 week winter vs. SPC -8 weeks post:8 week winter   | 37.7  | 65.55 | -27.85 | 3.688 | 10 | 10 |
| <b>183</b>                         | First long day:4 week winter vs. First long day:8 week winter      | 42.85 | 52.35 | -9.5   | 3.688 | 10 | 10 |
| <b>184</b>                         | First long day:4 week winter vs. 4 weeks post winter:2 week winter | 42.85 | 40.15 | 2.7    | 3.688 | 10 | 10 |
| <b>185</b>                         | First long day:4 week winter vs. 4 weeks post winter:4 week winter | 42.85 | 55.4  | -12.55 | 3.688 | 10 | 10 |
| <b>186</b>                         | First long day:4 week winter vs. 4 weeks post winter:8 week winter | 42.85 | 54.2  | -11.35 | 3.688 | 10 | 10 |
| <b>187</b>                         | First long day:4 week winter vs. 8 weeks post winter:2 week winter | 42.85 | 63.9  | -21.05 | 3.688 | 10 | 10 |
| <b>188</b>                         | First long day:4 week winter vs. 8 weeks post winter:4 week winter | 42.85 | 66.6  | -23.75 | 3.688 | 10 | 10 |
| <b>189</b>                         | First long day:4 week winter vs. 8 weeks post winter:8 week winter | 42.85 | 74.65 | -31.8  | 3.688 | 10 | 10 |
| <b>190</b>                         | First long day:4 week winter vs. SPC -first long day:2 week winter | 42.85 | 39.6  | 3.25   | 3.688 | 10 | 10 |
| <b>191</b>                         | First long day:4 week winter vs. SPC -first long day:4 week winter | 42.85 | 38.5  | 4.35   | 3.688 | 10 | 10 |
| <b>192</b>                         | First long day:4 week winter vs. SPC -first long day:8 week winter | 42.85 | 44.25 | -1.4   | 3.688 | 10 | 10 |
| <b>193</b>                         | First long day:4 week winter vs. SPC -4 weeks post:2 week winter   | 42.85 | 39.7  | 3.15   | 3.688 | 10 | 10 |
| <b>194</b>                         | First long day:4 week winter vs. SPC -4 weeks post:4 week winter   | 42.85 | 44.25 | -1.4   | 3.688 | 10 | 10 |
| <b>195</b>                         | First long day:4 week winter vs. SPC -4 weeks post:8 week winter   | 42.85 | 52.8  | -9.95  | 3.688 | 10 | 10 |
| <b>196</b>                         | First long day:4 week winter vs. SPC -8 weeks post:2 week winter   | 42.85 | 52.45 | -9.6   | 3.688 | 10 | 10 |
| <b>197</b>                         | First long day:4 week winter vs. SPC -8 weeks post:4 week winter   | 42.85 | 52.8  | -9.95  | 3.688 | 10 | 10 |
| <b>198</b>                         | First long day:4 week winter vs. SPC -8 weeks post:8 week winter   | 42.85 | 65.55 | -22.7  | 3.688 | 10 | 10 |
| <b>199</b>                         | First long day:8 week winter vs. 4 weeks post winter:2 week winter | 52.35 | 40.15 | 12.2   | 3.688 | 10 | 10 |
| <b>200</b>                         | First long day:8 week winter vs. 4 weeks post winter:4 week winter | 52.35 | 55.4  | -3.05  | 3.688 | 10 | 10 |
| <b>201</b>                         | First long day:8 week winter vs. 4 weeks post winter:8 week winter | 52.35 | 54.2  | -1.85  | 3.688 | 10 | 10 |
| <b>202</b>                         | First long day:8 week winter vs. 8 weeks post winter:2 week winter | 52.35 | 63.9  | -11.55 | 3.688 | 10 | 10 |
| <b>203</b>                         | First long day:8 week winter vs. 8 weeks post winter:4 week winter | 52.35 | 66.6  | -14.25 | 3.688 | 10 | 10 |
| <b>204</b>                         | First long day:8 week winter vs. 8 weeks post winter:8 week winter | 52.35 | 74.65 | -22.3  | 3.688 | 10 | 10 |
| <b>205</b>                         | First long day:8 week winter vs. SPC -first long day:2 week winter | 52.35 | 39.6  | 12.75  | 3.688 | 10 | 10 |
| <b>206</b>                         | First long day:8 week winter vs. SPC -first long day:4 week winter | 52.35 | 38.5  | 13.85  | 3.688 | 10 | 10 |
| <b>207</b>                         | First long day:8 week winter vs. SPC -first long day:8 week winter | 52.35 | 44.25 | 8.1    | 3.688 | 10 | 10 |
| <b>208</b>                         | First long day:8 week winter vs. SPC -4 weeks post:2 week winter   | 52.35 | 39.7  | 12.65  | 3.688 | 10 | 10 |
| <b>209</b>                         | First long day:8 week winter vs. SPC -4 weeks post:4 week winter   | 52.35 | 44.25 | 8.1    | 3.688 | 10 | 10 |
| <b>210</b>                         | First long day:8 week winter vs. SPC -4 weeks post:8 week winter   | 52.35 | 52.8  | -0.45  | 3.688 | 10 | 10 |

| 2way ANOVA<br>Multiple comparisons |                                                                         |       |       |        |       |    |    |
|------------------------------------|-------------------------------------------------------------------------|-------|-------|--------|-------|----|----|
| 211                                | First long day:8 week winter vs. SPC -8 weeks post:2 week winter        | 52.35 | 52.45 | -0.1   | 3.688 | 10 | 10 |
| 212                                | First long day:8 week winter vs. SPC -8 weeks post:4 week winter        | 52.35 | 52.8  | -0.45  | 3.688 | 10 | 10 |
| 213                                | First long day:8 week winter vs. SPC -8 weeks post:8 week winter        | 52.35 | 65.55 | -13.2  | 3.688 | 10 | 10 |
| 214                                | 4 weeks post winter:2 week winter vs. 4 weeks post winter:4 week winter | 40.15 | 55.4  | -15.25 | 3.688 | 10 | 10 |
| 215                                | 4 weeks post winter:2 week winter vs. 4 weeks post winter:8 week winter | 40.15 | 54.2  | -14.05 | 3.688 | 10 | 10 |
| 216                                | 4 weeks post winter:2 week winter vs. 8 weeks post winter:2 week winter | 40.15 | 63.9  | -23.75 | 3.688 | 10 | 10 |
| 217                                | 4 weeks post winter:2 week winter vs. 8 weeks post winter:4 week winter | 40.15 | 66.6  | -26.45 | 3.688 | 10 | 10 |
| 218                                | 4 weeks post winter:2 week winter vs. 8 weeks post winter:8 week winter | 40.15 | 74.65 | -34.5  | 3.688 | 10 | 10 |
| 219                                | 4 weeks post winter:2 week winter vs. SPC -first long day:2 week winter | 40.15 | 39.6  | 0.55   | 3.688 | 10 | 10 |
| 220                                | 4 weeks post winter:2 week winter vs. SPC -first long day:4 week winter | 40.15 | 38.5  | 1.65   | 3.688 | 10 | 10 |
| 221                                | 4 weeks post winter:2 week winter vs. SPC -first long day:8 week winter | 40.15 | 44.25 | -4.1   | 3.688 | 10 | 10 |
| 222                                | 4 weeks post winter:2 week winter vs. SPC -4 weeks post:2 week winter   | 40.15 | 39.7  | 0.45   | 3.688 | 10 | 10 |
| 223                                | 4 weeks post winter:2 week winter vs. SPC -4 weeks post:4 week winter   | 40.15 | 44.25 | -4.1   | 3.688 | 10 | 10 |
| 224                                | 4 weeks post winter:2 week winter vs. SPC -4 weeks post:8 week winter   | 40.15 | 52.8  | -12.65 | 3.688 | 10 | 10 |
| 225                                | 4 weeks post winter:2 week winter vs. SPC -8 weeks post:2 week winter   | 40.15 | 52.45 | -12.3  | 3.688 | 10 | 10 |
| 226                                | 4 weeks post winter:2 week winter vs. SPC -8 weeks post:4 week winter   | 40.15 | 52.8  | -12.65 | 3.688 | 10 | 10 |
| 227                                | 4 weeks post winter:2 week winter vs. SPC -8 weeks post:8 week winter   | 40.15 | 65.55 | -25.4  | 3.688 | 10 | 10 |
| 228                                | 4 weeks post winter:4 week winter vs. 4 weeks post winter:8 week winter | 55.4  | 54.2  | 1.2    | 3.688 | 10 | 10 |
| 229                                | 4 weeks post winter:4 week winter vs. 8 weeks post winter:2 week winter | 55.4  | 63.9  | -8.5   | 3.688 | 10 | 10 |
| 230                                | 4 weeks post winter:4 week winter vs. 8 weeks post winter:4 week winter | 55.4  | 66.6  | -11.2  | 3.688 | 10 | 10 |
| 231                                | 4 weeks post winter:4 week winter vs. 8 weeks post winter:8 week winter | 55.4  | 74.65 | -19.25 | 3.688 | 10 | 10 |
| 232                                | 4 weeks post winter:4 week winter vs. SPC -first long day:2 week winter | 55.4  | 39.6  | 15.8   | 3.688 | 10 | 10 |
| 233                                | 4 weeks post winter:4 week winter vs. SPC -first long day:4 week winter | 55.4  | 38.5  | 16.9   | 3.688 | 10 | 10 |
| 234                                | 4 weeks post winter:4 week winter vs. SPC -first long day:8 week winter | 55.4  | 44.25 | 11.15  | 3.688 | 10 | 10 |
| 235                                | 4 weeks post winter:4 week winter vs. SPC -4 weeks post:2 week winter   | 55.4  | 39.7  | 15.7   | 3.688 | 10 | 10 |
| 236                                | 4 weeks post winter:4 week winter vs. SPC -4 weeks post:4 week winter   | 55.4  | 44.25 | 11.15  | 3.688 | 10 | 10 |
| 237                                | 4 weeks post winter:4 week winter vs. SPC -4 weeks post:8 week winter   | 55.4  | 52.8  | 2.6    | 3.688 | 10 | 10 |
| 238                                | 4 weeks post winter:4 week winter vs. SPC -8 weeks post:2 week winter   | 55.4  | 52.45 | 2.95   | 3.688 | 10 | 10 |
| 239                                | 4 weeks post winter:4 week winter vs. SPC -8 weeks post:4 week winter   | 55.4  | 52.8  | 2.6    | 3.688 | 10 | 10 |
| 240                                | 4 weeks post winter:4 week winter vs. SPC -8 weeks post:8 week winter   | 55.4  | 65.55 | -10.15 | 3.688 | 10 | 10 |

| 2way ANOVA<br>Multiple comparisons |                                                                         |      |       |        |       |    |    |
|------------------------------------|-------------------------------------------------------------------------|------|-------|--------|-------|----|----|
| <b>241</b>                         | 4 weeks post winter:8 week winter vs. 8 weeks post winter:2 week winter | 54.2 | 63.9  | -9.7   | 3.688 | 10 | 10 |
| <b>242</b>                         | 4 weeks post winter:8 week winter vs. 8 weeks post winter:4 week winter | 54.2 | 66.6  | -12.4  | 3.688 | 10 | 10 |
| <b>243</b>                         | 4 weeks post winter:8 week winter vs. 8 weeks post winter:8 week winter | 54.2 | 74.65 | -20.45 | 3.688 | 10 | 10 |
| <b>244</b>                         | 4 weeks post winter:8 week winter vs. SPC -first long day:2 week winter | 54.2 | 39.6  | 14.6   | 3.688 | 10 | 10 |
| <b>245</b>                         | 4 weeks post winter:8 week winter vs. SPC -first long day:4 week winter | 54.2 | 38.5  | 15.7   | 3.688 | 10 | 10 |
| <b>246</b>                         | 4 weeks post winter:8 week winter vs. SPC -first long day:8 week winter | 54.2 | 44.25 | 9.95   | 3.688 | 10 | 10 |
| <b>247</b>                         | 4 weeks post winter:8 week winter vs. SPC -4 weeks post:2 week winter   | 54.2 | 39.7  | 14.5   | 3.688 | 10 | 10 |
| <b>248</b>                         | 4 weeks post winter:8 week winter vs. SPC -4 weeks post:4 week winter   | 54.2 | 44.25 | 9.95   | 3.688 | 10 | 10 |
| <b>249</b>                         | 4 weeks post winter:8 week winter vs. SPC -4 weeks post:8 week winter   | 54.2 | 52.8  | 1.4    | 3.688 | 10 | 10 |
| <b>250</b>                         | 4 weeks post winter:8 week winter vs. SPC -8 weeks post:2 week winter   | 54.2 | 52.45 | 1.75   | 3.688 | 10 | 10 |
| <b>251</b>                         | 4 weeks post winter:8 week winter vs. SPC -8 weeks post:4 week winter   | 54.2 | 52.8  | 1.4    | 3.688 | 10 | 10 |
| <b>252</b>                         | 4 weeks post winter:8 week winter vs. SPC -8 weeks post:8 week winter   | 54.2 | 65.55 | -11.35 | 3.688 | 10 | 10 |
| <b>253</b>                         | 8 weeks post winter:2 week winter vs. 8 weeks post winter:4 week winter | 63.9 | 66.6  | -2.7   | 3.688 | 10 | 10 |
| <b>254</b>                         | 8 weeks post winter:2 week winter vs. 8 weeks post winter:8 week winter | 63.9 | 74.65 | -10.75 | 3.688 | 10 | 10 |
| <b>255</b>                         | 8 weeks post winter:2 week winter vs. SPC -first long day:2 week winter | 63.9 | 39.6  | 24.3   | 3.688 | 10 | 10 |
| <b>256</b>                         | 8 weeks post winter:2 week winter vs. SPC -first long day:4 week winter | 63.9 | 38.5  | 25.4   | 3.688 | 10 | 10 |
| <b>257</b>                         | 8 weeks post winter:2 week winter vs. SPC -first long day:8 week winter | 63.9 | 44.25 | 19.65  | 3.688 | 10 | 10 |
| <b>258</b>                         | 8 weeks post winter:2 week winter vs. SPC -4 weeks post:2 week winter   | 63.9 | 39.7  | 24.2   | 3.688 | 10 | 10 |
| <b>259</b>                         | 8 weeks post winter:2 week winter vs. SPC -4 weeks post:4 week winter   | 63.9 | 44.25 | 19.65  | 3.688 | 10 | 10 |
| <b>260</b>                         | 8 weeks post winter:2 week winter vs. SPC -4 weeks post:8 week winter   | 63.9 | 52.8  | 11.1   | 3.688 | 10 | 10 |
| <b>261</b>                         | 8 weeks post winter:2 week winter vs. SPC -8 weeks post:2 week winter   | 63.9 | 52.45 | 11.45  | 3.688 | 10 | 10 |
| <b>262</b>                         | 8 weeks post winter:2 week winter vs. SPC -8 weeks post:4 week winter   | 63.9 | 52.8  | 11.1   | 3.688 | 10 | 10 |
| <b>263</b>                         | 8 weeks post winter:2 week winter vs. SPC -8 weeks post:8 week winter   | 63.9 | 65.55 | -1.65  | 3.688 | 10 | 10 |
| <b>264</b>                         | 8 weeks post winter:4 week winter vs. 8 weeks post winter:8 week winter | 66.6 | 74.65 | -8.05  | 3.688 | 10 | 10 |
| <b>265</b>                         | 8 weeks post winter:4 week winter vs. SPC -first long day:2 week winter | 66.6 | 39.6  | 27     | 3.688 | 10 | 10 |
| <b>266</b>                         | 8 weeks post winter:4 week winter vs. SPC -first long day:4 week winter | 66.6 | 38.5  | 28.1   | 3.688 | 10 | 10 |
| <b>267</b>                         | 8 weeks post winter:4 week winter vs. SPC -first long day:8 week winter | 66.6 | 44.25 | 22.35  | 3.688 | 10 | 10 |
| <b>268</b>                         | 8 weeks post winter:4 week winter vs. SPC -4 weeks post:2 week winter   | 66.6 | 39.7  | 26.9   | 3.688 | 10 | 10 |
| <b>269</b>                         | 8 weeks post winter:4 week winter vs. SPC -4 weeks post:4 week winter   | 66.6 | 44.25 | 22.35  | 3.688 | 10 | 10 |
| <b>270</b>                         | 8 weeks post winter:4 week winter vs. SPC -4 weeks post:8 week winter   | 66.6 | 52.8  | 13.8   | 3.688 | 10 | 10 |

| 2way ANOVA<br>Multiple comparisons |                                                                         |       |       |        |       |    |    |
|------------------------------------|-------------------------------------------------------------------------|-------|-------|--------|-------|----|----|
| <b>271</b>                         | 8 weeks post winter:4 week winter vs. SPC -8 weeks post:2 week winter   | 66.6  | 52.45 | 14.15  | 3.688 | 10 | 10 |
| <b>272</b>                         | 8 weeks post winter:4 week winter vs. SPC -8 weeks post:4 week winter   | 66.6  | 52.8  | 13.8   | 3.688 | 10 | 10 |
| <b>273</b>                         | 8 weeks post winter:4 week winter vs. SPC -8 weeks post:8 week winter   | 66.6  | 65.55 | 1.05   | 3.688 | 10 | 10 |
| <b>274</b>                         | 8 weeks post winter:8 week winter vs. SPC -first long day:2 week winter | 74.65 | 39.6  | 35.05  | 3.688 | 10 | 10 |
| <b>275</b>                         | 8 weeks post winter:8 week winter vs. SPC -first long day:4 week winter | 74.65 | 38.5  | 36.15  | 3.688 | 10 | 10 |
| <b>276</b>                         | 8 weeks post winter:8 week winter vs. SPC -first long day:8 week winter | 74.65 | 44.25 | 30.4   | 3.688 | 10 | 10 |
| <b>277</b>                         | 8 weeks post winter:8 week winter vs. SPC -4 weeks post:2 week winter   | 74.65 | 39.7  | 34.95  | 3.688 | 10 | 10 |
| <b>278</b>                         | 8 weeks post winter:8 week winter vs. SPC -4 weeks post:4 week winter   | 74.65 | 44.25 | 30.4   | 3.688 | 10 | 10 |
| <b>279</b>                         | 8 weeks post winter:8 week winter vs. SPC -4 weeks post:8 week winter   | 74.65 | 52.8  | 21.85  | 3.688 | 10 | 10 |
| <b>280</b>                         | 8 weeks post winter:8 week winter vs. SPC -8 weeks post:2 week winter   | 74.65 | 52.45 | 22.2   | 3.688 | 10 | 10 |
| <b>281</b>                         | 8 weeks post winter:8 week winter vs. SPC -8 weeks post:4 week winter   | 74.65 | 52.8  | 21.85  | 3.688 | 10 | 10 |
| <b>282</b>                         | 8 weeks post winter:8 week winter vs. SPC -8 weeks post:8 week winter   | 74.65 | 65.55 | 9.1    | 3.688 | 10 | 10 |
| <b>283</b>                         | SPC -first long day:2 week winter vs. SPC -first long day:4 week winter | 39.6  | 38.5  | 1.1    | 3.688 | 10 | 10 |
| <b>284</b>                         | SPC -first long day:2 week winter vs. SPC -first long day:8 week winter | 39.6  | 44.25 | -4.65  | 3.688 | 10 | 10 |
| <b>285</b>                         | SPC -first long day:2 week winter vs. SPC -4 weeks post:2 week winter   | 39.6  | 39.7  | -0.1   | 3.688 | 10 | 10 |
| <b>286</b>                         | SPC -first long day:2 week winter vs. SPC -4 weeks post:4 week winter   | 39.6  | 44.25 | -4.65  | 3.688 | 10 | 10 |
| <b>287</b>                         | SPC -first long day:2 week winter vs. SPC -4 weeks post:8 week winter   | 39.6  | 52.8  | -13.2  | 3.688 | 10 | 10 |
| <b>288</b>                         | SPC -first long day:2 week winter vs. SPC -8 weeks post:2 week winter   | 39.6  | 52.45 | -12.85 | 3.688 | 10 | 10 |
| <b>289</b>                         | SPC -first long day:2 week winter vs. SPC -8 weeks post:4 week winter   | 39.6  | 52.8  | -13.2  | 3.688 | 10 | 10 |
| <b>290</b>                         | SPC -first long day:2 week winter vs. SPC -8 weeks post:8 week winter   | 39.6  | 65.55 | -25.95 | 3.688 | 10 | 10 |
| <b>291</b>                         | SPC -first long day:4 week winter vs. SPC -first long day:8 week winter | 38.5  | 44.25 | -5.75  | 3.688 | 10 | 10 |
| <b>292</b>                         | SPC -first long day:4 week winter vs. SPC -4 weeks post:2 week winter   | 38.5  | 39.7  | -1.2   | 3.688 | 10 | 10 |
| <b>293</b>                         | SPC -first long day:4 week winter vs. SPC -4 weeks post:4 week winter   | 38.5  | 44.25 | -5.75  | 3.688 | 10 | 10 |
| <b>294</b>                         | SPC -first long day:4 week winter vs. SPC -4 weeks post:8 week winter   | 38.5  | 52.8  | -14.3  | 3.688 | 10 | 10 |
| <b>295</b>                         | SPC -first long day:4 week winter vs. SPC -8 weeks post:2 week winter   | 38.5  | 52.45 | -13.95 | 3.688 | 10 | 10 |
| <b>296</b>                         | SPC -first long day:4 week winter vs. SPC -8 weeks post:4 week winter   | 38.5  | 52.8  | -14.3  | 3.688 | 10 | 10 |
| <b>297</b>                         | SPC -first long day:4 week winter vs. SPC -8 weeks post:8 week winter   | 38.5  | 65.55 | -27.05 | 3.688 | 10 | 10 |
| <b>298</b>                         | SPC -first long day:8 week winter vs. SPC -4 weeks post:2 week winter   | 44.25 | 39.7  | 4.55   | 3.688 | 10 | 10 |
| <b>299</b>                         | SPC -first long day:8 week winter vs. SPC -4 weeks post:4 week winter   | 44.25 | 44.25 | 0      | 3.688 | 10 | 10 |
| <b>300</b>                         | SPC -first long day:8 week winter vs. SPC -4 weeks post:8 week winter   | 44.25 | 52.8  | -8.55  | 3.688 | 10 | 10 |

| 2way ANOVA<br>Multiple comparisons |                                                                       |       |       |        |       |    |    |
|------------------------------------|-----------------------------------------------------------------------|-------|-------|--------|-------|----|----|
| <b>301</b>                         | SPC -first long day:8 week winter vs. SPC -8 weeks post:2 week winter | 44.25 | 52.45 | -8.2   | 3.688 | 10 | 10 |
| <b>302</b>                         | SPC -first long day:8 week winter vs. SPC -8 weeks post:4 week winter | 44.25 | 52.8  | -8.55  | 3.688 | 10 | 10 |
| <b>303</b>                         | SPC -first long day:8 week winter vs. SPC -8 weeks post:8 week winter | 44.25 | 65.55 | -21.3  | 3.688 | 10 | 10 |
| <b>304</b>                         | SPC -4 weeks post:2 week winter vs. SPC -4 weeks post:4 week winter   | 39.7  | 44.25 | -4.55  | 3.688 | 10 | 10 |
| <b>305</b>                         | SPC -4 weeks post:2 week winter vs. SPC -4 weeks post:8 week winter   | 39.7  | 52.8  | -13.1  | 3.688 | 10 | 10 |
| <b>306</b>                         | SPC -4 weeks post:2 week winter vs. SPC -8 weeks post:2 week winter   | 39.7  | 52.45 | -12.75 | 3.688 | 10 | 10 |
| <b>307</b>                         | SPC -4 weeks post:2 week winter vs. SPC -8 weeks post:4 week winter   | 39.7  | 52.8  | -13.1  | 3.688 | 10 | 10 |
| <b>308</b>                         | SPC -4 weeks post:2 week winter vs. SPC -8 weeks post:8 week winter   | 39.7  | 65.55 | -25.85 | 3.688 | 10 | 10 |
| <b>309</b>                         | SPC -4 weeks post:4 week winter vs. SPC -4 weeks post:8 week winter   | 44.25 | 52.8  | -8.55  | 3.688 | 10 | 10 |
| <b>310</b>                         | SPC -4 weeks post:4 week winter vs. SPC -8 weeks post:2 week winter   | 44.25 | 52.45 | -8.2   | 3.688 | 10 | 10 |
| <b>311</b>                         | SPC -4 weeks post:4 week winter vs. SPC -8 weeks post:4 week winter   | 44.25 | 52.8  | -8.55  | 3.688 | 10 | 10 |
| <b>312</b>                         | SPC -4 weeks post:4 week winter vs. SPC -8 weeks post:8 week winter   | 44.25 | 65.55 | -21.3  | 3.688 | 10 | 10 |
| <b>313</b>                         | SPC -4 weeks post:8 week winter vs. SPC -8 weeks post:2 week winter   | 52.8  | 52.45 | 0.35   | 3.688 | 10 | 10 |
| <b>314</b>                         | SPC -4 weeks post:8 week winter vs. SPC -8 weeks post:4 week winter   | 52.8  | 52.8  | 0      | 3.688 | 10 | 10 |
| <b>315</b>                         | SPC -4 weeks post:8 week winter vs. SPC -8 weeks post:8 week winter   | 52.8  | 65.55 | -12.75 | 3.688 | 10 | 10 |
| <b>316</b>                         | SPC -8 weeks post:2 week winter vs. SPC -8 weeks post:4 week winter   | 52.45 | 52.8  | -0.35  | 3.688 | 10 | 10 |
| <b>317</b>                         | SPC -8 weeks post:2 week winter vs. SPC -8 weeks post:8 week winter   | 52.45 | 65.55 | -13.1  | 3.688 | 10 | 10 |
| <b>318</b>                         | SPC -8 weeks post:4 week winter vs. SPC -8 weeks post:8 week winter   | 52.8  | 65.55 | -12.75 | 3.688 | 10 | 10 |

|    |  |  |
|----|--|--|
|    |  |  |
|    |  |  |
|    |  |  |
| 1  |  |  |
| 2  |  |  |
| 3  |  |  |
| 4  |  |  |
| 5  |  |  |
| 6  |  |  |
| 7  |  |  |
| 8  |  |  |
| 9  |  |  |
| 10 |  |  |
| 11 |  |  |
| 12 |  |  |
| 13 |  |  |
| 14 |  |  |
| 15 |  |  |
| 16 |  |  |
| 17 |  |  |
| 18 |  |  |
| 19 |  |  |
| 20 |  |  |
| 21 |  |  |
| 22 |  |  |
| 23 |  |  |
| 24 |  |  |
| 25 |  |  |
| 26 |  |  |
| 27 |  |  |
| 28 |  |  |
| 29 |  |  |
| 30 |  |  |



|    |  |  |
|----|--|--|
|    |  |  |
|    |  |  |
|    |  |  |
| 31 |  |  |
| 32 |  |  |
| 33 |  |  |
| 34 |  |  |
| 35 |  |  |
| 36 |  |  |
| 37 |  |  |
| 38 |  |  |
| 39 |  |  |
| 40 |  |  |
| 41 |  |  |
| 42 |  |  |
| 43 |  |  |
| 44 |  |  |
| 45 |  |  |
| 46 |  |  |
| 47 |  |  |
| 48 |  |  |
| 49 |  |  |
| 50 |  |  |
| 51 |  |  |
| 52 |  |  |
| 53 |  |  |
| 54 |  |  |
| 55 |  |  |
| 56 |  |  |
| 57 |  |  |
| 58 |  |  |
| 59 |  |  |
| 60 |  |  |

|    |  |  |
|----|--|--|
|    |  |  |
|    |  |  |
|    |  |  |
| 61 |  |  |
| 62 |  |  |
| 63 |  |  |
| 64 |  |  |
| 65 |  |  |
| 66 |  |  |
| 67 |  |  |
| 68 |  |  |
| 69 |  |  |
| 70 |  |  |
| 71 |  |  |
| 72 |  |  |
| 73 |  |  |
| 74 |  |  |
| 75 |  |  |
| 76 |  |  |
| 77 |  |  |
| 78 |  |  |
| 79 |  |  |
| 80 |  |  |
| 81 |  |  |
| 82 |  |  |
| 83 |  |  |
| 84 |  |  |
| 85 |  |  |
| 86 |  |  |
| 87 |  |  |
| 88 |  |  |
| 89 |  |  |
| 90 |  |  |

|            |  |  |
|------------|--|--|
|            |  |  |
|            |  |  |
|            |  |  |
| <b>91</b>  |  |  |
| <b>92</b>  |  |  |
| <b>93</b>  |  |  |
| <b>94</b>  |  |  |
| <b>95</b>  |  |  |
| <b>96</b>  |  |  |
| <b>97</b>  |  |  |
| <b>98</b>  |  |  |
| <b>99</b>  |  |  |
| <b>100</b> |  |  |
| <b>101</b> |  |  |
| <b>102</b> |  |  |
| <b>103</b> |  |  |
| <b>104</b> |  |  |
| <b>105</b> |  |  |
| <b>106</b> |  |  |
| <b>107</b> |  |  |
| <b>108</b> |  |  |
| <b>109</b> |  |  |
| <b>110</b> |  |  |
| <b>111</b> |  |  |
| <b>112</b> |  |  |
| <b>113</b> |  |  |
| <b>114</b> |  |  |
| <b>115</b> |  |  |
| <b>116</b> |  |  |
| <b>117</b> |  |  |
| <b>118</b> |  |  |
| <b>119</b> |  |  |
| <b>120</b> |  |  |

|     |  |  |
|-----|--|--|
|     |  |  |
|     |  |  |
|     |  |  |
| 121 |  |  |
| 122 |  |  |
| 123 |  |  |
| 124 |  |  |
| 125 |  |  |
| 126 |  |  |
| 127 |  |  |
| 128 |  |  |
| 129 |  |  |
| 130 |  |  |
| 131 |  |  |
| 132 |  |  |
| 133 |  |  |
| 134 |  |  |
| 135 |  |  |
| 136 |  |  |
| 137 |  |  |
| 138 |  |  |
| 139 |  |  |
| 140 |  |  |
| 141 |  |  |
| 142 |  |  |
| 143 |  |  |
| 144 |  |  |
| 145 |  |  |
| 146 |  |  |
| 147 |  |  |
| 148 |  |  |
| 149 |  |  |
| 150 |  |  |

|            |        |     |
|------------|--------|-----|
|            |        |     |
|            |        |     |
|            |        |     |
| <b>151</b> |        |     |
| <b>152</b> |        |     |
| <b>153</b> |        |     |
| <b>154</b> |        |     |
| <b>155</b> |        |     |
| <b>156</b> |        |     |
| <b>157</b> |        |     |
| <b>158</b> |        |     |
| <b>159</b> |        |     |
| <b>160</b> |        |     |
| <b>161</b> |        |     |
| <b>162</b> |        |     |
| <b>163</b> |        |     |
| <b>164</b> | q      | DF  |
| <b>165</b> |        |     |
| <b>166</b> | 1.975  | 162 |
| <b>167</b> | 5.618  | 162 |
| <b>168</b> | 0.9395 | 162 |
| <b>169</b> | 6.788  | 162 |
| <b>170</b> | 6.327  | 162 |
| <b>171</b> | 10.05  | 162 |
| <b>172</b> | 11.08  | 162 |
| <b>173</b> | 14.17  | 162 |
| <b>174</b> | 0.7286 | 162 |
| <b>175</b> | 0.3068 | 162 |
| <b>176</b> | 2.512  | 162 |
| <b>177</b> | 0.767  | 162 |
| <b>178</b> | 2.512  | 162 |
| <b>179</b> | 5.79   | 162 |
| <b>180</b> | 5.656  | 162 |

|            |        |     |
|------------|--------|-----|
|            |        |     |
|            |        |     |
|            |        |     |
| <b>181</b> | 5.79   | 162 |
| <b>182</b> | 10.68  | 162 |
| <b>183</b> | 3.643  | 162 |
| <b>184</b> | 1.035  | 162 |
| <b>185</b> | 4.813  | 162 |
| <b>186</b> | 4.352  | 162 |
| <b>187</b> | 8.072  | 162 |
| <b>188</b> | 9.108  | 162 |
| <b>189</b> | 12.19  | 162 |
| <b>190</b> | 1.246  | 162 |
| <b>191</b> | 1.668  | 162 |
| <b>192</b> | 0.5369 | 162 |
| <b>193</b> | 1.208  | 162 |
| <b>194</b> | 0.5369 | 162 |
| <b>195</b> | 3.816  | 162 |
| <b>196</b> | 3.681  | 162 |
| <b>197</b> | 3.816  | 162 |
| <b>198</b> | 8.705  | 162 |
| <b>199</b> | 4.678  | 162 |
| <b>200</b> | 1.17   | 162 |
| <b>201</b> | 0.7094 | 162 |
| <b>202</b> | 4.429  | 162 |
| <b>203</b> | 5.465  | 162 |
| <b>204</b> | 8.552  | 162 |
| <b>205</b> | 4.889  | 162 |
| <b>206</b> | 5.311  | 162 |
| <b>207</b> | 3.106  | 162 |
| <b>208</b> | 4.851  | 162 |
| <b>209</b> | 3.106  | 162 |
| <b>210</b> | 0.1726 | 162 |

|            |         |     |
|------------|---------|-----|
|            |         |     |
|            |         |     |
|            |         |     |
| <b>211</b> | 0.03835 | 162 |
| <b>212</b> | 0.1726  | 162 |
| <b>213</b> | 5.062   | 162 |
| <b>214</b> | 5.848   | 162 |
| <b>215</b> | 5.388   | 162 |
| <b>216</b> | 9.108   | 162 |
| <b>217</b> | 10.14   | 162 |
| <b>218</b> | 13.23   | 162 |
| <b>219</b> | 0.2109  | 162 |
| <b>220</b> | 0.6327  | 162 |
| <b>221</b> | 1.572   | 162 |
| <b>222</b> | 0.1726  | 162 |
| <b>223</b> | 1.572   | 162 |
| <b>224</b> | 4.851   | 162 |
| <b>225</b> | 4.717   | 162 |
| <b>226</b> | 4.851   | 162 |
| <b>227</b> | 9.74    | 162 |
| <b>228</b> | 0.4602  | 162 |
| <b>229</b> | 3.26    | 162 |
| <b>230</b> | 4.295   | 162 |
| <b>231</b> | 7.382   | 162 |
| <b>232</b> | 6.059   | 162 |
| <b>233</b> | 6.481   | 162 |
| <b>234</b> | 4.276   | 162 |
| <b>235</b> | 6.021   | 162 |
| <b>236</b> | 4.276   | 162 |
| <b>237</b> | 0.997   | 162 |
| <b>238</b> | 1.131   | 162 |
| <b>239</b> | 0.997   | 162 |
| <b>240</b> | 3.892   | 162 |

|            |        |     |
|------------|--------|-----|
|            |        |     |
|            |        |     |
|            |        |     |
| <b>241</b> | 3.72   | 162 |
| <b>242</b> | 4.755  | 162 |
| <b>243</b> | 7.842  | 162 |
| <b>244</b> | 5.599  | 162 |
| <b>245</b> | 6.021  | 162 |
| <b>246</b> | 3.816  | 162 |
| <b>247</b> | 5.56   | 162 |
| <b>248</b> | 3.816  | 162 |
| <b>249</b> | 0.5369 | 162 |
| <b>250</b> | 0.6711 | 162 |
| <b>251</b> | 0.5369 | 162 |
| <b>252</b> | 4.352  | 162 |
| <b>253</b> | 1.035  | 162 |
| <b>254</b> | 4.122  | 162 |
| <b>255</b> | 9.318  | 162 |
| <b>256</b> | 9.74   | 162 |
| <b>257</b> | 7.535  | 162 |
| <b>258</b> | 9.28   | 162 |
| <b>259</b> | 7.535  | 162 |
| <b>260</b> | 4.257  | 162 |
| <b>261</b> | 4.391  | 162 |
| <b>262</b> | 4.257  | 162 |
| <b>263</b> | 0.6327 | 162 |
| <b>264</b> | 3.087  | 162 |
| <b>265</b> | 10.35  | 162 |
| <b>266</b> | 10.78  | 162 |
| <b>267</b> | 8.571  | 162 |
| <b>268</b> | 10.32  | 162 |
| <b>269</b> | 8.571  | 162 |
| <b>270</b> | 5.292  | 162 |



|            |         |     |
|------------|---------|-----|
|            |         |     |
|            |         |     |
|            |         |     |
| <b>271</b> | 5.426   | 162 |
| <b>272</b> | 5.292   | 162 |
| <b>273</b> | 0.4026  | 162 |
| <b>274</b> | 13.44   | 162 |
| <b>275</b> | 13.86   | 162 |
| <b>276</b> | 11.66   | 162 |
| <b>277</b> | 13.4    | 162 |
| <b>278</b> | 11.66   | 162 |
| <b>279</b> | 8.379   | 162 |
| <b>280</b> | 8.513   | 162 |
| <b>281</b> | 8.379   | 162 |
| <b>282</b> | 3.49    | 162 |
| <b>283</b> | 0.4218  | 162 |
| <b>284</b> | 1.783   | 162 |
| <b>285</b> | 0.03835 | 162 |
| <b>286</b> | 1.783   | 162 |
| <b>287</b> | 5.062   | 162 |
| <b>288</b> | 4.928   | 162 |
| <b>289</b> | 5.062   | 162 |
| <b>290</b> | 9.951   | 162 |
| <b>291</b> | 2.205   | 162 |
| <b>292</b> | 0.4602  | 162 |
| <b>293</b> | 2.205   | 162 |
| <b>294</b> | 5.484   | 162 |
| <b>295</b> | 5.349   | 162 |
| <b>296</b> | 5.484   | 162 |
| <b>297</b> | 10.37   | 162 |
| <b>298</b> | 1.745   | 162 |
| <b>299</b> | 0       | 162 |
| <b>300</b> | 3.279   | 162 |

|            |        |     |
|------------|--------|-----|
|            |        |     |
|            |        |     |
|            |        |     |
| <b>301</b> | 3.144  | 162 |
| <b>302</b> | 3.279  | 162 |
| <b>303</b> | 8.168  | 162 |
| <b>304</b> | 1.745  | 162 |
| <b>305</b> | 5.024  | 162 |
| <b>306</b> | 4.889  | 162 |
| <b>307</b> | 5.024  | 162 |
| <b>308</b> | 9.913  | 162 |
| <b>309</b> | 3.279  | 162 |
| <b>310</b> | 3.144  | 162 |
| <b>311</b> | 3.279  | 162 |
| <b>312</b> | 8.168  | 162 |
| <b>313</b> | 0.1342 | 162 |
| <b>314</b> | 0      | 162 |
| <b>315</b> | 4.889  | 162 |
| <b>316</b> | 0.1342 | 162 |
| <b>317</b> | 5.024  | 162 |
| <b>318</b> | 4.889  | 162 |

Data analyzed: Weigh FW grouped format

| <u>Source of Variation</u> | <u>Degrees of Freedom</u> | <u>Sum of Squares</u> | <u>Mean square</u> |
|----------------------------|---------------------------|-----------------------|--------------------|
| Pretreatment               | 2                         | 4194                  | 2097               |
| Treatment                  | 5                         | 15515                 | 3103               |
| Interaction                | 10                        | 1160                  | 116                |
| Residual (error)           | 162                       | 11016                 | 68                 |
| Total                      | 179                       | 31885                 |                    |

Does Pretreatment have the same effect at all values of Treatment?

Interaction accounts for 3.64% of the total variance.

F = 1.71. DF<sub>n</sub>=10 DF<sub>d</sub>=162

The P value = 0.0835

If there is no interaction overall, there is a 8.4% chance of randomly observing so much interaction in an experiment of this size. The interaction is considered not quite significant.

Does Pretreatment affect the result?

Pretreatment accounts for 13.15% of the total variance.

F = 30.84. DF<sub>n</sub>=2 DF<sub>d</sub>=162

The P value is < 0.0001

If Pretreatment has no effect overall, there is a less than 0.01% chance of randomly observing an effect this big (or bigger) in an experiment of this size. The effect is considered extremely significant.

Does Treatment affect the result?

Treatment accounts for 48.66% of the total variance.

F = 45.63. DF<sub>n</sub>=5 DF<sub>d</sub>=162

The P value is < 0.0001

If Treatment has no effect overall, there is a less than 0.01% chance of randomly observing an effect this big (or bigger) in an experiment of this size. The effect is considered extremely significant.

| 2way ANOVA<br>Tabular results |                          |                          |         |                 |                    |          |
|-------------------------------|--------------------------|--------------------------|---------|-----------------|--------------------|----------|
| 1                             | Table Analyzed           | Weight SW grouped format |         |                 |                    |          |
| 2                             |                          |                          |         |                 |                    |          |
| 3                             | Two-way ANOVA            | Ordinary                 |         |                 |                    |          |
| 4                             | Alpha                    | 0.05                     |         |                 |                    |          |
| 5                             |                          |                          |         |                 |                    |          |
| 6                             | Source of Variation      | % of total variation     | P value | P value summary | Significant?       |          |
| 7                             | Interaction              | 4.126                    | 0.0034  | **              | Yes                |          |
| 8                             | Treatment                | 13.24                    | <0.0001 | ****            | Yes                |          |
| 9                             | Pretreatment             | 16.33                    | <0.0001 | ****            | Yes                |          |
| 10                            |                          |                          |         |                 |                    |          |
| 11                            | ANOVA table              | SS (Type III)            | DF      | MS              | F (DFn, DFd)       | P value  |
| 12                            | Interaction              | 2230                     | 4       | 557.5           | F (4, 260) = 4.045 | P=0.0034 |
| 13                            | Treatment                | 7154                     | 2       | 3577            | F (2, 260) = 25.95 | P<0.0001 |
| 14                            | Pretreatment             | 8823                     | 2       | 4412            | F (2, 260) = 32.01 | P<0.0001 |
| 15                            | Residual                 | 35833                    | 260     | 137.8           |                    |          |
| 16                            |                          |                          |         |                 |                    |          |
| 17                            | Number of missing values | 1                        |         |                 |                    |          |

| 2way ANOVA<br>Multiple comparisons |                                                               |            |                    |              |             |                  |    |       |     |
|------------------------------------|---------------------------------------------------------------|------------|--------------------|--------------|-------------|------------------|----|-------|-----|
| 1                                  | Within each row, compare columns (simple effects within rows) |            |                    |              |             |                  |    |       |     |
| 2                                  |                                                               |            |                    |              |             |                  |    |       |     |
| 3                                  | Number of families                                            | 3          |                    |              |             |                  |    |       |     |
| 4                                  | Number of comparisons per family                              | 3          |                    |              |             |                  |    |       |     |
| 5                                  | Alpha                                                         | 0.05       |                    |              |             |                  |    |       |     |
| 6                                  |                                                               |            |                    |              |             |                  |    |       |     |
| 7                                  | Tukey's multiple comparisons test                             | Mean Diff. | 95.00% CI of diff. | Significant? | Summary     | Adjusted P Value |    |       |     |
| 8                                  |                                                               |            |                    |              |             |                  |    |       |     |
| 9                                  | SW_1                                                          |            |                    |              |             |                  |    |       |     |
| 10                                 | 2 week winter vs. 4 week winter                               | -2.233     | -9.378 to 4.912    | No           | ns          | 0.7418           |    |       |     |
| 11                                 | 2 week winter vs. 8 week winter                               | -6.733     | -13.88 to 0.4118   | No           | ns          | 0.0695           |    |       |     |
| 12                                 | 4 week winter vs. 8 week winter                               | -4.5       | -11.65 to 2.645    | No           | ns          | 0.3000           |    |       |     |
| 13                                 |                                                               |            |                    |              |             |                  |    |       |     |
| 14                                 | SW_2                                                          |            |                    |              |             |                  |    |       |     |
| 15                                 | 2 week winter vs. 4 week winter                               | -4.972     | -12.18 to 2.234    | No           | ns          | 0.2363           |    |       |     |
| 16                                 | 2 week winter vs. 8 week winter                               | -11.92     | -19.13 to -4.716   | Yes          | ***         | 0.0004           |    |       |     |
| 17                                 | 4 week winter vs. 8 week winter                               | -6.95      | -14.1 to 0.1951    | No           | ns          | 0.0586           |    |       |     |
| 18                                 |                                                               |            |                    |              |             |                  |    |       |     |
| 19                                 | SW_3                                                          |            |                    |              |             |                  |    |       |     |
| 20                                 | 2 week winter vs. 4 week winter                               | -12.38     | -19.53 to -5.238   | Yes          | ***         | 0.0002           |    |       |     |
| 21                                 | 2 week winter vs. 8 week winter                               | -23.43     | -30.58 to -16.29   | Yes          | ****        | <0.0001          |    |       |     |
| 22                                 | 4 week winter vs. 8 week winter                               | -11.05     | -18.2 to -3.905    | Yes          | ***         | 0.0009           |    |       |     |
| 23                                 |                                                               |            |                    |              |             |                  |    |       |     |
| 24                                 |                                                               |            |                    |              |             |                  |    |       |     |
| 25                                 | Test details                                                  | Mean 1     | Mean 2             | Mean Diff.   | SE of diff. | N1               | N2 | q     | DF  |
| 26                                 |                                                               |            |                    |              |             |                  |    |       |     |
| 27                                 | SW_1                                                          |            |                    |              |             |                  |    |       |     |
| 28                                 | 2 week winter vs. 4 week winter                               | 67.17      | 69.4               | -2.233       | 3.031       | 30               | 30 | 1.042 | 260 |
| 29                                 | 2 week winter vs. 8 week winter                               | 67.17      | 73.9               | -6.733       | 3.031       | 30               | 30 | 3.141 | 260 |
| 30                                 | 4 week winter vs. 8 week winter                               | 69.4       | 73.9               | -4.5         | 3.031       | 30               | 30 | 2.1   | 260 |

| 2way ANOVA<br>Multiple comparisons |                                 |       |       |        |       |    |    |       |     |
|------------------------------------|---------------------------------|-------|-------|--------|-------|----|----|-------|-----|
| 31                                 |                                 |       |       |        |       |    |    |       |     |
| 32                                 | SW_2                            |       |       |        |       |    |    |       |     |
| 33                                 | 2 week winter vs. 4 week winter | 68.83 | 73.8  | -4.972 | 3.057 | 29 | 30 | 2.3   | 260 |
| 34                                 | 2 week winter vs. 8 week winter | 68.83 | 80.75 | -11.92 | 3.057 | 29 | 30 | 5.515 | 260 |
| 35                                 | 4 week winter vs. 8 week winter | 73.8  | 80.75 | -6.95  | 3.031 | 30 | 30 | 3.243 | 260 |
| 36                                 |                                 |       |       |        |       |    |    |       |     |
| 37                                 | SW_3                            |       |       |        |       |    |    |       |     |
| 38                                 | 2 week winter vs. 4 week winter | 70.63 | 83.02 | -12.38 | 3.031 | 30 | 30 | 5.778 | 260 |
| 39                                 | 2 week winter vs. 8 week winter | 70.63 | 94.07 | -23.43 | 3.031 | 30 | 30 | 10.93 | 260 |
| 40                                 | 4 week winter vs. 8 week winter | 83.02 | 94.07 | -11.05 | 3.031 | 30 | 30 | 5.155 | 260 |

Data analyzed: Weight SW grouped format

| <u>Source of Variation</u> | <u>Degrees of Freedom</u> | <u>Sum of Squares</u> | <u>Mean square</u> |
|----------------------------|---------------------------|-----------------------|--------------------|
| Pretreatment               | 2                         | 8823                  | 4412               |
| Treatment                  | 2                         | 7154                  | 3577               |
| Interaction                | 4                         | 2230                  | 557.5              |
| Residual (error)           | 260                       | 35833                 | 137.8              |
| Total                      | 268                       |                       |                    |

Does Pretreatment have the same effect at all values of Treatment?

Interaction accounts for approximately 4.13% of the total variance.

F = 4.05. DF<sub>n</sub>=4 DF<sub>d</sub>=260

The P value = 0.0034

If there is no interaction overall, there is a 0.34% chance of randomly observing so much interaction in an experiment of this size. The interaction is considered very significant.

Since the interaction is statistically significant, the P values that follow for the row and column effects are difficult to interpret.

Does Pretreatment affect the result?

Pretreatment accounts for approximately 16.33% of the total variance.

F = 32.01. DF<sub>n</sub>=2 DF<sub>d</sub>=260

The P value is < 0.0001

If Pretreatment has no effect overall, there is a less than 0.01% chance of randomly observing an effect this big (or bigger) in an experiment of this size. The effect is considered extremely significant.

Does Treatment affect the result?

Treatment accounts for approximately 13.24% of the total variance.

F = 25.95. DF<sub>n</sub>=2 DF<sub>d</sub>=260

The P value is < 0.0001

If Treatment has no effect overall, there is a less than 0.01% chance of randomly observing an effect this big (or bigger) in an experiment of this size. The effect is considered extremely significant.

| 2way ANOVA<br>Tabular results |                          |                                    |         |                 |
|-------------------------------|--------------------------|------------------------------------|---------|-----------------|
| 1                             | Table Analyzed           | Condition factor FW grouped format |         |                 |
| 2                             |                          |                                    |         |                 |
| 3                             | Two-way ANOVA            | Ordinary                           |         |                 |
| 4                             | Alpha                    | 0.05                               |         |                 |
| 5                             |                          |                                    |         |                 |
| 6                             | Source of Variation      | % of total variation               | P value | P value summary |
| 7                             | Interaction              | 13.65                              | 0.0009  | ***             |
| 8                             | Treatment                | 16.21                              | <0.0001 | ****            |
| 9                             | Pretreatment             | 0.6868                             | 0.4507  | ns              |
| 10                            |                          |                                    |         |                 |
| 11                            | ANOVA table              | SS                                 | DF      | MS              |
| 12                            | Interaction              | 0.1266                             | 10      | 0.01266         |
| 13                            | Treatment                | 0.1504                             | 5       | 0.03008         |
| 14                            | Pretreatment             | 0.00637                            | 2       | 0.003185        |
| 15                            | Residual                 | 0.6442                             | 162     | 0.003977        |
| 16                            |                          |                                    |         |                 |
| 17                            | Number of missing values | 0                                  |         |                 |



|           |                     |          |
|-----------|---------------------|----------|
|           |                     |          |
|           |                     |          |
|           |                     |          |
| <b>1</b>  |                     |          |
| <b>2</b>  |                     |          |
| <b>3</b>  |                     |          |
| <b>4</b>  |                     |          |
| <b>5</b>  |                     |          |
| <b>6</b>  | Significant?        |          |
| <b>7</b>  | Yes                 |          |
| <b>8</b>  | Yes                 |          |
| <b>9</b>  | No                  |          |
| <b>10</b> |                     |          |
| <b>11</b> | F (DFn, DFd)        | P value  |
| <b>12</b> | F (10, 162) = 3.184 | P=0.0009 |
| <b>13</b> | F (5, 162) = 7.563  | P<0.0001 |
| <b>14</b> | F (2, 162) = 0.801  | P=0.4507 |
| <b>15</b> |                     |          |
| <b>16</b> |                     |          |
| <b>17</b> |                     |          |

| 2way ANOVA<br>Multiple comparisons |                                                                    |            |                      |              |
|------------------------------------|--------------------------------------------------------------------|------------|----------------------|--------------|
| 1                                  | Compare cell means regardless of rows and columns                  |            |                      |              |
| 2                                  |                                                                    |            |                      |              |
| 3                                  | Number of families                                                 | 1          |                      |              |
| 4                                  | Number of comparisons per family                                   | 153        |                      |              |
| 5                                  | Alpha                                                              | 0.05       |                      |              |
| 6                                  |                                                                    |            |                      |              |
| 7                                  | Tukey's multiple comparisons test                                  | Mean Diff. | 95.00% CI of diff.   | Significant? |
| 8                                  |                                                                    |            |                      |              |
| 9                                  | First long day:2 week winter vs. First long day:4 week winter      | -0.0454    | -0.1454 to 0.0546    | No           |
| 10                                 | First long day:2 week winter vs. First long day:8 week winter      | -0.0208    | -0.1208 to 0.0792    | No           |
| 11                                 | First long day:2 week winter vs. 4 weeks post winter:2 week winter | 0.01739    | -0.08262 to 0.1174   | No           |
| 12                                 | First long day:2 week winter vs. 4 weeks post winter:4 week winter | -0.06864   | -0.1686 to 0.03137   | No           |
| 13                                 | First long day:2 week winter vs. 4 weeks post winter:8 week winter | -0.01685   | -0.1169 to 0.08315   | No           |
| 14                                 | First long day:2 week winter vs. 8 weeks post winter:2 week winter | -0.07388   | -0.1739 to 0.02612   | No           |
| 15                                 | First long day:2 week winter vs. 8 weeks post winter:4 week winter | -0.01017   | -0.1102 to 0.08983   | No           |
| 16                                 | First long day:2 week winter vs. 8 weeks post winter:8 week winter | -0.04384   | -0.1438 to 0.05616   | No           |
| 17                                 | First long day:2 week winter vs. SPC -first long day:2 week winter | -0.05722   | -0.1572 to 0.04279   | No           |
| 18                                 | First long day:2 week winter vs. SPC -first long day:4 week winter | -0.01819   | -0.1182 to 0.08181   | No           |
| 19                                 | First long day:2 week winter vs. SPC -first long day:8 week winter | -0.01287   | -0.1129 to 0.08714   | No           |
| 20                                 | First long day:2 week winter vs. SPC -4 weeks post:2 week winter   | -0.04907   | -0.1491 to 0.05094   | No           |
| 21                                 | First long day:2 week winter vs. SPC -4 weeks post:4 week winter   | -0.01287   | -0.1129 to 0.08714   | No           |
| 22                                 | First long day:2 week winter vs. SPC -4 weeks post:8 week winter   | -0.07404   | -0.174 to 0.02596    | No           |
| 23                                 | First long day:2 week winter vs. SPC -8 weeks post:2 week winter   | -0.1528    | -0.2528 to -0.05278  | Yes          |
| 24                                 | First long day:2 week winter vs. SPC -8 weeks post:4 week winter   | -0.07404   | -0.174 to 0.02596    | No           |
| 25                                 | First long day:2 week winter vs. SPC -8 weeks post:8 week winter   | -0.09168   | -0.1917 to 0.008327  | No           |
| 26                                 | First long day:4 week winter vs. First long day:8 week winter      | 0.0246     | -0.0754 to 0.1246    | No           |
| 27                                 | First long day:4 week winter vs. 4 weeks post winter:2 week winter | 0.06279    | -0.03721 to 0.1628   | No           |
| 28                                 | First long day:4 week winter vs. 4 weeks post winter:4 week winter | -0.02323   | -0.1232 to 0.07677   | No           |
| 29                                 | First long day:4 week winter vs. 4 weeks post winter:8 week winter | 0.02855    | -0.07145 to 0.1286   | No           |
| 30                                 | First long day:4 week winter vs. 8 weeks post winter:2 week winter | -0.02848   | -0.1285 to 0.07153   | No           |
| 31                                 | First long day:4 week winter vs. 8 weeks post winter:4 week winter | 0.03523    | -0.06477 to 0.1352   | No           |
| 32                                 | First long day:4 week winter vs. 8 weeks post winter:8 week winter | 0.001561   | -0.09844 to 0.1016   | No           |
| 33                                 | First long day:4 week winter vs. SPC -first long day:2 week winter | -0.01182   | -0.1118 to 0.08819   | No           |
| 34                                 | First long day:4 week winter vs. SPC -first long day:4 week winter | 0.02721    | -0.07279 to 0.1272   | No           |
| 35                                 | First long day:4 week winter vs. SPC -first long day:8 week winter | 0.03253    | -0.06747 to 0.1325   | No           |
| 36                                 | First long day:4 week winter vs. SPC -4 weeks post:2 week winter   | -0.003666  | -0.1037 to 0.09634   | No           |
| 37                                 | First long day:4 week winter vs. SPC -4 weeks post:4 week winter   | 0.03253    | -0.06747 to 0.1325   | No           |
| 38                                 | First long day:4 week winter vs. SPC -4 weeks post:8 week winter   | -0.02864   | -0.1286 to 0.07137   | No           |
| 39                                 | First long day:4 week winter vs. SPC -8 weeks post:2 week winter   | -0.1074    | -0.2074 to -0.007382 | Yes          |
| 40                                 | First long day:4 week winter vs. SPC -8 weeks post:4 week winter   | -0.02864   | -0.1286 to 0.07137   | No           |
| 41                                 | First long day:4 week winter vs. SPC -8 weeks post:8 week winter   | -0.04627   | -0.1463 to 0.05373   | No           |
| 42                                 | First long day:8 week winter vs. 4 weeks post winter:2 week winter | 0.03819    | -0.06182 to 0.1382   | No           |
| 43                                 | First long day:8 week winter vs. 4 weeks post winter:4 week winter | -0.04784   | -0.1478 to 0.05217   | No           |
| 44                                 | First long day:8 week winter vs. 4 weeks post winter:8 week winter | 0.00395    | -0.09605 to 0.104    | No           |
| 45                                 | First long day:8 week winter vs. 8 weeks post winter:2 week winter | -0.05308   | -0.1531 to 0.04692   | No           |

| 2way ANOVA<br>Multiple comparisons |                                                                         |           |                     |     |
|------------------------------------|-------------------------------------------------------------------------|-----------|---------------------|-----|
| 46                                 | First long day:8 week winter vs. 8 weeks post winter:4 week winter      | 0.01063   | -0.08938 to 0.1106  | No  |
| 47                                 | First long day:8 week winter vs. 8 weeks post winter:8 week winter      | -0.02304  | -0.123 to 0.07696   | No  |
| 48                                 | First long day:8 week winter vs. SPC -first long day:2 week winter      | -0.03642  | -0.1364 to 0.06359  | No  |
| 49                                 | First long day:8 week winter vs. SPC -first long day:4 week winter      | 0.00261   | -0.09739 to 0.1026  | No  |
| 50                                 | First long day:8 week winter vs. SPC -first long day:8 week winter      | 0.007931  | -0.09207 to 0.1079  | No  |
| 51                                 | First long day:8 week winter vs. SPC -4 weeks post:2 week winter        | -0.02827  | -0.1283 to 0.07174  | No  |
| 52                                 | First long day:8 week winter vs. SPC -4 weeks post:4 week winter        | 0.007931  | -0.09207 to 0.1079  | No  |
| 53                                 | First long day:8 week winter vs. SPC -4 weeks post:8 week winter        | -0.05324  | -0.1532 to 0.04676  | No  |
| 54                                 | First long day:8 week winter vs. SPC -8 weeks post:2 week winter        | -0.132    | -0.232 to -0.03198  | Yes |
| 55                                 | First long day:8 week winter vs. SPC -8 weeks post:4 week winter        | -0.05324  | -0.1532 to 0.04676  | No  |
| 56                                 | First long day:8 week winter vs. SPC -8 weeks post:8 week winter        | -0.07088  | -0.1709 to 0.02913  | No  |
| 57                                 | 4 weeks post winter:2 week winter vs. 4 weeks post winter:4 week winter | -0.08602  | -0.186 to 0.01398   | No  |
| 58                                 | 4 weeks post winter:2 week winter vs. 4 weeks post winter:8 week winter | -0.03424  | -0.1342 to 0.06577  | No  |
| 59                                 | 4 weeks post winter:2 week winter vs. 8 weeks post winter:2 week winter | -0.09127  | -0.1913 to 0.008735 | No  |
| 60                                 | 4 weeks post winter:2 week winter vs. 8 weeks post winter:4 week winter | -0.02756  | -0.1276 to 0.07245  | No  |
| 61                                 | 4 weeks post winter:2 week winter vs. 8 weeks post winter:8 week winter | -0.06123  | -0.1612 to 0.03878  | No  |
| 62                                 | 4 weeks post winter:2 week winter vs. SPC -first long day:2 week winter | -0.07461  | -0.1746 to 0.0254   | No  |
| 63                                 | 4 weeks post winter:2 week winter vs. SPC -first long day:4 week winter | -0.03558  | -0.1356 to 0.06443  | No  |
| 64                                 | 4 weeks post winter:2 week winter vs. SPC -first long day:8 week winter | -0.03026  | -0.1303 to 0.06975  | No  |
| 65                                 | 4 weeks post winter:2 week winter vs. SPC -4 weeks post:2 week winter   | -0.06646  | -0.1665 to 0.03355  | No  |
| 66                                 | 4 weeks post winter:2 week winter vs. SPC -4 weeks post:4 week winter   | -0.03026  | -0.1303 to 0.06975  | No  |
| 67                                 | 4 weeks post winter:2 week winter vs. SPC -4 weeks post:8 week winter   | -0.09143  | -0.1914 to 0.008575 | No  |
| 68                                 | 4 weeks post winter:2 week winter vs. SPC -8 weeks post:2 week winter   | -0.1702   | -0.2702 to -0.07017 | Yes |
| 69                                 | 4 weeks post winter:2 week winter vs. SPC -8 weeks post:4 week winter   | -0.09143  | -0.1914 to 0.008575 | No  |
| 70                                 | 4 weeks post winter:2 week winter vs. SPC -8 weeks post:8 week winter   | -0.1091   | -0.2091 to -0.00906 | Yes |
| 71                                 | 4 weeks post winter:4 week winter vs. 4 weeks post winter:8 week winter | 0.05179   | -0.04822 to 0.1518  | No  |
| 72                                 | 4 weeks post winter:4 week winter vs. 8 weeks post winter:2 week winter | -0.005246 | -0.1053 to 0.09476  | No  |
| 73                                 | 4 weeks post winter:4 week winter vs. 8 weeks post winter:4 week winter | 0.05847   | -0.04154 to 0.1585  | No  |
| 74                                 | 4 weeks post winter:4 week winter vs. 8 weeks post winter:8 week winter | 0.02479   | -0.07521 to 0.1248  | No  |
| 75                                 | 4 weeks post winter:4 week winter vs. SPC -first long day:2 week winter | 0.01142   | -0.08859 to 0.1114  | No  |
| 76                                 | 4 weeks post winter:4 week winter vs. SPC -first long day:4 week winter | 0.05045   | -0.04956 to 0.1505  | No  |
| 77                                 | 4 weeks post winter:4 week winter vs. SPC -first long day:8 week winter | 0.05577   | -0.04424 to 0.1558  | No  |
| 78                                 | 4 weeks post winter:4 week winter vs. SPC -4 weeks post:2 week winter   | 0.01957   | -0.08044 to 0.1196  | No  |
| 79                                 | 4 weeks post winter:4 week winter vs. SPC -4 weeks post:4 week winter   | 0.05577   | -0.04424 to 0.1558  | No  |
| 80                                 | 4 weeks post winter:4 week winter vs. SPC -4 weeks post:8 week winter   | -0.005406 | -0.1054 to 0.0946   | No  |
| 81                                 | 4 weeks post winter:4 week winter vs. SPC -8 weeks post:2 week winter   | -0.08415  | -0.1842 to 0.01585  | No  |
| 82                                 | 4 weeks post winter:4 week winter vs. SPC -8 weeks post:4 week winter   | -0.005406 | -0.1054 to 0.0946   | No  |
| 83                                 | 4 weeks post winter:4 week winter vs. SPC -8 weeks post:8 week winter   | -0.02304  | -0.123 to 0.07696   | No  |
| 84                                 | 4 weeks post winter:8 week winter vs. 8 weeks post winter:2 week winter | -0.05703  | -0.157 to 0.04297   | No  |
| 85                                 | 4 weeks post winter:8 week winter vs. 8 weeks post winter:4 week winter | 0.006679  | -0.09333 to 0.1067  | No  |
| 86                                 | 4 weeks post winter:8 week winter vs. 8 weeks post winter:8 week winter | -0.02699  | -0.127 to 0.07301   | No  |
| 87                                 | 4 weeks post winter:8 week winter vs. SPC -first long day:2 week winter | -0.04037  | -0.1404 to 0.05964  | No  |
| 88                                 | 4 weeks post winter:8 week winter vs. SPC -first long day:4 week winter | -0.00134  | -0.1013 to 0.09866  | No  |
| 89                                 | 4 weeks post winter:8 week winter vs. SPC -first long day:8 week winter | 0.003981  | -0.09602 to 0.104   | No  |
| 90                                 | 4 weeks post winter:8 week winter vs. SPC -4 weeks post:2 week winter   | -0.03222  | -0.1322 to 0.06779  | No  |

| 2way ANOVA<br>Multiple comparisons |                                                                         |           |                     |     |
|------------------------------------|-------------------------------------------------------------------------|-----------|---------------------|-----|
| 91                                 | 4 weeks post winter:8 week winter vs. SPC -4 weeks post:4 week winter   | 0.003981  | -0.09602 to 0.104   | No  |
| 92                                 | 4 weeks post winter:8 week winter vs. SPC -4 weeks post:8 week winter   | -0.05719  | -0.1572 to 0.04281  | No  |
| 93                                 | 4 weeks post winter:8 week winter vs. SPC -8 weeks post:2 week winter   | -0.1359   | -0.2359 to -0.03593 | Yes |
| 94                                 | 4 weeks post winter:8 week winter vs. SPC -8 weeks post:4 week winter   | -0.05719  | -0.1572 to 0.04281  | No  |
| 95                                 | 4 weeks post winter:8 week winter vs. SPC -8 weeks post:8 week winter   | -0.07483  | -0.1748 to 0.02518  | No  |
| 96                                 | 8 weeks post winter:2 week winter vs. 8 weeks post winter:4 week winter | 0.06371   | -0.03629 to 0.1637  | No  |
| 97                                 | 8 weeks post winter:2 week winter vs. 8 weeks post winter:8 week winter | 0.03004   | -0.06996 to 0.13    | No  |
| 98                                 | 8 weeks post winter:2 week winter vs. SPC -first long day:2 week winter | 0.01666   | -0.08334 to 0.1167  | No  |
| 99                                 | 8 weeks post winter:2 week winter vs. SPC -first long day:4 week winter | 0.05569   | -0.04431 to 0.1557  | No  |
| 100                                | 8 weeks post winter:2 week winter vs. SPC -first long day:8 week winter | 0.06101   | -0.03899 to 0.161   | No  |
| 101                                | 8 weeks post winter:2 week winter vs. SPC -4 weeks post:2 week winter   | 0.02481   | -0.07519 to 0.1248  | No  |
| 102                                | 8 weeks post winter:2 week winter vs. SPC -4 weeks post:4 week winter   | 0.06101   | -0.03899 to 0.161   | No  |
| 103                                | 8 weeks post winter:2 week winter vs. SPC -4 weeks post:8 week winter   | -0.00016  | -0.1002 to 0.09984  | No  |
| 104                                | 8 weeks post winter:2 week winter vs. SPC -8 weeks post:2 week winter   | -0.07891  | -0.1789 to 0.0211   | No  |
| 105                                | 8 weeks post winter:2 week winter vs. SPC -8 weeks post:4 week winter   | -0.00016  | -0.1002 to 0.09984  | No  |
| 106                                | 8 weeks post winter:2 week winter vs. SPC -8 weeks post:8 week winter   | -0.0178   | -0.1178 to 0.08221  | No  |
| 107                                | 8 weeks post winter:4 week winter vs. 8 weeks post winter:8 week winter | -0.03367  | -0.1337 to 0.06633  | No  |
| 108                                | 8 weeks post winter:4 week winter vs. SPC -first long day:2 week winter | -0.04705  | -0.1471 to 0.05296  | No  |
| 109                                | 8 weeks post winter:4 week winter vs. SPC -first long day:4 week winter | -0.008019 | -0.108 to 0.09199   | No  |
| 110                                | 8 weeks post winter:4 week winter vs. SPC -first long day:8 week winter | -0.002698 | -0.1027 to 0.09731  | No  |
| 111                                | 8 weeks post winter:4 week winter vs. SPC -4 weeks post:2 week winter   | -0.0389   | -0.1389 to 0.06111  | No  |
| 112                                | 8 weeks post winter:4 week winter vs. SPC -4 weeks post:4 week winter   | -0.002698 | -0.1027 to 0.09731  | No  |
| 113                                | 8 weeks post winter:4 week winter vs. SPC -4 weeks post:8 week winter   | -0.06387  | -0.1639 to 0.03613  | No  |
| 114                                | 8 weeks post winter:4 week winter vs. SPC -8 weeks post:2 week winter   | -0.1426   | -0.2426 to -0.04261 | Yes |
| 115                                | 8 weeks post winter:4 week winter vs. SPC -8 weeks post:4 week winter   | -0.06387  | -0.1639 to 0.03613  | No  |
| 116                                | 8 weeks post winter:4 week winter vs. SPC -8 weeks post:8 week winter   | -0.08151  | -0.1815 to 0.0185   | No  |
| 117                                | 8 weeks post winter:8 week winter vs. SPC -first long day:2 week winter | -0.01338  | -0.1134 to 0.08663  | No  |
| 118                                | 8 weeks post winter:8 week winter vs. SPC -first long day:4 week winter | 0.02565   | -0.07435 to 0.1257  | No  |
| 119                                | 8 weeks post winter:8 week winter vs. SPC -first long day:8 week winter | 0.03097   | -0.06903 to 0.131   | No  |
| 120                                | 8 weeks post winter:8 week winter vs. SPC -4 weeks post:2 week winter   | -0.005226 | -0.1052 to 0.09478  | No  |
| 121                                | 8 weeks post winter:8 week winter vs. SPC -4 weeks post:4 week winter   | 0.03097   | -0.06903 to 0.131   | No  |
| 122                                | 8 weeks post winter:8 week winter vs. SPC -4 weeks post:8 week winter   | -0.0302   | -0.1302 to 0.0698   | No  |
| 123                                | 8 weeks post winter:8 week winter vs. SPC -8 weeks post:2 week winter   | -0.1089   | -0.209 to -0.008942 | Yes |
| 124                                | 8 weeks post winter:8 week winter vs. SPC -8 weeks post:4 week winter   | -0.0302   | -0.1302 to 0.0698   | No  |
| 125                                | 8 weeks post winter:8 week winter vs. SPC -8 weeks post:8 week winter   | -0.04784  | -0.1478 to 0.05217  | No  |
| 126                                | SPC -first long day:2 week winter vs. SPC -first long day:4 week winter | 0.03903   | -0.06098 to 0.139   | No  |
| 127                                | SPC -first long day:2 week winter vs. SPC -first long day:8 week winter | 0.04435   | -0.05566 to 0.1444  | No  |
| 128                                | SPC -first long day:2 week winter vs. SPC -4 weeks post:2 week winter   | 0.00815   | -0.09185 to 0.1082  | No  |
| 129                                | SPC -first long day:2 week winter vs. SPC -4 weeks post:4 week winter   | 0.04435   | -0.05566 to 0.1444  | No  |
| 130                                | SPC -first long day:2 week winter vs. SPC -4 weeks post:8 week winter   | -0.01682  | -0.1168 to 0.08318  | No  |
| 131                                | SPC -first long day:2 week winter vs. SPC -8 weeks post:2 week winter   | -0.09557  | -0.1956 to 0.004434 | No  |
| 132                                | SPC -first long day:2 week winter vs. SPC -8 weeks post:4 week winter   | -0.01682  | -0.1168 to 0.08318  | No  |
| 133                                | SPC -first long day:2 week winter vs. SPC -8 weeks post:8 week winter   | -0.03446  | -0.1345 to 0.06555  | No  |
| 134                                | SPC -first long day:4 week winter vs. SPC -first long day:8 week winter | 0.005321  | -0.09468 to 0.1053  | No  |
| 135                                | SPC -first long day:4 week winter vs. SPC -4 weeks post:2 week winter   | -0.03088  | -0.1309 to 0.06913  | No  |

| 2way ANOVA<br>Multiple comparisons |                                                                       |          |                      |            |
|------------------------------------|-----------------------------------------------------------------------|----------|----------------------|------------|
| 136                                | SPC -first long day:4 week winter vs. SPC -4 weeks post:4 week winter | 0.005321 | -0.09468 to 0.1053   | No         |
| 137                                | SPC -first long day:4 week winter vs. SPC -4 weeks post:8 week winter | -0.05585 | -0.1559 to 0.04415   | No         |
| 138                                | SPC -first long day:4 week winter vs. SPC -8 weeks post:2 week winter | -0.1346  | -0.2346 to -0.03459  | Yes        |
| 139                                | SPC -first long day:4 week winter vs. SPC -8 weeks post:4 week winter | -0.05585 | -0.1559 to 0.04415   | No         |
| 140                                | SPC -first long day:4 week winter vs. SPC -8 weeks post:8 week winter | -0.07349 | -0.1735 to 0.02652   | No         |
| 141                                | SPC -first long day:8 week winter vs. SPC -4 weeks post:2 week winter | -0.0362  | -0.1362 to 0.06381   | No         |
| 142                                | SPC -first long day:8 week winter vs. SPC -4 weeks post:4 week winter | 0        | -0.1 to 0.1          | No         |
| 143                                | SPC -first long day:8 week winter vs. SPC -4 weeks post:8 week winter | -0.06117 | -0.1612 to 0.03883   | No         |
| 144                                | SPC -first long day:8 week winter vs. SPC -8 weeks post:2 week winter | -0.1399  | -0.2399 to -0.03992  | Yes        |
| 145                                | SPC -first long day:8 week winter vs. SPC -8 weeks post:4 week winter | -0.06117 | -0.1612 to 0.03883   | No         |
| 146                                | SPC -first long day:8 week winter vs. SPC -8 weeks post:8 week winter | -0.07881 | -0.1788 to 0.0212    | No         |
| 147                                | SPC -4 weeks post:2 week winter vs. SPC -4 weeks post:4 week winter   | 0.0362   | -0.06381 to 0.1362   | No         |
| 148                                | SPC -4 weeks post:2 week winter vs. SPC -4 weeks post:8 week winter   | -0.02497 | -0.125 to 0.07503    | No         |
| 149                                | SPC -4 weeks post:2 week winter vs. SPC -8 weeks post:2 week winter   | -0.1037  | -0.2037 to -0.003716 | Yes        |
| 150                                | SPC -4 weeks post:2 week winter vs. SPC -8 weeks post:4 week winter   | -0.02497 | -0.125 to 0.07503    | No         |
| 151                                | SPC -4 weeks post:2 week winter vs. SPC -8 weeks post:8 week winter   | -0.04261 | -0.1426 to 0.0574    | No         |
| 152                                | SPC -4 weeks post:4 week winter vs. SPC -4 weeks post:8 week winter   | -0.06117 | -0.1612 to 0.03883   | No         |
| 153                                | SPC -4 weeks post:4 week winter vs. SPC -8 weeks post:2 week winter   | -0.1399  | -0.2399 to -0.03992  | Yes        |
| 154                                | SPC -4 weeks post:4 week winter vs. SPC -8 weeks post:4 week winter   | -0.06117 | -0.1612 to 0.03883   | No         |
| 155                                | SPC -4 weeks post:4 week winter vs. SPC -8 weeks post:8 week winter   | -0.07881 | -0.1788 to 0.0212    | No         |
| 156                                | SPC -4 weeks post:8 week winter vs. SPC -8 weeks post:2 week winter   | -0.07875 | -0.1788 to 0.02126   | No         |
| 157                                | SPC -4 weeks post:8 week winter vs. SPC -8 weeks post:4 week winter   | 0        | -0.1 to 0.1          | No         |
| 158                                | SPC -4 weeks post:8 week winter vs. SPC -8 weeks post:8 week winter   | -0.01764 | -0.1176 to 0.08237   | No         |
| 159                                | SPC -8 weeks post:2 week winter vs. SPC -8 weeks post:4 week winter   | 0.07875  | -0.02126 to 0.1788   | No         |
| 160                                | SPC -8 weeks post:2 week winter vs. SPC -8 weeks post:8 week winter   | 0.06111  | -0.03889 to 0.1611   | No         |
| 161                                | SPC -8 weeks post:4 week winter vs. SPC -8 weeks post:8 week winter   | -0.01764 | -0.1176 to 0.08237   | No         |
| 162                                |                                                                       |          |                      |            |
| 163                                |                                                                       |          |                      |            |
| 164                                | Test details                                                          | Mean 1   | Mean 2               | Mean Diff. |
| 165                                |                                                                       |          |                      |            |
| 166                                | First long day:2 week winter vs. First long day:4 week winter         | 1.174    | 1.219                | -0.0454    |
| 167                                | First long day:2 week winter vs. First long day:8 week winter         | 1.174    | 1.194                | -0.0208    |
| 168                                | First long day:2 week winter vs. 4 weeks post winter:2 week winter    | 1.174    | 1.156                | 0.01739    |
| 169                                | First long day:2 week winter vs. 4 weeks post winter:4 week winter    | 1.174    | 1.242                | -0.06864   |
| 170                                | First long day:2 week winter vs. 4 weeks post winter:8 week winter    | 1.174    | 1.191                | -0.01685   |
| 171                                | First long day:2 week winter vs. 8 weeks post winter:2 week winter    | 1.174    | 1.248                | -0.07388   |
| 172                                | First long day:2 week winter vs. 8 weeks post winter:4 week winter    | 1.174    | 1.184                | -0.01017   |
| 173                                | First long day:2 week winter vs. 8 weeks post winter:8 week winter    | 1.174    | 1.217                | -0.04384   |
| 174                                | First long day:2 week winter vs. SPC -first long day:2 week winter    | 1.174    | 1.231                | -0.05722   |
| 175                                | First long day:2 week winter vs. SPC -first long day:4 week winter    | 1.174    | 1.192                | -0.01819   |
| 176                                | First long day:2 week winter vs. SPC -first long day:8 week winter    | 1.174    | 1.187                | -0.01287   |
| 177                                | First long day:2 week winter vs. SPC -4 weeks post:2 week winter      | 1.174    | 1.223                | -0.04907   |
| 178                                | First long day:2 week winter vs. SPC -4 weeks post:4 week winter      | 1.174    | 1.187                | -0.01287   |
| 179                                | First long day:2 week winter vs. SPC -4 weeks post:8 week winter      | 1.174    | 1.248                | -0.07404   |
| 180                                | First long day:2 week winter vs. SPC -8 weeks post:2 week winter      | 1.174    | 1.326                | -0.1528    |

| 2way ANOVA<br>Multiple comparisons |                                                                         |       |       |           |
|------------------------------------|-------------------------------------------------------------------------|-------|-------|-----------|
| 181                                | First long day:2 week winter vs. SPC -8 weeks post:4 week winter        | 1.174 | 1.248 | -0.07404  |
| 182                                | First long day:2 week winter vs. SPC -8 weeks post:8 week winter        | 1.174 | 1.265 | -0.09168  |
| 183                                | First long day:4 week winter vs. First long day:8 week winter           | 1.219 | 1.194 | 0.0246    |
| 184                                | First long day:4 week winter vs. 4 weeks post winter:2 week winter      | 1.219 | 1.156 | 0.06279   |
| 185                                | First long day:4 week winter vs. 4 weeks post winter:4 week winter      | 1.219 | 1.242 | -0.02323  |
| 186                                | First long day:4 week winter vs. 4 weeks post winter:8 week winter      | 1.219 | 1.191 | 0.02855   |
| 187                                | First long day:4 week winter vs. 8 weeks post winter:2 week winter      | 1.219 | 1.248 | -0.02848  |
| 188                                | First long day:4 week winter vs. 8 weeks post winter:4 week winter      | 1.219 | 1.184 | 0.03523   |
| 189                                | First long day:4 week winter vs. 8 weeks post winter:8 week winter      | 1.219 | 1.217 | 0.001561  |
| 190                                | First long day:4 week winter vs. SPC -first long day:2 week winter      | 1.219 | 1.231 | -0.01182  |
| 191                                | First long day:4 week winter vs. SPC -first long day:4 week winter      | 1.219 | 1.192 | 0.02721   |
| 192                                | First long day:4 week winter vs. SPC -first long day:8 week winter      | 1.219 | 1.187 | 0.03253   |
| 193                                | First long day:4 week winter vs. SPC -4 weeks post:2 week winter        | 1.219 | 1.223 | -0.003666 |
| 194                                | First long day:4 week winter vs. SPC -4 weeks post:4 week winter        | 1.219 | 1.187 | 0.03253   |
| 195                                | First long day:4 week winter vs. SPC -4 weeks post:8 week winter        | 1.219 | 1.248 | -0.02864  |
| 196                                | First long day:4 week winter vs. SPC -8 weeks post:2 week winter        | 1.219 | 1.326 | -0.1074   |
| 197                                | First long day:4 week winter vs. SPC -8 weeks post:4 week winter        | 1.219 | 1.248 | -0.02864  |
| 198                                | First long day:4 week winter vs. SPC -8 weeks post:8 week winter        | 1.219 | 1.265 | -0.04627  |
| 199                                | First long day:8 week winter vs. 4 weeks post winter:2 week winter      | 1.194 | 1.156 | 0.03819   |
| 200                                | First long day:8 week winter vs. 4 weeks post winter:4 week winter      | 1.194 | 1.242 | -0.04784  |
| 201                                | First long day:8 week winter vs. 4 weeks post winter:8 week winter      | 1.194 | 1.191 | 0.00395   |
| 202                                | First long day:8 week winter vs. 8 weeks post winter:2 week winter      | 1.194 | 1.248 | -0.05308  |
| 203                                | First long day:8 week winter vs. 8 weeks post winter:4 week winter      | 1.194 | 1.184 | 0.01063   |
| 204                                | First long day:8 week winter vs. 8 weeks post winter:8 week winter      | 1.194 | 1.217 | -0.02304  |
| 205                                | First long day:8 week winter vs. SPC -first long day:2 week winter      | 1.194 | 1.231 | -0.03642  |
| 206                                | First long day:8 week winter vs. SPC -first long day:4 week winter      | 1.194 | 1.192 | 0.00261   |
| 207                                | First long day:8 week winter vs. SPC -first long day:8 week winter      | 1.194 | 1.187 | 0.007931  |
| 208                                | First long day:8 week winter vs. SPC -4 weeks post:2 week winter        | 1.194 | 1.223 | -0.02827  |
| 209                                | First long day:8 week winter vs. SPC -4 weeks post:4 week winter        | 1.194 | 1.187 | 0.007931  |
| 210                                | First long day:8 week winter vs. SPC -4 weeks post:8 week winter        | 1.194 | 1.248 | -0.05324  |
| 211                                | First long day:8 week winter vs. SPC -8 weeks post:2 week winter        | 1.194 | 1.326 | -0.132    |
| 212                                | First long day:8 week winter vs. SPC -8 weeks post:4 week winter        | 1.194 | 1.248 | -0.05324  |
| 213                                | First long day:8 week winter vs. SPC -8 weeks post:8 week winter        | 1.194 | 1.265 | -0.07088  |
| 214                                | 4 weeks post winter:2 week winter vs. 4 weeks post winter:4 week winter | 1.156 | 1.242 | -0.08602  |
| 215                                | 4 weeks post winter:2 week winter vs. 4 weeks post winter:8 week winter | 1.156 | 1.191 | -0.03424  |
| 216                                | 4 weeks post winter:2 week winter vs. 8 weeks post winter:2 week winter | 1.156 | 1.248 | -0.09127  |
| 217                                | 4 weeks post winter:2 week winter vs. 8 weeks post winter:4 week winter | 1.156 | 1.184 | -0.02756  |
| 218                                | 4 weeks post winter:2 week winter vs. 8 weeks post winter:8 week winter | 1.156 | 1.217 | -0.06123  |
| 219                                | 4 weeks post winter:2 week winter vs. SPC -first long day:2 week winter | 1.156 | 1.231 | -0.07461  |
| 220                                | 4 weeks post winter:2 week winter vs. SPC -first long day:4 week winter | 1.156 | 1.192 | -0.03558  |
| 221                                | 4 weeks post winter:2 week winter vs. SPC -first long day:8 week winter | 1.156 | 1.187 | -0.03026  |
| 222                                | 4 weeks post winter:2 week winter vs. SPC -4 weeks post:2 week winter   | 1.156 | 1.223 | -0.06646  |
| 223                                | 4 weeks post winter:2 week winter vs. SPC -4 weeks post:4 week winter   | 1.156 | 1.187 | -0.03026  |
| 224                                | 4 weeks post winter:2 week winter vs. SPC -4 weeks post:8 week winter   | 1.156 | 1.248 | -0.09143  |
| 225                                | 4 weeks post winter:2 week winter vs. SPC -8 weeks post:2 week winter   | 1.156 | 1.326 | -0.1702   |

| 2way ANOVA<br>Multiple comparisons |                                                                         |       |       |           |
|------------------------------------|-------------------------------------------------------------------------|-------|-------|-----------|
| 226                                | 4 weeks post winter:2 week winter vs. SPC -8 weeks post:4 week winter   | 1.156 | 1.248 | -0.09143  |
| 227                                | 4 weeks post winter:2 week winter vs. SPC -8 weeks post:8 week winter   | 1.156 | 1.265 | -0.1091   |
| 228                                | 4 weeks post winter:4 week winter vs. 4 weeks post winter:8 week winter | 1.242 | 1.191 | 0.05179   |
| 229                                | 4 weeks post winter:4 week winter vs. 8 weeks post winter:2 week winter | 1.242 | 1.248 | -0.005246 |
| 230                                | 4 weeks post winter:4 week winter vs. 8 weeks post winter:4 week winter | 1.242 | 1.184 | 0.05847   |
| 231                                | 4 weeks post winter:4 week winter vs. 8 weeks post winter:8 week winter | 1.242 | 1.217 | 0.02479   |
| 232                                | 4 weeks post winter:4 week winter vs. SPC -first long day:2 week winter | 1.242 | 1.231 | 0.01142   |
| 233                                | 4 weeks post winter:4 week winter vs. SPC -first long day:4 week winter | 1.242 | 1.192 | 0.05045   |
| 234                                | 4 weeks post winter:4 week winter vs. SPC -first long day:8 week winter | 1.242 | 1.187 | 0.05577   |
| 235                                | 4 weeks post winter:4 week winter vs. SPC -4 weeks post:2 week winter   | 1.242 | 1.223 | 0.01957   |
| 236                                | 4 weeks post winter:4 week winter vs. SPC -4 weeks post:4 week winter   | 1.242 | 1.187 | 0.05577   |
| 237                                | 4 weeks post winter:4 week winter vs. SPC -4 weeks post:8 week winter   | 1.242 | 1.248 | -0.005406 |
| 238                                | 4 weeks post winter:4 week winter vs. SPC -8 weeks post:2 week winter   | 1.242 | 1.326 | -0.08415  |
| 239                                | 4 weeks post winter:4 week winter vs. SPC -8 weeks post:4 week winter   | 1.242 | 1.248 | -0.005406 |
| 240                                | 4 weeks post winter:4 week winter vs. SPC -8 weeks post:8 week winter   | 1.242 | 1.265 | -0.02304  |
| 241                                | 4 weeks post winter:8 week winter vs. 8 weeks post winter:2 week winter | 1.191 | 1.248 | -0.05703  |
| 242                                | 4 weeks post winter:8 week winter vs. 8 weeks post winter:4 week winter | 1.191 | 1.184 | 0.006679  |
| 243                                | 4 weeks post winter:8 week winter vs. 8 weeks post winter:8 week winter | 1.191 | 1.217 | -0.02699  |
| 244                                | 4 weeks post winter:8 week winter vs. SPC -first long day:2 week winter | 1.191 | 1.231 | -0.04037  |
| 245                                | 4 weeks post winter:8 week winter vs. SPC -first long day:4 week winter | 1.191 | 1.192 | -0.00134  |
| 246                                | 4 weeks post winter:8 week winter vs. SPC -first long day:8 week winter | 1.191 | 1.187 | 0.003981  |
| 247                                | 4 weeks post winter:8 week winter vs. SPC -4 weeks post:2 week winter   | 1.191 | 1.223 | -0.03222  |
| 248                                | 4 weeks post winter:8 week winter vs. SPC -4 weeks post:4 week winter   | 1.191 | 1.187 | 0.003981  |
| 249                                | 4 weeks post winter:8 week winter vs. SPC -4 weeks post:8 week winter   | 1.191 | 1.248 | -0.05719  |
| 250                                | 4 weeks post winter:8 week winter vs. SPC -8 weeks post:2 week winter   | 1.191 | 1.326 | -0.1359   |
| 251                                | 4 weeks post winter:8 week winter vs. SPC -8 weeks post:4 week winter   | 1.191 | 1.248 | -0.05719  |
| 252                                | 4 weeks post winter:8 week winter vs. SPC -8 weeks post:8 week winter   | 1.191 | 1.265 | -0.07483  |
| 253                                | 8 weeks post winter:2 week winter vs. 8 weeks post winter:4 week winter | 1.248 | 1.184 | 0.06371   |
| 254                                | 8 weeks post winter:2 week winter vs. 8 weeks post winter:8 week winter | 1.248 | 1.217 | 0.03004   |
| 255                                | 8 weeks post winter:2 week winter vs. SPC -first long day:2 week winter | 1.248 | 1.231 | 0.01666   |
| 256                                | 8 weeks post winter:2 week winter vs. SPC -first long day:4 week winter | 1.248 | 1.192 | 0.05569   |
| 257                                | 8 weeks post winter:2 week winter vs. SPC -first long day:8 week winter | 1.248 | 1.187 | 0.06101   |
| 258                                | 8 weeks post winter:2 week winter vs. SPC -4 weeks post:2 week winter   | 1.248 | 1.223 | 0.02481   |
| 259                                | 8 weeks post winter:2 week winter vs. SPC -4 weeks post:4 week winter   | 1.248 | 1.187 | 0.06101   |
| 260                                | 8 weeks post winter:2 week winter vs. SPC -4 weeks post:8 week winter   | 1.248 | 1.248 | -0.00016  |
| 261                                | 8 weeks post winter:2 week winter vs. SPC -8 weeks post:2 week winter   | 1.248 | 1.326 | -0.07891  |
| 262                                | 8 weeks post winter:2 week winter vs. SPC -8 weeks post:4 week winter   | 1.248 | 1.248 | -0.00016  |
| 263                                | 8 weeks post winter:2 week winter vs. SPC -8 weeks post:8 week winter   | 1.248 | 1.265 | -0.0178   |
| 264                                | 8 weeks post winter:4 week winter vs. 8 weeks post winter:8 week winter | 1.184 | 1.217 | -0.03367  |
| 265                                | 8 weeks post winter:4 week winter vs. SPC -first long day:2 week winter | 1.184 | 1.231 | -0.04705  |
| 266                                | 8 weeks post winter:4 week winter vs. SPC -first long day:4 week winter | 1.184 | 1.192 | -0.008019 |
| 267                                | 8 weeks post winter:4 week winter vs. SPC -first long day:8 week winter | 1.184 | 1.187 | -0.002698 |
| 268                                | 8 weeks post winter:4 week winter vs. SPC -4 weeks post:2 week winter   | 1.184 | 1.223 | -0.0389   |
| 269                                | 8 weeks post winter:4 week winter vs. SPC -4 weeks post:4 week winter   | 1.184 | 1.187 | -0.002698 |
| 270                                | 8 weeks post winter:4 week winter vs. SPC -4 weeks post:8 week winter   | 1.184 | 1.248 | -0.06387  |

| 2way ANOVA<br>Multiple comparisons |                                                                         |       |       |           |
|------------------------------------|-------------------------------------------------------------------------|-------|-------|-----------|
| 271                                | 8 weeks post winter:4 week winter vs. SPC -8 weeks post:2 week winter   | 1.184 | 1.326 | -0.1426   |
| 272                                | 8 weeks post winter:4 week winter vs. SPC -8 weeks post:4 week winter   | 1.184 | 1.248 | -0.06387  |
| 273                                | 8 weeks post winter:4 week winter vs. SPC -8 weeks post:8 week winter   | 1.184 | 1.265 | -0.08151  |
| 274                                | 8 weeks post winter:8 week winter vs. SPC -first long day:2 week winter | 1.217 | 1.231 | -0.01338  |
| 275                                | 8 weeks post winter:8 week winter vs. SPC -first long day:4 week winter | 1.217 | 1.192 | 0.02565   |
| 276                                | 8 weeks post winter:8 week winter vs. SPC -first long day:8 week winter | 1.217 | 1.187 | 0.03097   |
| 277                                | 8 weeks post winter:8 week winter vs. SPC -4 weeks post:2 week winter   | 1.217 | 1.223 | -0.005226 |
| 278                                | 8 weeks post winter:8 week winter vs. SPC -4 weeks post:4 week winter   | 1.217 | 1.187 | 0.03097   |
| 279                                | 8 weeks post winter:8 week winter vs. SPC -4 weeks post:8 week winter   | 1.217 | 1.248 | -0.0302   |
| 280                                | 8 weeks post winter:8 week winter vs. SPC -8 weeks post:2 week winter   | 1.217 | 1.326 | -0.1089   |
| 281                                | 8 weeks post winter:8 week winter vs. SPC -8 weeks post:4 week winter   | 1.217 | 1.248 | -0.0302   |
| 282                                | 8 weeks post winter:8 week winter vs. SPC -8 weeks post:8 week winter   | 1.217 | 1.265 | -0.04784  |
| 283                                | SPC -first long day:2 week winter vs. SPC -first long day:4 week winter | 1.231 | 1.192 | 0.03903   |
| 284                                | SPC -first long day:2 week winter vs. SPC -first long day:8 week winter | 1.231 | 1.187 | 0.04435   |
| 285                                | SPC -first long day:2 week winter vs. SPC -4 weeks post:2 week winter   | 1.231 | 1.223 | 0.00815   |
| 286                                | SPC -first long day:2 week winter vs. SPC -4 weeks post:4 week winter   | 1.231 | 1.187 | 0.04435   |
| 287                                | SPC -first long day:2 week winter vs. SPC -4 weeks post:8 week winter   | 1.231 | 1.248 | -0.01682  |
| 288                                | SPC -first long day:2 week winter vs. SPC -8 weeks post:2 week winter   | 1.231 | 1.326 | -0.09557  |
| 289                                | SPC -first long day:2 week winter vs. SPC -8 weeks post:4 week winter   | 1.231 | 1.248 | -0.01682  |
| 290                                | SPC -first long day:2 week winter vs. SPC -8 weeks post:8 week winter   | 1.231 | 1.265 | -0.03446  |
| 291                                | SPC -first long day:4 week winter vs. SPC -first long day:8 week winter | 1.192 | 1.187 | 0.005321  |
| 292                                | SPC -first long day:4 week winter vs. SPC -4 weeks post:2 week winter   | 1.192 | 1.223 | -0.03088  |
| 293                                | SPC -first long day:4 week winter vs. SPC -4 weeks post:4 week winter   | 1.192 | 1.187 | 0.005321  |
| 294                                | SPC -first long day:4 week winter vs. SPC -4 weeks post:8 week winter   | 1.192 | 1.248 | -0.05585  |
| 295                                | SPC -first long day:4 week winter vs. SPC -8 weeks post:2 week winter   | 1.192 | 1.326 | -0.1346   |
| 296                                | SPC -first long day:4 week winter vs. SPC -8 weeks post:4 week winter   | 1.192 | 1.248 | -0.05585  |
| 297                                | SPC -first long day:4 week winter vs. SPC -8 weeks post:8 week winter   | 1.192 | 1.265 | -0.07349  |
| 298                                | SPC -first long day:8 week winter vs. SPC -4 weeks post:2 week winter   | 1.187 | 1.223 | -0.0362   |
| 299                                | SPC -first long day:8 week winter vs. SPC -4 weeks post:4 week winter   | 1.187 | 1.187 | 0         |
| 300                                | SPC -first long day:8 week winter vs. SPC -4 weeks post:8 week winter   | 1.187 | 1.248 | -0.06117  |
| 301                                | SPC -first long day:8 week winter vs. SPC -8 weeks post:2 week winter   | 1.187 | 1.326 | -0.1399   |
| 302                                | SPC -first long day:8 week winter vs. SPC -8 weeks post:4 week winter   | 1.187 | 1.248 | -0.06117  |
| 303                                | SPC -first long day:8 week winter vs. SPC -8 weeks post:8 week winter   | 1.187 | 1.265 | -0.07881  |
| 304                                | SPC -4 weeks post:2 week winter vs. SPC -4 weeks post:4 week winter     | 1.223 | 1.187 | 0.0362    |
| 305                                | SPC -4 weeks post:2 week winter vs. SPC -4 weeks post:8 week winter     | 1.223 | 1.248 | -0.02497  |
| 306                                | SPC -4 weeks post:2 week winter vs. SPC -8 weeks post:2 week winter     | 1.223 | 1.326 | -0.1037   |
| 307                                | SPC -4 weeks post:2 week winter vs. SPC -8 weeks post:4 week winter     | 1.223 | 1.248 | -0.02497  |
| 308                                | SPC -4 weeks post:2 week winter vs. SPC -8 weeks post:8 week winter     | 1.223 | 1.265 | -0.04261  |
| 309                                | SPC -4 weeks post:4 week winter vs. SPC -4 weeks post:8 week winter     | 1.187 | 1.248 | -0.06117  |
| 310                                | SPC -4 weeks post:4 week winter vs. SPC -8 weeks post:2 week winter     | 1.187 | 1.326 | -0.1399   |
| 311                                | SPC -4 weeks post:4 week winter vs. SPC -8 weeks post:4 week winter     | 1.187 | 1.248 | -0.06117  |
| 312                                | SPC -4 weeks post:4 week winter vs. SPC -8 weeks post:8 week winter     | 1.187 | 1.265 | -0.07881  |
| 313                                | SPC -4 weeks post:8 week winter vs. SPC -8 weeks post:2 week winter     | 1.248 | 1.326 | -0.07875  |
| 314                                | SPC -4 weeks post:8 week winter vs. SPC -8 weeks post:4 week winter     | 1.248 | 1.248 | 0         |
| 315                                | SPC -4 weeks post:8 week winter vs. SPC -8 weeks post:8 week winter     | 1.248 | 1.265 | -0.01764  |



| <b>2way ANOVA</b><br>Multiple comparisons |                                                                     |       |       |          |
|-------------------------------------------|---------------------------------------------------------------------|-------|-------|----------|
|                                           |                                                                     |       |       |          |
| <b>316</b>                                | SPC -8 weeks post:2 week winter vs. SPC -8 weeks post:4 week winter | 1.326 | 1.248 | 0.07875  |
| <b>317</b>                                | SPC -8 weeks post:2 week winter vs. SPC -8 weeks post:8 week winter | 1.326 | 1.265 | 0.06111  |
| <b>318</b>                                | SPC -8 weeks post:4 week winter vs. SPC -8 weeks post:8 week winter | 1.248 | 1.265 | -0.01764 |

| 1  |         |                  |  |  |  |
|----|---------|------------------|--|--|--|
| 2  |         |                  |  |  |  |
| 3  |         |                  |  |  |  |
| 4  |         |                  |  |  |  |
| 5  |         |                  |  |  |  |
| 6  |         |                  |  |  |  |
| 7  | Summary | Adjusted P Value |  |  |  |
| 8  |         |                  |  |  |  |
| 9  | ns      | 0.9785           |  |  |  |
| 10 | ns      | >0.9999          |  |  |  |
| 11 | ns      | >0.9999          |  |  |  |
| 12 | ns      | 0.5836           |  |  |  |
| 13 | ns      | >0.9999          |  |  |  |
| 14 | ns      | 0.4455           |  |  |  |
| 15 | ns      | >0.9999          |  |  |  |
| 16 | ns      | 0.9849           |  |  |  |
| 17 | ns      | 0.8507           |  |  |  |
| 18 | ns      | >0.9999          |  |  |  |
| 19 | ns      | >0.9999          |  |  |  |
| 20 | ns      | 0.9556           |  |  |  |
| 21 | ns      | >0.9999          |  |  |  |
| 22 | ns      | 0.4415           |  |  |  |
| 23 | ****    | <0.0001          |  |  |  |
| 24 | ns      | 0.4415           |  |  |  |
| 25 | ns      | 0.1153           |  |  |  |
| 26 | ns      | >0.9999          |  |  |  |
| 27 | ns      | 0.7331           |  |  |  |
| 28 | ns      | >0.9999          |  |  |  |
| 29 | ns      | >0.9999          |  |  |  |
| 30 | ns      | >0.9999          |  |  |  |
| 31 | ns      | 0.9987           |  |  |  |
| 32 | ns      | >0.9999          |  |  |  |
| 33 | ns      | >0.9999          |  |  |  |
| 34 | ns      | >0.9999          |  |  |  |
| 35 | ns      | 0.9995           |  |  |  |
| 36 | ns      | >0.9999          |  |  |  |
| 37 | ns      | 0.9995           |  |  |  |
| 38 | ns      | >0.9999          |  |  |  |
| 39 | *       | 0.0218           |  |  |  |
| 40 | ns      | >0.9999          |  |  |  |
| 41 | ns      | 0.9742           |  |  |  |
| 42 | ns      | 0.9966           |  |  |  |
| 43 | ns      | 0.9648           |  |  |  |
| 44 | ns      | >0.9999          |  |  |  |
| 45 | ns      | 0.9142           |  |  |  |

| 46 | ns   | >0.9999 |  |  |  |
|----|------|---------|--|--|--|
| 47 | ns   | >0.9999 |  |  |  |
| 48 | ns   | 0.9981  |  |  |  |
| 49 | ns   | >0.9999 |  |  |  |
| 50 | ns   | >0.9999 |  |  |  |
| 51 | ns   | >0.9999 |  |  |  |
| 52 | ns   | >0.9999 |  |  |  |
| 53 | ns   | 0.9122  |  |  |  |
| 54 | ***  | 0.0008  |  |  |  |
| 55 | ns   | 0.9122  |  |  |  |
| 56 | ns   | 0.5240  |  |  |  |
| 57 | ns   | 0.1897  |  |  |  |
| 58 | ns   | 0.9991  |  |  |  |
| 59 | ns   | 0.1198  |  |  |  |
| 60 | ns   | >0.9999 |  |  |  |
| 61 | ns   | 0.7692  |  |  |  |
| 62 | ns   | 0.4272  |  |  |  |
| 63 | ns   | 0.9985  |  |  |  |
| 64 | ns   | 0.9998  |  |  |  |
| 65 | ns   | 0.6411  |  |  |  |
| 66 | ns   | 0.9998  |  |  |  |
| 67 | ns   | 0.1180  |  |  |  |
| 68 | **** | <0.0001 |  |  |  |
| 69 | ns   | 0.1180  |  |  |  |
| 70 | *    | 0.0178  |  |  |  |
| 71 | ns   | 0.9297  |  |  |  |
| 72 | ns   | >0.9999 |  |  |  |
| 73 | ns   | 0.8273  |  |  |  |
| 74 | ns   | >0.9999 |  |  |  |
| 75 | ns   | >0.9999 |  |  |  |
| 76 | ns   | 0.9436  |  |  |  |
| 77 | ns   | 0.8754  |  |  |  |
| 78 | ns   | >0.9999 |  |  |  |
| 79 | ns   | 0.8754  |  |  |  |
| 80 | ns   | >0.9999 |  |  |  |
| 81 | ns   | 0.2207  |  |  |  |
| 82 | ns   | >0.9999 |  |  |  |
| 83 | ns   | >0.9999 |  |  |  |
| 84 | ns   | 0.8540  |  |  |  |
| 85 | ns   | >0.9999 |  |  |  |
| 86 | ns   | >0.9999 |  |  |  |
| 87 | ns   | 0.9937  |  |  |  |
| 88 | ns   | >0.9999 |  |  |  |
| 89 | ns   | >0.9999 |  |  |  |
| 90 | ns   | 0.9996  |  |  |  |

|            |     |         |  |  |  |
|------------|-----|---------|--|--|--|
|            |     |         |  |  |  |
|            |     |         |  |  |  |
|            |     |         |  |  |  |
|            |     |         |  |  |  |
| <b>91</b>  | ns  | >0.9999 |  |  |  |
| <b>92</b>  | ns  | 0.8512  |  |  |  |
| <b>93</b>  | *** | 0.0005  |  |  |  |
| <b>94</b>  | ns  | 0.8512  |  |  |  |
| <b>95</b>  | ns  | 0.4216  |  |  |  |
| <b>96</b>  | ns  | 0.7108  |  |  |  |
| <b>97</b>  | ns  | 0.9998  |  |  |  |
| <b>98</b>  | ns  | >0.9999 |  |  |  |
| <b>99</b>  | ns  | 0.8767  |  |  |  |
| <b>100</b> | ns  | 0.7741  |  |  |  |
| <b>101</b> | ns  | >0.9999 |  |  |  |
| <b>102</b> | ns  | 0.7741  |  |  |  |
| <b>103</b> | ns  | >0.9999 |  |  |  |
| <b>104</b> | ns  | 0.3249  |  |  |  |
| <b>105</b> | ns  | >0.9999 |  |  |  |
| <b>106</b> | ns  | >0.9999 |  |  |  |
| <b>107</b> | ns  | 0.9993  |  |  |  |
| <b>108</b> | ns  | 0.9698  |  |  |  |
| <b>109</b> | ns  | >0.9999 |  |  |  |
| <b>110</b> | ns  | >0.9999 |  |  |  |
| <b>111</b> | ns  | 0.9958  |  |  |  |
| <b>112</b> | ns  | >0.9999 |  |  |  |
| <b>113</b> | ns  | 0.7068  |  |  |  |
| <b>114</b> | *** | 0.0002  |  |  |  |
| <b>115</b> | ns  | 0.7068  |  |  |  |
| <b>116</b> | ns  | 0.2701  |  |  |  |
| <b>117</b> | ns  | >0.9999 |  |  |  |
| <b>118</b> | ns  | >0.9999 |  |  |  |
| <b>119</b> | ns  | 0.9998  |  |  |  |
| <b>120</b> | ns  | >0.9999 |  |  |  |
| <b>121</b> | ns  | 0.9998  |  |  |  |
| <b>122</b> | ns  | 0.9998  |  |  |  |
| <b>123</b> | *   | 0.0181  |  |  |  |
| <b>124</b> | ns  | 0.9998  |  |  |  |
| <b>125</b> | ns  | 0.9648  |  |  |  |
| <b>126</b> | ns  | 0.9957  |  |  |  |
| <b>127</b> | ns  | 0.9830  |  |  |  |
| <b>128</b> | ns  | >0.9999 |  |  |  |
| <b>129</b> | ns  | 0.9830  |  |  |  |
| <b>130</b> | ns  | >0.9999 |  |  |  |
| <b>131</b> | ns  | 0.0791  |  |  |  |
| <b>132</b> | ns  | >0.9999 |  |  |  |
| <b>133</b> | ns  | 0.9990  |  |  |  |
| <b>134</b> | ns  | >0.9999 |  |  |  |
| <b>135</b> | ns  | 0.9998  |  |  |  |

|     |             |         |    |        |     |
|-----|-------------|---------|----|--------|-----|
|     |             |         |    |        |     |
|     |             |         |    |        |     |
|     |             |         |    |        |     |
|     |             |         |    |        |     |
| 136 | ns          | >0.9999 |    |        |     |
| 137 | ns          | 0.8741  |    |        |     |
| 138 | ***         | 0.0006  |    |        |     |
| 139 | ns          | 0.8741  |    |        |     |
| 140 | ns          | 0.4557  |    |        |     |
| 141 | ns          | 0.9982  |    |        |     |
| 142 | ns          | >0.9999 |    |        |     |
| 143 | ns          | 0.7705  |    |        |     |
| 144 | ***         | 0.0002  |    |        |     |
| 145 | ns          | 0.7705  |    |        |     |
| 146 | ns          | 0.3271  |    |        |     |
| 147 | ns          | 0.9982  |    |        |     |
| 148 | ns          | >0.9999 |    |        |     |
| 149 | *           | 0.0332  |    |        |     |
| 150 | ns          | >0.9999 |    |        |     |
| 151 | ns          | 0.9887  |    |        |     |
| 152 | ns          | 0.7705  |    |        |     |
| 153 | ***         | 0.0002  |    |        |     |
| 154 | ns          | 0.7705  |    |        |     |
| 155 | ns          | 0.3271  |    |        |     |
| 156 | ns          | 0.3285  |    |        |     |
| 157 | ns          | >0.9999 |    |        |     |
| 158 | ns          | >0.9999 |    |        |     |
| 159 | ns          | 0.3285  |    |        |     |
| 160 | ns          | 0.7719  |    |        |     |
| 161 | ns          | >0.9999 |    |        |     |
| 162 |             |         |    |        |     |
| 163 |             |         |    |        |     |
| 164 | SE of diff. | N1      | N2 | q      | DF  |
| 165 |             |         |    |        |     |
| 166 | 0.0282      | 10      | 10 | 2.277  | 162 |
| 167 | 0.0282      | 10      | 10 | 1.043  | 162 |
| 168 | 0.0282      | 10      | 10 | 0.8719 | 162 |
| 169 | 0.0282      | 10      | 10 | 3.442  | 162 |
| 170 | 0.0282      | 10      | 10 | 0.845  | 162 |
| 171 | 0.0282      | 10      | 10 | 3.705  | 162 |
| 172 | 0.0282      | 10      | 10 | 0.5101 | 162 |
| 173 | 0.0282      | 10      | 10 | 2.199  | 162 |
| 174 | 0.0282      | 10      | 10 | 2.869  | 162 |
| 175 | 0.0282      | 10      | 10 | 0.9122 | 162 |
| 176 | 0.0282      | 10      | 10 | 0.6454 | 162 |
| 177 | 0.0282      | 10      | 10 | 2.461  | 162 |
| 178 | 0.0282      | 10      | 10 | 0.6454 | 162 |
| 179 | 0.0282      | 10      | 10 | 3.713  | 162 |
| 180 | 0.0282      | 10      | 10 | 7.662  | 162 |

|            |        |    |    |         |     |
|------------|--------|----|----|---------|-----|
|            |        |    |    |         |     |
|            |        |    |    |         |     |
|            |        |    |    |         |     |
| <b>181</b> | 0.0282 | 10 | 10 | 3.713   | 162 |
| <b>182</b> | 0.0282 | 10 | 10 | 4.597   | 162 |
| <b>183</b> | 0.0282 | 10 | 10 | 1.234   | 162 |
| <b>184</b> | 0.0282 | 10 | 10 | 3.149   | 162 |
| <b>185</b> | 0.0282 | 10 | 10 | 1.165   | 162 |
| <b>186</b> | 0.0282 | 10 | 10 | 1.432   | 162 |
| <b>187</b> | 0.0282 | 10 | 10 | 1.428   | 162 |
| <b>188</b> | 0.0282 | 10 | 10 | 1.767   | 162 |
| <b>189</b> | 0.0282 | 10 | 10 | 0.07826 | 162 |
| <b>190</b> | 0.0282 | 10 | 10 | 0.5925  | 162 |
| <b>191</b> | 0.0282 | 10 | 10 | 1.365   | 162 |
| <b>192</b> | 0.0282 | 10 | 10 | 1.631   | 162 |
| <b>193</b> | 0.0282 | 10 | 10 | 0.1838  | 162 |
| <b>194</b> | 0.0282 | 10 | 10 | 1.631   | 162 |
| <b>195</b> | 0.0282 | 10 | 10 | 1.436   | 162 |
| <b>196</b> | 0.0282 | 10 | 10 | 5.385   | 162 |
| <b>197</b> | 0.0282 | 10 | 10 | 1.436   | 162 |
| <b>198</b> | 0.0282 | 10 | 10 | 2.321   | 162 |
| <b>199</b> | 0.0282 | 10 | 10 | 1.915   | 162 |
| <b>200</b> | 0.0282 | 10 | 10 | 2.399   | 162 |
| <b>201</b> | 0.0282 | 10 | 10 | 0.1981  | 162 |
| <b>202</b> | 0.0282 | 10 | 10 | 2.662   | 162 |
| <b>203</b> | 0.0282 | 10 | 10 | 0.533   | 162 |
| <b>204</b> | 0.0282 | 10 | 10 | 1.155   | 162 |
| <b>205</b> | 0.0282 | 10 | 10 | 1.826   | 162 |
| <b>206</b> | 0.0282 | 10 | 10 | 0.1309  | 162 |
| <b>207</b> | 0.0282 | 10 | 10 | 0.3977  | 162 |
| <b>208</b> | 0.0282 | 10 | 10 | 1.418   | 162 |
| <b>209</b> | 0.0282 | 10 | 10 | 0.3977  | 162 |
| <b>210</b> | 0.0282 | 10 | 10 | 2.67    | 162 |
| <b>211</b> | 0.0282 | 10 | 10 | 6.619   | 162 |
| <b>212</b> | 0.0282 | 10 | 10 | 2.67    | 162 |
| <b>213</b> | 0.0282 | 10 | 10 | 3.554   | 162 |
| <b>214</b> | 0.0282 | 10 | 10 | 4.314   | 162 |
| <b>215</b> | 0.0282 | 10 | 10 | 1.717   | 162 |
| <b>216</b> | 0.0282 | 10 | 10 | 4.577   | 162 |
| <b>217</b> | 0.0282 | 10 | 10 | 1.382   | 162 |
| <b>218</b> | 0.0282 | 10 | 10 | 3.07    | 162 |
| <b>219</b> | 0.0282 | 10 | 10 | 3.741   | 162 |
| <b>220</b> | 0.0282 | 10 | 10 | 1.784   | 162 |
| <b>221</b> | 0.0282 | 10 | 10 | 1.517   | 162 |
| <b>222</b> | 0.0282 | 10 | 10 | 3.333   | 162 |
| <b>223</b> | 0.0282 | 10 | 10 | 1.517   | 162 |
| <b>224</b> | 0.0282 | 10 | 10 | 4.585   | 162 |
| <b>225</b> | 0.0282 | 10 | 10 | 8.534   | 162 |

|            |        |    |    |          |     |
|------------|--------|----|----|----------|-----|
|            |        |    |    |          |     |
|            |        |    |    |          |     |
|            |        |    |    |          |     |
| <b>226</b> | 0.0282 | 10 | 10 | 4.585    | 162 |
| <b>227</b> | 0.0282 | 10 | 10 | 5.469    | 162 |
| <b>228</b> | 0.0282 | 10 | 10 | 2.597    | 162 |
| <b>229</b> | 0.0282 | 10 | 10 | 0.2631   | 162 |
| <b>230</b> | 0.0282 | 10 | 10 | 2.932    | 162 |
| <b>231</b> | 0.0282 | 10 | 10 | 1.243    | 162 |
| <b>232</b> | 0.0282 | 10 | 10 | 0.5726   | 162 |
| <b>233</b> | 0.0282 | 10 | 10 | 2.53     | 162 |
| <b>234</b> | 0.0282 | 10 | 10 | 2.797    | 162 |
| <b>235</b> | 0.0282 | 10 | 10 | 0.9813   | 162 |
| <b>236</b> | 0.0282 | 10 | 10 | 2.797    | 162 |
| <b>237</b> | 0.0282 | 10 | 10 | 0.2711   | 162 |
| <b>238</b> | 0.0282 | 10 | 10 | 4.22     | 162 |
| <b>239</b> | 0.0282 | 10 | 10 | 0.2711   | 162 |
| <b>240</b> | 0.0282 | 10 | 10 | 1.155    | 162 |
| <b>241</b> | 0.0282 | 10 | 10 | 2.86     | 162 |
| <b>242</b> | 0.0282 | 10 | 10 | 0.335    | 162 |
| <b>243</b> | 0.0282 | 10 | 10 | 1.354    | 162 |
| <b>244</b> | 0.0282 | 10 | 10 | 2.024    | 162 |
| <b>245</b> | 0.0282 | 10 | 10 | 0.06718  | 162 |
| <b>246</b> | 0.0282 | 10 | 10 | 0.1997   | 162 |
| <b>247</b> | 0.0282 | 10 | 10 | 1.616    | 162 |
| <b>248</b> | 0.0282 | 10 | 10 | 0.1997   | 162 |
| <b>249</b> | 0.0282 | 10 | 10 | 2.868    | 162 |
| <b>250</b> | 0.0282 | 10 | 10 | 6.817    | 162 |
| <b>251</b> | 0.0282 | 10 | 10 | 2.868    | 162 |
| <b>252</b> | 0.0282 | 10 | 10 | 3.752    | 162 |
| <b>253</b> | 0.0282 | 10 | 10 | 3.195    | 162 |
| <b>254</b> | 0.0282 | 10 | 10 | 1.506    | 162 |
| <b>255</b> | 0.0282 | 10 | 10 | 0.8357   | 162 |
| <b>256</b> | 0.0282 | 10 | 10 | 2.793    | 162 |
| <b>257</b> | 0.0282 | 10 | 10 | 3.06     | 162 |
| <b>258</b> | 0.0282 | 10 | 10 | 1.244    | 162 |
| <b>259</b> | 0.0282 | 10 | 10 | 3.06     | 162 |
| <b>260</b> | 0.0282 | 10 | 10 | 0.008023 | 162 |
| <b>261</b> | 0.0282 | 10 | 10 | 3.957    | 162 |
| <b>262</b> | 0.0282 | 10 | 10 | 0.008023 | 162 |
| <b>263</b> | 0.0282 | 10 | 10 | 0.8924   | 162 |
| <b>264</b> | 0.0282 | 10 | 10 | 1.689    | 162 |
| <b>265</b> | 0.0282 | 10 | 10 | 2.359    | 162 |
| <b>266</b> | 0.0282 | 10 | 10 | 0.4021   | 162 |
| <b>267</b> | 0.0282 | 10 | 10 | 0.1353   | 162 |
| <b>268</b> | 0.0282 | 10 | 10 | 1.951    | 162 |
| <b>269</b> | 0.0282 | 10 | 10 | 0.1353   | 162 |
| <b>270</b> | 0.0282 | 10 | 10 | 3.203    | 162 |

|            |        |    |    |        |     |
|------------|--------|----|----|--------|-----|
|            |        |    |    |        |     |
|            |        |    |    |        |     |
|            |        |    |    |        |     |
| <b>271</b> | 0.0282 | 10 | 10 | 7.152  | 162 |
| <b>272</b> | 0.0282 | 10 | 10 | 3.203  | 162 |
| <b>273</b> | 0.0282 | 10 | 10 | 4.087  | 162 |
| <b>274</b> | 0.0282 | 10 | 10 | 0.6708 | 162 |
| <b>275</b> | 0.0282 | 10 | 10 | 1.286  | 162 |
| <b>276</b> | 0.0282 | 10 | 10 | 1.553  | 162 |
| <b>277</b> | 0.0282 | 10 | 10 | 0.2621 | 162 |
| <b>278</b> | 0.0282 | 10 | 10 | 1.553  | 162 |
| <b>279</b> | 0.0282 | 10 | 10 | 1.514  | 162 |
| <b>280</b> | 0.0282 | 10 | 10 | 5.463  | 162 |
| <b>281</b> | 0.0282 | 10 | 10 | 1.514  | 162 |
| <b>282</b> | 0.0282 | 10 | 10 | 2.399  | 162 |
| <b>283</b> | 0.0282 | 10 | 10 | 1.957  | 162 |
| <b>284</b> | 0.0282 | 10 | 10 | 2.224  | 162 |
| <b>285</b> | 0.0282 | 10 | 10 | 0.4087 | 162 |
| <b>286</b> | 0.0282 | 10 | 10 | 2.224  | 162 |
| <b>287</b> | 0.0282 | 10 | 10 | 0.8437 | 162 |
| <b>288</b> | 0.0282 | 10 | 10 | 4.793  | 162 |
| <b>289</b> | 0.0282 | 10 | 10 | 0.8437 | 162 |
| <b>290</b> | 0.0282 | 10 | 10 | 1.728  | 162 |
| <b>291</b> | 0.0282 | 10 | 10 | 0.2668 | 162 |
| <b>292</b> | 0.0282 | 10 | 10 | 1.548  | 162 |
| <b>293</b> | 0.0282 | 10 | 10 | 0.2668 | 162 |
| <b>294</b> | 0.0282 | 10 | 10 | 2.801  | 162 |
| <b>295</b> | 0.0282 | 10 | 10 | 6.75   | 162 |
| <b>296</b> | 0.0282 | 10 | 10 | 2.801  | 162 |
| <b>297</b> | 0.0282 | 10 | 10 | 3.685  | 162 |
| <b>298</b> | 0.0282 | 10 | 10 | 1.815  | 162 |
| <b>299</b> | 0.0282 | 10 | 10 | 0      | 162 |
| <b>300</b> | 0.0282 | 10 | 10 | 3.068  | 162 |
| <b>301</b> | 0.0282 | 10 | 10 | 7.017  | 162 |
| <b>302</b> | 0.0282 | 10 | 10 | 3.068  | 162 |
| <b>303</b> | 0.0282 | 10 | 10 | 3.952  | 162 |
| <b>304</b> | 0.0282 | 10 | 10 | 1.815  | 162 |
| <b>305</b> | 0.0282 | 10 | 10 | 1.252  | 162 |
| <b>306</b> | 0.0282 | 10 | 10 | 5.201  | 162 |
| <b>307</b> | 0.0282 | 10 | 10 | 1.252  | 162 |
| <b>308</b> | 0.0282 | 10 | 10 | 2.137  | 162 |
| <b>309</b> | 0.0282 | 10 | 10 | 3.068  | 162 |
| <b>310</b> | 0.0282 | 10 | 10 | 7.017  | 162 |
| <b>311</b> | 0.0282 | 10 | 10 | 3.068  | 162 |
| <b>312</b> | 0.0282 | 10 | 10 | 3.952  | 162 |
| <b>313</b> | 0.0282 | 10 | 10 | 3.949  | 162 |
| <b>314</b> | 0.0282 | 10 | 10 | 0      | 162 |
| <b>315</b> | 0.0282 | 10 | 10 | 0.8843 | 162 |



|            |        |    |    |        |     |
|------------|--------|----|----|--------|-----|
|            |        |    |    |        |     |
|            |        |    |    |        |     |
|            |        |    |    |        |     |
| <b>316</b> | 0.0282 | 10 | 10 | 3.949  | 162 |
| <b>317</b> | 0.0282 | 10 | 10 | 3.065  | 162 |
| <b>318</b> | 0.0282 | 10 | 10 | 0.8843 | 162 |

Data analyzed: Condition factor FW grouped format

| <u>Source of Variation</u> | <u>Degrees of Freedom</u> | <u>Sum of Squares</u> | <u>Mean square</u> |
|----------------------------|---------------------------|-----------------------|--------------------|
| Pretreatment               | 2                         | 0.00637               | 0.003185           |
| Treatment                  | 5                         | 0.1504                | 0.03008            |
| Interaction                | 10                        | 0.1266                | 0.01266            |
| Residual (error)           | 162                       | 0.6442                | 0.003977           |
| Total                      | 179                       | 0.9276                |                    |

Does Pretreatment have the same effect at all values of Treatment?

Interaction accounts for 13.65% of the total variance.

F = 3.18. DF<sub>n</sub>=10 DF<sub>d</sub>=162

The P value = 0.0009

If there is no interaction overall, there is a 0.093% chance of randomly observing so much interaction in an experiment of this size. The interaction is considered extremely significant.

Since the interaction is statistically significant, the P values that follow for the row and column effects are difficult to interpret.

Does Pretreatment affect the result?

Pretreatment accounts for 0.69% of the total variance.

F = 0.80. DF<sub>n</sub>=2 DF<sub>d</sub>=162

The P value = 0.4507

If Pretreatment has no effect overall, there is a 45% chance of randomly observing an effect this big (or bigger) in an experiment of this size. The effect is considered not significant.

Does Treatment affect the result?

Treatment accounts for 16.21% of the total variance.

F = 7.56. DF<sub>n</sub>=5 DF<sub>d</sub>=162

The P value is < 0.0001

If Treatment has no effect overall, there is a less than 0.01% chance of randomly observing an this big (or bigger) in an experiment of this size. The effect is considered extremely significant.

| 2way ANOVA<br>Tabular results |                          |                                    |         |                 |
|-------------------------------|--------------------------|------------------------------------|---------|-----------------|
| 1                             | Table Analyzed           | Condition factor SW grouped format |         |                 |
| 2                             |                          |                                    |         |                 |
| 3                             | Two-way ANOVA            | Ordinary                           |         |                 |
| 4                             | Alpha                    | 0.05                               |         |                 |
| 5                             |                          |                                    |         |                 |
| 6                             | Source of Variation      | % of total variation               | P value | P value summary |
| 7                             | Interaction              | 2.549                              | 0.0906  | ns              |
| 8                             | Treatment                | 9.465                              | <0.0001 | ****            |
| 9                             | Pretreatment             | 6.338                              | <0.0001 | ****            |
| 10                            |                          |                                    |         |                 |
| 11                            | ANOVA table              | SS (Type III)                      | DF      | MS              |
| 12                            | Interaction              | 0.04026                            | 4       | 0.01007         |
| 13                            | Treatment                | 0.1495                             | 2       | 0.07475         |
| 14                            | Pretreatment             | 0.1001                             | 2       | 0.05005         |
| 15                            | Residual                 | 1.289                              | 260     | 0.004959        |
| 16                            |                          |                                    |         |                 |
| 17                            | Number of missing values | 1                                  |         |                 |

|           |                    |          |
|-----------|--------------------|----------|
|           |                    |          |
|           |                    |          |
|           |                    |          |
| <b>1</b>  |                    |          |
| <b>2</b>  |                    |          |
| <b>3</b>  |                    |          |
| <b>4</b>  |                    |          |
| <b>5</b>  |                    |          |
| <b>6</b>  | Significant?       |          |
| <b>7</b>  | No                 |          |
| <b>8</b>  | Yes                |          |
| <b>9</b>  | Yes                |          |
| <b>10</b> |                    |          |
| <b>11</b> | F (DFn, DFd)       | P value  |
| <b>12</b> | F (4, 260) = 2.03  | P=0.0906 |
| <b>13</b> | F (2, 260) = 15.07 | P<0.0001 |
| <b>14</b> | F (2, 260) = 10.09 | P<0.0001 |
| <b>15</b> |                    |          |
| <b>16</b> |                    |          |
| <b>17</b> |                    |          |

| 2way ANOVA<br>Multiple comparisons |                                                   |            |                      |              |         |
|------------------------------------|---------------------------------------------------|------------|----------------------|--------------|---------|
| 1                                  | Compare cell means regardless of rows and columns |            |                      |              |         |
| 2                                  |                                                   |            |                      |              |         |
| 3                                  | Number of families                                | 1          |                      |              |         |
| 4                                  | Number of comparisons per family                  | 36         |                      |              |         |
| 5                                  | Alpha                                             | 0.05       |                      |              |         |
| 6                                  |                                                   |            |                      |              |         |
| 7                                  | Tukey's multiple comparisons test                 | Mean Diff. | 95.00% CI of diff.   | Significant? | Summary |
| 8                                  |                                                   |            |                      |              |         |
| 9                                  | SW_1:2 week winter vs. SW_1:4 week winter         | 0.01896    | -0.03792 to 0.07583  | No           | ns      |
| 10                                 | SW_1:2 week winter vs. SW_1:8 week winter         | 0.05924    | 0.002369 to 0.1161   | Yes          | *       |
| 11                                 | SW_1:2 week winter vs. SW_2:2 week winter         | 0.07014    | 0.01278 to 0.1275    | Yes          | **      |
| 12                                 | SW_1:2 week winter vs. SW_2:4 week winter         | 0.0607     | 0.003829 to 0.1176   | Yes          | *       |
| 13                                 | SW_1:2 week winter vs. SW_2:8 week winter         | 0.102      | 0.04515 to 0.1589    | Yes          | ****    |
| 14                                 | SW_1:2 week winter vs. SW_3:2 week winter         | 0.0892     | 0.03232 to 0.1461    | Yes          | ****    |
| 15                                 | SW_1:2 week winter vs. SW_3:4 week winter         | 0.03874    | -0.01813 to 0.09562  | No           | ns      |
| 16                                 | SW_1:2 week winter vs. SW_3:8 week winter         | 0.09492    | 0.03805 to 0.1518    | Yes          | ****    |
| 17                                 | SW_1:4 week winter vs. SW_1:8 week winter         | 0.04029    | -0.01659 to 0.09716  | No           | ns      |
| 18                                 | SW_1:4 week winter vs. SW_2:2 week winter         | 0.05119    | -0.006177 to 0.1085  | No           | ns      |
| 19                                 | SW_1:4 week winter vs. SW_2:4 week winter         | 0.04175    | -0.01513 to 0.09862  | No           | ns      |
| 20                                 | SW_1:4 week winter vs. SW_2:8 week winter         | 0.08307    | 0.02619 to 0.1399    | Yes          | ***     |
| 21                                 | SW_1:4 week winter vs. SW_3:2 week winter         | 0.07024    | 0.01337 to 0.1271    | Yes          | **      |
| 22                                 | SW_1:4 week winter vs. SW_3:4 week winter         | 0.01978    | -0.03709 to 0.07666  | No           | ns      |
| 23                                 | SW_1:4 week winter vs. SW_3:8 week winter         | 0.07596    | 0.01909 to 0.1328    | Yes          | **      |
| 24                                 | SW_1:8 week winter vs. SW_2:2 week winter         | 0.0109     | -0.04646 to 0.06826  | No           | ns      |
| 25                                 | SW_1:8 week winter vs. SW_2:4 week winter         | 0.001461   | -0.05541 to 0.05834  | No           | ns      |
| 26                                 | SW_1:8 week winter vs. SW_2:8 week winter         | 0.04278    | -0.01409 to 0.09966  | No           | ns      |
| 27                                 | SW_1:8 week winter vs. SW_3:2 week winter         | 0.02996    | -0.02692 to 0.08683  | No           | ns      |
| 28                                 | SW_1:8 week winter vs. SW_3:4 week winter         | -0.0205    | -0.07738 to 0.03637  | No           | ns      |
| 29                                 | SW_1:8 week winter vs. SW_3:8 week winter         | 0.03568    | -0.0212 to 0.09255   | No           | ns      |
| 30                                 | SW_2:2 week winter vs. SW_2:4 week winter         | -0.009439  | -0.0668 to 0.04792   | No           | ns      |
| 31                                 | SW_2:2 week winter vs. SW_2:8 week winter         | 0.03188    | -0.02548 to 0.08924  | No           | ns      |
| 32                                 | SW_2:2 week winter vs. SW_3:2 week winter         | 0.01906    | -0.03831 to 0.07642  | No           | ns      |
| 33                                 | SW_2:2 week winter vs. SW_3:4 week winter         | -0.0314    | -0.08876 to 0.02596  | No           | ns      |
| 34                                 | SW_2:2 week winter vs. SW_3:8 week winter         | 0.02478    | -0.03259 to 0.08214  | No           | ns      |
| 35                                 | SW_2:4 week winter vs. SW_2:8 week winter         | 0.04132    | -0.01555 to 0.09819  | No           | ns      |
| 36                                 | SW_2:4 week winter vs. SW_3:2 week winter         | 0.0285     | -0.02838 to 0.08537  | No           | ns      |
| 37                                 | SW_2:4 week winter vs. SW_3:4 week winter         | -0.02196   | -0.07884 to 0.03491  | No           | ns      |
| 38                                 | SW_2:4 week winter vs. SW_3:8 week winter         | 0.03422    | -0.02266 to 0.09109  | No           | ns      |
| 39                                 | SW_2:8 week winter vs. SW_3:2 week winter         | -0.01282   | -0.0697 to 0.04405   | No           | ns      |
| 40                                 | SW_2:8 week winter vs. SW_3:4 week winter         | -0.06328   | -0.1202 to -0.006408 | Yes          | *       |
| 41                                 | SW_2:8 week winter vs. SW_3:8 week winter         | -0.007104  | -0.06398 to 0.04977  | No           | ns      |
| 42                                 | SW_3:2 week winter vs. SW_3:4 week winter         | -0.05046   | -0.1073 to 0.006417  | No           | ns      |
| 43                                 | SW_3:2 week winter vs. SW_3:8 week winter         | 0.005721   | -0.05115 to 0.0626   | No           | ns      |
| 44                                 | SW_3:4 week winter vs. SW_3:8 week winter         | 0.05618    | -0.0006958 to 0.1131 | No           | ns      |
| 45                                 |                                                   |            |                      |              |         |

| 2way ANOVA<br>Multiple comparisons |                                           |        |        |            |             |
|------------------------------------|-------------------------------------------|--------|--------|------------|-------------|
| 46                                 |                                           |        |        |            |             |
| 47                                 | Test details                              | Mean 1 | Mean 2 | Mean Diff. | SE of diff. |
| 48                                 |                                           |        |        |            |             |
| 49                                 | SW_1:2 week winter vs. SW_1:4 week winter | 1.276  | 1.257  | 0.01896    | 0.01818     |
| 50                                 | SW_1:2 week winter vs. SW_1:8 week winter | 1.276  | 1.216  | 0.05924    | 0.01818     |
| 51                                 | SW_1:2 week winter vs. SW_2:2 week winter | 1.276  | 1.205  | 0.07014    | 0.01834     |
| 52                                 | SW_1:2 week winter vs. SW_2:4 week winter | 1.276  | 1.215  | 0.0607     | 0.01818     |
| 53                                 | SW_1:2 week winter vs. SW_2:8 week winter | 1.276  | 1.174  | 0.102      | 0.01818     |
| 54                                 | SW_1:2 week winter vs. SW_3:2 week winter | 1.276  | 1.186  | 0.0892     | 0.01818     |
| 55                                 | SW_1:2 week winter vs. SW_3:4 week winter | 1.276  | 1.237  | 0.03874    | 0.01818     |
| 56                                 | SW_1:2 week winter vs. SW_3:8 week winter | 1.276  | 1.181  | 0.09492    | 0.01818     |
| 57                                 | SW_1:4 week winter vs. SW_1:8 week winter | 1.257  | 1.216  | 0.04029    | 0.01818     |
| 58                                 | SW_1:4 week winter vs. SW_2:2 week winter | 1.257  | 1.205  | 0.05119    | 0.01834     |
| 59                                 | SW_1:4 week winter vs. SW_2:4 week winter | 1.257  | 1.215  | 0.04175    | 0.01818     |
| 60                                 | SW_1:4 week winter vs. SW_2:8 week winter | 1.257  | 1.174  | 0.08307    | 0.01818     |
| 61                                 | SW_1:4 week winter vs. SW_3:2 week winter | 1.257  | 1.186  | 0.07024    | 0.01818     |
| 62                                 | SW_1:4 week winter vs. SW_3:4 week winter | 1.257  | 1.237  | 0.01978    | 0.01818     |
| 63                                 | SW_1:4 week winter vs. SW_3:8 week winter | 1.257  | 1.181  | 0.07596    | 0.01818     |
| 64                                 | SW_1:8 week winter vs. SW_2:2 week winter | 1.216  | 1.205  | 0.0109     | 0.01834     |
| 65                                 | SW_1:8 week winter vs. SW_2:4 week winter | 1.216  | 1.215  | 0.001461   | 0.01818     |
| 66                                 | SW_1:8 week winter vs. SW_2:8 week winter | 1.216  | 1.174  | 0.04278    | 0.01818     |
| 67                                 | SW_1:8 week winter vs. SW_3:2 week winter | 1.216  | 1.186  | 0.02996    | 0.01818     |
| 68                                 | SW_1:8 week winter vs. SW_3:4 week winter | 1.216  | 1.237  | -0.0205    | 0.01818     |
| 69                                 | SW_1:8 week winter vs. SW_3:8 week winter | 1.216  | 1.181  | 0.03568    | 0.01818     |
| 70                                 | SW_2:2 week winter vs. SW_2:4 week winter | 1.205  | 1.215  | -0.009439  | 0.01834     |
| 71                                 | SW_2:2 week winter vs. SW_2:8 week winter | 1.205  | 1.174  | 0.03188    | 0.01834     |
| 72                                 | SW_2:2 week winter vs. SW_3:2 week winter | 1.205  | 1.186  | 0.01906    | 0.01834     |
| 73                                 | SW_2:2 week winter vs. SW_3:4 week winter | 1.205  | 1.237  | -0.0314    | 0.01834     |
| 74                                 | SW_2:2 week winter vs. SW_3:8 week winter | 1.205  | 1.181  | 0.02478    | 0.01834     |
| 75                                 | SW_2:4 week winter vs. SW_2:8 week winter | 1.215  | 1.174  | 0.04132    | 0.01818     |
| 76                                 | SW_2:4 week winter vs. SW_3:2 week winter | 1.215  | 1.186  | 0.0285     | 0.01818     |
| 77                                 | SW_2:4 week winter vs. SW_3:4 week winter | 1.215  | 1.237  | -0.02196   | 0.01818     |
| 78                                 | SW_2:4 week winter vs. SW_3:8 week winter | 1.215  | 1.181  | 0.03422    | 0.01818     |
| 79                                 | SW_2:8 week winter vs. SW_3:2 week winter | 1.174  | 1.186  | -0.01282   | 0.01818     |
| 80                                 | SW_2:8 week winter vs. SW_3:4 week winter | 1.174  | 1.237  | -0.06328   | 0.01818     |
| 81                                 | SW_2:8 week winter vs. SW_3:8 week winter | 1.174  | 1.181  | -0.007104  | 0.01818     |
| 82                                 | SW_3:2 week winter vs. SW_3:4 week winter | 1.186  | 1.237  | -0.05046   | 0.01818     |
| 83                                 | SW_3:2 week winter vs. SW_3:8 week winter | 1.186  | 1.181  | 0.005721   | 0.01818     |
| 84                                 | SW_3:4 week winter vs. SW_3:8 week winter | 1.237  | 1.181  | 0.05618    | 0.01818     |

|    |                  |  |  |  |
|----|------------------|--|--|--|
|    |                  |  |  |  |
|    |                  |  |  |  |
|    |                  |  |  |  |
| 1  |                  |  |  |  |
| 2  |                  |  |  |  |
| 3  |                  |  |  |  |
| 4  |                  |  |  |  |
| 5  |                  |  |  |  |
| 6  |                  |  |  |  |
| 7  | Adjusted P Value |  |  |  |
| 8  |                  |  |  |  |
| 9  | 0.9813           |  |  |  |
| 10 | 0.0340           |  |  |  |
| 11 | 0.0051           |  |  |  |
| 12 | 0.0265           |  |  |  |
| 13 | <0.0001          |  |  |  |
| 14 | <0.0001          |  |  |  |
| 15 | 0.4547           |  |  |  |
| 16 | <0.0001          |  |  |  |
| 17 | 0.3986           |  |  |  |
| 18 | 0.1230           |  |  |  |
| 19 | 0.3483           |  |  |  |
| 20 | 0.0003           |  |  |  |
| 21 | 0.0044           |  |  |  |
| 22 | 0.9755           |  |  |  |
| 23 | 0.0013           |  |  |  |
| 24 | 0.9996           |  |  |  |
| 25 | >0.9999          |  |  |  |
| 26 | 0.3148           |  |  |  |
| 27 | 0.7774           |  |  |  |
| 28 | 0.9696           |  |  |  |
| 29 | 0.5711           |  |  |  |
| 30 | 0.9999           |  |  |  |
| 31 | 0.7221           |  |  |  |
| 32 | 0.9817           |  |  |  |
| 33 | 0.7385           |  |  |  |
| 34 | 0.9146           |  |  |  |
| 35 | 0.3627           |  |  |  |
| 36 | 0.8216           |  |  |  |
| 37 | 0.9542           |  |  |  |
| 38 | 0.6268           |  |  |  |
| 39 | 0.9987           |  |  |  |
| 40 | 0.0168           |  |  |  |
| 41 | >0.9999          |  |  |  |
| 42 | 0.1279           |  |  |  |
| 43 | >0.9999          |  |  |  |
| 44 | 0.0558           |  |  |  |
| 45 |                  |  |  |  |

| 46 |    |    |        |     |
|----|----|----|--------|-----|
| 47 | N1 | N2 | q      | DF  |
| 48 |    |    |        |     |
| 49 | 30 | 30 | 1.474  | 260 |
| 50 | 30 | 30 | 4.608  | 260 |
| 51 | 30 | 29 | 5.409  | 260 |
| 52 | 30 | 30 | 4.722  | 260 |
| 53 | 30 | 30 | 7.936  | 260 |
| 54 | 30 | 30 | 6.938  | 260 |
| 55 | 30 | 30 | 3.013  | 260 |
| 56 | 30 | 30 | 7.383  | 260 |
| 57 | 30 | 30 | 3.134  | 260 |
| 58 | 30 | 29 | 3.948  | 260 |
| 59 | 30 | 30 | 3.247  | 260 |
| 60 | 30 | 30 | 6.461  | 260 |
| 61 | 30 | 30 | 5.464  | 260 |
| 62 | 30 | 30 | 1.539  | 260 |
| 63 | 30 | 30 | 5.909  | 260 |
| 64 | 30 | 29 | 0.8406 | 260 |
| 65 | 30 | 30 | 0.1136 | 260 |
| 66 | 30 | 30 | 3.328  | 260 |
| 67 | 30 | 30 | 2.33   | 260 |
| 68 | 30 | 30 | 1.595  | 260 |
| 69 | 30 | 30 | 2.775  | 260 |
| 70 | 29 | 30 | 0.7279 | 260 |
| 71 | 29 | 30 | 2.459  | 260 |
| 72 | 29 | 30 | 1.47   | 260 |
| 73 | 29 | 30 | 2.422  | 260 |
| 74 | 29 | 30 | 1.911  | 260 |
| 75 | 30 | 30 | 3.214  | 260 |
| 76 | 30 | 30 | 2.216  | 260 |
| 77 | 30 | 30 | 1.708  | 260 |
| 78 | 30 | 30 | 2.661  | 260 |
| 79 | 30 | 30 | 0.9975 | 260 |
| 80 | 30 | 30 | 4.922  | 260 |
| 81 | 30 | 30 | 0.5525 | 260 |
| 82 | 30 | 30 | 3.925  | 260 |
| 83 | 30 | 30 | 0.445  | 260 |
| 84 | 30 | 30 | 4.37   | 260 |



Data analyzed: Condition factor SW grouped format

| <u>Source of Variation</u> | <u>Degrees of Freedom</u> | <u>Sum of Squares</u> | <u>Mean square</u> |
|----------------------------|---------------------------|-----------------------|--------------------|
| Pretreatment               | 2                         | 0.1001                | 0.05005            |
| Treatment                  | 2                         | 0.1495                | 0.07475            |
| Interaction                | 4                         | 0.04026               | 0.01007            |
| Residual (error)           | 260                       | 1.289                 | 0.004959           |
| Total                      | 268                       |                       |                    |

Does Pretreatment have the same effect at all values of Treatment?

Interaction accounts for approximately 2.55% of the total variance.

F = 2.03. DF<sub>n</sub>=4 DF<sub>d</sub>=260

The P value = 0.0906

If there is no interaction overall, there is a 9.1% chance of randomly observing so much interaction in an experiment of this size. The interaction is considered not quite significant.

Does Pretreatment affect the result?

Pretreatment accounts for approximately 6.34% of the total variance.

F = 10.09. DF<sub>n</sub>=2 DF<sub>d</sub>=260

The P value is < 0.0001

If Pretreatment has no effect overall, there is a less than 0.01% chance of randomly observing an effect this big (or bigger) in an experiment of this size. The effect is considered extremely significant.

Does Treatment affect the result?

Treatment accounts for approximately 9.47% of the total variance.

F = 15.07. DF<sub>n</sub>=2 DF<sub>d</sub>=260

The P value is < 0.0001

If Treatment has no effect overall, there is a less than 0.01% chance of randomly observing an effect this big (or bigger) in an experiment of this size. The effect is considered extremely significant.
