# Supplementary material for: RNA profiling identifies novel, photoperiod-history dependent markers associated with enhanced saltwater performance in juvenile Atlantic salmon
Source: PubMed Central journal article supplement (PMC7141700; doi:10.1371/journal.pone.0227496), 2020-04-08
Supplement: pone.0227496.s007.pdf [file pone.0227496.s007.pdf]

| 2way ANOVA<br>Tabular results |                          |                         |         |                 |                   |          |
|-------------------------------|--------------------------|-------------------------|---------|-----------------|-------------------|----------|
| 1                             | Table Analyzed           | Cand.genes 2013 NKA a1b |         |                 |                   |          |
| 2                             |                          |                         |         |                 |                   |          |
| 3                             | Two-way ANOVA            | Ordinary                |         |                 |                   |          |
| 4                             | Alpha                    | 0.05                    |         |                 |                   |          |
| 5                             |                          |                         |         |                 |                   |          |
| 6                             | Source of Variation      | % of total variation    | P value | P value summary | Significant?      |          |
| 7                             | Interaction              | 22.93                   | <0.0001 | ****            | Yes               |          |
| 8                             | Time                     | 18.46                   | <0.0001 | ****            | Yes               |          |
| 9                             | Treatment                | 45.88                   | <0.0001 | ****            | Yes               |          |
| 10                            |                          |                         |         |                 |                   |          |
| 11                            | ANOVA table              | SS (Type III)           | DF      | MS              | F (DFn, DFd)      | P value  |
| 12                            | Interaction              | 3200212                 | 4       | 800053          | F (4, 44) = 27.78 | P<0.0001 |
| 13                            | Time                     | 2575743                 | 2       | 1287872         | F (2, 44) = 44.72 | P<0.0001 |
| 14                            | Treatment                | 6402464                 | 2       | 3201232         | F (2, 44) = 111.2 | P<0.0001 |
| 15                            | Residual                 | 1267089                 | 44      | 28797           |                   |          |
| 16                            |                          |                         |         |                 |                   |          |
| 17                            | Number of missing values | 1                       |         |                 |                   |          |

| 2way ANOVA<br>Multiple comparisons |                                                   |            |                    |              |         |
|------------------------------------|---------------------------------------------------|------------|--------------------|--------------|---------|
| 1                                  | Compare cell means regardless of rows and columns |            |                    |              |         |
| 2                                  |                                                   |            |                    |              |         |
| 3                                  | Number of families                                | 1          |                    |              |         |
| 4                                  | Number of comparisons per family                  | 36         |                    |              |         |
| 5                                  | Alpha                                             | 0.05       |                    |              |         |
| 6                                  |                                                   |            |                    |              |         |
| 7                                  | Tukey's multiple comparisons test                 | Mean Diff. | 95.00% CI of diff. | Significant? | Summary |
| 8                                  |                                                   |            |                    |              |         |
| 9                                  | 68:LL vs. 68:SP                                   | 351.4      | 31.9 to 670.8      | Yes          | *       |
| 10                                 | 68:LL vs. 68:SPLL                                 | 230.6      | -104.5 to 565.6    | No           | ns      |
| 11                                 | 68:LL vs. 89:LL                                   | -170.2     | -489.7 to 149.3    | No           | ns      |
| 12                                 | 68:LL vs. 89:SP                                   | 225.1      | -94.34 to 544.6    | No           | ns      |
| 13                                 | 68:LL vs. 89:SPLL                                 | -984.4     | -1304 to -665      | Yes          | ****    |
| 14                                 | 68:LL vs. 110:LL                                  | 44.45      | -275 to 363.9      | No           | ns      |
| 15                                 | 68:LL vs. 110:SP                                  | 224.1      | -95.36 to 543.6    | No           | ns      |
| 16                                 | 68:LL vs. 110:SPLL                                | -992.7     | -1312 to -673.2    | Yes          | ****    |
| 17                                 | 68:SP vs. 68:SPLL                                 | -120.8     | -455.9 to 214.3    | No           | ns      |
| 18                                 | 68:SP vs. 89:LL                                   | -521.6     | -841.1 to -202.1   | Yes          | ***     |
| 19                                 | 68:SP vs. 89:SP                                   | -126.2     | -445.7 to 193.2    | No           | ns      |
| 20                                 | 68:SP vs. 89:SPLL                                 | -1336      | -1655 to -1016     | Yes          | ****    |
| 21                                 | 68:SP vs. 110:LL                                  | -306.9     | -626.4 to 12.56    | No           | ns      |
| 22                                 | 68:SP vs. 110:SP                                  | -127.3     | -446.7 to 192.2    | No           | ns      |
| 23                                 | 68:SP vs. 110:SPLL                                | -1344      | -1664 to -1025     | Yes          | ****    |
| 24                                 | 68:SPLL vs. 89:LL                                 | -400.8     | -735.9 to -65.73   | Yes          | **      |
| 25                                 | 68:SPLL vs. 89:SP                                 | -5.439     | -340.5 to 329.6    | No           | ns      |
| 26                                 | 68:SPLL vs. 89:SPLL                               | -1215      | -1550 to -879.9    | Yes          | ****    |
| 27                                 | 68:SPLL vs. 110:LL                                | -186.1     | -521.2 to 148.9    | No           | ns      |
| 28                                 | 68:SPLL vs. 110:SP                                | -6.455     | -341.5 to 328.6    | No           | ns      |
| 29                                 | 68:SPLL vs. 110:SPLL                              | -1223      | -1558 to -888.2    | Yes          | ****    |
| 30                                 | 89:LL vs. 89:SP                                   | 395.4      | 75.88 to 714.8     | Yes          | **      |
| 31                                 | 89:LL vs. 89:SPLL                                 | -814.2     | -1134 to -494.7    | Yes          | ****    |
| 32                                 | 89:LL vs. 110:LL                                  | 214.7      | -104.8 to 534.1    | No           | ns      |
| 33                                 | 89:LL vs. 110:SP                                  | 394.3      | 74.86 to 713.8     | Yes          | **      |
| 34                                 | 89:LL vs. 110:SPLL                                | -822.5     | -1142 to -503      | Yes          | ****    |
| 35                                 | 89:SP vs. 89:SPLL                                 | -1210      | -1529 to -890.1    | Yes          | ****    |
| 36                                 | 89:SP vs. 110:LL                                  | -180.7     | -500.2 to 138.8    | No           | ns      |
| 37                                 | 89:SP vs. 110:SP                                  | -1.016     | -320.5 to 318.5    | No           | ns      |
| 38                                 | 89:SP vs. 110:SPLL                                | -1218      | -1537 to -898.4    | Yes          | ****    |
| 39                                 | 89:SPLL vs. 110:LL                                | 1029       | 709.4 to 1348      | Yes          | ****    |
| 40                                 | 89:SPLL vs. 110:SP                                | 1209       | 889.1 to 1528      | Yes          | ****    |
| 41                                 | 89:SPLL vs. 110:SPLL                              | -8.289     | -327.8 to 311.2    | No           | ns      |
| 42                                 | 110:LL vs. 110:SP                                 | 179.7      | -139.8 to 499.1    | No           | ns      |
| 43                                 | 110:LL vs. 110:SPLL                               | -1037      | -1357 to -717.7    | Yes          | ****    |
| 44                                 | 110:SP vs. 110:SPLL                               | -1217      | -1536 to -897.4    | Yes          | ****    |
| 45                                 |                                                   |            |                    |              |         |

| 2way ANOVA<br>Multiple comparisons |                      |        |        |            |             |
|------------------------------------|----------------------|--------|--------|------------|-------------|
| 46                                 |                      |        |        |            |             |
| 47                                 | Test details         | Mean 1 | Mean 2 | Mean Diff. | SE of diff. |
| 48                                 |                      |        |        |            |             |
| 49                                 | 68:LL vs. 68:SP      | 503.5  | 152.2  | 351.4      | 97.98       |
| 50                                 | 68:LL vs. 68:SPLL    | 503.5  | 273    | 230.6      | 102.8       |
| 51                                 | 68:LL vs. 89:LL      | 503.5  | 673.8  | -170.2     | 97.98       |
| 52                                 | 68:LL vs. 89:SP      | 503.5  | 278.4  | 225.1      | 97.98       |
| 53                                 | 68:LL vs. 89:SPLL    | 503.5  | 1488   | -984.4     | 97.98       |
| 54                                 | 68:LL vs. 110:LL     | 503.5  | 459.1  | 44.45      | 97.98       |
| 55                                 | 68:LL vs. 110:SP     | 503.5  | 279.4  | 224.1      | 97.98       |
| 56                                 | 68:LL vs. 110:SPLL   | 503.5  | 1496   | -992.7     | 97.98       |
| 57                                 | 68:SP vs. 68:SPLL    | 152.2  | 273    | -120.8     | 102.8       |
| 58                                 | 68:SP vs. 89:LL      | 152.2  | 673.8  | -521.6     | 97.98       |
| 59                                 | 68:SP vs. 89:SP      | 152.2  | 278.4  | -126.2     | 97.98       |
| 60                                 | 68:SP vs. 89:SPLL    | 152.2  | 1488   | -1336      | 97.98       |
| 61                                 | 68:SP vs. 110:LL     | 152.2  | 459.1  | -306.9     | 97.98       |
| 62                                 | 68:SP vs. 110:SP     | 152.2  | 279.4  | -127.3     | 97.98       |
| 63                                 | 68:SP vs. 110:SPLL   | 152.2  | 1496   | -1344      | 97.98       |
| 64                                 | 68:SPLL vs. 89:LL    | 273    | 673.8  | -400.8     | 102.8       |
| 65                                 | 68:SPLL vs. 89:SP    | 273    | 278.4  | -5.439     | 102.8       |
| 66                                 | 68:SPLL vs. 89:SPLL  | 273    | 1488   | -1215      | 102.8       |
| 67                                 | 68:SPLL vs. 110:LL   | 273    | 459.1  | -186.1     | 102.8       |
| 68                                 | 68:SPLL vs. 110:SP   | 273    | 279.4  | -6.455     | 102.8       |
| 69                                 | 68:SPLL vs. 110:SPLL | 273    | 1496   | -1223      | 102.8       |
| 70                                 | 89:LL vs. 89:SP      | 673.8  | 278.4  | 395.4      | 97.98       |
| 71                                 | 89:LL vs. 89:SPLL    | 673.8  | 1488   | -814.2     | 97.98       |
| 72                                 | 89:LL vs. 110:LL     | 673.8  | 459.1  | 214.7      | 97.98       |
| 73                                 | 89:LL vs. 110:SP     | 673.8  | 279.4  | 394.3      | 97.98       |
| 74                                 | 89:LL vs. 110:SPLL   | 673.8  | 1496   | -822.5     | 97.98       |
| 75                                 | 89:SP vs. 89:SPLL    | 278.4  | 1488   | -1210      | 97.98       |
| 76                                 | 89:SP vs. 110:LL     | 278.4  | 459.1  | -180.7     | 97.98       |
| 77                                 | 89:SP vs. 110:SP     | 278.4  | 279.4  | -1.016     | 97.98       |
| 78                                 | 89:SP vs. 110:SPLL   | 278.4  | 1496   | -1218      | 97.98       |
| 79                                 | 89:SPLL vs. 110:LL   | 1488   | 459.1  | 1029       | 97.98       |
| 80                                 | 89:SPLL vs. 110:SP   | 1488   | 279.4  | 1209       | 97.98       |
| 81                                 | 89:SPLL vs. 110:SPLL | 1488   | 1496   | -8.289     | 97.98       |
| 82                                 | 110:LL vs. 110:SP    | 459.1  | 279.4  | 179.7      | 97.98       |
| 83                                 | 110:LL vs. 110:SPLL  | 459.1  | 1496   | -1037      | 97.98       |
| 84                                 | 110:SP vs. 110:SPLL  | 279.4  | 1496   | -1217      | 97.98       |

|           |                  |  |  |  |
|-----------|------------------|--|--|--|
|           |                  |  |  |  |
|           |                  |  |  |  |
|           |                  |  |  |  |
| <b>1</b>  |                  |  |  |  |
| <b>2</b>  |                  |  |  |  |
| <b>3</b>  |                  |  |  |  |
| <b>4</b>  |                  |  |  |  |
| <b>5</b>  |                  |  |  |  |
| <b>6</b>  |                  |  |  |  |
| <b>7</b>  | Adjusted P Value |  |  |  |
| <b>8</b>  |                  |  |  |  |
| <b>9</b>  | 0.0215           |  |  |  |
| <b>10</b> | 0.3970           |  |  |  |
| <b>11</b> | 0.7208           |  |  |  |
| <b>12</b> | 0.3654           |  |  |  |
| <b>13</b> | <0.0001          |  |  |  |
| <b>14</b> | >0.9999          |  |  |  |
| <b>15</b> | 0.3713           |  |  |  |
| <b>16</b> | <0.0001          |  |  |  |
| <b>17</b> | 0.9575           |  |  |  |
| <b>18</b> | 0.0001           |  |  |  |
| <b>19</b> | 0.9295           |  |  |  |
| <b>20</b> | <0.0001          |  |  |  |
| <b>21</b> | 0.0683           |  |  |  |
| <b>22</b> | 0.9264           |  |  |  |
| <b>23</b> | <0.0001          |  |  |  |
| <b>24</b> | 0.0090           |  |  |  |
| <b>25</b> | >0.9999          |  |  |  |
| <b>26</b> | <0.0001          |  |  |  |
| <b>27</b> | 0.6747           |  |  |  |
| <b>28</b> | >0.9999          |  |  |  |
| <b>29</b> | <0.0001          |  |  |  |
| <b>30</b> | 0.0061           |  |  |  |
| <b>31</b> | <0.0001          |  |  |  |
| <b>32</b> | 0.4289           |  |  |  |
| <b>33</b> | 0.0063           |  |  |  |
| <b>34</b> | <0.0001          |  |  |  |
| <b>35</b> | <0.0001          |  |  |  |
| <b>36</b> | 0.6536           |  |  |  |
| <b>37</b> | >0.9999          |  |  |  |
| <b>38</b> | <0.0001          |  |  |  |
| <b>39</b> | <0.0001          |  |  |  |
| <b>40</b> | <0.0001          |  |  |  |
| <b>41</b> | >0.9999          |  |  |  |
| <b>42</b> | 0.6603           |  |  |  |
| <b>43</b> | <0.0001          |  |  |  |
| <b>44</b> | <0.0001          |  |  |  |
| <b>45</b> |                  |  |  |  |

|           |    |    |         |    |
|-----------|----|----|---------|----|
|           |    |    |         |    |
|           |    |    |         |    |
|           |    |    |         |    |
|           |    |    |         |    |
| <b>46</b> |    |    |         |    |
| <b>47</b> | N1 | N2 | q       | DF |
| <b>48</b> |    |    |         |    |
| <b>49</b> | 6  | 6  | 5.072   | 44 |
| <b>50</b> | 6  | 5  | 3.173   | 44 |
| <b>51</b> | 6  | 6  | 2.457   | 44 |
| <b>52</b> | 6  | 6  | 3.25    | 44 |
| <b>53</b> | 6  | 6  | 14.21   | 44 |
| <b>54</b> | 6  | 6  | 0.6417  | 44 |
| <b>55</b> | 6  | 6  | 3.235   | 44 |
| <b>56</b> | 6  | 6  | 14.33   | 44 |
| <b>57</b> | 6  | 5  | 1.663   | 44 |
| <b>58</b> | 6  | 6  | 7.529   | 44 |
| <b>59</b> | 6  | 6  | 1.822   | 44 |
| <b>60</b> | 6  | 6  | 19.28   | 44 |
| <b>61</b> | 6  | 6  | 4.43    | 44 |
| <b>62</b> | 6  | 6  | 1.837   | 44 |
| <b>63</b> | 6  | 6  | 19.4    | 44 |
| <b>64</b> | 5  | 6  | 5.516   | 44 |
| <b>65</b> | 5  | 6  | 0.07486 | 44 |
| <b>66</b> | 5  | 6  | 16.72   | 44 |
| <b>67</b> | 5  | 6  | 2.561   | 44 |
| <b>68</b> | 5  | 6  | 0.08884 | 44 |
| <b>69</b> | 5  | 6  | 16.84   | 44 |
| <b>70</b> | 6  | 6  | 5.707   | 44 |
| <b>71</b> | 6  | 6  | 11.75   | 44 |
| <b>72</b> | 6  | 6  | 3.099   | 44 |
| <b>73</b> | 6  | 6  | 5.692   | 44 |
| <b>74</b> | 6  | 6  | 11.87   | 44 |
| <b>75</b> | 6  | 6  | 17.46   | 44 |
| <b>76</b> | 6  | 6  | 2.608   | 44 |
| <b>77</b> | 6  | 6  | 0.01466 | 44 |
| <b>78</b> | 6  | 6  | 17.58   | 44 |
| <b>79</b> | 6  | 6  | 14.85   | 44 |
| <b>80</b> | 6  | 6  | 17.44   | 44 |
| <b>81</b> | 6  | 6  | 0.1196  | 44 |
| <b>82</b> | 6  | 6  | 2.593   | 44 |
| <b>83</b> | 6  | 6  | 14.97   | 44 |
| <b>84</b> | 6  | 6  | 17.56   | 44 |

| 2way ANOVA<br>Tabular results |                          |                        |         |                 |                   |          |
|-------------------------------|--------------------------|------------------------|---------|-----------------|-------------------|----------|
| 1                             | Table Analyzed           | Cand.genes 2013 CFTR I |         |                 |                   |          |
| 2                             |                          |                        |         |                 |                   |          |
| 3                             | Two-way ANOVA            | Ordinary               |         |                 |                   |          |
| 4                             | Alpha                    | 0.05                   |         |                 |                   |          |
| 5                             |                          |                        |         |                 |                   |          |
| 6                             | Source of Variation      | % of total variation   | P value | P value summary | Significant?      |          |
| 7                             | Interaction              | 20.15                  | <0.0001 | ****            | Yes               |          |
| 8                             | Time                     | 23.96                  | <0.0001 | ****            | Yes               |          |
| 9                             | Treatment                | 43.5                   | <0.0001 | ****            | Yes               |          |
| 10                            |                          |                        |         |                 |                   |          |
| 11                            | ANOVA table              | SS (Type III)          | DF      | MS              | F (DFn, DFd)      | P value  |
| 12                            | Interaction              | 17475                  | 4       | 4369            | F (4, 44) = 21.62 | P<0.0001 |
| 13                            | Time                     | 20779                  | 2       | 10390           | F (2, 44) = 51.41 | P<0.0001 |
| 14                            | Treatment                | 37729                  | 2       | 18865           | F (2, 44) = 93.34 | P<0.0001 |
| 15                            | Residual                 | 8893                   | 44      | 202.1           |                   |          |
| 16                            |                          |                        |         |                 |                   |          |
| 17                            | Number of missing values | 1                      |         |                 |                   |          |

| 2way ANOVA<br>Multiple comparisons |                                                   |            |                    |              |         |
|------------------------------------|---------------------------------------------------|------------|--------------------|--------------|---------|
| 1                                  | Compare cell means regardless of rows and columns |            |                    |              |         |
| 2                                  |                                                   |            |                    |              |         |
| 3                                  | Number of families                                | 1          |                    |              |         |
| 4                                  | Number of comparisons per family                  | 36         |                    |              |         |
| 5                                  | Alpha                                             | 0.05       |                    |              |         |
| 6                                  |                                                   |            |                    |              |         |
| 7                                  | Tukey's multiple comparisons test                 | Mean Diff. | 95.00% CI of diff. | Significant? | Summary |
| 8                                  |                                                   |            |                    |              |         |
| 9                                  | 68:LL vs. 68:SP                                   | 47.93      | 21.17 to 74.69     | Yes          | ****    |
| 10                                 | 68:LL vs. 68:SPLL                                 | 38.37      | 10.3 to 66.44      | Yes          | **      |
| 11                                 | 68:LL vs. 89:LL                                   | -14.34     | -41.1 to 12.43     | No           | ns      |
| 12                                 | 68:LL vs. 89:SP                                   | 35.01      | 8.249 to 61.78     | Yes          | **      |
| 13                                 | 68:LL vs. 89:SPLL                                 | -60.36     | -87.13 to -33.6    | Yes          | ****    |
| 14                                 | 68:LL vs. 110:LL                                  | -10.06     | -36.82 to 16.71    | No           | ns      |
| 15                                 | 68:LL vs. 110:SP                                  | 26.85      | 0.08768 to 53.61   | Yes          | *       |
| 16                                 | 68:LL vs. 110:SPLL                                | -59.61     | -86.37 to -32.84   | Yes          | ****    |
| 17                                 | 68:SP vs. 68:SPLL                                 | -9.556     | -37.63 to 18.51    | No           | ns      |
| 18                                 | 68:SP vs. 89:LL                                   | -62.27     | -89.03 to -35.5    | Yes          | ****    |
| 19                                 | 68:SP vs. 89:SP                                   | -12.92     | -39.68 to 13.85    | No           | ns      |
| 20                                 | 68:SP vs. 89:SPLL                                 | -108.3     | -135.1 to -81.53   | Yes          | ****    |
| 21                                 | 68:SP vs. 110:LL                                  | -57.98     | -84.75 to -31.22   | Yes          | ****    |
| 22                                 | 68:SP vs. 110:SP                                  | -21.08     | -47.84 to 5.686    | No           | ns      |
| 23                                 | 68:SP vs. 110:SPLL                                | -107.5     | -134.3 to -80.77   | Yes          | ****    |
| 24                                 | 68:SPLL vs. 89:LL                                 | -52.71     | -80.78 to -24.64   | Yes          | ****    |
| 25                                 | 68:SPLL vs. 89:SP                                 | -3.36      | -31.43 to 24.71    | No           | ns      |
| 26                                 | 68:SPLL vs. 89:SPLL                               | -98.74     | -126.8 to -70.67   | Yes          | ****    |
| 27                                 | 68:SPLL vs. 110:LL                                | -48.43     | -76.5 to -20.36    | Yes          | ****    |
| 28                                 | 68:SPLL vs. 110:SP                                | -11.52     | -39.59 to 16.55    | No           | ns      |
| 29                                 | 68:SPLL vs. 110:SPLL                              | -97.98     | -126.1 to -69.91   | Yes          | ****    |
| 30                                 | 89:LL vs. 89:SP                                   | 49.35      | 22.59 to 76.11     | Yes          | ****    |
| 31                                 | 89:LL vs. 89:SPLL                                 | -46.03     | -72.79 to -19.26   | Yes          | ****    |
| 32                                 | 89:LL vs. 110:LL                                  | 4.281      | -22.48 to 31.04    | No           | ns      |
| 33                                 | 89:LL vs. 110:SP                                  | 41.19      | 14.42 to 67.95     | Yes          | ***     |
| 34                                 | 89:LL vs. 110:SPLL                                | -45.27     | -72.03 to -18.51   | Yes          | ****    |
| 35                                 | 89:SP vs. 89:SPLL                                 | -95.38     | -122.1 to -68.61   | Yes          | ****    |
| 36                                 | 89:SP vs. 110:LL                                  | -45.07     | -71.83 to -18.31   | Yes          | ****    |
| 37                                 | 89:SP vs. 110:SP                                  | -8.162     | -34.93 to 18.6     | No           | ns      |
| 38                                 | 89:SP vs. 110:SPLL                                | -94.62     | -121.4 to -67.86   | Yes          | ****    |
| 39                                 | 89:SPLL vs. 110:LL                                | 50.31      | 23.54 to 77.07     | Yes          | ****    |
| 40                                 | 89:SPLL vs. 110:SP                                | 87.22      | 60.45 to 114       | Yes          | ****    |
| 41                                 | 89:SPLL vs. 110:SPLL                              | 0.7564     | -26.01 to 27.52    | No           | ns      |
| 42                                 | 110:LL vs. 110:SP                                 | 36.91      | 10.14 to 63.67     | Yes          | **      |
| 43                                 | 110:LL vs. 110:SPLL                               | -49.55     | -76.32 to -22.79   | Yes          | ****    |
| 44                                 | 110:SP vs. 110:SPLL                               | -86.46     | -113.2 to -59.7    | Yes          | ****    |
| 45                                 |                                                   |            |                    |              |         |

| 2way ANOVA<br>Multiple comparisons |                      |        |        |            |             |
|------------------------------------|----------------------|--------|--------|------------|-------------|
| 46                                 |                      |        |        |            |             |
| 47                                 | Test details         | Mean 1 | Mean 2 | Mean Diff. | SE of diff. |
| 48                                 |                      |        |        |            |             |
| 49                                 | 68:LL vs. 68:SP      | 58.84  | 10.92  | 47.93      | 8.208       |
| 50                                 | 68:LL vs. 68:SPLL    | 58.84  | 20.47  | 38.37      | 8.608       |
| 51                                 | 68:LL vs. 89:LL      | 58.84  | 73.18  | -14.34     | 8.208       |
| 52                                 | 68:LL vs. 89:SP      | 58.84  | 23.83  | 35.01      | 8.208       |
| 53                                 | 68:LL vs. 89:SPLL    | 58.84  | 119.2  | -60.36     | 8.208       |
| 54                                 | 68:LL vs. 110:LL     | 58.84  | 68.9   | -10.06     | 8.208       |
| 55                                 | 68:LL vs. 110:SP     | 58.84  | 31.99  | 26.85      | 8.208       |
| 56                                 | 68:LL vs. 110:SPLL   | 58.84  | 118.5  | -59.61     | 8.208       |
| 57                                 | 68:SP vs. 68:SPLL    | 10.92  | 20.47  | -9.556     | 8.608       |
| 58                                 | 68:SP vs. 89:LL      | 10.92  | 73.18  | -62.27     | 8.208       |
| 59                                 | 68:SP vs. 89:SP      | 10.92  | 23.83  | -12.92     | 8.208       |
| 60                                 | 68:SP vs. 89:SPLL    | 10.92  | 119.2  | -108.3     | 8.208       |
| 61                                 | 68:SP vs. 110:LL     | 10.92  | 68.9   | -57.98     | 8.208       |
| 62                                 | 68:SP vs. 110:SP     | 10.92  | 31.99  | -21.08     | 8.208       |
| 63                                 | 68:SP vs. 110:SPLL   | 10.92  | 118.5  | -107.5     | 8.208       |
| 64                                 | 68:SPLL vs. 89:LL    | 20.47  | 73.18  | -52.71     | 8.608       |
| 65                                 | 68:SPLL vs. 89:SP    | 20.47  | 23.83  | -3.36      | 8.608       |
| 66                                 | 68:SPLL vs. 89:SPLL  | 20.47  | 119.2  | -98.74     | 8.608       |
| 67                                 | 68:SPLL vs. 110:LL   | 20.47  | 68.9   | -48.43     | 8.608       |
| 68                                 | 68:SPLL vs. 110:SP   | 20.47  | 31.99  | -11.52     | 8.608       |
| 69                                 | 68:SPLL vs. 110:SPLL | 20.47  | 118.5  | -97.98     | 8.608       |
| 70                                 | 89:LL vs. 89:SP      | 73.18  | 23.83  | 49.35      | 8.208       |
| 71                                 | 89:LL vs. 89:SPLL    | 73.18  | 119.2  | -46.03     | 8.208       |
| 72                                 | 89:LL vs. 110:LL     | 73.18  | 68.9   | 4.281      | 8.208       |
| 73                                 | 89:LL vs. 110:SP     | 73.18  | 31.99  | 41.19      | 8.208       |
| 74                                 | 89:LL vs. 110:SPLL   | 73.18  | 118.5  | -45.27     | 8.208       |
| 75                                 | 89:SP vs. 89:SPLL    | 23.83  | 119.2  | -95.38     | 8.208       |
| 76                                 | 89:SP vs. 110:LL     | 23.83  | 68.9   | -45.07     | 8.208       |
| 77                                 | 89:SP vs. 110:SP     | 23.83  | 31.99  | -8.162     | 8.208       |
| 78                                 | 89:SP vs. 110:SPLL   | 23.83  | 118.5  | -94.62     | 8.208       |
| 79                                 | 89:SPLL vs. 110:LL   | 119.2  | 68.9   | 50.31      | 8.208       |
| 80                                 | 89:SPLL vs. 110:SP   | 119.2  | 31.99  | 87.22      | 8.208       |
| 81                                 | 89:SPLL vs. 110:SPLL | 119.2  | 118.5  | 0.7564     | 8.208       |
| 82                                 | 110:LL vs. 110:SP    | 68.9   | 31.99  | 36.91      | 8.208       |
| 83                                 | 110:LL vs. 110:SPLL  | 68.9   | 118.5  | -49.55     | 8.208       |
| 84                                 | 110:SP vs. 110:SPLL  | 31.99  | 118.5  | -86.46     | 8.208       |



|           |                  |  |  |  |
|-----------|------------------|--|--|--|
|           |                  |  |  |  |
|           |                  |  |  |  |
|           |                  |  |  |  |
| <b>1</b>  |                  |  |  |  |
| <b>2</b>  |                  |  |  |  |
| <b>3</b>  |                  |  |  |  |
| <b>4</b>  |                  |  |  |  |
| <b>5</b>  |                  |  |  |  |
| <b>6</b>  |                  |  |  |  |
| <b>7</b>  | Adjusted P Value |  |  |  |
| <b>8</b>  |                  |  |  |  |
| <b>9</b>  | <0.0001          |  |  |  |
| <b>10</b> | 0.0017           |  |  |  |
| <b>11</b> | 0.7151           |  |  |  |
| <b>12</b> | 0.0031           |  |  |  |
| <b>13</b> | <0.0001          |  |  |  |
| <b>14</b> | 0.9464           |  |  |  |
| <b>15</b> | 0.0487           |  |  |  |
| <b>16</b> | <0.0001          |  |  |  |
| <b>17</b> | 0.9696           |  |  |  |
| <b>18</b> | <0.0001          |  |  |  |
| <b>19</b> | 0.8135           |  |  |  |
| <b>20</b> | <0.0001          |  |  |  |
| <b>21</b> | <0.0001          |  |  |  |
| <b>22</b> | 0.2294           |  |  |  |
| <b>23</b> | <0.0001          |  |  |  |
| <b>24</b> | <0.0001          |  |  |  |
| <b>25</b> | >0.9999          |  |  |  |
| <b>26</b> | <0.0001          |  |  |  |
| <b>27</b> | <0.0001          |  |  |  |
| <b>28</b> | 0.9139           |  |  |  |
| <b>29</b> | <0.0001          |  |  |  |
| <b>30</b> | <0.0001          |  |  |  |
| <b>31</b> | <0.0001          |  |  |  |
| <b>32</b> | 0.9998           |  |  |  |
| <b>33</b> | 0.0003           |  |  |  |
| <b>34</b> | <0.0001          |  |  |  |
| <b>35</b> | <0.0001          |  |  |  |
| <b>36</b> | <0.0001          |  |  |  |
| <b>37</b> | 0.9845           |  |  |  |
| <b>38</b> | <0.0001          |  |  |  |
| <b>39</b> | <0.0001          |  |  |  |
| <b>40</b> | <0.0001          |  |  |  |
| <b>41</b> | >0.9999          |  |  |  |
| <b>42</b> | 0.0015           |  |  |  |
| <b>43</b> | <0.0001          |  |  |  |
| <b>44</b> | <0.0001          |  |  |  |
| <b>45</b> |                  |  |  |  |

|           |    |    |        |    |
|-----------|----|----|--------|----|
|           |    |    |        |    |
|           |    |    |        |    |
|           |    |    |        |    |
| <b>46</b> |    |    |        |    |
| <b>47</b> | N1 | N2 | q      | DF |
| <b>48</b> |    |    |        |    |
| <b>49</b> | 6  | 6  | 8.258  | 44 |
| <b>50</b> | 6  | 5  | 6.304  | 44 |
| <b>51</b> | 6  | 6  | 2.47   | 44 |
| <b>52</b> | 6  | 6  | 6.033  | 44 |
| <b>53</b> | 6  | 6  | 10.4   | 44 |
| <b>54</b> | 6  | 6  | 1.733  | 44 |
| <b>55</b> | 6  | 6  | 4.627  | 44 |
| <b>56</b> | 6  | 6  | 10.27  | 44 |
| <b>57</b> | 6  | 5  | 1.57   | 44 |
| <b>58</b> | 6  | 6  | 10.73  | 44 |
| <b>59</b> | 6  | 6  | 2.225  | 44 |
| <b>60</b> | 6  | 6  | 18.66  | 44 |
| <b>61</b> | 6  | 6  | 9.991  | 44 |
| <b>62</b> | 6  | 6  | 3.632  | 44 |
| <b>63</b> | 6  | 6  | 18.53  | 44 |
| <b>64</b> | 5  | 6  | 8.659  | 44 |
| <b>65</b> | 5  | 6  | 0.5519 | 44 |
| <b>66</b> | 5  | 6  | 16.22  | 44 |
| <b>67</b> | 5  | 6  | 7.956  | 44 |
| <b>68</b> | 5  | 6  | 1.893  | 44 |
| <b>69</b> | 5  | 6  | 16.1   | 44 |
| <b>70</b> | 6  | 6  | 8.503  | 44 |
| <b>71</b> | 6  | 6  | 7.931  | 44 |
| <b>72</b> | 6  | 6  | 0.7376 | 44 |
| <b>73</b> | 6  | 6  | 7.097  | 44 |
| <b>74</b> | 6  | 6  | 7.8    | 44 |
| <b>75</b> | 6  | 6  | 16.43  | 44 |
| <b>76</b> | 6  | 6  | 7.765  | 44 |
| <b>77</b> | 6  | 6  | 1.406  | 44 |
| <b>78</b> | 6  | 6  | 16.3   | 44 |
| <b>79</b> | 6  | 6  | 8.668  | 44 |
| <b>80</b> | 6  | 6  | 15.03  | 44 |
| <b>81</b> | 6  | 6  | 0.1303 | 44 |
| <b>82</b> | 6  | 6  | 6.359  | 44 |
| <b>83</b> | 6  | 6  | 8.538  | 44 |
| <b>84</b> | 6  | 6  | 14.9   | 44 |

| 2way ANOVA<br>Tabular results |                          |                       |         |                 |                   |          |
|-------------------------------|--------------------------|-----------------------|---------|-----------------|-------------------|----------|
| 1                             | Table Analyzed           | Cand.genes 2013 CAPN2 |         |                 |                   |          |
| 2                             |                          |                       |         |                 |                   |          |
| 3                             | Two-way ANOVA            | Ordinary              |         |                 |                   |          |
| 4                             | Alpha                    | 0.05                  |         |                 |                   |          |
| 5                             |                          |                       |         |                 |                   |          |
| 6                             | Source of Variation      | % of total variation  | P value | P value summary | Significant?      |          |
| 7                             | Interaction              | 23.37                 | <0.0001 | ****            | Yes               |          |
| 8                             | Time                     | 13.91                 | <0.0001 | ****            | Yes               |          |
| 9                             | Treatment                | 42.87                 | <0.0001 | ****            | Yes               |          |
| 10                            |                          |                       |         |                 |                   |          |
| 11                            | ANOVA table              | SS (Type III)         | DF      | MS              | F (DFn, DFd)      | P value  |
| 12                            | Interaction              | 382.7                 | 4       | 95.67           | F (4, 44) = 16    | P<0.0001 |
| 13                            | Time                     | 227.8                 | 2       | 113.9           | F (2, 44) = 19.05 | P<0.0001 |
| 14                            | Treatment                | 701.9                 | 2       | 351             | F (2, 44) = 58.69 | P<0.0001 |
| 15                            | Residual                 | 263.1                 | 44      | 5.979           |                   |          |
| 16                            |                          |                       |         |                 |                   |          |
| 17                            | Number of missing values | 1                     |         |                 |                   |          |

| 2way ANOVA<br>Multiple comparisons |                                                   |            |                    |              |         |                  |  |  |
|------------------------------------|---------------------------------------------------|------------|--------------------|--------------|---------|------------------|--|--|
| 1                                  | Compare cell means regardless of rows and columns |            |                    |              |         |                  |  |  |
| 2                                  |                                                   |            |                    |              |         |                  |  |  |
| 3                                  | Number of families                                | 1          |                    |              |         |                  |  |  |
| 4                                  | Number of comparisons per family                  | 36         |                    |              |         |                  |  |  |
| 5                                  | Alpha                                             | 0.05       |                    |              |         |                  |  |  |
| 6                                  |                                                   |            |                    |              |         |                  |  |  |
| 7                                  | Tukey's multiple comparisons test                 | Mean Diff. | 95.00% CI of diff. | Significant? | Summary | Adjusted P Value |  |  |
| 8                                  |                                                   |            |                    |              |         |                  |  |  |
| 9                                  | 68:LL vs. 68:SP                                   | 0.2601     | -4.343 to 4.864    | No           | ns      | >0.9999          |  |  |
| 10                                 | 68:LL vs. 68:SPLL                                 | 0.1916     | -4.637 to 5.02     | No           | ns      | >0.9999          |  |  |
| 11                                 | 68:LL vs. 89:LL                                   | -2.026     | -6.63 to 2.577     | No           | ns      | 0.8778           |  |  |
| 12                                 | 68:LL vs. 89:SP                                   | 0.1689     | -4.435 to 4.772    | No           | ns      | >0.9999          |  |  |
| 13                                 | 68:LL vs. 89:SPLL                                 | -10.5      | -15.1 to -5.896    | Yes          | ****    | <0.0001          |  |  |
| 14                                 | 68:LL vs. 110:LL                                  | 0.05966    | -4.544 to 4.663    | No           | ns      | >0.9999          |  |  |
| 15                                 | 68:LL vs. 110:SP                                  | 0.226      | -4.377 to 4.829    | No           | ns      | >0.9999          |  |  |
| 16                                 | 68:LL vs. 110:SPLL                                | -13.68     | -18.28 to -9.078   | Yes          | ****    | <0.0001          |  |  |
| 17                                 | 68:SP vs. 68:SPLL                                 | -0.06845   | -4.897 to 4.76     | No           | ns      | >0.9999          |  |  |
| 18                                 | 68:SP vs. 89:LL                                   | -2.286     | -6.89 to 2.317     | No           | ns      | 0.7891           |  |  |
| 19                                 | 68:SP vs. 89:SP                                   | -0.0912    | -4.695 to 4.512    | No           | ns      | >0.9999          |  |  |
| 20                                 | 68:SP vs. 89:SPLL                                 | -10.76     | -15.36 to -6.156   | Yes          | ****    | <0.0001          |  |  |
| 21                                 | 68:SP vs. 110:LL                                  | -0.2004    | -4.804 to 4.403    | No           | ns      | >0.9999          |  |  |
| 22                                 | 68:SP vs. 110:SP                                  | -0.03406   | -4.638 to 4.569    | No           | ns      | >0.9999          |  |  |
| 23                                 | 68:SP vs. 110:SPLL                                | -13.94     | -18.54 to -9.338   | Yes          | ****    | <0.0001          |  |  |
| 24                                 | 68:SPLL vs. 89:LL                                 | -2.218     | -7.046 to 2.61     | No           | ns      | 0.8505           |  |  |
| 25                                 | 68:SPLL vs. 89:SP                                 | -0.02275   | -4.851 to 4.805    | No           | ns      | >0.9999          |  |  |
| 26                                 | 68:SPLL vs. 89:SPLL                               | -10.69     | -15.52 to -5.863   | Yes          | ****    | <0.0001          |  |  |
| 27                                 | 68:SPLL vs. 110:LL                                | -0.1319    | -4.96 to 4.696     | No           | ns      | >0.9999          |  |  |
| 28                                 | 68:SPLL vs. 110:SP                                | 0.03439    | -4.794 to 4.863    | No           | ns      | >0.9999          |  |  |
| 29                                 | 68:SPLL vs. 110:SPLL                              | -13.87     | -18.7 to -9.045    | Yes          | ****    | <0.0001          |  |  |
| 30                                 | 89:LL vs. 89:SP                                   | 2.195      | -2.408 to 6.799    | No           | ns      | 0.8230           |  |  |

| 2way ANOVA<br>Multiple comparisons |                      |         |                  |            |             |         |    |         |    |
|------------------------------------|----------------------|---------|------------------|------------|-------------|---------|----|---------|----|
| 31                                 | 89:LL vs. 89:SPLL    | -8.473  | -13.08 to -3.87  | Yes        | ****        | <0.0001 |    |         |    |
| 32                                 | 89:LL vs. 110:LL     | 2.086   | -2.518 to 6.689  | No         | ns          | 0.8597  |    |         |    |
| 33                                 | 89:LL vs. 110:SP     | 2.252   | -2.351 to 6.856  | No         | ns          | 0.8021  |    |         |    |
| 34                                 | 89:LL vs. 110:SPLL   | -11.66  | -16.26 to -7.052 | Yes        | ****        | <0.0001 |    |         |    |
| 35                                 | 89:SP vs. 89:SPLL    | -10.67  | -15.27 to -6.065 | Yes        | ****        | <0.0001 |    |         |    |
| 36                                 | 89:SP vs. 110:LL     | -0.1092 | -4.713 to 4.494  | No         | ns          | >0.9999 |    |         |    |
| 37                                 | 89:SP vs. 110:SP     | 0.05714 | -4.546 to 4.661  | No         | ns          | >0.9999 |    |         |    |
| 38                                 | 89:SP vs. 110:SPLL   | -13.85  | -18.45 to -9.247 | Yes        | ****        | <0.0001 |    |         |    |
| 39                                 | 89:SPLL vs. 110:LL   | 10.56   | 5.956 to 15.16   | Yes        | ****        | <0.0001 |    |         |    |
| 40                                 | 89:SPLL vs. 110:SP   | 10.73   | 6.122 to 15.33   | Yes        | ****        | <0.0001 |    |         |    |
| 41                                 | 89:SPLL vs. 110:SPLL | -3.182  | -7.785 to 1.421  | No         | ns          | 0.3910  |    |         |    |
| 42                                 | 110:LL vs. 110:SP    | 0.1663  | -4.437 to 4.77   | No         | ns          | >0.9999 |    |         |    |
| 43                                 | 110:LL vs. 110:SPLL  | -13.74  | -18.34 to -9.138 | Yes        | ****        | <0.0001 |    |         |    |
| 44                                 | 110:SP vs. 110:SPLL  | -13.91  | -18.51 to -9.304 | Yes        | ****        | <0.0001 |    |         |    |
| 45                                 |                      |         |                  |            |             |         |    |         |    |
| 46                                 |                      |         |                  |            |             |         |    |         |    |
| 47                                 | Test details         | Mean 1  | Mean 2           | Mean Diff. | SE of diff. | N1      | N2 | q       | DF |
| 48                                 |                      |         |                  |            |             |         |    |         |    |
| 49                                 | 68:LL vs. 68:SP      | 0.3038  | 0.04374          | 0.2601     | 1.412       | 6       | 6  | 0.2605  | 44 |
| 50                                 | 68:LL vs. 68:SPLL    | 0.3038  | 0.1122           | 0.1916     | 1.481       | 6       | 5  | 0.183   | 44 |
| 51                                 | 68:LL vs. 89:LL      | 0.3038  | 2.33             | -2.026     | 1.412       | 6       | 6  | 2.03    | 44 |
| 52                                 | 68:LL vs. 89:SP      | 0.3038  | 0.1349           | 0.1689     | 1.412       | 6       | 6  | 0.1691  | 44 |
| 53                                 | 68:LL vs. 89:SPLL    | 0.3038  | 10.8             | -10.5      | 1.412       | 6       | 6  | 10.52   | 44 |
| 54                                 | 68:LL vs. 110:LL     | 0.3038  | 0.2441           | 0.05966    | 1.412       | 6       | 6  | 0.05976 | 44 |
| 55                                 | 68:LL vs. 110:SP     | 0.3038  | 0.0778           | 0.226      | 1.412       | 6       | 6  | 0.2264  | 44 |
| 56                                 | 68:LL vs. 110:SPLL   | 0.3038  | 13.99            | -13.68     | 1.412       | 6       | 6  | 13.71   | 44 |
| 57                                 | 68:SP vs. 68:SPLL    | 0.04374 | 0.1122           | -0.06845   | 1.481       | 6       | 5  | 0.06538 | 44 |
| 58                                 | 68:SP vs. 89:LL      | 0.04374 | 2.33             | -2.286     | 1.412       | 6       | 6  | 2.29    | 44 |
| 59                                 | 68:SP vs. 89:SP      | 0.04374 | 0.1349           | -0.0912    | 1.412       | 6       | 6  | 0.09135 | 44 |
| 60                                 | 68:SP vs. 89:SPLL    | 0.04374 | 10.8             | -10.76     | 1.412       | 6       | 6  | 10.78   | 44 |

| 2way ANOVA<br>Multiple comparisons |                      |         |        |          |       |   |   |         |    |
|------------------------------------|----------------------|---------|--------|----------|-------|---|---|---------|----|
| 61                                 | 68:SP vs. 110:LL     | 0.04374 | 0.2441 | -0.2004  | 1.412 | 6 | 6 | 0.2007  | 44 |
| 62                                 | 68:SP vs. 110:SP     | 0.04374 | 0.0778 | -0.03406 | 1.412 | 6 | 6 | 0.03412 | 44 |
| 63                                 | 68:SP vs. 110:SPLL   | 0.04374 | 13.99  | -13.94   | 1.412 | 6 | 6 | 13.97   | 44 |
| 64                                 | 68:SPLL vs. 89:LL    | 0.1122  | 2.33   | -2.218   | 1.481 | 5 | 6 | 2.118   | 44 |
| 65                                 | 68:SPLL vs. 89:SP    | 0.1122  | 0.1349 | -0.02275 | 1.481 | 5 | 6 | 0.02173 | 44 |
| 66                                 | 68:SPLL vs. 89:SPLL  | 0.1122  | 10.8   | -10.69   | 1.481 | 5 | 6 | 10.21   | 44 |
| 67                                 | 68:SPLL vs. 110:LL   | 0.1122  | 0.2441 | -0.1319  | 1.481 | 5 | 6 | 0.126   | 44 |
| 68                                 | 68:SPLL vs. 110:SP   | 0.1122  | 0.0778 | 0.03439  | 1.481 | 5 | 6 | 0.03285 | 44 |
| 69                                 | 68:SPLL vs. 110:SPLL | 0.1122  | 13.99  | -13.87   | 1.481 | 5 | 6 | 13.25   | 44 |
| 70                                 | 89:LL vs. 89:SP      | 2.33    | 0.1349 | 2.195    | 1.412 | 6 | 6 | 2.199   | 44 |
| 71                                 | 89:LL vs. 89:SPLL    | 2.33    | 10.8   | -8.473   | 1.412 | 6 | 6 | 8.488   | 44 |
| 72                                 | 89:LL vs. 110:LL     | 2.33    | 0.2441 | 2.086    | 1.412 | 6 | 6 | 2.09    | 44 |
| 73                                 | 89:LL vs. 110:SP     | 2.33    | 0.0778 | 2.252    | 1.412 | 6 | 6 | 2.256   | 44 |
| 74                                 | 89:LL vs. 110:SPLL   | 2.33    | 13.99  | -11.66   | 1.412 | 6 | 6 | 11.68   | 44 |
| 75                                 | 89:SP vs. 89:SPLL    | 0.1349  | 10.8   | -10.67   | 1.412 | 6 | 6 | 10.69   | 44 |
| 76                                 | 89:SP vs. 110:LL     | 0.1349  | 0.2441 | -0.1092  | 1.412 | 6 | 6 | 0.1094  | 44 |
| 77                                 | 89:SP vs. 110:SP     | 0.1349  | 0.0778 | 0.05714  | 1.412 | 6 | 6 | 0.05724 | 44 |
| 78                                 | 89:SP vs. 110:SPLL   | 0.1349  | 13.99  | -13.85   | 1.412 | 6 | 6 | 13.87   | 44 |
| 79                                 | 89:SPLL vs. 110:LL   | 10.8    | 0.2441 | 10.56    | 1.412 | 6 | 6 | 10.58   | 44 |
| 80                                 | 89:SPLL vs. 110:SP   | 10.8    | 0.0778 | 10.73    | 1.412 | 6 | 6 | 10.74   | 44 |
| 81                                 | 89:SPLL vs. 110:SPLL | 10.8    | 13.99  | -3.182   | 1.412 | 6 | 6 | 3.187   | 44 |
| 82                                 | 110:LL vs. 110:SP    | 0.2441  | 0.0778 | 0.1663   | 1.412 | 6 | 6 | 0.1666  | 44 |
| 83                                 | 110:LL vs. 110:SPLL  | 0.2441  | 13.99  | -13.74   | 1.412 | 6 | 6 | 13.76   | 44 |
| 84                                 | 110:SP vs. 110:SPLL  | 0.0778  | 13.99  | -13.91   | 1.412 | 6 | 6 | 13.93   | 44 |

| 2way ANOVA<br>Tabular results |                          |                       |         |                 |                   |          |
|-------------------------------|--------------------------|-----------------------|---------|-----------------|-------------------|----------|
| 1                             | Table Analyzed           | Cand.genes 2013 FKBP5 |         |                 |                   |          |
| 2                             |                          |                       |         |                 |                   |          |
| 3                             | Two-way ANOVA            | Ordinary              |         |                 |                   |          |
| 4                             | Alpha                    | 0.05                  |         |                 |                   |          |
| 5                             |                          |                       |         |                 |                   |          |
| 6                             | Source of Variation      | % of total variation  | P value | P value summary | Significant?      |          |
| 7                             | Interaction              | 10.9                  | 0.0003  | ***             | Yes               |          |
| 8                             | Time                     | 14.02                 | <0.0001 | ****            | Yes               |          |
| 9                             | Treatment                | 53.42                 | <0.0001 | ****            | Yes               |          |
| 10                            |                          |                       |         |                 |                   |          |
| 11                            | ANOVA table              | SS (Type III)         | DF      | MS              | F (DFn, DFd)      | P value  |
| 12                            | Interaction              | 16881                 | 4       | 4220            | F (4, 44) = 6.653 | P=0.0003 |
| 13                            | Time                     | 21723                 | 2       | 10862           | F (2, 44) = 17.12 | P<0.0001 |
| 14                            | Treatment                | 82735                 | 2       | 41368           | F (2, 44) = 65.21 | P<0.0001 |
| 15                            | Residual                 | 27913                 | 44      | 634.4           |                   |          |
| 16                            |                          |                       |         |                 |                   |          |
| 17                            | Number of missing values | 1                     |         |                 |                   |          |

| 2way ANOVA<br>Multiple comparisons |                                                   |            |                    |              |         |                  |  |  |  |
|------------------------------------|---------------------------------------------------|------------|--------------------|--------------|---------|------------------|--|--|--|
| 1                                  | Compare cell means regardless of rows and columns |            |                    |              |         |                  |  |  |  |
| 2                                  |                                                   |            |                    |              |         |                  |  |  |  |
| 3                                  | Number of families                                | 1          |                    |              |         |                  |  |  |  |
| 4                                  | Number of comparisons per family                  | 36         |                    |              |         |                  |  |  |  |
| 5                                  | Alpha                                             | 0.05       |                    |              |         |                  |  |  |  |
| 6                                  |                                                   |            |                    |              |         |                  |  |  |  |
| 7                                  | Tukey's multiple comparisons test                 | Mean Diff. | 95.00% CI of diff. | Significant? | Summary | Adjusted P Value |  |  |  |
| 8                                  |                                                   |            |                    |              |         |                  |  |  |  |
| 9                                  | 68:LL vs. 68:SP                                   | -0.3438    | -47.76 to 47.07    | No           | ns      | >0.9999          |  |  |  |
| 10                                 | 68:LL vs. 68:SPLL                                 | -31.85     | -81.58 to 17.88    | No           | ns      | 0.4938           |  |  |  |
| 11                                 | 68:LL vs. 89:LL                                   | -27.57     | -74.99 to 19.84    | No           | ns      | 0.6198           |  |  |  |
| 12                                 | 68:LL vs. 89:SP                                   | 7.866      | -39.55 to 55.28    | No           | ns      | 0.9998           |  |  |  |
| 13                                 | 68:LL vs. 89:SPLL                                 | -124.6     | -172 to -77.15     | Yes          | ****    | <0.0001          |  |  |  |
| 14                                 | 68:LL vs. 110:LL                                  | -39.18     | -86.6 to 8.237     | No           | ns      | 0.1796           |  |  |  |
| 15                                 | 68:LL vs. 110:SP                                  | -9.818     | -57.23 to 37.6     | No           | ns      | 0.9989           |  |  |  |
| 16                                 | 68:LL vs. 110:SPLL                                | -126.2     | -173.6 to -78.79   | Yes          | ****    | <0.0001          |  |  |  |
| 17                                 | 68:SP vs. 68:SPLL                                 | -31.51     | -81.24 to 18.22    | No           | ns      | 0.5084           |  |  |  |
| 18                                 | 68:SP vs. 89:LL                                   | -27.23     | -74.65 to 20.19    | No           | ns      | 0.6352           |  |  |  |
| 19                                 | 68:SP vs. 89:SP                                   | 8.209      | -39.21 to 55.63    | No           | ns      | 0.9997           |  |  |  |
| 20                                 | 68:SP vs. 89:SPLL                                 | -124.2     | -171.6 to -76.81   | Yes          | ****    | <0.0001          |  |  |  |
| 21                                 | 68:SP vs. 110:LL                                  | -38.84     | -86.25 to 8.581    | No           | ns      | 0.1882           |  |  |  |
| 22                                 | 68:SP vs. 110:SP                                  | -9.474     | -56.89 to 37.94    | No           | ns      | 0.9991           |  |  |  |
| 23                                 | 68:SP vs. 110:SPLL                                | -125.9     | -173.3 to -78.44   | Yes          | ****    | <0.0001          |  |  |  |
| 24                                 | 68:SPLL vs. 89:LL                                 | 4.279      | -45.45 to 54.01    | No           | ns      | >0.9999          |  |  |  |
| 25                                 | 68:SPLL vs. 89:SP                                 | 39.72      | -10.01 to 89.45    | No           | ns      | 0.2142           |  |  |  |
| 26                                 | 68:SPLL vs. 89:SPLL                               | -92.72     | -142.4 to -42.99   | Yes          | ****    | <0.0001          |  |  |  |
| 27                                 | 68:SPLL vs. 110:LL                                | -7.327     | -57.06 to 42.4     | No           | ns      | >0.9999          |  |  |  |
| 28                                 | 68:SPLL vs. 110:SP                                | 22.04      | -27.7 to 71.77     | No           | ns      | 0.8739           |  |  |  |
| 29                                 | 68:SPLL vs. 110:SPLL                              | -94.35     | -144.1 to -44.62   | Yes          | ****    | <0.0001          |  |  |  |
| 30                                 | 89:LL vs. 89:SP                                   | 35.44      | -11.98 to 82.86    | No           | ns      | 0.2904           |  |  |  |



| 2way ANOVA<br>Multiple comparisons |                      |        |                  |            |             |         |    |         |    |
|------------------------------------|----------------------|--------|------------------|------------|-------------|---------|----|---------|----|
| 31                                 | 89:LL vs. 89:SPLL    | -96.99 | -144.4 to -49.58 | Yes        | ****        | <0.0001 |    |         |    |
| 32                                 | 89:LL vs. 110:LL     | -11.61 | -59.02 to 35.81  | No         | ns          | 0.9964  |    |         |    |
| 33                                 | 89:LL vs. 110:SP     | 17.76  | -29.66 to 65.17  | No         | ns          | 0.9474  |    |         |    |
| 34                                 | 89:LL vs. 110:SPLL   | -98.63 | -146 to -51.21   | Yes        | ****        | <0.0001 |    |         |    |
| 35                                 | 89:SP vs. 89:SPLL    | -132.4 | -179.9 to -85.02 | Yes        | ****        | <0.0001 |    |         |    |
| 36                                 | 89:SP vs. 110:LL     | -47.05 | -94.46 to 0.3711 | No         | ns          | 0.0533  |    |         |    |
| 37                                 | 89:SP vs. 110:SP     | -17.68 | -65.1 to 29.73   | No         | ns          | 0.9486  |    |         |    |
| 38                                 | 89:SP vs. 110:SPLL   | -134.1 | -181.5 to -86.65 | Yes        | ****        | <0.0001 |    |         |    |
| 39                                 | 89:SPLL vs. 110:LL   | 85.39  | 37.97 to 132.8   | Yes        | ****        | <0.0001 |    |         |    |
| 40                                 | 89:SPLL vs. 110:SP   | 114.8  | 67.33 to 162.2   | Yes        | ****        | <0.0001 |    |         |    |
| 41                                 | 89:SPLL vs. 110:SPLL | -1.636 | -49.05 to 45.78  | No         | ns          | >0.9999 |    |         |    |
| 42                                 | 110:LL vs. 110:SP    | 29.36  | -18.05 to 76.78  | No         | ns          | 0.5389  |    |         |    |
| 43                                 | 110:LL vs. 110:SPLL  | -87.03 | -134.4 to -39.61 | Yes        | ****        | <0.0001 |    |         |    |
| 44                                 | 110:SP vs. 110:SPLL  | -116.4 | -163.8 to -68.97 | Yes        | ****        | <0.0001 |    |         |    |
| 45                                 |                      |        |                  |            |             |         |    |         |    |
| 46                                 |                      |        |                  |            |             |         |    |         |    |
| 47                                 | Test details         | Mean 1 | Mean 2           | Mean Diff. | SE of diff. | N1      | N2 | q       | DF |
| 48                                 |                      |        |                  |            |             |         |    |         |    |
| 49                                 | 68:LL vs. 68:SP      | 25.62  | 25.96            | -0.3438    | 14.54       | 6       | 6  | 0.03344 | 44 |
| 50                                 | 68:LL vs. 68:SPLL    | 25.62  | 57.47            | -31.85     | 15.25       | 6       | 5  | 2.954   | 44 |
| 51                                 | 68:LL vs. 89:LL      | 25.62  | 53.19            | -27.57     | 14.54       | 6       | 6  | 2.682   | 44 |
| 52                                 | 68:LL vs. 89:SP      | 25.62  | 17.75            | 7.866      | 14.54       | 6       | 6  | 0.7649  | 44 |
| 53                                 | 68:LL vs. 89:SPLL    | 25.62  | 150.2            | -124.6     | 14.54       | 6       | 6  | 12.11   | 44 |
| 54                                 | 68:LL vs. 110:LL     | 25.62  | 64.8             | -39.18     | 14.54       | 6       | 6  | 3.81    | 44 |
| 55                                 | 68:LL vs. 110:SP     | 25.62  | 35.44            | -9.818     | 14.54       | 6       | 6  | 0.9548  | 44 |
| 56                                 | 68:LL vs. 110:SPLL   | 25.62  | 151.8            | -126.2     | 14.54       | 6       | 6  | 12.27   | 44 |
| 57                                 | 68:SP vs. 68:SPLL    | 25.96  | 57.47            | -31.51     | 15.25       | 6       | 5  | 2.922   | 44 |
| 58                                 | 68:SP vs. 89:LL      | 25.96  | 53.19            | -27.23     | 14.54       | 6       | 6  | 2.648   | 44 |
| 59                                 | 68:SP vs. 89:SP      | 25.96  | 17.75            | 8.209      | 14.54       | 6       | 6  | 0.7984  | 44 |
| 60                                 | 68:SP vs. 89:SPLL    | 25.96  | 150.2            | -124.2     | 14.54       | 6       | 6  | 12.08   | 44 |

| 2way ANOVA<br>Multiple comparisons |                      |       |       |        |       |   |   |        |    |
|------------------------------------|----------------------|-------|-------|--------|-------|---|---|--------|----|
| 61                                 | 68:SP vs. 110:LL     | 25.96 | 64.8  | -38.84 | 14.54 | 6 | 6 | 3.777  | 44 |
| 62                                 | 68:SP vs. 110:SP     | 25.96 | 35.44 | -9.474 | 14.54 | 6 | 6 | 0.9214 | 44 |
| 63                                 | 68:SP vs. 110:SPLL   | 25.96 | 151.8 | -125.9 | 14.54 | 6 | 6 | 12.24  | 44 |
| 64                                 | 68:SPLL vs. 89:LL    | 57.47 | 53.19 | 4.279  | 15.25 | 5 | 6 | 0.3967 | 44 |
| 65                                 | 68:SPLL vs. 89:SP    | 57.47 | 17.75 | 39.72  | 15.25 | 5 | 6 | 3.683  | 44 |
| 66                                 | 68:SPLL vs. 89:SPLL  | 57.47 | 150.2 | -92.72 | 15.25 | 5 | 6 | 8.597  | 44 |
| 67                                 | 68:SPLL vs. 110:LL   | 57.47 | 64.8  | -7.327 | 15.25 | 5 | 6 | 0.6794 | 44 |
| 68                                 | 68:SPLL vs. 110:SP   | 57.47 | 35.44 | 22.04  | 15.25 | 5 | 6 | 2.043  | 44 |
| 69                                 | 68:SPLL vs. 110:SPLL | 57.47 | 151.8 | -94.35 | 15.25 | 5 | 6 | 8.749  | 44 |
| 70                                 | 89:LL vs. 89:SP      | 53.19 | 17.75 | 35.44  | 14.54 | 6 | 6 | 3.447  | 44 |
| 71                                 | 89:LL vs. 89:SPLL    | 53.19 | 150.2 | -96.99 | 14.54 | 6 | 6 | 9.433  | 44 |
| 72                                 | 89:LL vs. 110:LL     | 53.19 | 64.8  | -11.61 | 14.54 | 6 | 6 | 1.129  | 44 |
| 73                                 | 89:LL vs. 110:SP     | 53.19 | 35.44 | 17.76  | 14.54 | 6 | 6 | 1.727  | 44 |
| 74                                 | 89:LL vs. 110:SPLL   | 53.19 | 151.8 | -98.63 | 14.54 | 6 | 6 | 9.592  | 44 |
| 75                                 | 89:SP vs. 89:SPLL    | 17.75 | 150.2 | -132.4 | 14.54 | 6 | 6 | 12.88  | 44 |
| 76                                 | 89:SP vs. 110:LL     | 17.75 | 64.8  | -47.05 | 14.54 | 6 | 6 | 4.575  | 44 |
| 77                                 | 89:SP vs. 110:SP     | 17.75 | 35.44 | -17.68 | 14.54 | 6 | 6 | 1.72   | 44 |
| 78                                 | 89:SP vs. 110:SPLL   | 17.75 | 151.8 | -134.1 | 14.54 | 6 | 6 | 13.04  | 44 |
| 79                                 | 89:SPLL vs. 110:LL   | 150.2 | 64.8  | 85.39  | 14.54 | 6 | 6 | 8.304  | 44 |
| 80                                 | 89:SPLL vs. 110:SP   | 150.2 | 35.44 | 114.8  | 14.54 | 6 | 6 | 11.16  | 44 |
| 81                                 | 89:SPLL vs. 110:SPLL | 150.2 | 151.8 | -1.636 | 14.54 | 6 | 6 | 0.1591 | 44 |
| 82                                 | 110:LL vs. 110:SP    | 64.8  | 35.44 | 29.36  | 14.54 | 6 | 6 | 2.856  | 44 |
| 83                                 | 110:LL vs. 110:SPLL  | 64.8  | 151.8 | -87.03 | 14.54 | 6 | 6 | 8.463  | 44 |
| 84                                 | 110:SP vs. 110:SPLL  | 35.44 | 151.8 | -116.4 | 14.54 | 6 | 6 | 11.32  | 44 |

| 2way ANOVA<br>Tabular results |                          |                      |         |                 |                   |          |
|-------------------------------|--------------------------|----------------------|---------|-----------------|-------------------|----------|
| 1                             | Table Analyzed           | Cand.genes 2013 TPH1 |         |                 |                   |          |
| 2                             |                          |                      |         |                 |                   |          |
| 3                             | Two-way ANOVA            | Ordinary             |         |                 |                   |          |
| 4                             | Alpha                    | 0.05                 |         |                 |                   |          |
| 5                             |                          |                      |         |                 |                   |          |
| 6                             | Source of Variation      | % of total variation | P value | P value summary | Significant?      |          |
| 7                             | Interaction              | 31.94                | <0.0001 | ****            | Yes               |          |
| 8                             | Time                     | 14.85                | <0.0001 | ****            | Yes               |          |
| 9                             | Treatment                | 30                   | <0.0001 | ****            | Yes               |          |
| 10                            |                          |                      |         |                 |                   |          |
| 11                            | ANOVA table              | SS (Type III)        | DF      | MS              | F (DFn, DFd)      | P value  |
| 12                            | Interaction              | 352.6                | 4       | 88.14           | F (4, 44) = 17.07 | P<0.0001 |
| 13                            | Time                     | 163.9                | 2       | 81.97           | F (2, 44) = 15.88 | P<0.0001 |
| 14                            | Treatment                | 331.1                | 2       | 165.6           | F (2, 44) = 32.07 | P<0.0001 |
| 15                            | Residual                 | 227.1                | 44      | 5.162           |                   |          |
| 16                            |                          |                      |         |                 |                   |          |
| 17                            | Number of missing values | 1                    |         |                 |                   |          |

| 2way ANOVA<br>Multiple comparisons |                                                   |            |                    |              |         |                  |  |  |  |
|------------------------------------|---------------------------------------------------|------------|--------------------|--------------|---------|------------------|--|--|--|
| 1                                  | Compare cell means regardless of rows and columns |            |                    |              |         |                  |  |  |  |
| 2                                  |                                                   |            |                    |              |         |                  |  |  |  |
| 3                                  | Number of families                                | 1          |                    |              |         |                  |  |  |  |
| 4                                  | Number of comparisons per family                  | 36         |                    |              |         |                  |  |  |  |
| 5                                  | Alpha                                             | 0.05       |                    |              |         |                  |  |  |  |
| 6                                  |                                                   |            |                    |              |         |                  |  |  |  |
| 7                                  | Tukey's multiple comparisons test                 | Mean Diff. | 95.00% CI of diff. | Significant? | Summary | Adjusted P Value |  |  |  |
| 8                                  |                                                   |            |                    |              |         |                  |  |  |  |
| 9                                  | 68:LL vs. 68:SP                                   | -0.341     | -4.618 to 3.936    | No           | ns      | >0.9999          |  |  |  |
| 10                                 | 68:LL vs. 68:SPLL                                 | -0.2108    | -4.697 to 4.275    | No           | ns      | >0.9999          |  |  |  |
| 11                                 | 68:LL vs. 89:LL                                   | -0.6203    | -4.898 to 3.657    | No           | ns      | >0.9999          |  |  |  |
| 12                                 | 68:LL vs. 89:SP                                   | -0.3285    | -4.606 to 3.949    | No           | ns      | >0.9999          |  |  |  |
| 13                                 | 68:LL vs. 89:SPLL                                 | -3.563     | -7.84 to 0.7143    | No           | ns      | 0.1718           |  |  |  |
| 14                                 | 68:LL vs. 110:LL                                  | 0.141      | -4.136 to 4.418    | No           | ns      | >0.9999          |  |  |  |
| 15                                 | 68:LL vs. 110:SP                                  | -0.304     | -4.581 to 3.973    | No           | ns      | >0.9999          |  |  |  |
| 16                                 | 68:LL vs. 110:SPLL                                | -13.05     | -17.33 to -8.775   | Yes          | ****    | <0.0001          |  |  |  |
| 17                                 | 68:SP vs. 68:SPLL                                 | 0.1302     | -4.356 to 4.616    | No           | ns      | >0.9999          |  |  |  |
| 18                                 | 68:SP vs. 89:LL                                   | -0.2793    | -4.557 to 3.998    | No           | ns      | >0.9999          |  |  |  |
| 19                                 | 68:SP vs. 89:SP                                   | 0.01248    | -4.265 to 4.29     | No           | ns      | >0.9999          |  |  |  |
| 20                                 | 68:SP vs. 89:SPLL                                 | -3.222     | -7.499 to 1.055    | No           | ns      | 0.2809           |  |  |  |
| 21                                 | 68:SP vs. 110:LL                                  | 0.482      | -3.795 to 4.759    | No           | ns      | >0.9999          |  |  |  |
| 22                                 | 68:SP vs. 110:SP                                  | 0.037      | -4.24 to 4.314     | No           | ns      | >0.9999          |  |  |  |
| 23                                 | 68:SP vs. 110:SPLL                                | -12.71     | -16.99 to -8.434   | Yes          | ****    | <0.0001          |  |  |  |
| 24                                 | 68:SPLL vs. 89:LL                                 | -0.4095    | -4.896 to 4.077    | No           | ns      | >0.9999          |  |  |  |
| 25                                 | 68:SPLL vs. 89:SP                                 | -0.1177    | -4.604 to 4.368    | No           | ns      | >0.9999          |  |  |  |
| 26                                 | 68:SPLL vs. 89:SPLL                               | -3.352     | -7.838 to 1.134    | No           | ns      | 0.2907           |  |  |  |
| 27                                 | 68:SPLL vs. 110:LL                                | 0.3518     | -4.134 to 4.838    | No           | ns      | >0.9999          |  |  |  |
| 28                                 | 68:SPLL vs. 110:SP                                | -0.09318   | -4.579 to 4.393    | No           | ns      | >0.9999          |  |  |  |
| 29                                 | 68:SPLL vs. 110:SPLL                              | -12.84     | -17.33 to -8.355   | Yes          | ****    | <0.0001          |  |  |  |
| 30                                 | 89:LL vs. 89:SP                                   | 0.2918     | -3.986 to 4.569    | No           | ns      | >0.9999          |  |  |  |

| 2way ANOVA<br>Multiple comparisons |                      |         |                  |            |             |         |    |         |    |
|------------------------------------|----------------------|---------|------------------|------------|-------------|---------|----|---------|----|
| 31                                 | 89:LL vs. 89:SPLL    | -2.943  | -7.22 to 1.335   | No         | ns          | 0.3973  |    |         |    |
| 32                                 | 89:LL vs. 110:LL     | 0.7613  | -3.516 to 5.039  | No         | ns          | 0.9996  |    |         |    |
| 33                                 | 89:LL vs. 110:SP     | 0.3163  | -3.961 to 4.594  | No         | ns          | >0.9999 |    |         |    |
| 34                                 | 89:LL vs. 110:SPLL   | -12.43  | -16.71 to -8.154 | Yes        | ****        | <0.0001 |    |         |    |
| 35                                 | 89:SP vs. 89:SPLL    | -3.235  | -7.512 to 1.043  | No         | ns          | 0.2762  |    |         |    |
| 36                                 | 89:SP vs. 110:LL     | 0.4695  | -3.808 to 4.747  | No         | ns          | >0.9999 |    |         |    |
| 37                                 | 89:SP vs. 110:SP     | 0.02452 | -4.253 to 4.302  | No         | ns          | >0.9999 |    |         |    |
| 38                                 | 89:SP vs. 110:SPLL   | -12.72  | -17 to -8.446    | Yes        | ****        | <0.0001 |    |         |    |
| 39                                 | 89:SPLL vs. 110:LL   | 3.704   | -0.5733 to 7.981 | No         | ns          | 0.1375  |    |         |    |
| 40                                 | 89:SPLL vs. 110:SP   | 3.259   | -1.018 to 7.536  | No         | ns          | 0.2672  |    |         |    |
| 41                                 | 89:SPLL vs. 110:SPLL | -9.489  | -13.77 to -5.212 | Yes        | ****        | <0.0001 |    |         |    |
| 42                                 | 110:LL vs. 110:SP    | -0.445  | -4.722 to 3.832  | No         | ns          | >0.9999 |    |         |    |
| 43                                 | 110:LL vs. 110:SPLL  | -13.19  | -17.47 to -8.916 | Yes        | ****        | <0.0001 |    |         |    |
| 44                                 | 110:SP vs. 110:SPLL  | -12.75  | -17.03 to -8.471 | Yes        | ****        | <0.0001 |    |         |    |
| 45                                 |                      |         |                  |            |             |         |    |         |    |
| 46                                 |                      |         |                  |            |             |         |    |         |    |
| 47                                 | Test details         | Mean 1  | Mean 2           | Mean Diff. | SE of diff. | N1      | N2 | q       | DF |
| 48                                 |                      |         |                  |            |             |         |    |         |    |
| 49                                 | 68:LL vs. 68:SP      | 0.7731  | 1.114            | -0.341     | 1.312       | 6       | 6  | 0.3676  | 44 |
| 50                                 | 68:LL vs. 68:SPLL    | 0.7731  | 0.9839           | -0.2108    | 1.376       | 6       | 5  | 0.2167  | 44 |
| 51                                 | 68:LL vs. 89:LL      | 0.7731  | 1.393            | -0.6203    | 1.312       | 6       | 6  | 0.6688  | 44 |
| 52                                 | 68:LL vs. 89:SP      | 0.7731  | 1.102            | -0.3285    | 1.312       | 6       | 6  | 0.3542  | 44 |
| 53                                 | 68:LL vs. 89:SPLL    | 0.7731  | 4.336            | -3.563     | 1.312       | 6       | 6  | 3.841   | 44 |
| 54                                 | 68:LL vs. 110:LL     | 0.7731  | 0.6321           | 0.141      | 1.312       | 6       | 6  | 0.152   | 44 |
| 55                                 | 68:LL vs. 110:SP     | 0.7731  | 1.077            | -0.304     | 1.312       | 6       | 6  | 0.3277  | 44 |
| 56                                 | 68:LL vs. 110:SPLL   | 0.7731  | 13.83            | -13.05     | 1.312       | 6       | 6  | 14.07   | 44 |
| 57                                 | 68:SP vs. 68:SPLL    | 1.114   | 0.9839           | 0.1302     | 1.376       | 6       | 5  | 0.1338  | 44 |
| 58                                 | 68:SP vs. 89:LL      | 1.114   | 1.393            | -0.2793    | 1.312       | 6       | 6  | 0.3011  | 44 |
| 59                                 | 68:SP vs. 89:SP      | 1.114   | 1.102            | 0.01248    | 1.312       | 6       | 6  | 0.01346 | 44 |
| 60                                 | 68:SP vs. 89:SPLL    | 1.114   | 4.336            | -3.222     | 1.312       | 6       | 6  | 3.474   | 44 |

| 2way ANOVA<br>Multiple comparisons |                      |        |        |          |       |   |   |         |    |
|------------------------------------|----------------------|--------|--------|----------|-------|---|---|---------|----|
| 61                                 | 68:SP vs. 110:LL     | 1.114  | 0.6321 | 0.482    | 1.312 | 6 | 6 | 0.5196  | 44 |
| 62                                 | 68:SP vs. 110:SP     | 1.114  | 1.077  | 0.037    | 1.312 | 6 | 6 | 0.03989 | 44 |
| 63                                 | 68:SP vs. 110:SPLL   | 1.114  | 13.83  | -12.71   | 1.312 | 6 | 6 | 13.7    | 44 |
| 64                                 | 68:SPLL vs. 89:LL    | 0.9839 | 1.393  | -0.4095  | 1.376 | 5 | 6 | 0.4209  | 44 |
| 65                                 | 68:SPLL vs. 89:SP    | 0.9839 | 1.102  | -0.1177  | 1.376 | 5 | 6 | 0.121   | 44 |
| 66                                 | 68:SPLL vs. 89:SPLL  | 0.9839 | 4.336  | -3.352   | 1.376 | 5 | 6 | 3.446   | 44 |
| 67                                 | 68:SPLL vs. 110:LL   | 0.9839 | 0.6321 | 0.3518   | 1.376 | 5 | 6 | 0.3616  | 44 |
| 68                                 | 68:SPLL vs. 110:SP   | 0.9839 | 1.077  | -0.09318 | 1.376 | 5 | 6 | 0.09578 | 44 |
| 69                                 | 68:SPLL vs. 110:SPLL | 0.9839 | 13.83  | -12.84   | 1.376 | 5 | 6 | 13.2    | 44 |
| 70                                 | 89:LL vs. 89:SP      | 1.393  | 1.102  | 0.2918   | 1.312 | 6 | 6 | 0.3146  | 44 |
| 71                                 | 89:LL vs. 89:SPLL    | 1.393  | 4.336  | -2.943   | 1.312 | 6 | 6 | 3.173   | 44 |
| 72                                 | 89:LL vs. 110:LL     | 1.393  | 0.6321 | 0.7613   | 1.312 | 6 | 6 | 0.8208  | 44 |
| 73                                 | 89:LL vs. 110:SP     | 1.393  | 1.077  | 0.3163   | 1.312 | 6 | 6 | 0.341   | 44 |
| 74                                 | 89:LL vs. 110:SPLL   | 1.393  | 13.83  | -12.43   | 1.312 | 6 | 6 | 13.4    | 44 |
| 75                                 | 89:SP vs. 89:SPLL    | 1.102  | 4.336  | -3.235   | 1.312 | 6 | 6 | 3.487   | 44 |
| 76                                 | 89:SP vs. 110:LL     | 1.102  | 0.6321 | 0.4695   | 1.312 | 6 | 6 | 0.5062  | 44 |
| 77                                 | 89:SP vs. 110:SP     | 1.102  | 1.077  | 0.02452  | 1.312 | 6 | 6 | 0.02643 | 44 |
| 78                                 | 89:SP vs. 110:SPLL   | 1.102  | 13.83  | -12.72   | 1.312 | 6 | 6 | 13.72   | 44 |
| 79                                 | 89:SPLL vs. 110:LL   | 4.336  | 0.6321 | 3.704    | 1.312 | 6 | 6 | 3.993   | 44 |
| 80                                 | 89:SPLL vs. 110:SP   | 4.336  | 1.077  | 3.259    | 1.312 | 6 | 6 | 3.514   | 44 |
| 81                                 | 89:SPLL vs. 110:SPLL | 4.336  | 13.83  | -9.489   | 1.312 | 6 | 6 | 10.23   | 44 |
| 82                                 | 110:LL vs. 110:SP    | 0.6321 | 1.077  | -0.445   | 1.312 | 6 | 6 | 0.4797  | 44 |
| 83                                 | 110:LL vs. 110:SPLL  | 0.6321 | 13.83  | -13.19   | 1.312 | 6 | 6 | 14.22   | 44 |
| 84                                 | 110:SP vs. 110:SPLL  | 1.077  | 13.83  | -12.75   | 1.312 | 6 | 6 | 13.74   | 44 |

| 2way ANOVA<br>Tabular results |                          |                           |         |                 |                   |          |
|-------------------------------|--------------------------|---------------------------|---------|-----------------|-------------------|----------|
| 1                             | Table Analyzed           | Cand.genes 2013 ST6GALNAC |         |                 |                   |          |
| 2                             |                          |                           |         |                 |                   |          |
| 3                             | Two-way ANOVA            | Ordinary                  |         |                 |                   |          |
| 4                             | Alpha                    | 0.05                      |         |                 |                   |          |
| 5                             |                          |                           |         |                 |                   |          |
| 6                             | Source of Variation      | % of total variation      | P value | P value summary | Significant?      |          |
| 7                             | Interaction              | 21.24                     | <0.0001 | ****            | Yes               |          |
| 8                             | Time                     | 15.81                     | <0.0001 | ****            | Yes               |          |
| 9                             | Treatment                | 37.79                     | <0.0001 | ****            | Yes               |          |
| 10                            |                          |                           |         |                 |                   |          |
| 11                            | ANOVA table              | SS (Type III)             | DF      | MS              | F (DFn, DFd)      | P value  |
| 12                            | Interaction              | 240.3                     | 4       | 60.06           | F (4, 44) = 10.67 | P<0.0001 |
| 13                            | Time                     | 178.9                     | 2       | 89.44           | F (2, 44) = 15.89 | P<0.0001 |
| 14                            | Treatment                | 427.4                     | 2       | 213.7           | F (2, 44) = 37.98 | P<0.0001 |
| 15                            | Residual                 | 247.6                     | 44      | 5.628           |                   |          |
| 16                            |                          |                           |         |                 |                   |          |
| 17                            | Number of missing values | 1                         |         |                 |                   |          |

| 2way ANOVA<br>Multiple comparisons |                                                   |            |                    |              |         |                  |  |  |  |
|------------------------------------|---------------------------------------------------|------------|--------------------|--------------|---------|------------------|--|--|--|
| 1                                  | Compare cell means regardless of rows and columns |            |                    |              |         |                  |  |  |  |
| 2                                  |                                                   |            |                    |              |         |                  |  |  |  |
| 3                                  | Number of families                                | 1          |                    |              |         |                  |  |  |  |
| 4                                  | Number of comparisons per family                  | 36         |                    |              |         |                  |  |  |  |
| 5                                  | Alpha                                             | 0.05       |                    |              |         |                  |  |  |  |
| 6                                  |                                                   |            |                    |              |         |                  |  |  |  |
| 7                                  | Tukey's multiple comparisons test                 | Mean Diff. | 95.00% CI of diff. | Significant? | Summary | Adjusted P Value |  |  |  |
| 8                                  |                                                   |            |                    |              |         |                  |  |  |  |
| 9                                  | 68:LL vs. 68:SP                                   | 0.3867     | -4.079 to 4.853    | No           | ns      | >0.9999          |  |  |  |
| 10                                 | 68:LL vs. 68:SPLL                                 | 0.6079     | -4.076 to 5.292    | No           | ns      | >0.9999          |  |  |  |
| 11                                 | 68:LL vs. 89:LL                                   | -2.575     | -7.041 to 1.891    | No           | ns      | 0.6304           |  |  |  |
| 12                                 | 68:LL vs. 89:SP                                   | 0.7663     | -3.7 to 5.232      | No           | ns      | 0.9997           |  |  |  |
| 13                                 | 68:LL vs. 89:SPLL                                 | -9.304     | -13.77 to -4.838   | Yes          | ****    | <0.0001          |  |  |  |
| 14                                 | 68:LL vs. 110:LL                                  | -0.7876    | -5.254 to 3.679    | No           | ns      | 0.9997           |  |  |  |
| 15                                 | 68:LL vs. 110:SP                                  | 0.2937     | -4.172 to 4.76     | No           | ns      | >0.9999          |  |  |  |
| 16                                 | 68:LL vs. 110:SPLL                                | -10.06     | -14.52 to -5.592   | Yes          | ****    | <0.0001          |  |  |  |
| 17                                 | 68:SP vs. 68:SPLL                                 | 0.2212     | -4.463 to 4.905    | No           | ns      | >0.9999          |  |  |  |
| 18                                 | 68:SP vs. 89:LL                                   | -2.962     | -7.428 to 1.505    | No           | ns      | 0.4469           |  |  |  |
| 19                                 | 68:SP vs. 89:SP                                   | 0.3796     | -4.087 to 4.846    | No           | ns      | >0.9999          |  |  |  |
| 20                                 | 68:SP vs. 89:SPLL                                 | -9.691     | -14.16 to -5.225   | Yes          | ****    | <0.0001          |  |  |  |
| 21                                 | 68:SP vs. 110:LL                                  | -1.174     | -5.64 to 3.292     | No           | ns      | 0.9941           |  |  |  |
| 22                                 | 68:SP vs. 110:SP                                  | -0.09297   | -4.559 to 4.373    | No           | ns      | >0.9999          |  |  |  |
| 23                                 | 68:SP vs. 110:SPLL                                | -10.44     | -14.91 to -5.979   | Yes          | ****    | <0.0001          |  |  |  |
| 24                                 | 68:SPLL vs. 89:LL                                 | -3.183     | -7.867 to 1.501    | No           | ns      | 0.4140           |  |  |  |
| 25                                 | 68:SPLL vs. 89:SP                                 | 0.1584     | -4.526 to 4.843    | No           | ns      | >0.9999          |  |  |  |
| 26                                 | 68:SPLL vs. 89:SPLL                               | -9.912     | -14.6 to -5.228    | Yes          | ****    | <0.0001          |  |  |  |
| 27                                 | 68:SPLL vs. 110:LL                                | -1.395     | -6.08 to 3.289     | No           | ns      | 0.9866           |  |  |  |
| 28                                 | 68:SPLL vs. 110:SP                                | -0.3141    | -4.998 to 4.37     | No           | ns      | >0.9999          |  |  |  |
| 29                                 | 68:SPLL vs. 110:SPLL                              | -10.67     | -15.35 to -5.982   | Yes          | ****    | <0.0001          |  |  |  |
| 30                                 | 89:LL vs. 89:SP                                   | 3.341      | -1.125 to 7.807    | No           | ns      | 0.2893           |  |  |  |



| 2way ANOVA<br>Multiple comparisons |                      |         |                  |            |             |         |    |        |    |
|------------------------------------|----------------------|---------|------------------|------------|-------------|---------|----|--------|----|
| 31                                 | 89:LL vs. 89:SPLL    | -6.729  | -11.2 to -2.263  | Yes        | ***         | 0.0004  |    |        |    |
| 32                                 | 89:LL vs. 110:LL     | 1.787   | -2.679 to 6.253  | No         | ns          | 0.9246  |    |        |    |
| 33                                 | 89:LL vs. 110:SP     | 2.869   | -1.598 to 7.335  | No         | ns          | 0.4900  |    |        |    |
| 34                                 | 89:LL vs. 110:SPLL   | -7.483  | -11.95 to -3.017 | Yes        | ****        | <0.0001 |    |        |    |
| 35                                 | 89:SP vs. 89:SPLL    | -10.07  | -14.54 to -5.604 | Yes        | ****        | <0.0001 |    |        |    |
| 36                                 | 89:SP vs. 110:LL     | -1.554  | -6.02 to 2.912   | No         | ns          | 0.9654  |    |        |    |
| 37                                 | 89:SP vs. 110:SP     | -0.4726 | -4.939 to 3.994  | No         | ns          | >0.9999 |    |        |    |
| 38                                 | 89:SP vs. 110:SPLL   | -10.82  | -15.29 to -6.358 | Yes        | ****        | <0.0001 |    |        |    |
| 39                                 | 89:SPLL vs. 110:LL   | 8.517   | 4.05 to 12.98    | Yes        | ****        | <0.0001 |    |        |    |
| 40                                 | 89:SPLL vs. 110:SP   | 9.598   | 5.132 to 14.06   | Yes        | ****        | <0.0001 |    |        |    |
| 41                                 | 89:SPLL vs. 110:SPLL | -0.7538 | -5.22 to 3.712   | No         | ns          | 0.9997  |    |        |    |
| 42                                 | 110:LL vs. 110:SP    | 1.081   | -3.385 to 5.548  | No         | ns          | 0.9966  |    |        |    |
| 43                                 | 110:LL vs. 110:SPLL  | -9.27   | -13.74 to -4.804 | Yes        | ****        | <0.0001 |    |        |    |
| 44                                 | 110:SP vs. 110:SPLL  | -10.35  | -14.82 to -5.886 | Yes        | ****        | <0.0001 |    |        |    |
| 45                                 |                      |         |                  |            |             |         |    |        |    |
| 46                                 |                      |         |                  |            |             |         |    |        |    |
| 47                                 | Test details         | Mean 1  | Mean 2           | Mean Diff. | SE of diff. | N1      | N2 | q      | DF |
| 48                                 |                      |         |                  |            |             |         |    |        |    |
| 49                                 | 68:LL vs. 68:SP      | 1.835   | 1.448            | 0.3867     | 1.37        | 6       | 6  | 0.3993 | 44 |
| 50                                 | 68:LL vs. 68:SPLL    | 1.835   | 1.227            | 0.6079     | 1.437       | 6       | 5  | 0.5984 | 44 |
| 51                                 | 68:LL vs. 89:LL      | 1.835   | 4.41             | -2.575     | 1.37        | 6       | 6  | 2.659  | 44 |
| 52                                 | 68:LL vs. 89:SP      | 1.835   | 1.069            | 0.7663     | 1.37        | 6       | 6  | 0.7912 | 44 |
| 53                                 | 68:LL vs. 89:SPLL    | 1.835   | 11.14            | -9.304     | 1.37        | 6       | 6  | 9.607  | 44 |
| 54                                 | 68:LL vs. 110:LL     | 1.835   | 2.623            | -0.7876    | 1.37        | 6       | 6  | 0.8132 | 44 |
| 55                                 | 68:LL vs. 110:SP     | 1.835   | 1.541            | 0.2937     | 1.37        | 6       | 6  | 0.3033 | 44 |
| 56                                 | 68:LL vs. 110:SPLL   | 1.835   | 11.89            | -10.06     | 1.37        | 6       | 6  | 10.39  | 44 |
| 57                                 | 68:SP vs. 68:SPLL    | 1.448   | 1.227            | 0.2212     | 1.437       | 6       | 5  | 0.2177 | 44 |
| 58                                 | 68:SP vs. 89:LL      | 1.448   | 4.41             | -2.962     | 1.37        | 6       | 6  | 3.058  | 44 |
| 59                                 | 68:SP vs. 89:SP      | 1.448   | 1.069            | 0.3796     | 1.37        | 6       | 6  | 0.3919 | 44 |
| 60                                 | 68:SP vs. 89:SPLL    | 1.448   | 11.14            | -9.691     | 1.37        | 6       | 6  | 10.01  | 44 |

| 2way ANOVA<br>Multiple comparisons |                      |       |       |          |       |   |   |         |    |
|------------------------------------|----------------------|-------|-------|----------|-------|---|---|---------|----|
| 61                                 | 68:SP vs. 110:LL     | 1.448 | 2.623 | -1.174   | 1.37  | 6 | 6 | 1.213   | 44 |
| 62                                 | 68:SP vs. 110:SP     | 1.448 | 1.541 | -0.09297 | 1.37  | 6 | 6 | 0.09599 | 44 |
| 63                                 | 68:SP vs. 110:SPLL   | 1.448 | 11.89 | -10.44   | 1.37  | 6 | 6 | 10.78   | 44 |
| 64                                 | 68:SPLL vs. 89:LL    | 1.227 | 4.41  | -3.183   | 1.437 | 5 | 6 | 3.133   | 44 |
| 65                                 | 68:SPLL vs. 89:SP    | 1.227 | 1.069 | 0.1584   | 1.437 | 5 | 6 | 0.156   | 44 |
| 66                                 | 68:SPLL vs. 89:SPLL  | 1.227 | 11.14 | -9.912   | 1.437 | 5 | 6 | 9.758   | 44 |
| 67                                 | 68:SPLL vs. 110:LL   | 1.227 | 2.623 | -1.395   | 1.437 | 5 | 6 | 1.374   | 44 |
| 68                                 | 68:SPLL vs. 110:SP   | 1.227 | 1.541 | -0.3141  | 1.437 | 5 | 6 | 0.3092  | 44 |
| 69                                 | 68:SPLL vs. 110:SPLL | 1.227 | 11.89 | -10.67   | 1.437 | 5 | 6 | 10.5    | 44 |
| 70                                 | 89:LL vs. 89:SP      | 4.41  | 1.069 | 3.341    | 1.37  | 6 | 6 | 3.45    | 44 |
| 71                                 | 89:LL vs. 89:SPLL    | 4.41  | 11.14 | -6.729   | 1.37  | 6 | 6 | 6.948   | 44 |
| 72                                 | 89:LL vs. 110:LL     | 4.41  | 2.623 | 1.787    | 1.37  | 6 | 6 | 1.845   | 44 |
| 73                                 | 89:LL vs. 110:SP     | 4.41  | 1.541 | 2.869    | 1.37  | 6 | 6 | 2.962   | 44 |
| 74                                 | 89:LL vs. 110:SPLL   | 4.41  | 11.89 | -7.483   | 1.37  | 6 | 6 | 7.727   | 44 |
| 75                                 | 89:SP vs. 89:SPLL    | 1.069 | 11.14 | -10.07   | 1.37  | 6 | 6 | 10.4    | 44 |
| 76                                 | 89:SP vs. 110:LL     | 1.069 | 2.623 | -1.554   | 1.37  | 6 | 6 | 1.604   | 44 |
| 77                                 | 89:SP vs. 110:SP     | 1.069 | 1.541 | -0.4726  | 1.37  | 6 | 6 | 0.4879  | 44 |
| 78                                 | 89:SP vs. 110:SPLL   | 1.069 | 11.89 | -10.82   | 1.37  | 6 | 6 | 11.18   | 44 |
| 79                                 | 89:SPLL vs. 110:LL   | 11.14 | 2.623 | 8.517    | 1.37  | 6 | 6 | 8.794   | 44 |
| 80                                 | 89:SPLL vs. 110:SP   | 11.14 | 1.541 | 9.598    | 1.37  | 6 | 6 | 9.91    | 44 |
| 81                                 | 89:SPLL vs. 110:SPLL | 11.14 | 11.89 | -0.7538  | 1.37  | 6 | 6 | 0.7783  | 44 |
| 82                                 | 110:LL vs. 110:SP    | 2.623 | 1.541 | 1.081    | 1.37  | 6 | 6 | 1.117   | 44 |
| 83                                 | 110:LL vs. 110:SPLL  | 2.623 | 11.89 | -9.27    | 1.37  | 6 | 6 | 9.572   | 44 |
| 84                                 | 110:SP vs. 110:SPLL  | 1.541 | 11.89 | -10.35   | 1.37  | 6 | 6 | 10.69   | 44 |

| 2way ANOVA<br>Tabular results |                          |                        |         |                 |                   |          |
|-------------------------------|--------------------------|------------------------|---------|-----------------|-------------------|----------|
| 1                             | Table Analyzed           | Cand.genes 2013 SLC5A7 |         |                 |                   |          |
| 2                             |                          |                        |         |                 |                   |          |
| 3                             | Two-way ANOVA            | Ordinary               |         |                 |                   |          |
| 4                             | Alpha                    | 0.05                   |         |                 |                   |          |
| 5                             |                          |                        |         |                 |                   |          |
| 6                             | Source of Variation      | % of total variation   | P value | P value summary | Significant?      |          |
| 7                             | Interaction              | 20.11                  | <0.0001 | ****            | Yes               |          |
| 8                             | Time                     | 16.62                  | <0.0001 | ****            | Yes               |          |
| 9                             | Treatment                | 34.76                  | <0.0001 | ****            | Yes               |          |
| 10                            |                          |                        |         |                 |                   |          |
| 11                            | ANOVA table              | SS (Type III)          | DF      | MS              | F (DFn, DFd)      | P value  |
| 12                            | Interaction              | 211.9                  | 4       | 52.98           | F (4, 44) = 8.518 | P<0.0001 |
| 13                            | Time                     | 175.1                  | 2       | 87.55           | F (2, 44) = 14.07 | P<0.0001 |
| 14                            | Treatment                | 366.3                  | 2       | 183.2           | F (2, 44) = 29.45 | P<0.0001 |
| 15                            | Residual                 | 273.7                  | 44      | 6.22            |                   |          |
| 16                            |                          |                        |         |                 |                   |          |
| 17                            | Number of missing values | 1                      |         |                 |                   |          |

| 2way ANOVA<br>Multiple comparisons |                                                   |            |                     |              |         |                  |  |  |
|------------------------------------|---------------------------------------------------|------------|---------------------|--------------|---------|------------------|--|--|
| 1                                  | Compare cell means regardless of rows and columns |            |                     |              |         |                  |  |  |
| 2                                  |                                                   |            |                     |              |         |                  |  |  |
| 3                                  | Number of families                                | 1          |                     |              |         |                  |  |  |
| 4                                  | Number of comparisons per family                  | 36         |                     |              |         |                  |  |  |
| 5                                  | Alpha                                             | 0.05       |                     |              |         |                  |  |  |
| 6                                  |                                                   |            |                     |              |         |                  |  |  |
| 7                                  | Tukey's multiple comparisons test                 | Mean Diff. | 95.00% CI of diff.  | Significant? | Summary | Adjusted P Value |  |  |
| 8                                  |                                                   |            |                     |              |         |                  |  |  |
| 9                                  | 68:LL vs. 68:SP                                   | 2.297      | -2.398 to 6.992     | No           | ns      | 0.8022           |  |  |
| 10                                 | 68:LL vs. 68:SPLL                                 | 1.824      | -3.101 to 6.748     | No           | ns      | 0.9506           |  |  |
| 11                                 | 68:LL vs. 89:LL                                   | -3.105     | -7.8 to 1.591       | No           | ns      | 0.4508           |  |  |
| 12                                 | 68:LL vs. 89:SP                                   | 2.47       | -2.225 to 7.165     | No           | ns      | 0.7341           |  |  |
| 13                                 | 68:LL vs. 89:SPLL                                 | -7.528     | -12.22 to -2.833    | Yes          | ***     | 0.0001           |  |  |
| 14                                 | 68:LL vs. 110:LL                                  | -0.04379   | -4.739 to 4.651     | No           | ns      | >0.9999          |  |  |
| 15                                 | 68:LL vs. 110:SP                                  | 1.054      | -3.642 to 5.749     | No           | ns      | 0.9980           |  |  |
| 16                                 | 68:LL vs. 110:SPLL                                | -7.925     | -12.62 to -3.229    | Yes          | ****    | <0.0001          |  |  |
| 17                                 | 68:SP vs. 68:SPLL                                 | -0.4733    | -5.398 to 4.451     | No           | ns      | >0.9999          |  |  |
| 18                                 | 68:SP vs. 89:LL                                   | -5.401     | -10.1 to -0.7062    | Yes          | *       | 0.0137           |  |  |
| 19                                 | 68:SP vs. 89:SP                                   | 0.1729     | -4.522 to 4.868     | No           | ns      | >0.9999          |  |  |
| 20                                 | 68:SP vs. 89:SPLL                                 | -9.825     | -14.52 to -5.13     | Yes          | ****    | <0.0001          |  |  |
| 21                                 | 68:SP vs. 110:LL                                  | -2.341     | -7.036 to 2.355     | No           | ns      | 0.7858           |  |  |
| 22                                 | 68:SP vs. 110:SP                                  | -1.243     | -5.939 to 3.452     | No           | ns      | 0.9938           |  |  |
| 23                                 | 68:SP vs. 110:SPLL                                | -10.22     | -14.92 to -5.526    | Yes          | ****    | <0.0001          |  |  |
| 24                                 | 68:SPLL vs. 89:LL                                 | -4.928     | -9.853 to -0.003688 | Yes          | *       | 0.0497           |  |  |
| 25                                 | 68:SPLL vs. 89:SP                                 | 0.6463     | -4.278 to 5.571     | No           | ns      | >0.9999          |  |  |
| 26                                 | 68:SPLL vs. 89:SPLL                               | -9.352     | -14.28 to -4.427    | Yes          | ****    | <0.0001          |  |  |
| 27                                 | 68:SPLL vs. 110:LL                                | -1.867     | -6.792 to 3.057     | No           | ns      | 0.9436           |  |  |
| 28                                 | 68:SPLL vs. 110:SP                                | -0.77      | -5.694 to 4.154     | No           | ns      | 0.9999           |  |  |
| 29                                 | 68:SPLL vs. 110:SPLL                              | -9.748     | -14.67 to -4.824    | Yes          | ****    | <0.0001          |  |  |
| 30                                 | 89:LL vs. 89:SP                                   | 5.574      | 0.8791 to 10.27     | Yes          | **      | 0.0097           |  |  |

| 2way ANOVA<br>Multiple comparisons |                      |         |                   |            |             |         |    |        |    |
|------------------------------------|----------------------|---------|-------------------|------------|-------------|---------|----|--------|----|
| 31                                 | 89:LL vs. 89:SPLL    | -4.423  | -9.119 to 0.2717  | No         | ns          | 0.0789  |    |        |    |
| 32                                 | 89:LL vs. 110:LL     | 3.061   | -1.635 to 7.756   | No         | ns          | 0.4700  |    |        |    |
| 33                                 | 89:LL vs. 110:SP     | 4.158   | -0.5372 to 8.853  | No         | ns          | 0.1197  |    |        |    |
| 34                                 | 89:LL vs. 110:SPLL   | -4.82   | -9.515 to -0.1248 | Yes        | *           | 0.0402  |    |        |    |
| 35                                 | 89:SP vs. 89:SPLL    | -9.998  | -14.69 to -5.303  | Yes        | ****        | <0.0001 |    |        |    |
| 36                                 | 89:SP vs. 110:LL     | -2.514  | -7.209 to 2.182   | No         | ns          | 0.7157  |    |        |    |
| 37                                 | 89:SP vs. 110:SP     | -1.416  | -6.112 to 3.279   | No         | ns          | 0.9855  |    |        |    |
| 38                                 | 89:SP vs. 110:SPLL   | -10.39  | -15.09 to -5.699  | Yes        | ****        | <0.0001 |    |        |    |
| 39                                 | 89:SPLL vs. 110:LL   | 7.484   | 2.789 to 12.18    | Yes        | ***         | 0.0002  |    |        |    |
| 40                                 | 89:SPLL vs. 110:SP   | 8.582   | 3.886 to 13.28    | Yes        | ****        | <0.0001 |    |        |    |
| 41                                 | 89:SPLL vs. 110:SPLL | -0.3965 | -5.092 to 4.299   | No         | ns          | >0.9999 |    |        |    |
| 42                                 | 110:LL vs. 110:SP    | 1.097   | -3.598 to 5.793   | No         | ns          | 0.9974  |    |        |    |
| 43                                 | 110:LL vs. 110:SPLL  | -7.881  | -12.58 to -3.186  | Yes        | ****        | <0.0001 |    |        |    |
| 44                                 | 110:SP vs. 110:SPLL  | -8.978  | -13.67 to -4.283  | Yes        | ****        | <0.0001 |    |        |    |
| 45                                 |                      |         |                   |            |             |         |    |        |    |
| 46                                 |                      |         |                   |            |             |         |    |        |    |
| 47                                 | Test details         | Mean 1  | Mean 2            | Mean Diff. | SE of diff. | N1      | N2 | q      | DF |
| 48                                 |                      |         |                   |            |             |         |    |        |    |
| 49                                 | 68:LL vs. 68:SP      | 3.835   | 1.538             | 2.297      | 1.44        | 6       | 6  | 2.256  | 44 |
| 50                                 | 68:LL vs. 68:SPLL    | 3.835   | 2.012             | 1.824      | 1.51        | 6       | 5  | 1.708  | 44 |
| 51                                 | 68:LL vs. 89:LL      | 3.835   | 6.94              | -3.105     | 1.44        | 6       | 6  | 3.049  | 44 |
| 52                                 | 68:LL vs. 89:SP      | 3.835   | 1.365             | 2.47       | 1.44        | 6       | 6  | 2.426  | 44 |
| 53                                 | 68:LL vs. 89:SPLL    | 3.835   | 11.36             | -7.528     | 1.44        | 6       | 6  | 7.394  | 44 |
| 54                                 | 68:LL vs. 110:LL     | 3.835   | 3.879             | -0.04379   | 1.44        | 6       | 6  | 0.043  | 44 |
| 55                                 | 68:LL vs. 110:SP     | 3.835   | 2.782             | 1.054      | 1.44        | 6       | 6  | 1.035  | 44 |
| 56                                 | 68:LL vs. 110:SPLL   | 3.835   | 11.76             | -7.925     | 1.44        | 6       | 6  | 7.783  | 44 |
| 57                                 | 68:SP vs. 68:SPLL    | 1.538   | 2.012             | -0.4733    | 1.51        | 6       | 5  | 0.4433 | 44 |
| 58                                 | 68:SP vs. 89:LL      | 1.538   | 6.94              | -5.401     | 1.44        | 6       | 6  | 5.305  | 44 |
| 59                                 | 68:SP vs. 89:SP      | 1.538   | 1.365             | 0.1729     | 1.44        | 6       | 6  | 0.1698 | 44 |
| 60                                 | 68:SP vs. 89:SPLL    | 1.538   | 11.36             | -9.825     | 1.44        | 6       | 6  | 9.649  | 44 |

| 2way ANOVA<br>Multiple comparisons |                      |       |       |         |      |   |   |        |    |
|------------------------------------|----------------------|-------|-------|---------|------|---|---|--------|----|
| 61                                 | 68:SP vs. 110:LL     | 1.538 | 3.879 | -2.341  | 1.44 | 6 | 6 | 2.299  | 44 |
| 62                                 | 68:SP vs. 110:SP     | 1.538 | 2.782 | -1.243  | 1.44 | 6 | 6 | 1.221  | 44 |
| 63                                 | 68:SP vs. 110:SPLL   | 1.538 | 11.76 | -10.22  | 1.44 | 6 | 6 | 10.04  | 44 |
| 64                                 | 68:SPLL vs. 89:LL    | 2.012 | 6.94  | -4.928  | 1.51 | 5 | 6 | 4.615  | 44 |
| 65                                 | 68:SPLL vs. 89:SP    | 2.012 | 1.365 | 0.6463  | 1.51 | 5 | 6 | 0.6052 | 44 |
| 66                                 | 68:SPLL vs. 89:SPLL  | 2.012 | 11.36 | -9.352  | 1.51 | 5 | 6 | 8.757  | 44 |
| 67                                 | 68:SPLL vs. 110:LL   | 2.012 | 3.879 | -1.867  | 1.51 | 5 | 6 | 1.749  | 44 |
| 68                                 | 68:SPLL vs. 110:SP   | 2.012 | 2.782 | -0.77   | 1.51 | 5 | 6 | 0.7211 | 44 |
| 69                                 | 68:SPLL vs. 110:SPLL | 2.012 | 11.76 | -9.748  | 1.51 | 5 | 6 | 9.128  | 44 |
| 70                                 | 89:LL vs. 89:SP      | 6.94  | 1.365 | 5.574   | 1.44 | 6 | 6 | 5.475  | 44 |
| 71                                 | 89:LL vs. 89:SPLL    | 6.94  | 11.36 | -4.423  | 1.44 | 6 | 6 | 4.345  | 44 |
| 72                                 | 89:LL vs. 110:LL     | 6.94  | 3.879 | 3.061   | 1.44 | 6 | 6 | 3.006  | 44 |
| 73                                 | 89:LL vs. 110:SP     | 6.94  | 2.782 | 4.158   | 1.44 | 6 | 6 | 4.084  | 44 |
| 74                                 | 89:LL vs. 110:SPLL   | 6.94  | 11.76 | -4.82   | 1.44 | 6 | 6 | 4.734  | 44 |
| 75                                 | 89:SP vs. 89:SPLL    | 1.365 | 11.36 | -9.998  | 1.44 | 6 | 6 | 9.819  | 44 |
| 76                                 | 89:SP vs. 110:LL     | 1.365 | 3.879 | -2.514  | 1.44 | 6 | 6 | 2.469  | 44 |
| 77                                 | 89:SP vs. 110:SP     | 1.365 | 2.782 | -1.416  | 1.44 | 6 | 6 | 1.391  | 44 |
| 78                                 | 89:SP vs. 110:SPLL   | 1.365 | 11.76 | -10.39  | 1.44 | 6 | 6 | 10.21  | 44 |
| 79                                 | 89:SPLL vs. 110:LL   | 11.36 | 3.879 | 7.484   | 1.44 | 6 | 6 | 7.351  | 44 |
| 80                                 | 89:SPLL vs. 110:SP   | 11.36 | 2.782 | 8.582   | 1.44 | 6 | 6 | 8.428  | 44 |
| 81                                 | 89:SPLL vs. 110:SPLL | 11.36 | 11.76 | -0.3965 | 1.44 | 6 | 6 | 0.3894 | 44 |
| 82                                 | 110:LL vs. 110:SP    | 3.879 | 2.782 | 1.097   | 1.44 | 6 | 6 | 1.078  | 44 |
| 83                                 | 110:LL vs. 110:SPLL  | 3.879 | 11.76 | -7.881  | 1.44 | 6 | 6 | 7.74   | 44 |
| 84                                 | 110:SP vs. 110:SPLL  | 2.782 | 11.76 | -8.978  | 1.44 | 6 | 6 | 8.818  | 44 |

| 2way ANOVA<br>Tabular results |                          |                       |         |                 |                   |          |
|-------------------------------|--------------------------|-----------------------|---------|-----------------|-------------------|----------|
| 1                             | Table Analyzed           | Cand.genes 2013 S100A |         |                 |                   |          |
| 2                             |                          |                       |         |                 |                   |          |
| 3                             | Two-way ANOVA            | Ordinary              |         |                 |                   |          |
| 4                             | Alpha                    | 0.05                  |         |                 |                   |          |
| 5                             |                          |                       |         |                 |                   |          |
| 6                             | Source of Variation      | % of total variation  | P value | P value summary | Significant?      |          |
| 7                             | Interaction              | 24.27                 | <0.0001 | ****            | Yes               |          |
| 8                             | Time                     | 13.88                 | <0.0001 | ****            | Yes               |          |
| 9                             | Treatment                | 33.5                  | <0.0001 | ****            | Yes               |          |
| 10                            |                          |                       |         |                 |                   |          |
| 11                            | ANOVA table              | SS (Type III)         | DF      | MS              | F (DFn, DFd)      | P value  |
| 12                            | Interaction              | 43130                 | 4       | 10783           | F (4, 44) = 10.41 | P<0.0001 |
| 13                            | Time                     | 24674                 | 2       | 12337           | F (2, 44) = 11.91 | P<0.0001 |
| 14                            | Treatment                | 59545                 | 2       | 29773           | F (2, 44) = 28.74 | P<0.0001 |
| 15                            | Residual                 | 45582                 | 44      | 1036            |                   |          |
| 16                            |                          |                       |         |                 |                   |          |
| 17                            | Number of missing values | 1                     |         |                 |                   |          |

| 2way ANOVA<br>Multiple comparisons |                                                   |            |                    |              |         |                  |  |  |  |
|------------------------------------|---------------------------------------------------|------------|--------------------|--------------|---------|------------------|--|--|--|
| 1                                  | Compare cell means regardless of rows and columns |            |                    |              |         |                  |  |  |  |
| 2                                  |                                                   |            |                    |              |         |                  |  |  |  |
| 3                                  | Number of families                                | 1          |                    |              |         |                  |  |  |  |
| 4                                  | Number of comparisons per family                  | 36         |                    |              |         |                  |  |  |  |
| 5                                  | Alpha                                             | 0.05       |                    |              |         |                  |  |  |  |
| 6                                  |                                                   |            |                    |              |         |                  |  |  |  |
| 7                                  | Tukey's multiple comparisons test                 | Mean Diff. | 95.00% CI of diff. | Significant? | Summary | Adjusted P Value |  |  |  |
| 8                                  |                                                   |            |                    |              |         |                  |  |  |  |
| 9                                  | 68:LL vs. 68:SP                                   | 21.47      | -39.12 to 82.06    | No           | ns      | 0.9615           |  |  |  |
| 10                                 | 68:LL vs. 68:SPLL                                 | 20.8       | -42.75 to 84.35    | No           | ns      | 0.9760           |  |  |  |
| 11                                 | 68:LL vs. 89:LL                                   | -32.9      | -93.5 to 27.69     | No           | ns      | 0.7003           |  |  |  |
| 12                                 | 68:LL vs. 89:SP                                   | 22.53      | -38.07 to 83.12    | No           | ns      | 0.9494           |  |  |  |
| 13                                 | 68:LL vs. 89:SPLL                                 | -78.36     | -139 to -17.77     | Yes          | **      | 0.0035           |  |  |  |
| 14                                 | 68:LL vs. 110:LL                                  | 2.995      | -57.6 to 63.59     | No           | ns      | >0.9999          |  |  |  |
| 15                                 | 68:LL vs. 110:SP                                  | 19.03      | -41.56 to 79.63    | No           | ns      | 0.9813           |  |  |  |
| 16                                 | 68:LL vs. 110:SPLL                                | -125.6     | -186.2 to -64.98   | Yes          | ****    | <0.0001          |  |  |  |
| 17                                 | 68:SP vs. 68:SPLL                                 | -0.6735    | -64.22 to 62.88    | No           | ns      | >0.9999          |  |  |  |
| 18                                 | 68:SP vs. 89:LL                                   | -54.38     | -115 to 6.219      | No           | ns      | 0.1100           |  |  |  |
| 19                                 | 68:SP vs. 89:SP                                   | 1.057      | -59.54 to 61.65    | No           | ns      | >0.9999          |  |  |  |
| 20                                 | 68:SP vs. 89:SPLL                                 | -99.83     | -160.4 to -39.24   | Yes          | ****    | <0.0001          |  |  |  |
| 21                                 | 68:SP vs. 110:LL                                  | -18.48     | -79.07 to 42.12    | No           | ns      | 0.9845           |  |  |  |
| 22                                 | 68:SP vs. 110:SP                                  | -2.438     | -63.03 to 58.16    | No           | ns      | >0.9999          |  |  |  |
| 23                                 | 68:SP vs. 110:SPLL                                | -147       | -207.6 to -86.45   | Yes          | ****    | <0.0001          |  |  |  |
| 24                                 | 68:SPLL vs. 89:LL                                 | -53.7      | -117.3 to 9.849    | No           | ns      | 0.1586           |  |  |  |
| 25                                 | 68:SPLL vs. 89:SP                                 | 1.73       | -61.82 to 65.28    | No           | ns      | >0.9999          |  |  |  |
| 26                                 | 68:SPLL vs. 89:SPLL                               | -99.16     | -162.7 to -35.61   | Yes          | ***     | 0.0002           |  |  |  |
| 27                                 | 68:SPLL vs. 110:LL                                | -17.8      | -81.35 to 45.75    | No           | ns      | 0.9910           |  |  |  |
| 28                                 | 68:SPLL vs. 110:SP                                | -1.765     | -65.32 to 61.79    | No           | ns      | >0.9999          |  |  |  |
| 29                                 | 68:SPLL vs. 110:SPLL                              | -146.4     | -209.9 to -82.82   | Yes          | ****    | <0.0001          |  |  |  |
| 30                                 | 89:LL vs. 89:SP                                   | 55.43      | -5.162 to 116      | No           | ns      | 0.0968           |  |  |  |



| 2way ANOVA<br>Multiple comparisons |                      |        |                  |            |             |         |    |         |    |
|------------------------------------|----------------------|--------|------------------|------------|-------------|---------|----|---------|----|
| 31                                 | 89:LL vs. 89:SPLL    | -45.46 | -106 to 15.14    | No         | ns          | 0.2859  |    |         |    |
| 32                                 | 89:LL vs. 110:LL     | 35.9   | -24.7 to 96.49   | No         | ns          | 0.5964  |    |         |    |
| 33                                 | 89:LL vs. 110:SP     | 51.94  | -8.657 to 112.5  | No         | ns          | 0.1461  |    |         |    |
| 34                                 | 89:LL vs. 110:SPLL   | -92.67 | -153.3 to -32.07 | Yes        | ***         | 0.0003  |    |         |    |
| 35                                 | 89:SP vs. 89:SPLL    | -100.9 | -161.5 to -40.29 | Yes        | ****        | <0.0001 |    |         |    |
| 36                                 | 89:SP vs. 110:LL     | -19.53 | -80.13 to 41.06  | No         | ns          | 0.9781  |    |         |    |
| 37                                 | 89:SP vs. 110:SP     | -3.495 | -64.09 to 57.1   | No         | ns          | >0.9999 |    |         |    |
| 38                                 | 89:SP vs. 110:SPLL   | -148.1 | -208.7 to -87.5  | Yes        | ****        | <0.0001 |    |         |    |
| 39                                 | 89:SPLL vs. 110:LL   | 81.35  | 20.76 to 141.9   | Yes        | **          | 0.0022  |    |         |    |
| 40                                 | 89:SPLL vs. 110:SP   | 97.39  | 36.8 to 158      | Yes        | ***         | 0.0001  |    |         |    |
| 41                                 | 89:SPLL vs. 110:SPLL | -47.21 | -107.8 to 13.38  | No         | ns          | 0.2414  |    |         |    |
| 42                                 | 110:LL vs. 110:SP    | 16.04  | -44.55 to 76.63  | No         | ns          | 0.9938  |    |         |    |
| 43                                 | 110:LL vs. 110:SPLL  | -128.6 | -189.2 to -67.97 | Yes        | ****        | <0.0001 |    |         |    |
| 44                                 | 110:SP vs. 110:SPLL  | -144.6 | -205.2 to -84.01 | Yes        | ****        | <0.0001 |    |         |    |
| 45                                 |                      |        |                  |            |             |         |    |         |    |
| 46                                 |                      |        |                  |            |             |         |    |         |    |
| 47                                 | Test details         | Mean 1 | Mean 2           | Mean Diff. | SE of diff. | N1      | N2 | q       | DF |
| 48                                 |                      |        |                  |            |             |         |    |         |    |
| 49                                 | 68:LL vs. 68:SP      | 31.75  | 10.28            | 21.47      | 18.58       | 6       | 6  | 1.634   | 44 |
| 50                                 | 68:LL vs. 68:SPLL    | 31.75  | 10.95            | 20.8       | 19.49       | 6       | 5  | 1.509   | 44 |
| 51                                 | 68:LL vs. 89:LL      | 31.75  | 64.66            | -32.9      | 18.58       | 6       | 6  | 2.504   | 44 |
| 52                                 | 68:LL vs. 89:SP      | 31.75  | 9.224            | 22.53      | 18.58       | 6       | 6  | 1.714   | 44 |
| 53                                 | 68:LL vs. 89:SPLL    | 31.75  | 110.1            | -78.36     | 18.58       | 6       | 6  | 5.963   | 44 |
| 54                                 | 68:LL vs. 110:LL     | 31.75  | 28.76            | 2.995      | 18.58       | 6       | 6  | 0.2279  | 44 |
| 55                                 | 68:LL vs. 110:SP     | 31.75  | 12.72            | 19.03      | 18.58       | 6       | 6  | 1.449   | 44 |
| 56                                 | 68:LL vs. 110:SPLL   | 31.75  | 157.3            | -125.6     | 18.58       | 6       | 6  | 9.556   | 44 |
| 57                                 | 68:SP vs. 68:SPLL    | 10.28  | 10.95            | -0.6735    | 19.49       | 6       | 5  | 0.04887 | 44 |
| 58                                 | 68:SP vs. 89:LL      | 10.28  | 64.66            | -54.38     | 18.58       | 6       | 6  | 4.138   | 44 |
| 59                                 | 68:SP vs. 89:SP      | 10.28  | 9.224            | 1.057      | 18.58       | 6       | 6  | 0.08043 | 44 |
| 60                                 | 68:SP vs. 89:SPLL    | 10.28  | 110.1            | -99.83     | 18.58       | 6       | 6  | 7.598   | 44 |

| 2way ANOVA<br>Multiple comparisons |                      |       |       |        |       |   |   |        |    |
|------------------------------------|----------------------|-------|-------|--------|-------|---|---|--------|----|
| 61                                 | 68:SP vs. 110:LL     | 10.28 | 28.76 | -18.48 | 18.58 | 6 | 6 | 1.406  | 44 |
| 62                                 | 68:SP vs. 110:SP     | 10.28 | 12.72 | -2.438 | 18.58 | 6 | 6 | 0.1855 | 44 |
| 63                                 | 68:SP vs. 110:SPLL   | 10.28 | 157.3 | -147   | 18.58 | 6 | 6 | 11.19  | 44 |
| 64                                 | 68:SPLL vs. 89:LL    | 10.95 | 64.66 | -53.7  | 19.49 | 5 | 6 | 3.897  | 44 |
| 65                                 | 68:SPLL vs. 89:SP    | 10.95 | 9.224 | 1.73   | 19.49 | 5 | 6 | 0.1256 | 44 |
| 66                                 | 68:SPLL vs. 89:SPLL  | 10.95 | 110.1 | -99.16 | 19.49 | 5 | 6 | 7.195  | 44 |
| 67                                 | 68:SPLL vs. 110:LL   | 10.95 | 28.76 | -17.8  | 19.49 | 5 | 6 | 1.292  | 44 |
| 68                                 | 68:SPLL vs. 110:SP   | 10.95 | 12.72 | -1.765 | 19.49 | 5 | 6 | 0.128  | 44 |
| 69                                 | 68:SPLL vs. 110:SPLL | 10.95 | 157.3 | -146.4 | 19.49 | 5 | 6 | 10.62  | 44 |
| 70                                 | 89:LL vs. 89:SP      | 64.66 | 9.224 | 55.43  | 18.58 | 6 | 6 | 4.219  | 44 |
| 71                                 | 89:LL vs. 89:SPLL    | 64.66 | 110.1 | -45.46 | 18.58 | 6 | 6 | 3.459  | 44 |
| 72                                 | 89:LL vs. 110:LL     | 64.66 | 28.76 | 35.9   | 18.58 | 6 | 6 | 2.732  | 44 |
| 73                                 | 89:LL vs. 110:SP     | 64.66 | 12.72 | 51.94  | 18.58 | 6 | 6 | 3.953  | 44 |
| 74                                 | 89:LL vs. 110:SPLL   | 64.66 | 157.3 | -92.67 | 18.58 | 6 | 6 | 7.052  | 44 |
| 75                                 | 89:SP vs. 89:SPLL    | 9.224 | 110.1 | -100.9 | 18.58 | 6 | 6 | 7.678  | 44 |
| 76                                 | 89:SP vs. 110:LL     | 9.224 | 28.76 | -19.53 | 18.58 | 6 | 6 | 1.487  | 44 |
| 77                                 | 89:SP vs. 110:SP     | 9.224 | 12.72 | -3.495 | 18.58 | 6 | 6 | 0.266  | 44 |
| 78                                 | 89:SP vs. 110:SPLL   | 9.224 | 157.3 | -148.1 | 18.58 | 6 | 6 | 11.27  | 44 |
| 79                                 | 89:SPLL vs. 110:LL   | 110.1 | 28.76 | 81.35  | 18.58 | 6 | 6 | 6.191  | 44 |
| 80                                 | 89:SPLL vs. 110:SP   | 110.1 | 12.72 | 97.39  | 18.58 | 6 | 6 | 7.412  | 44 |
| 81                                 | 89:SPLL vs. 110:SPLL | 110.1 | 157.3 | -47.21 | 18.58 | 6 | 6 | 3.593  | 44 |
| 82                                 | 110:LL vs. 110:SP    | 28.76 | 12.72 | 16.04  | 18.58 | 6 | 6 | 1.221  | 44 |
| 83                                 | 110:LL vs. 110:SPLL  | 28.76 | 157.3 | -128.6 | 18.58 | 6 | 6 | 9.784  | 44 |
| 84                                 | 110:SP vs. 110:SPLL  | 12.72 | 157.3 | -144.6 | 18.58 | 6 | 6 | 11     | 44 |
