# Supplementary material for: RNA profiling identifies novel, photoperiod-history dependent markers associated with enhanced saltwater performance in juvenile Atlantic salmon
Source: PubMed Central journal article supplement (PMC7141700; doi:10.1371/journal.pone.0227496), 2020-04-08
Supplement: pone.0227496.s008.pdf [file pone.0227496.s008.pdf]

| 2way ANOVA<br>Tabular results |                          |                      |         |                 |                   |          |
|-------------------------------|--------------------------|----------------------|---------|-----------------|-------------------|----------|
| 1                             | Table Analyzed           | CFTR I 2-ANOVA       |         |                 |                   |          |
| 2                             |                          |                      |         |                 |                   |          |
| 3                             | Two-way ANOVA            | Ordinary             |         |                 |                   |          |
| 4                             | Alpha                    | 0.05                 |         |                 |                   |          |
| 5                             |                          |                      |         |                 |                   |          |
| 6                             | Source of Variation      | % of total variation | P value | P value summary | Significant?      |          |
| 7                             | Interaction              | 10.17                | <0.0001 | ****            | Yes               |          |
| 8                             | Time                     | 62.43                | <0.0001 | ****            | Yes               |          |
| 9                             | Treatment                | 9.897                | <0.0001 | ****            | Yes               |          |
| 10                            |                          |                      |         |                 |                   |          |
| 11                            | ANOVA table              | SS                   | DF      | MS              | F (DFn, DFd)      | P value  |
| 12                            | Interaction              | 3.461                | 8       | 0.4326          | F (8, 75) = 5.446 | P<0.0001 |
| 13                            | Time                     | 21.25                | 4       | 5.312           | F (4, 75) = 66.87 | P<0.0001 |
| 14                            | Treatment                | 3.368                | 2       | 1.684           | F (2, 75) = 21.2  | P<0.0001 |
| 15                            | Residual                 | 5.958                | 75      | 0.07944         |                   |          |
| 16                            |                          |                      |         |                 |                   |          |
| 17                            | Number of missing values | 0                    |         |                 |                   |          |

| 2way ANOVA<br>Multiple comparisons |                                                                        |            |                    |              |         |                  |  |
|------------------------------------|------------------------------------------------------------------------|------------|--------------------|--------------|---------|------------------|--|
| 1                                  | Compare cell means regardless of rows and columns                      |            |                    |              |         |                  |  |
| 2                                  |                                                                        |            |                    |              |         |                  |  |
| 3                                  | Number of families                                                     | 1          |                    |              |         |                  |  |
| 4                                  | Number of comparisons per family                                       | 105        |                    |              |         |                  |  |
| 5                                  | Alpha                                                                  | 0.05       |                    |              |         |                  |  |
| 6                                  |                                                                        |            |                    |              |         |                  |  |
| 7                                  | Tukey's multiple comparisons test                                      | Mean Diff. | 95.00% CI of diff. | Significant? | Summary | Adjusted P Value |  |
| 8                                  |                                                                        |            |                    |              |         |                  |  |
| 9                                  | End of winter:2 week winter vs. End of winter:4 week winter            | 0.1092     | -0.4615 to 0.6799  | No           | ns      | >0.9999          |  |
| 10                                 | End of winter:2 week winter vs. End of winter:8 week winter            | 0.2742     | -0.2965 to 0.8449  | No           | ns      | 0.9312           |  |
| 11                                 | End of winter:2 week winter vs. 4 weeks post winter:2 week winter      | -0.3932    | -0.9639 to 0.1774  | No           | ns      | 0.5110           |  |
| 12                                 | End of winter:2 week winter vs. 4 weeks post winter:4 week winter      | -0.7041    | -1.275 to -0.1334  | Yes          | **      | 0.0039           |  |
| 13                                 | End of winter:2 week winter vs. 4 weeks post winter:8 week winter      | -0.9697    | -1.54 to -0.399    | Yes          | ****    | <0.0001          |  |
| 14                                 | End of winter:2 week winter vs. 8 weeks post winter:2 week winter      | -0.4283    | -0.999 to 0.1423   | No           | ns      | 0.3664           |  |
| 15                                 | End of winter:2 week winter vs. 8 weeks post winter:4 week winter      | -0.8716    | -1.442 to -0.3009  | Yes          | ****    | <0.0001          |  |
| 16                                 | End of winter:2 week winter vs. 8 weeks post winter:8 week winter      | -1.595     | -2.166 to -1.024   | Yes          | ****    | <0.0001          |  |
| 17                                 | End of winter:2 week winter vs. SPC -4 weeks post winter:2 week winter | 0.3781     | -0.1926 to 0.9488  | No           | ns      | 0.5769           |  |
| 18                                 | End of winter:2 week winter vs. SPC -4 weeks post winter:4 week winter | 0.2742     | -0.2965 to 0.8449  | No           | ns      | 0.9312           |  |
| 19                                 | End of winter:2 week winter vs. SPC -4 weeks post winter:8 week winter | 0.1176     | -0.4531 to 0.6882  | No           | ns      | >0.9999          |  |
| 20                                 | End of winter:2 week winter vs. SPC -8 weeks post winter:2 week winter | 0.2942     | -0.2765 to 0.8649  | No           | ns      | 0.8875           |  |
| 21                                 | End of winter:2 week winter vs. SPC -8 weeks post winter:4 week winter | 0.1176     | -0.4531 to 0.6882  | No           | ns      | >0.9999          |  |
| 22                                 | End of winter:2 week winter vs. SPC -8 weeks post winter:8 week winter | -0.328     | -0.8987 to 0.2426  | No           | ns      | 0.7825           |  |
| 23                                 | End of winter:4 week winter vs. End of winter:8 week winter            | 0.165      | -0.4057 to 0.7357  | No           | ns      | 0.9994           |  |
| 24                                 | End of winter:4 week winter vs. 4 weeks post winter:2 week winter      | -0.5024    | -1.073 to 0.06826  | No           | ns      | 0.1459           |  |
| 25                                 | End of winter:4 week winter vs. 4 weeks post winter:4 week winter      | -0.8133    | -1.384 to -0.2426  | Yes          | ***     | 0.0003           |  |
| 26                                 | End of winter:4 week winter vs. 4 weeks post winter:8 week winter      | -1.079     | -1.65 to -0.5082   | Yes          | ****    | <0.0001          |  |
| 27                                 | End of winter:4 week winter vs. 8 weeks post winter:2 week winter      | -0.5375    | -1.108 to 0.03317  | No           | ns      | 0.0862           |  |
| 28                                 | End of winter:4 week winter vs. 8 weeks post winter:4 week winter      | -0.9808    | -1.551 to -0.4101  | Yes          | ****    | <0.0001          |  |
| 29                                 | End of winter:4 week winter vs. 8 weeks post winter:8 week winter      | -1.704     | -2.275 to -1.133   | Yes          | ****    | <0.0001          |  |
| 30                                 | End of winter:4 week winter vs. SPC -4 weeks post winter:2 week winter | 0.2689     | -0.3018 to 0.8396  | No           | ns      | 0.9403           |  |

| 2way ANOVA<br>Multiple comparisons |                                                                              |          |                     |     |      |         |  |
|------------------------------------|------------------------------------------------------------------------------|----------|---------------------|-----|------|---------|--|
| 31                                 | End of winter:4 week winter vs. SPC -4 weeks post winter:4 week winter       | 0.165    | -0.4057 to 0.7357   | No  | ns   | 0.9994  |  |
| 32                                 | End of winter:4 week winter vs. SPC -4 weeks post winter:8 week winter       | 0.008374 | -0.5623 to 0.5791   | No  | ns   | >0.9999 |  |
| 33                                 | End of winter:4 week winter vs. SPC -8 weeks post winter:2 week winter       | 0.185    | -0.3857 to 0.7557   | No  | ns   | 0.9980  |  |
| 34                                 | End of winter:4 week winter vs. SPC -8 weeks post winter:4 week winter       | 0.008374 | -0.5623 to 0.5791   | No  | ns   | >0.9999 |  |
| 35                                 | End of winter:4 week winter vs. SPC -8 weeks post winter:8 week winter       | -0.4372  | -1.008 to 0.1335    | No  | ns   | 0.3331  |  |
| 36                                 | End of winter:8 week winter vs. 4 weeks post winter:2 week winter            | -0.6674  | -1.238 to -0.09674  | Yes | **   | 0.0082  |  |
| 37                                 | End of winter:8 week winter vs. 4 weeks post winter:4 week winter            | -0.9783  | -1.549 to -0.4076   | Yes | **** | <0.0001 |  |
| 38                                 | End of winter:8 week winter vs. 4 weeks post winter:8 week winter            | -1.244   | -1.815 to -0.6732   | Yes | **** | <0.0001 |  |
| 39                                 | End of winter:8 week winter vs. 8 weeks post winter:2 week winter            | -0.7025  | -1.273 to -0.1318   | Yes | **   | 0.0040  |  |
| 40                                 | End of winter:8 week winter vs. 8 weeks post winter:4 week winter            | -1.146   | -1.716 to -0.5751   | Yes | **** | <0.0001 |  |
| 41                                 | End of winter:8 week winter vs. 8 weeks post winter:8 week winter            | -1.869   | -2.44 to -1.298     | Yes | **** | <0.0001 |  |
| 42                                 | End of winter:8 week winter vs. SPC -4 weeks post winter:2 week winter       | 0.1039   | -0.4667 to 0.6746   | No  | ns   | >0.9999 |  |
| 43                                 | End of winter:8 week winter vs. SPC -4 weeks post winter:4 week winter       | 0        | -0.5707 to 0.5707   | No  | ns   | >0.9999 |  |
| 44                                 | End of winter:8 week winter vs. SPC -4 weeks post winter:8 week winter       | -0.1566  | -0.7273 to 0.4141   | No  | ns   | 0.9997  |  |
| 45                                 | End of winter:8 week winter vs. SPC -8 weeks post winter:2 week winter       | 0.02     | -0.5507 to 0.5907   | No  | ns   | >0.9999 |  |
| 46                                 | End of winter:8 week winter vs. SPC -8 weeks post winter:4 week winter       | -0.1566  | -0.7273 to 0.4141   | No  | ns   | 0.9997  |  |
| 47                                 | End of winter:8 week winter vs. SPC -8 weeks post winter:8 week winter       | -0.6022  | -1.173 to -0.03153  | Yes | *    | 0.0287  |  |
| 48                                 | 4 weeks post winter:2 week winter vs. 4 weeks post winter:4 week winter      | -0.3108  | -0.8815 to 0.2599   | No  | ns   | 0.8405  |  |
| 49                                 | 4 weeks post winter:2 week winter vs. 4 weeks post winter:8 week winter      | -0.5765  | -1.147 to -0.005775 | Yes | *    | 0.0453  |  |
| 50                                 | 4 weeks post winter:2 week winter vs. 8 weeks post winter:2 week winter      | -0.03509 | -0.6058 to 0.5356   | No  | ns   | >0.9999 |  |
| 51                                 | 4 weeks post winter:2 week winter vs. 8 weeks post winter:4 week winter      | -0.4784  | -1.049 to 0.09231   | No  | ns   | 0.2028  |  |
| 52                                 | 4 weeks post winter:2 week winter vs. 8 weeks post winter:8 week winter      | -1.202   | -1.772 to -0.6311   | Yes | **** | <0.0001 |  |
| 53                                 | 4 weeks post winter:2 week winter vs. SPC -4 weeks post winter:2 week winter | 0.7714   | 0.2007 to 1.342     | Yes | ***  | 0.0009  |  |
| 54                                 | 4 weeks post winter:2 week winter vs. SPC -4 weeks post winter:4 week winter | 0.6674   | 0.09674 to 1.238    | Yes | **   | 0.0082  |  |
| 55                                 | 4 weeks post winter:2 week winter vs. SPC -4 weeks post winter:8 week winter | 0.5108   | -0.05988 to 1.081   | No  | ns   | 0.1293  |  |
| 56                                 | 4 weeks post winter:2 week winter vs. SPC -8 weeks post winter:2 week winter | 0.6874   | 0.1167 to 1.258     | Yes | **   | 0.0055  |  |
| 57                                 | 4 weeks post winter:2 week winter vs. SPC -8 weeks post winter:4 week winter | 0.5108   | -0.05988 to 1.081   | No  | ns   | 0.1293  |  |
| 58                                 | 4 weeks post winter:2 week winter vs. SPC -8 weeks post winter:8 week winter | 0.0652   | -0.5055 to 0.6359   | No  | ns   | >0.9999 |  |
| 59                                 | 4 weeks post winter:4 week winter vs. 4 weeks post winter:8 week winter      | -0.2656  | -0.8363 to 0.3051   | No  | ns   | 0.9457  |  |
| 60                                 | 4 weeks post winter:4 week winter vs. 8 weeks post winter:2 week winter      | 0.2757   | -0.2949 to 0.8464   | No  | ns   | 0.9282  |  |

| 2way ANOVA<br>Multiple comparisons |                                                                              |         |                   |     |      |         |  |
|------------------------------------|------------------------------------------------------------------------------|---------|-------------------|-----|------|---------|--|
| 61                                 | 4 weeks post winter:4 week winter vs. 8 weeks post winter:4 week winter      | -0.1675 | -0.7382 to 0.4031 | No  | ns   | 0.9993  |  |
| 62                                 | 4 weeks post winter:4 week winter vs. 8 weeks post winter:8 week winter      | -0.8909 | -1.462 to -0.3202 | Yes | **** | <0.0001 |  |
| 63                                 | 4 weeks post winter:4 week winter vs. SPC -4 weeks post winter:2 week winter | 1.082   | 0.5115 to 1.653   | Yes | **** | <0.0001 |  |
| 64                                 | 4 weeks post winter:4 week winter vs. SPC -4 weeks post winter:4 week winter | 0.9783  | 0.4076 to 1.549   | Yes | **** | <0.0001 |  |
| 65                                 | 4 weeks post winter:4 week winter vs. SPC -4 weeks post winter:8 week winter | 0.8216  | 0.2509 to 1.392   | Yes | ***  | 0.0003  |  |
| 66                                 | 4 weeks post winter:4 week winter vs. SPC -8 weeks post winter:2 week winter | 0.9983  | 0.4276 to 1.569   | Yes | **** | <0.0001 |  |
| 67                                 | 4 weeks post winter:4 week winter vs. SPC -8 weeks post winter:4 week winter | 0.8216  | 0.2509 to 1.392   | Yes | ***  | 0.0003  |  |
| 68                                 | 4 weeks post winter:4 week winter vs. SPC -8 weeks post winter:8 week winter | 0.376   | -0.1947 to 0.9467 | No  | ns   | 0.5860  |  |
| 69                                 | 4 weeks post winter:8 week winter vs. 8 weeks post winter:2 week winter      | 0.5414  | -0.02931 to 1.112 | No  | ns   | 0.0811  |  |
| 70                                 | 4 weeks post winter:8 week winter vs. 8 weeks post winter:4 week winter      | 0.09809 | -0.4726 to 0.6688 | No  | ns   | >0.9999 |  |
| 71                                 | 4 weeks post winter:8 week winter vs. 8 weeks post winter:8 week winter      | -0.6253 | -1.196 to -0.0546 | Yes | *    | 0.0187  |  |
| 72                                 | 4 weeks post winter:8 week winter vs. SPC -4 weeks post winter:2 week winter | 1.348   | 0.7771 to 1.919   | Yes | **** | <0.0001 |  |
| 73                                 | 4 weeks post winter:8 week winter vs. SPC -4 weeks post winter:4 week winter | 1.244   | 0.6732 to 1.815   | Yes | **** | <0.0001 |  |
| 74                                 | 4 weeks post winter:8 week winter vs. SPC -4 weeks post winter:8 week winter | 1.087   | 0.5166 to 1.658   | Yes | **** | <0.0001 |  |
| 75                                 | 4 weeks post winter:8 week winter vs. SPC -8 weeks post winter:2 week winter | 1.264   | 0.6932 to 1.835   | Yes | **** | <0.0001 |  |
| 76                                 | 4 weeks post winter:8 week winter vs. SPC -8 weeks post winter:4 week winter | 1.087   | 0.5166 to 1.658   | Yes | **** | <0.0001 |  |
| 77                                 | 4 weeks post winter:8 week winter vs. SPC -8 weeks post winter:8 week winter | 0.6417  | 0.07098 to 1.212  | Yes | *    | 0.0137  |  |
| 78                                 | 8 weeks post winter:2 week winter vs. 8 weeks post winter:4 week winter      | -0.4433 | -1.014 to 0.1274  | No  | ns   | 0.3113  |  |
| 79                                 | 8 weeks post winter:2 week winter vs. 8 weeks post winter:8 week winter      | -1.167  | -1.737 to -0.596  | Yes | **** | <0.0001 |  |
| 80                                 | 8 weeks post winter:2 week winter vs. SPC -4 weeks post winter:2 week winter | 0.8065  | 0.2358 to 1.377   | Yes | ***  | 0.0004  |  |
| 81                                 | 8 weeks post winter:2 week winter vs. SPC -4 weeks post winter:4 week winter | 0.7025  | 0.1318 to 1.273   | Yes | **   | 0.0040  |  |
| 82                                 | 8 weeks post winter:2 week winter vs. SPC -4 weeks post winter:8 week winter | 0.5459  | -0.02479 to 1.117 | No  | ns   | 0.0754  |  |
| 83                                 | 8 weeks post winter:2 week winter vs. SPC -8 weeks post winter:2 week winter | 0.7225  | 0.1518 to 1.293   | Yes | **   | 0.0026  |  |
| 84                                 | 8 weeks post winter:2 week winter vs. SPC -8 weeks post winter:4 week winter | 0.5459  | -0.02479 to 1.117 | No  | ns   | 0.0754  |  |
| 85                                 | 8 weeks post winter:2 week winter vs. SPC -8 weeks post winter:8 week winter | 0.1003  | -0.4704 to 0.671  | No  | ns   | >0.9999 |  |
| 86                                 | 8 weeks post winter:4 week winter vs. 8 weeks post winter:8 week winter      | -0.7234 | -1.294 to -0.1527 | Yes | **   | 0.0026  |  |
| 87                                 | 8 weeks post winter:4 week winter vs. SPC -4 weeks post winter:2 week winter | 1.25    | 0.679 to 1.82     | Yes | **** | <0.0001 |  |
| 88                                 | 8 weeks post winter:4 week winter vs. SPC -4 weeks post winter:4 week winter | 1.146   | 0.5751 to 1.716   | Yes | **** | <0.0001 |  |
| 89                                 | 8 weeks post winter:4 week winter vs. SPC -4 weeks post winter:8 week winter | 0.9892  | 0.4185 to 1.56    | Yes | **** | <0.0001 |  |
| 90                                 | 8 weeks post winter:4 week winter vs. SPC -8 weeks post winter:2 week winter | 1.166   | 0.5951 to 1.736   | Yes | **** | <0.0001 |  |

| 2way ANOVA<br>Multiple comparisons |                                                                                   |          |                    |            |             |         |    |
|------------------------------------|-----------------------------------------------------------------------------------|----------|--------------------|------------|-------------|---------|----|
| 91                                 | 8 weeks post winter:4 week winter vs. SPC -8 weeks post winter:4 week winter      | 0.9892   | 0.4185 to 1.56     | Yes        | ****        | <0.0001 |    |
| 92                                 | 8 weeks post winter:4 week winter vs. SPC -8 weeks post winter:8 week winter      | 0.5436   | -0.02711 to 1.114  | No         | ns          | 0.0783  |    |
| 93                                 | 8 weeks post winter:8 week winter vs. SPC -4 weeks post winter:2 week winter      | 1.973    | 1.402 to 2.544     | Yes        | ****        | <0.0001 |    |
| 94                                 | 8 weeks post winter:8 week winter vs. SPC -4 weeks post winter:4 week winter      | 1.869    | 1.298 to 2.44      | Yes        | ****        | <0.0001 |    |
| 95                                 | 8 weeks post winter:8 week winter vs. SPC -4 weeks post winter:8 week winter      | 1.713    | 1.142 to 2.283     | Yes        | ****        | <0.0001 |    |
| 96                                 | 8 weeks post winter:8 week winter vs. SPC -8 weeks post winter:2 week winter      | 1.889    | 1.318 to 2.46      | Yes        | ****        | <0.0001 |    |
| 97                                 | 8 weeks post winter:8 week winter vs. SPC -8 weeks post winter:4 week winter      | 1.713    | 1.142 to 2.283     | Yes        | ****        | <0.0001 |    |
| 98                                 | 8 weeks post winter:8 week winter vs. SPC -8 weeks post winter:8 week winter      | 1.267    | 0.6963 to 1.838    | Yes        | ****        | <0.0001 |    |
| 99                                 | SPC -4 weeks post winter:2 week winter vs. SPC -4 weeks post winter:4 week winter | -0.1039  | -0.6746 to 0.4667  | No         | ns          | >0.9999 |    |
| 100                                | SPC -4 weeks post winter:2 week winter vs. SPC -4 weeks post winter:8 week winter | -0.2606  | -0.8312 to 0.3101  | No         | ns          | 0.9532  |    |
| 101                                | SPC -4 weeks post winter:2 week winter vs. SPC -8 weeks post winter:2 week winter | -0.08393 | -0.6546 to 0.4868  | No         | ns          | >0.9999 |    |
| 102                                | SPC -4 weeks post winter:2 week winter vs. SPC -8 weeks post winter:4 week winter | -0.2606  | -0.8312 to 0.3101  | No         | ns          | 0.9532  |    |
| 103                                | SPC -4 weeks post winter:2 week winter vs. SPC -8 weeks post winter:8 week winter | -0.7062  | -1.277 to -0.1355  | Yes        | **          | 0.0037  |    |
| 104                                | SPC -4 weeks post winter:4 week winter vs. SPC -4 weeks post winter:8 week winter | -0.1566  | -0.7273 to 0.4141  | No         | ns          | 0.9997  |    |
| 105                                | SPC -4 weeks post winter:4 week winter vs. SPC -8 weeks post winter:2 week winter | 0.02     | -0.5507 to 0.5907  | No         | ns          | >0.9999 |    |
| 106                                | SPC -4 weeks post winter:4 week winter vs. SPC -8 weeks post winter:4 week winter | -0.1566  | -0.7273 to 0.4141  | No         | ns          | 0.9997  |    |
| 107                                | SPC -4 weeks post winter:4 week winter vs. SPC -8 weeks post winter:8 week winter | -0.6022  | -1.173 to -0.03153 | Yes        | *           | 0.0287  |    |
| 108                                | SPC -4 weeks post winter:8 week winter vs. SPC -8 weeks post winter:2 week winter | 0.1766   | -0.3941 to 0.7473  | No         | ns          | 0.9988  |    |
| 109                                | SPC -4 weeks post winter:8 week winter vs. SPC -8 weeks post winter:4 week winter | 0        | -0.5707 to 0.5707  | No         | ns          | >0.9999 |    |
| 110                                | SPC -4 weeks post winter:8 week winter vs. SPC -8 weeks post winter:8 week winter | -0.4456  | -1.016 to 0.1251   | No         | ns          | 0.3033  |    |
| 111                                | SPC -8 weeks post winter:2 week winter vs. SPC -8 weeks post winter:4 week winter | -0.1766  | -0.7473 to 0.3941  | No         | ns          | 0.9988  |    |
| 112                                | SPC -8 weeks post winter:2 week winter vs. SPC -8 weeks post winter:8 week winter | -0.6222  | -1.193 to -0.05154 | Yes        | *           | 0.0198  |    |
| 113                                | SPC -8 weeks post winter:4 week winter vs. SPC -8 weeks post winter:8 week winter | -0.4456  | -1.016 to 0.1251   | No         | ns          | 0.3033  |    |
| 114                                |                                                                                   |          |                    |            |             |         |    |
| 115                                |                                                                                   |          |                    |            |             |         |    |
| 116                                | Test details                                                                      | Mean 1   | Mean 2             | Mean Diff. | SE of diff. | N1      | N2 |
| 117                                |                                                                                   |          |                    |            |             |         |    |
| 118                                | End of winter:2 week winter vs. End of winter:4 week winter                       | 0.6194   | 0.5102             | 0.1092     | 0.1627      | 6       | 6  |
| 119                                | End of winter:2 week winter vs. End of winter:8 week winter                       | 0.6194   | 0.3452             | 0.2742     | 0.1627      | 6       | 6  |
| 120                                | End of winter:2 week winter vs. 4 weeks post winter:2 week winter                 | 0.6194   | 1.013              | -0.3932    | 0.1627      | 6       | 6  |

| 2way ANOVA<br>Multiple comparisons |                                                                        |        |        |          |        |   |   |
|------------------------------------|------------------------------------------------------------------------|--------|--------|----------|--------|---|---|
| 121                                | End of winter:2 week winter vs. 4 weeks post winter:4 week winter      | 0.6194 | 1.323  | -0.7041  | 0.1627 | 6 | 6 |
| 122                                | End of winter:2 week winter vs. 4 weeks post winter:8 week winter      | 0.6194 | 1.589  | -0.9697  | 0.1627 | 6 | 6 |
| 123                                | End of winter:2 week winter vs. 8 weeks post winter:2 week winter      | 0.6194 | 1.048  | -0.4283  | 0.1627 | 6 | 6 |
| 124                                | End of winter:2 week winter vs. 8 weeks post winter:4 week winter      | 0.6194 | 1.491  | -0.8716  | 0.1627 | 6 | 6 |
| 125                                | End of winter:2 week winter vs. 8 weeks post winter:8 week winter      | 0.6194 | 2.214  | -1.595   | 0.1627 | 6 | 6 |
| 126                                | End of winter:2 week winter vs. SPC -4 weeks post winter:2 week winter | 0.6194 | 0.2413 | 0.3781   | 0.1627 | 6 | 6 |
| 127                                | End of winter:2 week winter vs. SPC -4 weeks post winter:4 week winter | 0.6194 | 0.3452 | 0.2742   | 0.1627 | 6 | 6 |
| 128                                | End of winter:2 week winter vs. SPC -4 weeks post winter:8 week winter | 0.6194 | 0.5018 | 0.1176   | 0.1627 | 6 | 6 |
| 129                                | End of winter:2 week winter vs. SPC -8 weeks post winter:2 week winter | 0.6194 | 0.3252 | 0.2942   | 0.1627 | 6 | 6 |
| 130                                | End of winter:2 week winter vs. SPC -8 weeks post winter:4 week winter | 0.6194 | 0.5018 | 0.1176   | 0.1627 | 6 | 6 |
| 131                                | End of winter:2 week winter vs. SPC -8 weeks post winter:8 week winter | 0.6194 | 0.9474 | -0.328   | 0.1627 | 6 | 6 |
| 132                                | End of winter:4 week winter vs. End of winter:8 week winter            | 0.5102 | 0.3452 | 0.165    | 0.1627 | 6 | 6 |
| 133                                | End of winter:4 week winter vs. 4 weeks post winter:2 week winter      | 0.5102 | 1.013  | -0.5024  | 0.1627 | 6 | 6 |
| 134                                | End of winter:4 week winter vs. 4 weeks post winter:4 week winter      | 0.5102 | 1.323  | -0.8133  | 0.1627 | 6 | 6 |
| 135                                | End of winter:4 week winter vs. 4 weeks post winter:8 week winter      | 0.5102 | 1.589  | -1.079   | 0.1627 | 6 | 6 |
| 136                                | End of winter:4 week winter vs. 8 weeks post winter:2 week winter      | 0.5102 | 1.048  | -0.5375  | 0.1627 | 6 | 6 |
| 137                                | End of winter:4 week winter vs. 8 weeks post winter:4 week winter      | 0.5102 | 1.491  | -0.9808  | 0.1627 | 6 | 6 |
| 138                                | End of winter:4 week winter vs. 8 weeks post winter:8 week winter      | 0.5102 | 2.214  | -1.704   | 0.1627 | 6 | 6 |
| 139                                | End of winter:4 week winter vs. SPC -4 weeks post winter:2 week winter | 0.5102 | 0.2413 | 0.2689   | 0.1627 | 6 | 6 |
| 140                                | End of winter:4 week winter vs. SPC -4 weeks post winter:4 week winter | 0.5102 | 0.3452 | 0.165    | 0.1627 | 6 | 6 |
| 141                                | End of winter:4 week winter vs. SPC -4 weeks post winter:8 week winter | 0.5102 | 0.5018 | 0.008374 | 0.1627 | 6 | 6 |
| 142                                | End of winter:4 week winter vs. SPC -8 weeks post winter:2 week winter | 0.5102 | 0.3252 | 0.185    | 0.1627 | 6 | 6 |
| 143                                | End of winter:4 week winter vs. SPC -8 weeks post winter:4 week winter | 0.5102 | 0.5018 | 0.008374 | 0.1627 | 6 | 6 |
| 144                                | End of winter:4 week winter vs. SPC -8 weeks post winter:8 week winter | 0.5102 | 0.9474 | -0.4372  | 0.1627 | 6 | 6 |
| 145                                | End of winter:8 week winter vs. 4 weeks post winter:2 week winter      | 0.3452 | 1.013  | -0.6674  | 0.1627 | 6 | 6 |
| 146                                | End of winter:8 week winter vs. 4 weeks post winter:4 week winter      | 0.3452 | 1.323  | -0.9783  | 0.1627 | 6 | 6 |
| 147                                | End of winter:8 week winter vs. 4 weeks post winter:8 week winter      | 0.3452 | 1.589  | -1.244   | 0.1627 | 6 | 6 |
| 148                                | End of winter:8 week winter vs. 8 weeks post winter:2 week winter      | 0.3452 | 1.048  | -0.7025  | 0.1627 | 6 | 6 |
| 149                                | End of winter:8 week winter vs. 8 weeks post winter:4 week winter      | 0.3452 | 1.491  | -1.146   | 0.1627 | 6 | 6 |
| 150                                | End of winter:8 week winter vs. 8 weeks post winter:8 week winter      | 0.3452 | 2.214  | -1.869   | 0.1627 | 6 | 6 |

| 2way ANOVA<br>Multiple comparisons |                                                                              |        |        |          |        |   |   |
|------------------------------------|------------------------------------------------------------------------------|--------|--------|----------|--------|---|---|
| 151                                | End of winter:8 week winter vs. SPC -4 weeks post winter:2 week winter       | 0.3452 | 0.2413 | 0.1039   | 0.1627 | 6 | 6 |
| 152                                | End of winter:8 week winter vs. SPC -4 weeks post winter:4 week winter       | 0.3452 | 0.3452 | 0        | 0.1627 | 6 | 6 |
| 153                                | End of winter:8 week winter vs. SPC -4 weeks post winter:8 week winter       | 0.3452 | 0.5018 | -0.1566  | 0.1627 | 6 | 6 |
| 154                                | End of winter:8 week winter vs. SPC -8 weeks post winter:2 week winter       | 0.3452 | 0.3252 | 0.02     | 0.1627 | 6 | 6 |
| 155                                | End of winter:8 week winter vs. SPC -8 weeks post winter:4 week winter       | 0.3452 | 0.5018 | -0.1566  | 0.1627 | 6 | 6 |
| 156                                | End of winter:8 week winter vs. SPC -8 weeks post winter:8 week winter       | 0.3452 | 0.9474 | -0.6022  | 0.1627 | 6 | 6 |
| 157                                | 4 weeks post winter:2 week winter vs. 4 weeks post winter:4 week winter      | 1.013  | 1.323  | -0.3108  | 0.1627 | 6 | 6 |
| 158                                | 4 weeks post winter:2 week winter vs. 4 weeks post winter:8 week winter      | 1.013  | 1.589  | -0.5765  | 0.1627 | 6 | 6 |
| 159                                | 4 weeks post winter:2 week winter vs. 8 weeks post winter:2 week winter      | 1.013  | 1.048  | -0.03509 | 0.1627 | 6 | 6 |
| 160                                | 4 weeks post winter:2 week winter vs. 8 weeks post winter:4 week winter      | 1.013  | 1.491  | -0.4784  | 0.1627 | 6 | 6 |
| 161                                | 4 weeks post winter:2 week winter vs. 8 weeks post winter:8 week winter      | 1.013  | 2.214  | -1.202   | 0.1627 | 6 | 6 |
| 162                                | 4 weeks post winter:2 week winter vs. SPC -4 weeks post winter:2 week winter | 1.013  | 0.2413 | 0.7714   | 0.1627 | 6 | 6 |
| 163                                | 4 weeks post winter:2 week winter vs. SPC -4 weeks post winter:4 week winter | 1.013  | 0.3452 | 0.6674   | 0.1627 | 6 | 6 |
| 164                                | 4 weeks post winter:2 week winter vs. SPC -4 weeks post winter:8 week winter | 1.013  | 0.5018 | 0.5108   | 0.1627 | 6 | 6 |
| 165                                | 4 weeks post winter:2 week winter vs. SPC -8 weeks post winter:2 week winter | 1.013  | 0.3252 | 0.6874   | 0.1627 | 6 | 6 |
| 166                                | 4 weeks post winter:2 week winter vs. SPC -8 weeks post winter:4 week winter | 1.013  | 0.5018 | 0.5108   | 0.1627 | 6 | 6 |
| 167                                | 4 weeks post winter:2 week winter vs. SPC -8 weeks post winter:8 week winter | 1.013  | 0.9474 | 0.0652   | 0.1627 | 6 | 6 |
| 168                                | 4 weeks post winter:4 week winter vs. 4 weeks post winter:8 week winter      | 1.323  | 1.589  | -0.2656  | 0.1627 | 6 | 6 |
| 169                                | 4 weeks post winter:4 week winter vs. 8 weeks post winter:2 week winter      | 1.323  | 1.048  | 0.2757   | 0.1627 | 6 | 6 |
| 170                                | 4 weeks post winter:4 week winter vs. 8 weeks post winter:4 week winter      | 1.323  | 1.491  | -0.1675  | 0.1627 | 6 | 6 |
| 171                                | 4 weeks post winter:4 week winter vs. 8 weeks post winter:8 week winter      | 1.323  | 2.214  | -0.8909  | 0.1627 | 6 | 6 |
| 172                                | 4 weeks post winter:4 week winter vs. SPC -4 weeks post winter:2 week winter | 1.323  | 0.2413 | 1.082    | 0.1627 | 6 | 6 |
| 173                                | 4 weeks post winter:4 week winter vs. SPC -4 weeks post winter:4 week winter | 1.323  | 0.3452 | 0.9783   | 0.1627 | 6 | 6 |
| 174                                | 4 weeks post winter:4 week winter vs. SPC -4 weeks post winter:8 week winter | 1.323  | 0.5018 | 0.8216   | 0.1627 | 6 | 6 |
| 175                                | 4 weeks post winter:4 week winter vs. SPC -8 weeks post winter:2 week winter | 1.323  | 0.3252 | 0.9983   | 0.1627 | 6 | 6 |
| 176                                | 4 weeks post winter:4 week winter vs. SPC -8 weeks post winter:4 week winter | 1.323  | 0.5018 | 0.8216   | 0.1627 | 6 | 6 |
| 177                                | 4 weeks post winter:4 week winter vs. SPC -8 weeks post winter:8 week winter | 1.323  | 0.9474 | 0.376    | 0.1627 | 6 | 6 |
| 178                                | 4 weeks post winter:8 week winter vs. 8 weeks post winter:2 week winter      | 1.589  | 1.048  | 0.5414   | 0.1627 | 6 | 6 |
| 179                                | 4 weeks post winter:8 week winter vs. 8 weeks post winter:4 week winter      | 1.589  | 1.491  | 0.09809  | 0.1627 | 6 | 6 |
| 180                                | 4 weeks post winter:8 week winter vs. 8 weeks post winter:8 week winter      | 1.589  | 2.214  | -0.6253  | 0.1627 | 6 | 6 |

| 2way ANOVA<br>Multiple comparisons |                                                                                   |        |        |          |        |   |   |
|------------------------------------|-----------------------------------------------------------------------------------|--------|--------|----------|--------|---|---|
| 181                                | 4 weeks post winter:8 week winter vs. SPC -4 weeks post winter:2 week winter      | 1.589  | 0.2413 | 1.348    | 0.1627 | 6 | 6 |
| 182                                | 4 weeks post winter:8 week winter vs. SPC -4 weeks post winter:4 week winter      | 1.589  | 0.3452 | 1.244    | 0.1627 | 6 | 6 |
| 183                                | 4 weeks post winter:8 week winter vs. SPC -4 weeks post winter:8 week winter      | 1.589  | 0.5018 | 1.087    | 0.1627 | 6 | 6 |
| 184                                | 4 weeks post winter:8 week winter vs. SPC -8 weeks post winter:2 week winter      | 1.589  | 0.3252 | 1.264    | 0.1627 | 6 | 6 |
| 185                                | 4 weeks post winter:8 week winter vs. SPC -8 weeks post winter:4 week winter      | 1.589  | 0.5018 | 1.087    | 0.1627 | 6 | 6 |
| 186                                | 4 weeks post winter:8 week winter vs. SPC -8 weeks post winter:8 week winter      | 1.589  | 0.9474 | 0.6417   | 0.1627 | 6 | 6 |
| 187                                | 8 weeks post winter:2 week winter vs. 8 weeks post winter:4 week winter           | 1.048  | 1.491  | -0.4433  | 0.1627 | 6 | 6 |
| 188                                | 8 weeks post winter:2 week winter vs. 8 weeks post winter:8 week winter           | 1.048  | 2.214  | -1.167   | 0.1627 | 6 | 6 |
| 189                                | 8 weeks post winter:2 week winter vs. SPC -4 weeks post winter:2 week winter      | 1.048  | 0.2413 | 0.8065   | 0.1627 | 6 | 6 |
| 190                                | 8 weeks post winter:2 week winter vs. SPC -4 weeks post winter:4 week winter      | 1.048  | 0.3452 | 0.7025   | 0.1627 | 6 | 6 |
| 191                                | 8 weeks post winter:2 week winter vs. SPC -4 weeks post winter:8 week winter      | 1.048  | 0.5018 | 0.5459   | 0.1627 | 6 | 6 |
| 192                                | 8 weeks post winter:2 week winter vs. SPC -8 weeks post winter:2 week winter      | 1.048  | 0.3252 | 0.7225   | 0.1627 | 6 | 6 |
| 193                                | 8 weeks post winter:2 week winter vs. SPC -8 weeks post winter:4 week winter      | 1.048  | 0.5018 | 0.5459   | 0.1627 | 6 | 6 |
| 194                                | 8 weeks post winter:2 week winter vs. SPC -8 weeks post winter:8 week winter      | 1.048  | 0.9474 | 0.1003   | 0.1627 | 6 | 6 |
| 195                                | 8 weeks post winter:4 week winter vs. 8 weeks post winter:8 week winter           | 1.491  | 2.214  | -0.7234  | 0.1627 | 6 | 6 |
| 196                                | 8 weeks post winter:4 week winter vs. SPC -4 weeks post winter:2 week winter      | 1.491  | 0.2413 | 1.25     | 0.1627 | 6 | 6 |
| 197                                | 8 weeks post winter:4 week winter vs. SPC -4 weeks post winter:4 week winter      | 1.491  | 0.3452 | 1.146    | 0.1627 | 6 | 6 |
| 198                                | 8 weeks post winter:4 week winter vs. SPC -4 weeks post winter:8 week winter      | 1.491  | 0.5018 | 0.9892   | 0.1627 | 6 | 6 |
| 199                                | 8 weeks post winter:4 week winter vs. SPC -8 weeks post winter:2 week winter      | 1.491  | 0.3252 | 1.166    | 0.1627 | 6 | 6 |
| 200                                | 8 weeks post winter:4 week winter vs. SPC -8 weeks post winter:4 week winter      | 1.491  | 0.5018 | 0.9892   | 0.1627 | 6 | 6 |
| 201                                | 8 weeks post winter:4 week winter vs. SPC -8 weeks post winter:8 week winter      | 1.491  | 0.9474 | 0.5436   | 0.1627 | 6 | 6 |
| 202                                | 8 weeks post winter:8 week winter vs. SPC -4 weeks post winter:2 week winter      | 2.214  | 0.2413 | 1.973    | 0.1627 | 6 | 6 |
| 203                                | 8 weeks post winter:8 week winter vs. SPC -4 weeks post winter:4 week winter      | 2.214  | 0.3452 | 1.869    | 0.1627 | 6 | 6 |
| 204                                | 8 weeks post winter:8 week winter vs. SPC -4 weeks post winter:8 week winter      | 2.214  | 0.5018 | 1.713    | 0.1627 | 6 | 6 |
| 205                                | 8 weeks post winter:8 week winter vs. SPC -8 weeks post winter:2 week winter      | 2.214  | 0.3252 | 1.889    | 0.1627 | 6 | 6 |
| 206                                | 8 weeks post winter:8 week winter vs. SPC -8 weeks post winter:4 week winter      | 2.214  | 0.5018 | 1.713    | 0.1627 | 6 | 6 |
| 207                                | 8 weeks post winter:8 week winter vs. SPC -8 weeks post winter:8 week winter      | 2.214  | 0.9474 | 1.267    | 0.1627 | 6 | 6 |
| 208                                | SPC -4 weeks post winter:2 week winter vs. SPC -4 weeks post winter:4 week winter | 0.2413 | 0.3452 | -0.1039  | 0.1627 | 6 | 6 |
| 209                                | SPC -4 weeks post winter:2 week winter vs. SPC -4 weeks post winter:8 week winter | 0.2413 | 0.5018 | -0.2606  | 0.1627 | 6 | 6 |
| 210                                | SPC -4 weeks post winter:2 week winter vs. SPC -8 weeks post winter:2 week winter | 0.2413 | 0.3252 | -0.08393 | 0.1627 | 6 | 6 |



| 2way ANOVA<br>Multiple comparisons |                                                                                   |        |        |         |        |   |   |
|------------------------------------|-----------------------------------------------------------------------------------|--------|--------|---------|--------|---|---|
| <b>211</b>                         | SPC -4 weeks post winter:2 week winter vs. SPC -8 weeks post winter:4 week winter | 0.2413 | 0.5018 | -0.2606 | 0.1627 | 6 | 6 |
| <b>212</b>                         | SPC -4 weeks post winter:2 week winter vs. SPC -8 weeks post winter:8 week winter | 0.2413 | 0.9474 | -0.7062 | 0.1627 | 6 | 6 |
| <b>213</b>                         | SPC -4 weeks post winter:4 week winter vs. SPC -4 weeks post winter:8 week winter | 0.3452 | 0.5018 | -0.1566 | 0.1627 | 6 | 6 |
| <b>214</b>                         | SPC -4 weeks post winter:4 week winter vs. SPC -8 weeks post winter:2 week winter | 0.3452 | 0.3252 | 0.02    | 0.1627 | 6 | 6 |
| <b>215</b>                         | SPC -4 weeks post winter:4 week winter vs. SPC -8 weeks post winter:4 week winter | 0.3452 | 0.5018 | -0.1566 | 0.1627 | 6 | 6 |
| <b>216</b>                         | SPC -4 weeks post winter:4 week winter vs. SPC -8 weeks post winter:8 week winter | 0.3452 | 0.9474 | -0.6022 | 0.1627 | 6 | 6 |
| <b>217</b>                         | SPC -4 weeks post winter:8 week winter vs. SPC -8 weeks post winter:2 week winter | 0.5018 | 0.3252 | 0.1766  | 0.1627 | 6 | 6 |
| <b>218</b>                         | SPC -4 weeks post winter:8 week winter vs. SPC -8 weeks post winter:4 week winter | 0.5018 | 0.5018 | 0       | 0.1627 | 6 | 6 |
| <b>219</b>                         | SPC -4 weeks post winter:8 week winter vs. SPC -8 weeks post winter:8 week winter | 0.5018 | 0.9474 | -0.4456 | 0.1627 | 6 | 6 |
| <b>220</b>                         | SPC -8 weeks post winter:2 week winter vs. SPC -8 weeks post winter:4 week winter | 0.3252 | 0.5018 | -0.1766 | 0.1627 | 6 | 6 |
| <b>221</b>                         | SPC -8 weeks post winter:2 week winter vs. SPC -8 weeks post winter:8 week winter | 0.3252 | 0.9474 | -0.6222 | 0.1627 | 6 | 6 |
| <b>222</b>                         | SPC -8 weeks post winter:4 week winter vs. SPC -8 weeks post winter:8 week winter | 0.5018 | 0.9474 | -0.4456 | 0.1627 | 6 | 6 |

|    |  |  |
|----|--|--|
|    |  |  |
|    |  |  |
|    |  |  |
| 1  |  |  |
| 2  |  |  |
| 3  |  |  |
| 4  |  |  |
| 5  |  |  |
| 6  |  |  |
| 7  |  |  |
| 8  |  |  |
| 9  |  |  |
| 10 |  |  |
| 11 |  |  |
| 12 |  |  |
| 13 |  |  |
| 14 |  |  |
| 15 |  |  |
| 16 |  |  |
| 17 |  |  |
| 18 |  |  |
| 19 |  |  |
| 20 |  |  |
| 21 |  |  |
| 22 |  |  |
| 23 |  |  |
| 24 |  |  |
| 25 |  |  |
| 26 |  |  |
| 27 |  |  |
| 28 |  |  |
| 29 |  |  |
| 30 |  |  |

|    |  |  |
|----|--|--|
|    |  |  |
|    |  |  |
|    |  |  |
| 31 |  |  |
| 32 |  |  |
| 33 |  |  |
| 34 |  |  |
| 35 |  |  |
| 36 |  |  |
| 37 |  |  |
| 38 |  |  |
| 39 |  |  |
| 40 |  |  |
| 41 |  |  |
| 42 |  |  |
| 43 |  |  |
| 44 |  |  |
| 45 |  |  |
| 46 |  |  |
| 47 |  |  |
| 48 |  |  |
| 49 |  |  |
| 50 |  |  |
| 51 |  |  |
| 52 |  |  |
| 53 |  |  |
| 54 |  |  |
| 55 |  |  |
| 56 |  |  |
| 57 |  |  |
| 58 |  |  |
| 59 |  |  |
| 60 |  |  |

|    |  |  |
|----|--|--|
|    |  |  |
|    |  |  |
|    |  |  |
| 61 |  |  |
| 62 |  |  |
| 63 |  |  |
| 64 |  |  |
| 65 |  |  |
| 66 |  |  |
| 67 |  |  |
| 68 |  |  |
| 69 |  |  |
| 70 |  |  |
| 71 |  |  |
| 72 |  |  |
| 73 |  |  |
| 74 |  |  |
| 75 |  |  |
| 76 |  |  |
| 77 |  |  |
| 78 |  |  |
| 79 |  |  |
| 80 |  |  |
| 81 |  |  |
| 82 |  |  |
| 83 |  |  |
| 84 |  |  |
| 85 |  |  |
| 86 |  |  |
| 87 |  |  |
| 88 |  |  |
| 89 |  |  |
| 90 |  |  |

|            |        |    |
|------------|--------|----|
|            |        |    |
|            |        |    |
|            |        |    |
| <b>91</b>  |        |    |
| <b>92</b>  |        |    |
| <b>93</b>  |        |    |
| <b>94</b>  |        |    |
| <b>95</b>  |        |    |
| <b>96</b>  |        |    |
| <b>97</b>  |        |    |
| <b>98</b>  |        |    |
| <b>99</b>  |        |    |
| <b>100</b> |        |    |
| <b>101</b> |        |    |
| <b>102</b> |        |    |
| <b>103</b> |        |    |
| <b>104</b> |        |    |
| <b>105</b> |        |    |
| <b>106</b> |        |    |
| <b>107</b> |        |    |
| <b>108</b> |        |    |
| <b>109</b> |        |    |
| <b>110</b> |        |    |
| <b>111</b> |        |    |
| <b>112</b> |        |    |
| <b>113</b> |        |    |
| <b>114</b> |        |    |
| <b>115</b> |        |    |
| <b>116</b> | q      | DF |
| <b>117</b> |        |    |
| <b>118</b> | 0.9489 | 75 |
| <b>119</b> | 2.383  | 75 |
| <b>120</b> | 3.418  | 75 |

|            |         |    |
|------------|---------|----|
|            |         |    |
|            |         |    |
|            |         |    |
| <b>121</b> | 6.119   | 75 |
| <b>122</b> | 8.427   | 75 |
| <b>123</b> | 3.723   | 75 |
| <b>124</b> | 7.575   | 75 |
| <b>125</b> | 13.86   | 75 |
| <b>126</b> | 3.286   | 75 |
| <b>127</b> | 2.383   | 75 |
| <b>128</b> | 1.022   | 75 |
| <b>129</b> | 2.557   | 75 |
| <b>130</b> | 1.022   | 75 |
| <b>131</b> | 2.851   | 75 |
| <b>132</b> | 1.434   | 75 |
| <b>133</b> | 4.366   | 75 |
| <b>134</b> | 7.068   | 75 |
| <b>135</b> | 9.376   | 75 |
| <b>136</b> | 4.671   | 75 |
| <b>137</b> | 8.524   | 75 |
| <b>138</b> | 14.81   | 75 |
| <b>139</b> | 2.337   | 75 |
| <b>140</b> | 1.434   | 75 |
| <b>141</b> | 0.07277 | 75 |
| <b>142</b> | 1.608   | 75 |
| <b>143</b> | 0.07277 | 75 |
| <b>144</b> | 3.8     | 75 |
| <b>145</b> | 5.8     | 75 |
| <b>146</b> | 8.502   | 75 |
| <b>147</b> | 10.81   | 75 |
| <b>148</b> | 6.105   | 75 |
| <b>149</b> | 9.958   | 75 |
| <b>150</b> | 16.24   | 75 |

|            |        |    |
|------------|--------|----|
|            |        |    |
|            |        |    |
|            |        |    |
| <b>151</b> | 0.9033 | 75 |
| <b>152</b> | 0      | 75 |
| <b>153</b> | 1.361  | 75 |
| <b>154</b> | 0.1738 | 75 |
| <b>155</b> | 1.361  | 75 |
| <b>156</b> | 5.234  | 75 |
| <b>157</b> | 2.701  | 75 |
| <b>158</b> | 5.01   | 75 |
| <b>159</b> | 0.305  | 75 |
| <b>160</b> | 4.157  | 75 |
| <b>161</b> | 10.44  | 75 |
| <b>162</b> | 6.704  | 75 |
| <b>163</b> | 5.8    | 75 |
| <b>164</b> | 4.439  | 75 |
| <b>165</b> | 5.974  | 75 |
| <b>166</b> | 4.439  | 75 |
| <b>167</b> | 0.5667 | 75 |
| <b>168</b> | 2.309  | 75 |
| <b>169</b> | 2.396  | 75 |
| <b>170</b> | 1.456  | 75 |
| <b>171</b> | 7.743  | 75 |
| <b>172</b> | 9.405  | 75 |
| <b>173</b> | 8.502  | 75 |
| <b>174</b> | 7.141  | 75 |
| <b>175</b> | 8.676  | 75 |
| <b>176</b> | 7.141  | 75 |
| <b>177</b> | 3.268  | 75 |
| <b>178</b> | 4.705  | 75 |
| <b>179</b> | 0.8524 | 75 |
| <b>180</b> | 5.434  | 75 |

|            |        |    |
|------------|--------|----|
|            |        |    |
|            |        |    |
|            |        |    |
| <b>181</b> | 11.71  | 75 |
| <b>182</b> | 10.81  | 75 |
| <b>183</b> | 9.449  | 75 |
| <b>184</b> | 10.98  | 75 |
| <b>185</b> | 9.449  | 75 |
| <b>186</b> | 5.577  | 75 |
| <b>187</b> | 3.852  | 75 |
| <b>188</b> | 10.14  | 75 |
| <b>189</b> | 7.009  | 75 |
| <b>190</b> | 6.105  | 75 |
| <b>191</b> | 4.744  | 75 |
| <b>192</b> | 6.279  | 75 |
| <b>193</b> | 4.744  | 75 |
| <b>194</b> | 0.8716 | 75 |
| <b>195</b> | 6.287  | 75 |
| <b>196</b> | 10.86  | 75 |
| <b>197</b> | 9.958  | 75 |
| <b>198</b> | 8.597  | 75 |
| <b>199</b> | 10.13  | 75 |
| <b>200</b> | 8.597  | 75 |
| <b>201</b> | 4.724  | 75 |
| <b>202</b> | 17.15  | 75 |
| <b>203</b> | 16.24  | 75 |
| <b>204</b> | 14.88  | 75 |
| <b>205</b> | 16.42  | 75 |
| <b>206</b> | 14.88  | 75 |
| <b>207</b> | 11.01  | 75 |
| <b>208</b> | 0.9033 | 75 |
| <b>209</b> | 2.264  | 75 |
| <b>210</b> | 0.7294 | 75 |



|            |        |    |
|------------|--------|----|
|            |        |    |
|            |        |    |
|            |        |    |
| <b>211</b> | 2.264  | 75 |
| <b>212</b> | 6.137  | 75 |
| <b>213</b> | 1.361  | 75 |
| <b>214</b> | 0.1738 | 75 |
| <b>215</b> | 1.361  | 75 |
| <b>216</b> | 5.234  | 75 |
| <b>217</b> | 1.535  | 75 |
| <b>218</b> | 0      | 75 |
| <b>219</b> | 3.873  | 75 |
| <b>220</b> | 1.535  | 75 |
| <b>221</b> | 5.408  | 75 |
| <b>222</b> | 3.873  | 75 |

| 2way ANOVA<br>Tabular results |                          |                      |         |                 |                   |          |
|-------------------------------|--------------------------|----------------------|---------|-----------------|-------------------|----------|
| 1                             | Table Analyzed           | NKA 2-ANOVA          |         |                 |                   |          |
| 2                             |                          |                      |         |                 |                   |          |
| 3                             | Two-way ANOVA            | Ordinary             |         |                 |                   |          |
| 4                             | Alpha                    | 0.05                 |         |                 |                   |          |
| 5                             |                          |                      |         |                 |                   |          |
| 6                             | Source of Variation      | % of total variation | P value | P value summary | Significant?      |          |
| 7                             | Interaction              | 5.186                | 0.0836  | ns              | No                |          |
| 8                             | Time                     | 62.11                | <0.0001 | ****            | Yes               |          |
| 9                             | Treatment                | 6.208                | 0.0004  | ***             | Yes               |          |
| 10                            |                          |                      |         |                 |                   |          |
| 11                            | ANOVA table              | SS                   | DF      | MS              | F (DFn, DFd)      | P value  |
| 12                            | Interaction              | 94.62                | 8       | 11.83           | F (8, 75) = 1.835 | P=0.0836 |
| 13                            | Time                     | 1133                 | 4       | 283.3           | F (4, 75) = 43.96 | P<0.0001 |
| 14                            | Treatment                | 113.3                | 2       | 56.63           | F (2, 75) = 8.787 | P=0.0004 |
| 15                            | Residual                 | 483.3                | 75      | 6.444           |                   |          |
| 16                            |                          |                      |         |                 |                   |          |
| 17                            | Number of missing values | 0                    |         |                 |                   |          |

| 2way ANOVA<br>Multiple comparisons |                                                                        |            |                    |              |         |                  |  |
|------------------------------------|------------------------------------------------------------------------|------------|--------------------|--------------|---------|------------------|--|
| 1                                  | Compare cell means regardless of rows and columns                      |            |                    |              |         |                  |  |
| 2                                  |                                                                        |            |                    |              |         |                  |  |
| 3                                  | Number of families                                                     | 1          |                    |              |         |                  |  |
| 4                                  | Number of comparisons per family                                       | 105        |                    |              |         |                  |  |
| 5                                  | Alpha                                                                  | 0.05       |                    |              |         |                  |  |
| 6                                  |                                                                        |            |                    |              |         |                  |  |
| 7                                  | Tukey's multiple comparisons test                                      | Mean Diff. | 95.00% CI of diff. | Significant? | Summary | Adjusted P Value |  |
| 8                                  |                                                                        |            |                    |              |         |                  |  |
| 9                                  | End of winter:2 week winter vs. End of winter:4 week winter            | 0.2993     | -4.841 to 5.439    | No           | ns      | >0.9999          |  |
| 10                                 | End of winter:2 week winter vs. End of winter:8 week winter            | 0.5384     | -4.602 to 5.678    | No           | ns      | >0.9999          |  |
| 11                                 | End of winter:2 week winter vs. 4 weeks post winter:2 week winter      | -6.003     | -11.14 to -0.8625  | Yes          | **      | 0.0084           |  |
| 12                                 | End of winter:2 week winter vs. 4 weeks post winter:4 week winter      | -7.602     | -12.74 to -2.462   | Yes          | ***     | 0.0002           |  |
| 13                                 | End of winter:2 week winter vs. 4 weeks post winter:8 week winter      | -8.31      | -13.45 to -3.17    | Yes          | ****    | <0.0001          |  |
| 14                                 | End of winter:2 week winter vs. 8 weeks post winter:2 week winter      | -4.064     | -9.204 to 1.076    | No           | ns      | 0.2843           |  |
| 15                                 | End of winter:2 week winter vs. 8 weeks post winter:4 week winter      | -7.953     | -13.09 to -2.813   | Yes          | ****    | <0.0001          |  |
| 16                                 | End of winter:2 week winter vs. 8 weeks post winter:8 week winter      | -11.11     | -16.25 to -5.965   | Yes          | ****    | <0.0001          |  |
| 17                                 | End of winter:2 week winter vs. SPC -4 weeks post winter:2 week winter | 0.7296     | -4.41 to 5.87      | No           | ns      | >0.9999          |  |
| 18                                 | End of winter:2 week winter vs. SPC -4 weeks post winter:4 week winter | 0.5384     | -4.602 to 5.678    | No           | ns      | >0.9999          |  |
| 19                                 | End of winter:2 week winter vs. SPC -4 weeks post winter:8 week winter | -1.18      | -6.32 to 3.96      | No           | ns      | >0.9999          |  |
| 20                                 | End of winter:2 week winter vs. SPC -8 weeks post winter:2 week winter | 0.006419   | -5.134 to 5.146    | No           | ns      | >0.9999          |  |
| 21                                 | End of winter:2 week winter vs. SPC -8 weeks post winter:4 week winter | -1.18      | -6.32 to 3.96      | No           | ns      | >0.9999          |  |
| 22                                 | End of winter:2 week winter vs. SPC -8 weeks post winter:8 week winter | -3.008     | -8.148 to 2.132    | No           | ns      | 0.7605           |  |
| 23                                 | End of winter:4 week winter vs. End of winter:8 week winter            | 0.2391     | -4.901 to 5.379    | No           | ns      | >0.9999          |  |
| 24                                 | End of winter:4 week winter vs. 4 weeks post winter:2 week winter      | -6.302     | -11.44 to -1.162   | Yes          | **      | 0.0042           |  |
| 25                                 | End of winter:4 week winter vs. 4 weeks post winter:4 week winter      | -7.901     | -13.04 to -2.761   | Yes          | ****    | <0.0001          |  |
| 26                                 | End of winter:4 week winter vs. 4 weeks post winter:8 week winter      | -8.609     | -13.75 to -3.469   | Yes          | ****    | <0.0001          |  |
| 27                                 | End of winter:4 week winter vs. 8 weeks post winter:2 week winter      | -4.363     | -9.503 to 0.7771   | No           | ns      | 0.1872           |  |
| 28                                 | End of winter:4 week winter vs. 8 weeks post winter:4 week winter      | -8.252     | -13.39 to -3.112   | Yes          | ****    | <0.0001          |  |
| 29                                 | End of winter:4 week winter vs. 8 weeks post winter:8 week winter      | -11.4      | -16.54 to -6.264   | Yes          | ****    | <0.0001          |  |
| 30                                 | End of winter:4 week winter vs. SPC -4 weeks post winter:2 week winter | 0.4303     | -4.71 to 5.57      | No           | ns      | >0.9999          |  |

| 2way ANOVA<br>Multiple comparisons |                                                                              |         |                   |     |      |         |  |
|------------------------------------|------------------------------------------------------------------------------|---------|-------------------|-----|------|---------|--|
| 31                                 | End of winter:4 week winter vs. SPC -4 weeks post winter:4 week winter       | 0.2391  | -4.901 to 5.379   | No  | ns   | >0.9999 |  |
| 32                                 | End of winter:4 week winter vs. SPC -4 weeks post winter:8 week winter       | -1.479  | -6.619 to 3.661   | No  | ns   | 0.9995  |  |
| 33                                 | End of winter:4 week winter vs. SPC -8 weeks post winter:2 week winter       | -0.2929 | -5.433 to 4.847   | No  | ns   | >0.9999 |  |
| 34                                 | End of winter:4 week winter vs. SPC -8 weeks post winter:4 week winter       | -1.479  | -6.619 to 3.661   | No  | ns   | 0.9995  |  |
| 35                                 | End of winter:4 week winter vs. SPC -8 weeks post winter:8 week winter       | -3.307  | -8.448 to 1.833   | No  | ns   | 0.6243  |  |
| 36                                 | End of winter:8 week winter vs. 4 weeks post winter:2 week winter            | -6.541  | -11.68 to -1.401  | Yes | **   | 0.0024  |  |
| 37                                 | End of winter:8 week winter vs. 4 weeks post winter:4 week winter            | -8.14   | -13.28 to -3      | Yes | **** | <0.0001 |  |
| 38                                 | End of winter:8 week winter vs. 4 weeks post winter:8 week winter            | -8.848  | -13.99 to -3.708  | Yes | **** | <0.0001 |  |
| 39                                 | End of winter:8 week winter vs. 8 weeks post winter:2 week winter            | -4.602  | -9.742 to 0.538   | No  | ns   | 0.1291  |  |
| 40                                 | End of winter:8 week winter vs. 8 weeks post winter:4 week winter            | -8.491  | -13.63 to -3.351  | Yes | **** | <0.0001 |  |
| 41                                 | End of winter:8 week winter vs. 8 weeks post winter:8 week winter            | -11.64  | -16.78 to -6.503  | Yes | **** | <0.0001 |  |
| 42                                 | End of winter:8 week winter vs. SPC -4 weeks post winter:2 week winter       | 0.1912  | -4.949 to 5.331   | No  | ns   | >0.9999 |  |
| 43                                 | End of winter:8 week winter vs. SPC -4 weeks post winter:4 week winter       | 0       | -5.14 to 5.14     | No  | ns   | >0.9999 |  |
| 44                                 | End of winter:8 week winter vs. SPC -4 weeks post winter:8 week winter       | -1.718  | -6.858 to 3.422   | No  | ns   | 0.9973  |  |
| 45                                 | End of winter:8 week winter vs. SPC -8 weeks post winter:2 week winter       | -0.532  | -5.672 to 4.608   | No  | ns   | >0.9999 |  |
| 46                                 | End of winter:8 week winter vs. SPC -8 weeks post winter:4 week winter       | -1.718  | -6.858 to 3.422   | No  | ns   | 0.9973  |  |
| 47                                 | End of winter:8 week winter vs. SPC -8 weeks post winter:8 week winter       | -3.547  | -8.687 to 1.593   | No  | ns   | 0.5088  |  |
| 48                                 | 4 weeks post winter:2 week winter vs. 4 weeks post winter:4 week winter      | -1.599  | -6.739 to 3.541   | No  | ns   | 0.9987  |  |
| 49                                 | 4 weeks post winter:2 week winter vs. 4 weeks post winter:8 week winter      | -2.307  | -7.447 to 2.833   | No  | ns   | 0.9591  |  |
| 50                                 | 4 weeks post winter:2 week winter vs. 8 weeks post winter:2 week winter      | 1.939   | -3.201 to 7.079   | No  | ns   | 0.9910  |  |
| 51                                 | 4 weeks post winter:2 week winter vs. 8 weeks post winter:4 week winter      | -1.95   | -7.09 to 3.19     | No  | ns   | 0.9905  |  |
| 52                                 | 4 weeks post winter:2 week winter vs. 8 weeks post winter:8 week winter      | -5.103  | -10.24 to 0.03741 | No  | ns   | 0.0537  |  |
| 53                                 | 4 weeks post winter:2 week winter vs. SPC -4 weeks post winter:2 week winter | 6.732   | 1.592 to 11.87    | Yes | **   | 0.0015  |  |
| 54                                 | 4 weeks post winter:2 week winter vs. SPC -4 weeks post winter:4 week winter | 6.541   | 1.401 to 11.68    | Yes | **   | 0.0024  |  |
| 55                                 | 4 weeks post winter:2 week winter vs. SPC -4 weeks post winter:8 week winter | 4.823   | -0.3173 to 9.963  | No  | ns   | 0.0890  |  |
| 56                                 | 4 weeks post winter:2 week winter vs. SPC -8 weeks post winter:2 week winter | 6.009   | 0.8689 to 11.15   | Yes | **   | 0.0083  |  |
| 57                                 | 4 weeks post winter:2 week winter vs. SPC -8 weeks post winter:4 week winter | 4.823   | -0.3173 to 9.963  | No  | ns   | 0.0890  |  |
| 58                                 | 4 weeks post winter:2 week winter vs. SPC -8 weeks post winter:8 week winter | 2.994   | -2.146 to 8.134   | No  | ns   | 0.7662  |  |
| 59                                 | 4 weeks post winter:4 week winter vs. 4 weeks post winter:8 week winter      | -0.708  | -5.848 to 4.432   | No  | ns   | >0.9999 |  |
| 60                                 | 4 weeks post winter:4 week winter vs. 8 weeks post winter:2 week winter      | 3.538   | -1.602 to 8.678   | No  | ns   | 0.5128  |  |

| 2way ANOVA<br>Multiple comparisons |                                                                              |         |                  |     |      |         |  |
|------------------------------------|------------------------------------------------------------------------------|---------|------------------|-----|------|---------|--|
| 61                                 | 4 weeks post winter:4 week winter vs. 8 weeks post winter:4 week winter      | -0.3511 | -5.491 to 4.789  | No  | ns   | >0.9999 |  |
| 62                                 | 4 weeks post winter:4 week winter vs. 8 weeks post winter:8 week winter      | -3.503  | -8.643 to 1.637  | No  | ns   | 0.5295  |  |
| 63                                 | 4 weeks post winter:4 week winter vs. SPC -4 weeks post winter:2 week winter | 8.331   | 3.191 to 13.47   | Yes | **** | <0.0001 |  |
| 64                                 | 4 weeks post winter:4 week winter vs. SPC -4 weeks post winter:4 week winter | 8.14    | 3 to 13.28       | Yes | **** | <0.0001 |  |
| 65                                 | 4 weeks post winter:4 week winter vs. SPC -4 weeks post winter:8 week winter | 6.422   | 1.282 to 11.56   | Yes | **   | 0.0032  |  |
| 66                                 | 4 weeks post winter:4 week winter vs. SPC -8 weeks post winter:2 week winter | 7.608   | 2.468 to 12.75   | Yes | ***  | 0.0002  |  |
| 67                                 | 4 weeks post winter:4 week winter vs. SPC -8 weeks post winter:4 week winter | 6.422   | 1.282 to 11.56   | Yes | **   | 0.0032  |  |
| 68                                 | 4 weeks post winter:4 week winter vs. SPC -8 weeks post winter:8 week winter | 4.593   | -0.5465 to 9.734 | No  | ns   | 0.1308  |  |
| 69                                 | 4 weeks post winter:8 week winter vs. 8 weeks post winter:2 week winter      | 4.246   | -0.8939 to 9.386 | No  | ns   | 0.2219  |  |
| 70                                 | 4 weeks post winter:8 week winter vs. 8 weeks post winter:4 week winter      | 0.3569  | -4.783 to 5.497  | No  | ns   | >0.9999 |  |
| 71                                 | 4 weeks post winter:8 week winter vs. 8 weeks post winter:8 week winter      | -2.795  | -7.935 to 2.345  | No  | ns   | 0.8419  |  |
| 72                                 | 4 weeks post winter:8 week winter vs. SPC -4 weeks post winter:2 week winter | 9.039   | 3.899 to 14.18   | Yes | **** | <0.0001 |  |
| 73                                 | 4 weeks post winter:8 week winter vs. SPC -4 weeks post winter:4 week winter | 8.848   | 3.708 to 13.99   | Yes | **** | <0.0001 |  |
| 74                                 | 4 weeks post winter:8 week winter vs. SPC -4 weeks post winter:8 week winter | 7.13    | 1.99 to 12.27    | Yes | ***  | 0.0006  |  |
| 75                                 | 4 weeks post winter:8 week winter vs. SPC -8 weeks post winter:2 week winter | 8.316   | 3.176 to 13.46   | Yes | **** | <0.0001 |  |
| 76                                 | 4 weeks post winter:8 week winter vs. SPC -8 weeks post winter:4 week winter | 7.13    | 1.99 to 12.27    | Yes | ***  | 0.0006  |  |
| 77                                 | 4 weeks post winter:8 week winter vs. SPC -8 weeks post winter:8 week winter | 5.302   | 0.1615 to 10.44  | Yes | *    | 0.0366  |  |
| 78                                 | 8 weeks post winter:2 week winter vs. 8 weeks post winter:4 week winter      | -3.889  | -9.029 to 1.251  | No  | ns   | 0.3532  |  |
| 79                                 | 8 weeks post winter:2 week winter vs. 8 weeks post winter:8 week winter      | -7.042  | -12.18 to -1.902 | Yes | ***  | 0.0007  |  |
| 80                                 | 8 weeks post winter:2 week winter vs. SPC -4 weeks post winter:2 week winter | 4.793   | -0.3468 to 9.933 | No  | ns   | 0.0937  |  |
| 81                                 | 8 weeks post winter:2 week winter vs. SPC -4 weeks post winter:4 week winter | 4.602   | -0.538 to 9.742  | No  | ns   | 0.1291  |  |
| 82                                 | 8 weeks post winter:2 week winter vs. SPC -4 weeks post winter:8 week winter | 2.884   | -2.256 to 8.024  | No  | ns   | 0.8101  |  |
| 83                                 | 8 weeks post winter:2 week winter vs. SPC -8 weeks post winter:2 week winter | 4.07    | -1.07 to 9.21    | No  | ns   | 0.2819  |  |
| 84                                 | 8 weeks post winter:2 week winter vs. SPC -8 weeks post winter:4 week winter | 2.884   | -2.256 to 8.024  | No  | ns   | 0.8101  |  |
| 85                                 | 8 weeks post winter:2 week winter vs. SPC -8 weeks post winter:8 week winter | 1.055   | -4.085 to 6.195  | No  | ns   | >0.9999 |  |
| 86                                 | 8 weeks post winter:4 week winter vs. 8 weeks post winter:8 week winter      | -3.152  | -8.292 to 1.988  | No  | ns   | 0.6971  |  |
| 87                                 | 8 weeks post winter:4 week winter vs. SPC -4 weeks post winter:2 week winter | 8.682   | 3.542 to 13.82   | Yes | **** | <0.0001 |  |
| 88                                 | 8 weeks post winter:4 week winter vs. SPC -4 weeks post winter:4 week winter | 8.491   | 3.351 to 13.63   | Yes | **** | <0.0001 |  |
| 89                                 | 8 weeks post winter:4 week winter vs. SPC -4 weeks post winter:8 week winter | 6.773   | 1.633 to 11.91   | Yes | **   | 0.0014  |  |
| 90                                 | 8 weeks post winter:4 week winter vs. SPC -8 weeks post winter:2 week winter | 7.959   | 2.819 to 13.1    | Yes | **** | <0.0001 |  |

| 2way ANOVA<br>Multiple comparisons |                                                                                   |         |                  |            |             |         |    |
|------------------------------------|-----------------------------------------------------------------------------------|---------|------------------|------------|-------------|---------|----|
| 91                                 | 8 weeks post winter:4 week winter vs. SPC -8 weeks post winter:4 week winter      | 6.773   | 1.633 to 11.91   | Yes        | **          | 0.0014  |    |
| 92                                 | 8 weeks post winter:4 week winter vs. SPC -8 weeks post winter:8 week winter      | 4.945   | -0.1955 to 10.08 | No         | ns          | 0.0717  |    |
| 93                                 | 8 weeks post winter:8 week winter vs. SPC -4 weeks post winter:2 week winter      | 11.83   | 6.695 to 16.97   | Yes        | ****        | <0.0001 |    |
| 94                                 | 8 weeks post winter:8 week winter vs. SPC -4 weeks post winter:4 week winter      | 11.64   | 6.503 to 16.78   | Yes        | ****        | <0.0001 |    |
| 95                                 | 8 weeks post winter:8 week winter vs. SPC -4 weeks post winter:8 week winter      | 9.925   | 4.785 to 15.07   | Yes        | ****        | <0.0001 |    |
| 96                                 | 8 weeks post winter:8 week winter vs. SPC -8 weeks post winter:2 week winter      | 11.11   | 5.972 to 16.25   | Yes        | ****        | <0.0001 |    |
| 97                                 | 8 weeks post winter:8 week winter vs. SPC -8 weeks post winter:4 week winter      | 9.925   | 4.785 to 15.07   | Yes        | ****        | <0.0001 |    |
| 98                                 | 8 weeks post winter:8 week winter vs. SPC -8 weeks post winter:8 week winter      | 8.097   | 2.957 to 13.24   | Yes        | ****        | <0.0001 |    |
| 99                                 | SPC -4 weeks post winter:2 week winter vs. SPC -4 weeks post winter:4 week winter | -0.1912 | -5.331 to 4.949  | No         | ns          | >0.9999 |    |
| 100                                | SPC -4 weeks post winter:2 week winter vs. SPC -4 weeks post winter:8 week winter | -1.909  | -7.049 to 3.231  | No         | ns          | 0.9922  |    |
| 101                                | SPC -4 weeks post winter:2 week winter vs. SPC -8 weeks post winter:2 week winter | -0.7232 | -5.863 to 4.417  | No         | ns          | >0.9999 |    |
| 102                                | SPC -4 weeks post winter:2 week winter vs. SPC -8 weeks post winter:4 week winter | -1.909  | -7.049 to 3.231  | No         | ns          | 0.9922  |    |
| 103                                | SPC -4 weeks post winter:2 week winter vs. SPC -8 weeks post winter:8 week winter | -3.738  | -8.878 to 1.402  | No         | ns          | 0.4192  |    |
| 104                                | SPC -4 weeks post winter:4 week winter vs. SPC -4 weeks post winter:8 week winter | -1.718  | -6.858 to 3.422  | No         | ns          | 0.9973  |    |
| 105                                | SPC -4 weeks post winter:4 week winter vs. SPC -8 weeks post winter:2 week winter | -0.532  | -5.672 to 4.608  | No         | ns          | >0.9999 |    |
| 106                                | SPC -4 weeks post winter:4 week winter vs. SPC -8 weeks post winter:4 week winter | -1.718  | -6.858 to 3.422  | No         | ns          | 0.9973  |    |
| 107                                | SPC -4 weeks post winter:4 week winter vs. SPC -8 weeks post winter:8 week winter | -3.547  | -8.687 to 1.593  | No         | ns          | 0.5088  |    |
| 108                                | SPC -4 weeks post winter:8 week winter vs. SPC -8 weeks post winter:2 week winter | 1.186   | -3.954 to 6.326  | No         | ns          | >0.9999 |    |
| 109                                | SPC -4 weeks post winter:8 week winter vs. SPC -8 weeks post winter:4 week winter | 0       | -5.14 to 5.14    | No         | ns          | >0.9999 |    |
| 110                                | SPC -4 weeks post winter:8 week winter vs. SPC -8 weeks post winter:8 week winter | -1.828  | -6.968 to 3.312  | No         | ns          | 0.9949  |    |
| 111                                | SPC -8 weeks post winter:2 week winter vs. SPC -8 weeks post winter:4 week winter | -1.186  | -6.326 to 3.954  | No         | ns          | >0.9999 |    |
| 112                                | SPC -8 weeks post winter:2 week winter vs. SPC -8 weeks post winter:8 week winter | -3.015  | -8.155 to 2.125  | No         | ns          | 0.7578  |    |
| 113                                | SPC -8 weeks post winter:4 week winter vs. SPC -8 weeks post winter:8 week winter | -1.828  | -6.968 to 3.312  | No         | ns          | 0.9949  |    |
| 114                                |                                                                                   |         |                  |            |             |         |    |
| 115                                |                                                                                   |         |                  |            |             |         |    |
| 116                                | Test details                                                                      | Mean 1  | Mean 2           | Mean Diff. | SE of diff. | N1      | N2 |
| 117                                |                                                                                   |         |                  |            |             |         |    |
| 118                                | End of winter:2 week winter vs. End of winter:4 week winter                       | 1.537   | 1.237            | 0.2993     | 1.466       | 6       | 6  |
| 119                                | End of winter:2 week winter vs. End of winter:8 week winter                       | 1.537   | 0.9983           | 0.5384     | 1.466       | 6       | 6  |
| 120                                | End of winter:2 week winter vs. 4 weeks post winter:2 week winter                 | 1.537   | 7.539            | -6.003     | 1.466       | 6       | 6  |

| 2way ANOVA<br>Multiple comparisons |                                                                        |        |        |          |       |   |   |
|------------------------------------|------------------------------------------------------------------------|--------|--------|----------|-------|---|---|
| 121                                | End of winter:2 week winter vs. 4 weeks post winter:4 week winter      | 1.537  | 9.138  | -7.602   | 1.466 | 6 | 6 |
| 122                                | End of winter:2 week winter vs. 4 weeks post winter:8 week winter      | 1.537  | 9.846  | -8.31    | 1.466 | 6 | 6 |
| 123                                | End of winter:2 week winter vs. 8 weeks post winter:2 week winter      | 1.537  | 5.6    | -4.064   | 1.466 | 6 | 6 |
| 124                                | End of winter:2 week winter vs. 8 weeks post winter:4 week winter      | 1.537  | 9.489  | -7.953   | 1.466 | 6 | 6 |
| 125                                | End of winter:2 week winter vs. 8 weeks post winter:8 week winter      | 1.537  | 12.64  | -11.11   | 1.466 | 6 | 6 |
| 126                                | End of winter:2 week winter vs. SPC -4 weeks post winter:2 week winter | 1.537  | 0.807  | 0.7296   | 1.466 | 6 | 6 |
| 127                                | End of winter:2 week winter vs. SPC -4 weeks post winter:4 week winter | 1.537  | 0.9983 | 0.5384   | 1.466 | 6 | 6 |
| 128                                | End of winter:2 week winter vs. SPC -4 weeks post winter:8 week winter | 1.537  | 2.716  | -1.18    | 1.466 | 6 | 6 |
| 129                                | End of winter:2 week winter vs. SPC -8 weeks post winter:2 week winter | 1.537  | 1.53   | 0.006419 | 1.466 | 6 | 6 |
| 130                                | End of winter:2 week winter vs. SPC -8 weeks post winter:4 week winter | 1.537  | 2.716  | -1.18    | 1.466 | 6 | 6 |
| 131                                | End of winter:2 week winter vs. SPC -8 weeks post winter:8 week winter | 1.537  | 4.545  | -3.008   | 1.466 | 6 | 6 |
| 132                                | End of winter:4 week winter vs. End of winter:8 week winter            | 1.237  | 0.9983 | 0.2391   | 1.466 | 6 | 6 |
| 133                                | End of winter:4 week winter vs. 4 weeks post winter:2 week winter      | 1.237  | 7.539  | -6.302   | 1.466 | 6 | 6 |
| 134                                | End of winter:4 week winter vs. 4 weeks post winter:4 week winter      | 1.237  | 9.138  | -7.901   | 1.466 | 6 | 6 |
| 135                                | End of winter:4 week winter vs. 4 weeks post winter:8 week winter      | 1.237  | 9.846  | -8.609   | 1.466 | 6 | 6 |
| 136                                | End of winter:4 week winter vs. 8 weeks post winter:2 week winter      | 1.237  | 5.6    | -4.363   | 1.466 | 6 | 6 |
| 137                                | End of winter:4 week winter vs. 8 weeks post winter:4 week winter      | 1.237  | 9.489  | -8.252   | 1.466 | 6 | 6 |
| 138                                | End of winter:4 week winter vs. 8 weeks post winter:8 week winter      | 1.237  | 12.64  | -11.4    | 1.466 | 6 | 6 |
| 139                                | End of winter:4 week winter vs. SPC -4 weeks post winter:2 week winter | 1.237  | 0.807  | 0.4303   | 1.466 | 6 | 6 |
| 140                                | End of winter:4 week winter vs. SPC -4 weeks post winter:4 week winter | 1.237  | 0.9983 | 0.2391   | 1.466 | 6 | 6 |
| 141                                | End of winter:4 week winter vs. SPC -4 weeks post winter:8 week winter | 1.237  | 2.716  | -1.479   | 1.466 | 6 | 6 |
| 142                                | End of winter:4 week winter vs. SPC -8 weeks post winter:2 week winter | 1.237  | 1.53   | -0.2929  | 1.466 | 6 | 6 |
| 143                                | End of winter:4 week winter vs. SPC -8 weeks post winter:4 week winter | 1.237  | 2.716  | -1.479   | 1.466 | 6 | 6 |
| 144                                | End of winter:4 week winter vs. SPC -8 weeks post winter:8 week winter | 1.237  | 4.545  | -3.307   | 1.466 | 6 | 6 |
| 145                                | End of winter:8 week winter vs. 4 weeks post winter:2 week winter      | 0.9983 | 7.539  | -6.541   | 1.466 | 6 | 6 |
| 146                                | End of winter:8 week winter vs. 4 weeks post winter:4 week winter      | 0.9983 | 9.138  | -8.14    | 1.466 | 6 | 6 |
| 147                                | End of winter:8 week winter vs. 4 weeks post winter:8 week winter      | 0.9983 | 9.846  | -8.848   | 1.466 | 6 | 6 |
| 148                                | End of winter:8 week winter vs. 8 weeks post winter:2 week winter      | 0.9983 | 5.6    | -4.602   | 1.466 | 6 | 6 |
| 149                                | End of winter:8 week winter vs. 8 weeks post winter:4 week winter      | 0.9983 | 9.489  | -8.491   | 1.466 | 6 | 6 |
| 150                                | End of winter:8 week winter vs. 8 weeks post winter:8 week winter      | 0.9983 | 12.64  | -11.64   | 1.466 | 6 | 6 |

| 2way ANOVA<br>Multiple comparisons |                                                                              |        |        |         |       |   |   |
|------------------------------------|------------------------------------------------------------------------------|--------|--------|---------|-------|---|---|
| 151                                | End of winter:8 week winter vs. SPC -4 weeks post winter:2 week winter       | 0.9983 | 0.807  | 0.1912  | 1.466 | 6 | 6 |
| 152                                | End of winter:8 week winter vs. SPC -4 weeks post winter:4 week winter       | 0.9983 | 0.9983 | 0       | 1.466 | 6 | 6 |
| 153                                | End of winter:8 week winter vs. SPC -4 weeks post winter:8 week winter       | 0.9983 | 2.716  | -1.718  | 1.466 | 6 | 6 |
| 154                                | End of winter:8 week winter vs. SPC -8 weeks post winter:2 week winter       | 0.9983 | 1.53   | -0.532  | 1.466 | 6 | 6 |
| 155                                | End of winter:8 week winter vs. SPC -8 weeks post winter:4 week winter       | 0.9983 | 2.716  | -1.718  | 1.466 | 6 | 6 |
| 156                                | End of winter:8 week winter vs. SPC -8 weeks post winter:8 week winter       | 0.9983 | 4.545  | -3.547  | 1.466 | 6 | 6 |
| 157                                | 4 weeks post winter:2 week winter vs. 4 weeks post winter:4 week winter      | 7.539  | 9.138  | -1.599  | 1.466 | 6 | 6 |
| 158                                | 4 weeks post winter:2 week winter vs. 4 weeks post winter:8 week winter      | 7.539  | 9.846  | -2.307  | 1.466 | 6 | 6 |
| 159                                | 4 weeks post winter:2 week winter vs. 8 weeks post winter:2 week winter      | 7.539  | 5.6    | 1.939   | 1.466 | 6 | 6 |
| 160                                | 4 weeks post winter:2 week winter vs. 8 weeks post winter:4 week winter      | 7.539  | 9.489  | -1.95   | 1.466 | 6 | 6 |
| 161                                | 4 weeks post winter:2 week winter vs. 8 weeks post winter:8 week winter      | 7.539  | 12.64  | -5.103  | 1.466 | 6 | 6 |
| 162                                | 4 weeks post winter:2 week winter vs. SPC -4 weeks post winter:2 week winter | 7.539  | 0.807  | 6.732   | 1.466 | 6 | 6 |
| 163                                | 4 weeks post winter:2 week winter vs. SPC -4 weeks post winter:4 week winter | 7.539  | 0.9983 | 6.541   | 1.466 | 6 | 6 |
| 164                                | 4 weeks post winter:2 week winter vs. SPC -4 weeks post winter:8 week winter | 7.539  | 2.716  | 4.823   | 1.466 | 6 | 6 |
| 165                                | 4 weeks post winter:2 week winter vs. SPC -8 weeks post winter:2 week winter | 7.539  | 1.53   | 6.009   | 1.466 | 6 | 6 |
| 166                                | 4 weeks post winter:2 week winter vs. SPC -8 weeks post winter:4 week winter | 7.539  | 2.716  | 4.823   | 1.466 | 6 | 6 |
| 167                                | 4 weeks post winter:2 week winter vs. SPC -8 weeks post winter:8 week winter | 7.539  | 4.545  | 2.994   | 1.466 | 6 | 6 |
| 168                                | 4 weeks post winter:4 week winter vs. 4 weeks post winter:8 week winter      | 9.138  | 9.846  | -0.708  | 1.466 | 6 | 6 |
| 169                                | 4 weeks post winter:4 week winter vs. 8 weeks post winter:2 week winter      | 9.138  | 5.6    | 3.538   | 1.466 | 6 | 6 |
| 170                                | 4 weeks post winter:4 week winter vs. 8 weeks post winter:4 week winter      | 9.138  | 9.489  | -0.3511 | 1.466 | 6 | 6 |
| 171                                | 4 weeks post winter:4 week winter vs. 8 weeks post winter:8 week winter      | 9.138  | 12.64  | -3.503  | 1.466 | 6 | 6 |
| 172                                | 4 weeks post winter:4 week winter vs. SPC -4 weeks post winter:2 week winter | 9.138  | 0.807  | 8.331   | 1.466 | 6 | 6 |
| 173                                | 4 weeks post winter:4 week winter vs. SPC -4 weeks post winter:4 week winter | 9.138  | 0.9983 | 8.14    | 1.466 | 6 | 6 |
| 174                                | 4 weeks post winter:4 week winter vs. SPC -4 weeks post winter:8 week winter | 9.138  | 2.716  | 6.422   | 1.466 | 6 | 6 |
| 175                                | 4 weeks post winter:4 week winter vs. SPC -8 weeks post winter:2 week winter | 9.138  | 1.53   | 7.608   | 1.466 | 6 | 6 |
| 176                                | 4 weeks post winter:4 week winter vs. SPC -8 weeks post winter:4 week winter | 9.138  | 2.716  | 6.422   | 1.466 | 6 | 6 |
| 177                                | 4 weeks post winter:4 week winter vs. SPC -8 weeks post winter:8 week winter | 9.138  | 4.545  | 4.593   | 1.466 | 6 | 6 |
| 178                                | 4 weeks post winter:8 week winter vs. 8 weeks post winter:2 week winter      | 9.846  | 5.6    | 4.246   | 1.466 | 6 | 6 |
| 179                                | 4 weeks post winter:8 week winter vs. 8 weeks post winter:4 week winter      | 9.846  | 9.489  | 0.3569  | 1.466 | 6 | 6 |
| 180                                | 4 weeks post winter:8 week winter vs. 8 weeks post winter:8 week winter      | 9.846  | 12.64  | -2.795  | 1.466 | 6 | 6 |



| 2way ANOVA<br>Multiple comparisons |                                                                                   |       |        |         |       |   |   |
|------------------------------------|-----------------------------------------------------------------------------------|-------|--------|---------|-------|---|---|
| 181                                | 4 weeks post winter:8 week winter vs. SPC -4 weeks post winter:2 week winter      | 9.846 | 0.807  | 9.039   | 1.466 | 6 | 6 |
| 182                                | 4 weeks post winter:8 week winter vs. SPC -4 weeks post winter:4 week winter      | 9.846 | 0.9983 | 8.848   | 1.466 | 6 | 6 |
| 183                                | 4 weeks post winter:8 week winter vs. SPC -4 weeks post winter:8 week winter      | 9.846 | 2.716  | 7.13    | 1.466 | 6 | 6 |
| 184                                | 4 weeks post winter:8 week winter vs. SPC -8 weeks post winter:2 week winter      | 9.846 | 1.53   | 8.316   | 1.466 | 6 | 6 |
| 185                                | 4 weeks post winter:8 week winter vs. SPC -8 weeks post winter:4 week winter      | 9.846 | 2.716  | 7.13    | 1.466 | 6 | 6 |
| 186                                | 4 weeks post winter:8 week winter vs. SPC -8 weeks post winter:8 week winter      | 9.846 | 4.545  | 5.302   | 1.466 | 6 | 6 |
| 187                                | 8 weeks post winter:2 week winter vs. 8 weeks post winter:4 week winter           | 5.6   | 9.489  | -3.889  | 1.466 | 6 | 6 |
| 188                                | 8 weeks post winter:2 week winter vs. 8 weeks post winter:8 week winter           | 5.6   | 12.64  | -7.042  | 1.466 | 6 | 6 |
| 189                                | 8 weeks post winter:2 week winter vs. SPC -4 weeks post winter:2 week winter      | 5.6   | 0.807  | 4.793   | 1.466 | 6 | 6 |
| 190                                | 8 weeks post winter:2 week winter vs. SPC -4 weeks post winter:4 week winter      | 5.6   | 0.9983 | 4.602   | 1.466 | 6 | 6 |
| 191                                | 8 weeks post winter:2 week winter vs. SPC -4 weeks post winter:8 week winter      | 5.6   | 2.716  | 2.884   | 1.466 | 6 | 6 |
| 192                                | 8 weeks post winter:2 week winter vs. SPC -8 weeks post winter:2 week winter      | 5.6   | 1.53   | 4.07    | 1.466 | 6 | 6 |
| 193                                | 8 weeks post winter:2 week winter vs. SPC -8 weeks post winter:4 week winter      | 5.6   | 2.716  | 2.884   | 1.466 | 6 | 6 |
| 194                                | 8 weeks post winter:2 week winter vs. SPC -8 weeks post winter:8 week winter      | 5.6   | 4.545  | 1.055   | 1.466 | 6 | 6 |
| 195                                | 8 weeks post winter:4 week winter vs. 8 weeks post winter:8 week winter           | 9.489 | 12.64  | -3.152  | 1.466 | 6 | 6 |
| 196                                | 8 weeks post winter:4 week winter vs. SPC -4 weeks post winter:2 week winter      | 9.489 | 0.807  | 8.682   | 1.466 | 6 | 6 |
| 197                                | 8 weeks post winter:4 week winter vs. SPC -4 weeks post winter:4 week winter      | 9.489 | 0.9983 | 8.491   | 1.466 | 6 | 6 |
| 198                                | 8 weeks post winter:4 week winter vs. SPC -4 weeks post winter:8 week winter      | 9.489 | 2.716  | 6.773   | 1.466 | 6 | 6 |
| 199                                | 8 weeks post winter:4 week winter vs. SPC -8 weeks post winter:2 week winter      | 9.489 | 1.53   | 7.959   | 1.466 | 6 | 6 |
| 200                                | 8 weeks post winter:4 week winter vs. SPC -8 weeks post winter:4 week winter      | 9.489 | 2.716  | 6.773   | 1.466 | 6 | 6 |
| 201                                | 8 weeks post winter:4 week winter vs. SPC -8 weeks post winter:8 week winter      | 9.489 | 4.545  | 4.945   | 1.466 | 6 | 6 |
| 202                                | 8 weeks post winter:8 week winter vs. SPC -4 weeks post winter:2 week winter      | 12.64 | 0.807  | 11.83   | 1.466 | 6 | 6 |
| 203                                | 8 weeks post winter:8 week winter vs. SPC -4 weeks post winter:4 week winter      | 12.64 | 0.9983 | 11.64   | 1.466 | 6 | 6 |
| 204                                | 8 weeks post winter:8 week winter vs. SPC -4 weeks post winter:8 week winter      | 12.64 | 2.716  | 9.925   | 1.466 | 6 | 6 |
| 205                                | 8 weeks post winter:8 week winter vs. SPC -8 weeks post winter:2 week winter      | 12.64 | 1.53   | 11.11   | 1.466 | 6 | 6 |
| 206                                | 8 weeks post winter:8 week winter vs. SPC -8 weeks post winter:4 week winter      | 12.64 | 2.716  | 9.925   | 1.466 | 6 | 6 |
| 207                                | 8 weeks post winter:8 week winter vs. SPC -8 weeks post winter:8 week winter      | 12.64 | 4.545  | 8.097   | 1.466 | 6 | 6 |
| 208                                | SPC -4 weeks post winter:2 week winter vs. SPC -4 weeks post winter:4 week winter | 0.807 | 0.9983 | -0.1912 | 1.466 | 6 | 6 |
| 209                                | SPC -4 weeks post winter:2 week winter vs. SPC -4 weeks post winter:8 week winter | 0.807 | 2.716  | -1.909  | 1.466 | 6 | 6 |
| 210                                | SPC -4 weeks post winter:2 week winter vs. SPC -8 weeks post winter:2 week winter | 0.807 | 1.53   | -0.7232 | 1.466 | 6 | 6 |

| 2way ANOVA<br>Multiple comparisons |                                                                                   |        |       |        |       |   |   |
|------------------------------------|-----------------------------------------------------------------------------------|--------|-------|--------|-------|---|---|
| <b>211</b>                         | SPC -4 weeks post winter:2 week winter vs. SPC -8 weeks post winter:4 week winter | 0.807  | 2.716 | -1.909 | 1.466 | 6 | 6 |
| <b>212</b>                         | SPC -4 weeks post winter:2 week winter vs. SPC -8 weeks post winter:8 week winter | 0.807  | 4.545 | -3.738 | 1.466 | 6 | 6 |
| <b>213</b>                         | SPC -4 weeks post winter:4 week winter vs. SPC -4 weeks post winter:8 week winter | 0.9983 | 2.716 | -1.718 | 1.466 | 6 | 6 |
| <b>214</b>                         | SPC -4 weeks post winter:4 week winter vs. SPC -8 weeks post winter:2 week winter | 0.9983 | 1.53  | -0.532 | 1.466 | 6 | 6 |
| <b>215</b>                         | SPC -4 weeks post winter:4 week winter vs. SPC -8 weeks post winter:4 week winter | 0.9983 | 2.716 | -1.718 | 1.466 | 6 | 6 |
| <b>216</b>                         | SPC -4 weeks post winter:4 week winter vs. SPC -8 weeks post winter:8 week winter | 0.9983 | 4.545 | -3.547 | 1.466 | 6 | 6 |
| <b>217</b>                         | SPC -4 weeks post winter:8 week winter vs. SPC -8 weeks post winter:2 week winter | 2.716  | 1.53  | 1.186  | 1.466 | 6 | 6 |
| <b>218</b>                         | SPC -4 weeks post winter:8 week winter vs. SPC -8 weeks post winter:4 week winter | 2.716  | 2.716 | 0      | 1.466 | 6 | 6 |
| <b>219</b>                         | SPC -4 weeks post winter:8 week winter vs. SPC -8 weeks post winter:8 week winter | 2.716  | 4.545 | -1.828 | 1.466 | 6 | 6 |
| <b>220</b>                         | SPC -8 weeks post winter:2 week winter vs. SPC -8 weeks post winter:4 week winter | 1.53   | 2.716 | -1.186 | 1.466 | 6 | 6 |
| <b>221</b>                         | SPC -8 weeks post winter:2 week winter vs. SPC -8 weeks post winter:8 week winter | 1.53   | 4.545 | -3.015 | 1.466 | 6 | 6 |
| <b>222</b>                         | SPC -8 weeks post winter:4 week winter vs. SPC -8 weeks post winter:8 week winter | 2.716  | 4.545 | -1.828 | 1.466 | 6 | 6 |

| 1  |  |  |
|----|--|--|
| 2  |  |  |
| 3  |  |  |
| 4  |  |  |
| 5  |  |  |
| 6  |  |  |
| 7  |  |  |
| 8  |  |  |
| 9  |  |  |
| 10 |  |  |
| 11 |  |  |
| 12 |  |  |
| 13 |  |  |
| 14 |  |  |
| 15 |  |  |
| 16 |  |  |
| 17 |  |  |
| 18 |  |  |
| 19 |  |  |
| 20 |  |  |
| 21 |  |  |
| 22 |  |  |
| 23 |  |  |
| 24 |  |  |
| 25 |  |  |
| 26 |  |  |
| 27 |  |  |
| 28 |  |  |
| 29 |  |  |
| 30 |  |  |

|    |  |  |
|----|--|--|
|    |  |  |
|    |  |  |
|    |  |  |
| 31 |  |  |
| 32 |  |  |
| 33 |  |  |
| 34 |  |  |
| 35 |  |  |
| 36 |  |  |
| 37 |  |  |
| 38 |  |  |
| 39 |  |  |
| 40 |  |  |
| 41 |  |  |
| 42 |  |  |
| 43 |  |  |
| 44 |  |  |
| 45 |  |  |
| 46 |  |  |
| 47 |  |  |
| 48 |  |  |
| 49 |  |  |
| 50 |  |  |
| 51 |  |  |
| 52 |  |  |
| 53 |  |  |
| 54 |  |  |
| 55 |  |  |
| 56 |  |  |
| 57 |  |  |
| 58 |  |  |
| 59 |  |  |
| 60 |  |  |

|    |  |  |
|----|--|--|
|    |  |  |
|    |  |  |
|    |  |  |
| 61 |  |  |
| 62 |  |  |
| 63 |  |  |
| 64 |  |  |
| 65 |  |  |
| 66 |  |  |
| 67 |  |  |
| 68 |  |  |
| 69 |  |  |
| 70 |  |  |
| 71 |  |  |
| 72 |  |  |
| 73 |  |  |
| 74 |  |  |
| 75 |  |  |
| 76 |  |  |
| 77 |  |  |
| 78 |  |  |
| 79 |  |  |
| 80 |  |  |
| 81 |  |  |
| 82 |  |  |
| 83 |  |  |
| 84 |  |  |
| 85 |  |  |
| 86 |  |  |
| 87 |  |  |
| 88 |  |  |
| 89 |  |  |
| 90 |  |  |

|            |        |    |
|------------|--------|----|
|            |        |    |
|            |        |    |
|            |        |    |
| <b>91</b>  |        |    |
| <b>92</b>  |        |    |
| <b>93</b>  |        |    |
| <b>94</b>  |        |    |
| <b>95</b>  |        |    |
| <b>96</b>  |        |    |
| <b>97</b>  |        |    |
| <b>98</b>  |        |    |
| <b>99</b>  |        |    |
| <b>100</b> |        |    |
| <b>101</b> |        |    |
| <b>102</b> |        |    |
| <b>103</b> |        |    |
| <b>104</b> |        |    |
| <b>105</b> |        |    |
| <b>106</b> |        |    |
| <b>107</b> |        |    |
| <b>108</b> |        |    |
| <b>109</b> |        |    |
| <b>110</b> |        |    |
| <b>111</b> |        |    |
| <b>112</b> |        |    |
| <b>113</b> |        |    |
| <b>114</b> |        |    |
| <b>115</b> |        |    |
| <b>116</b> | q      | DF |
| <b>117</b> |        |    |
| <b>118</b> | 0.2888 | 75 |
| <b>119</b> | 0.5195 | 75 |
| <b>120</b> | 5.792  | 75 |

|            |          |    |
|------------|----------|----|
|            |          |    |
|            |          |    |
|            |          |    |
| <b>121</b> | 7.335    | 75 |
| <b>122</b> | 8.018    | 75 |
| <b>123</b> | 3.921    | 75 |
| <b>124</b> | 7.674    | 75 |
| <b>125</b> | 10.72    | 75 |
| <b>126</b> | 0.704    | 75 |
| <b>127</b> | 0.5195   | 75 |
| <b>128</b> | 1.138    | 75 |
| <b>129</b> | 0.006194 | 75 |
| <b>130</b> | 1.138    | 75 |
| <b>131</b> | 2.903    | 75 |
| <b>132</b> | 0.2307   | 75 |
| <b>133</b> | 6.081    | 75 |
| <b>134</b> | 7.624    | 75 |
| <b>135</b> | 8.307    | 75 |
| <b>136</b> | 4.21     | 75 |
| <b>137</b> | 7.962    | 75 |
| <b>138</b> | 11       | 75 |
| <b>139</b> | 0.4152   | 75 |
| <b>140</b> | 0.2307   | 75 |
| <b>141</b> | 1.427    | 75 |
| <b>142</b> | 0.2826   | 75 |
| <b>143</b> | 1.427    | 75 |
| <b>144</b> | 3.191    | 75 |
| <b>145</b> | 6.311    | 75 |
| <b>146</b> | 7.854    | 75 |
| <b>147</b> | 8.538    | 75 |
| <b>148</b> | 4.44     | 75 |
| <b>149</b> | 8.193    | 75 |
| <b>150</b> | 11.23    | 75 |

|            |        |    |
|------------|--------|----|
|            |        |    |
|            |        |    |
|            |        |    |
| <b>151</b> | 0.1845 | 75 |
| <b>152</b> | 0      | 75 |
| <b>153</b> | 1.658  | 75 |
| <b>154</b> | 0.5133 | 75 |
| <b>155</b> | 1.658  | 75 |
| <b>156</b> | 3.422  | 75 |
| <b>157</b> | 1.543  | 75 |
| <b>158</b> | 2.226  | 75 |
| <b>159</b> | 1.871  | 75 |
| <b>160</b> | 1.882  | 75 |
| <b>161</b> | 4.924  | 75 |
| <b>162</b> | 6.496  | 75 |
| <b>163</b> | 6.311  | 75 |
| <b>164</b> | 4.654  | 75 |
| <b>165</b> | 5.798  | 75 |
| <b>166</b> | 4.654  | 75 |
| <b>167</b> | 2.889  | 75 |
| <b>168</b> | 0.6832 | 75 |
| <b>169</b> | 3.414  | 75 |
| <b>170</b> | 0.3388 | 75 |
| <b>171</b> | 3.381  | 75 |
| <b>172</b> | 8.039  | 75 |
| <b>173</b> | 7.854  | 75 |
| <b>174</b> | 6.197  | 75 |
| <b>175</b> | 7.341  | 75 |
| <b>176</b> | 6.197  | 75 |
| <b>177</b> | 4.432  | 75 |
| <b>178</b> | 4.097  | 75 |
| <b>179</b> | 0.3444 | 75 |
| <b>180</b> | 2.697  | 75 |



|            |        |    |
|------------|--------|----|
|            |        |    |
|            |        |    |
|            |        |    |
| <b>181</b> | 8.722  | 75 |
| <b>182</b> | 8.538  | 75 |
| <b>183</b> | 6.88   | 75 |
| <b>184</b> | 8.024  | 75 |
| <b>185</b> | 6.88   | 75 |
| <b>186</b> | 5.115  | 75 |
| <b>187</b> | 3.753  | 75 |
| <b>188</b> | 6.794  | 75 |
| <b>189</b> | 4.625  | 75 |
| <b>190</b> | 4.44   | 75 |
| <b>191</b> | 2.783  | 75 |
| <b>192</b> | 3.927  | 75 |
| <b>193</b> | 2.783  | 75 |
| <b>194</b> | 1.018  | 75 |
| <b>195</b> | 3.042  | 75 |
| <b>196</b> | 8.378  | 75 |
| <b>197</b> | 8.193  | 75 |
| <b>198</b> | 6.535  | 75 |
| <b>199</b> | 7.68   | 75 |
| <b>200</b> | 6.535  | 75 |
| <b>201</b> | 4.771  | 75 |
| <b>202</b> | 11.42  | 75 |
| <b>203</b> | 11.23  | 75 |
| <b>204</b> | 9.577  | 75 |
| <b>205</b> | 10.72  | 75 |
| <b>206</b> | 9.577  | 75 |
| <b>207</b> | 7.813  | 75 |
| <b>208</b> | 0.1845 | 75 |
| <b>209</b> | 1.842  | 75 |
| <b>210</b> | 0.6978 | 75 |

|            |        |    |
|------------|--------|----|
|            |        |    |
|            |        |    |
|            |        |    |
| <b>211</b> | 1.842  | 75 |
| <b>212</b> | 3.607  | 75 |
| <b>213</b> | 1.658  | 75 |
| <b>214</b> | 0.5133 | 75 |
| <b>215</b> | 1.658  | 75 |
| <b>216</b> | 3.422  | 75 |
| <b>217</b> | 1.145  | 75 |
| <b>218</b> | 0      | 75 |
| <b>219</b> | 1.764  | 75 |
| <b>220</b> | 1.145  | 75 |
| <b>221</b> | 2.909  | 75 |
| <b>222</b> | 1.764  | 75 |

| 2way ANOVA<br>Tabular results |                          |                      |         |                 |                   |          |
|-------------------------------|--------------------------|----------------------|---------|-----------------|-------------------|----------|
| 1                             | Table Analyzed           | ST6GALNAC2           |         |                 |                   |          |
| 2                             |                          |                      |         |                 |                   |          |
| 3                             | Two-way ANOVA            | Ordinary             |         |                 |                   |          |
| 4                             | Alpha                    | 0.05                 |         |                 |                   |          |
| 5                             |                          |                      |         |                 |                   |          |
| 6                             | Source of Variation      | % of total variation | P value | P value summary | Significant?      |          |
| 7                             | Interaction              | 9.997                | 0.0006  | ***             | Yes               |          |
| 8                             | Time post-winter         | 56.05                | <0.0001 | ****            | Yes               |          |
| 9                             | Treatment                | 10.36                | <0.0001 | ****            | Yes               |          |
| 10                            |                          |                      |         |                 |                   |          |
| 11                            | ANOVA table              | SS                   | DF      | MS              | F (DFn, DFd)      | P value  |
| 12                            | Interaction              | 7.233                | 8       | 0.9041          | F (8, 75) = 3.972 | P=0.0006 |
| 13                            | Time post-winter         | 40.55                | 4       | 10.14           | F (4, 75) = 44.54 | P<0.0001 |
| 14                            | Treatment                | 7.494                | 2       | 3.747           | F (2, 75) = 16.46 | P<0.0001 |
| 15                            | Residual                 | 17.07                | 75      | 0.2276          |                   |          |
| 16                            |                          |                      |         |                 |                   |          |
| 17                            | Number of missing values | 0                    |         |                 |                   |          |

| 2way ANOVA<br>Multiple comparisons |                                                                                |            |                    |              |         |                  |
|------------------------------------|--------------------------------------------------------------------------------|------------|--------------------|--------------|---------|------------------|
| 1                                  | Compare cell means regardless of rows and columns                              |            |                    |              |         |                  |
| 2                                  |                                                                                |            |                    |              |         |                  |
| 3                                  | Number of families                                                             | 1          |                    |              |         |                  |
| 4                                  | Number of comparisons per family                                               | 105        |                    |              |         |                  |
| 5                                  | Alpha                                                                          | 0.05       |                    |              |         |                  |
| 6                                  |                                                                                |            |                    |              |         |                  |
| 7                                  | Tukey's multiple comparisons test                                              | Mean Diff. | 95.00% CI of diff. | Significant? | Summary | Adjusted P Value |
| 8                                  |                                                                                |            |                    |              |         |                  |
| 9                                  | End of winter:2 weeks of winter vs. End of winter:4 weeks of winter            | -0.08302   | -1.049 to 0.883    | No           | ns      | >0.9999          |
| 10                                 | End of winter:2 weeks of winter vs. End of winter:8 weeks of winter            | -0.03097   | -0.997 to 0.935    | No           | ns      | >0.9999          |
| 11                                 | End of winter:2 weeks of winter vs. 4 weeks post winter:2 weeks of winter      | -0.4552    | -1.421 to 0.5108   | No           | ns      | 0.9403           |
| 12                                 | End of winter:2 weeks of winter vs. 4 weeks post winter:4 weeks of winter      | -0.6661    | -1.632 to 0.2999   | No           | ns      | 0.5098           |
| 13                                 | End of winter:2 weeks of winter vs. 4 weeks post winter:8 weeks of winter      | -1.513     | -2.479 to -0.5471  | Yes          | ****    | <0.0001          |
| 14                                 | End of winter:2 weeks of winter vs. 8 weeks post winter:2 weeks of winter      | -0.7676    | -1.734 to 0.1984   | No           | ns      | 0.2767           |
| 15                                 | End of winter:2 weeks of winter vs. 8 weeks post winter:4 weeks of winter      | -2.253     | -3.219 to -1.287   | Yes          | ****    | <0.0001          |
| 16                                 | End of winter:2 weeks of winter vs. 8 weeks post winter:8 weeks of winter      | -2.438     | -3.404 to -1.472   | Yes          | ****    | <0.0001          |
| 17                                 | End of winter:2 weeks of winter vs. SPC -4 weeks post winter:2 weeks of winter | 0.09402    | -0.872 to 1.06     | No           | ns      | >0.9999          |
| 18                                 | End of winter:2 weeks of winter vs. SPC -4 weeks post winter:4 weeks of winter | -0.03097   | -0.997 to 0.935    | No           | ns      | >0.9999          |
| 19                                 | End of winter:2 weeks of winter vs. SPC -4 weeks post winter:8 weeks of winter | -0.2667    | -1.233 to 0.6993   | No           | ns      | 0.9997           |
| 20                                 | End of winter:2 weeks of winter vs. SPC -8 weeks post winter:2 weeks of winter | -0.1138    | -1.08 to 0.8522    | No           | ns      | >0.9999          |
| 21                                 | End of winter:2 weeks of winter vs. SPC -8 weeks post winter:4 weeks of winter | -0.2667    | -1.233 to 0.6993   | No           | ns      | 0.9997           |
| 22                                 | End of winter:2 weeks of winter vs. SPC -8 weeks post winter:8 weeks of winter | -0.5112    | -1.477 to 0.4548   | No           | ns      | 0.8665           |
| 23                                 | End of winter:4 weeks of winter vs. End of winter:8 weeks of winter            | 0.05205    | -0.9139 to 1.018   | No           | ns      | >0.9999          |
| 24                                 | End of winter:4 weeks of winter vs. 4 weeks post winter:2 weeks of winter      | -0.3722    | -1.338 to 0.5938   | No           | ns      | 0.9891           |
| 25                                 | End of winter:4 weeks of winter vs. 4 weeks post winter:4 weeks of winter      | -0.5831    | -1.549 to 0.3829   | No           | ns      | 0.7195           |
| 26                                 | End of winter:4 weeks of winter vs. 4 weeks post winter:8 weeks of winter      | -1.43      | -2.396 to -0.4641  | Yes          | ***     | 0.0002           |
| 27                                 | End of winter:4 weeks of winter vs. 8 weeks post winter:2 weeks of winter      | -0.6846    | -1.651 to 0.2814   | No           | ns      | 0.4632           |
| 28                                 | End of winter:4 weeks of winter vs. 8 weeks post winter:4 weeks of winter      | -2.17      | -3.136 to -1.204   | Yes          | ****    | <0.0001          |
| 29                                 | End of winter:4 weeks of winter vs. 8 weeks post winter:8 weeks of winter      | -2.355     | -3.321 to -1.389   | Yes          | ****    | <0.0001          |
| 30                                 | End of winter:4 weeks of winter vs. SPC -4 weeks post winter:2 weeks of winter | 0.177      | -0.789 to 1.143    | No           | ns      | >0.9999          |

| 2way ANOVA<br>Multiple comparisons |                                                                                      |          |                    |     |      |         |
|------------------------------------|--------------------------------------------------------------------------------------|----------|--------------------|-----|------|---------|
| 31                                 | End of winter:4 weeks of winter vs. SPC -4 weeks post winter:4 weeks of winter       | 0.05205  | -0.9139 to 1.018   | No  | ns   | >0.9999 |
| 32                                 | End of winter:4 weeks of winter vs. SPC -4 weeks post winter:8 weeks of winter       | -0.1837  | -1.15 to 0.7823    | No  | ns   | >0.9999 |
| 33                                 | End of winter:4 weeks of winter vs. SPC -8 weeks post winter:2 weeks of winter       | -0.03078 | -0.9968 to 0.9352  | No  | ns   | >0.9999 |
| 34                                 | End of winter:4 weeks of winter vs. SPC -8 weeks post winter:4 weeks of winter       | -0.1837  | -1.15 to 0.7823    | No  | ns   | >0.9999 |
| 35                                 | End of winter:4 weeks of winter vs. SPC -8 weeks post winter:8 weeks of winter       | -0.4282  | -1.394 to 0.5378   | No  | ns   | 0.9630  |
| 36                                 | End of winter:8 weeks of winter vs. 4 weeks post winter:2 weeks of winter            | -0.4243  | -1.39 to 0.5417    | No  | ns   | 0.9657  |
| 37                                 | End of winter:8 weeks of winter vs. 4 weeks post winter:4 weeks of winter            | -0.6352  | -1.601 to 0.3308   | No  | ns   | 0.5895  |
| 38                                 | End of winter:8 weeks of winter vs. 4 weeks post winter:8 weeks of winter            | -1.482   | -2.448 to -0.5161  | Yes | **** | <0.0001 |
| 39                                 | End of winter:8 weeks of winter vs. 8 weeks post winter:2 weeks of winter            | -0.7366  | -1.703 to 0.2294   | No  | ns   | 0.3406  |
| 40                                 | End of winter:8 weeks of winter vs. 8 weeks post winter:4 weeks of winter            | -2.222   | -3.188 to -1.256   | Yes | **** | <0.0001 |
| 41                                 | End of winter:8 weeks of winter vs. 8 weeks post winter:8 weeks of winter            | -2.407   | -3.373 to -1.441   | Yes | **** | <0.0001 |
| 42                                 | End of winter:8 weeks of winter vs. SPC -4 weeks post winter:2 weeks of winter       | 0.125    | -0.841 to 1.091    | No  | ns   | >0.9999 |
| 43                                 | End of winter:8 weeks of winter vs. SPC -4 weeks post winter:4 weeks of winter       | 0        | -0.966 to 0.966    | No  | ns   | >0.9999 |
| 44                                 | End of winter:8 weeks of winter vs. SPC -4 weeks post winter:8 weeks of winter       | -0.2357  | -1.202 to 0.7303   | No  | ns   | >0.9999 |
| 45                                 | End of winter:8 weeks of winter vs. SPC -8 weeks post winter:2 weeks of winter       | -0.08283 | -1.049 to 0.8832   | No  | ns   | >0.9999 |
| 46                                 | End of winter:8 weeks of winter vs. SPC -8 weeks post winter:4 weeks of winter       | -0.2357  | -1.202 to 0.7303   | No  | ns   | >0.9999 |
| 47                                 | End of winter:8 weeks of winter vs. SPC -8 weeks post winter:8 weeks of winter       | -0.4803  | -1.446 to 0.4857   | No  | ns   | 0.9120  |
| 48                                 | 4 weeks post winter:2 weeks of winter vs. 4 weeks post winter:4 weeks of winter      | -0.2109  | -1.177 to 0.7551   | No  | ns   | >0.9999 |
| 49                                 | 4 weeks post winter:2 weeks of winter vs. 4 weeks post winter:8 weeks of winter      | -1.058   | -2.024 to -0.09189 | Yes | *    | 0.0188  |
| 50                                 | 4 weeks post winter:2 weeks of winter vs. 8 weeks post winter:2 weeks of winter      | -0.3124  | -1.278 to 0.6536   | No  | ns   | 0.9981  |
| 51                                 | 4 weeks post winter:2 weeks of winter vs. 8 weeks post winter:4 weeks of winter      | -1.797   | -2.763 to -0.8314  | Yes | **** | <0.0001 |
| 52                                 | 4 weeks post winter:2 weeks of winter vs. 8 weeks post winter:8 weeks of winter      | -1.983   | -2.949 to -1.017   | Yes | **** | <0.0001 |
| 53                                 | 4 weeks post winter:2 weeks of winter vs. SPC -4 weeks post winter:2 weeks of winter | 0.5492   | -0.4167 to 1.515   | No  | ns   | 0.7952  |
| 54                                 | 4 weeks post winter:2 weeks of winter vs. SPC -4 weeks post winter:4 weeks of winter | 0.4243   | -0.5417 to 1.39    | No  | ns   | 0.9657  |
| 55                                 | 4 weeks post winter:2 weeks of winter vs. SPC -4 weeks post winter:8 weeks of winter | 0.1885   | -0.7775 to 1.155   | No  | ns   | >0.9999 |
| 56                                 | 4 weeks post winter:2 weeks of winter vs. SPC -8 weeks post winter:2 weeks of winter | 0.3414   | -0.6246 to 1.307   | No  | ns   | 0.9952  |
| 57                                 | 4 weeks post winter:2 weeks of winter vs. SPC -8 weeks post winter:4 weeks of winter | 0.1885   | -0.7775 to 1.155   | No  | ns   | >0.9999 |
| 58                                 | 4 weeks post winter:2 weeks of winter vs. SPC -8 weeks post winter:8 weeks of winter | -0.05601 | -1.022 to 0.91     | No  | ns   | >0.9999 |
| 59                                 | 4 weeks post winter:4 weeks of winter vs. 4 weeks post winter:8 weeks of winter      | -0.847   | -1.813 to 0.119    | No  | ns   | 0.1503  |
| 60                                 | 4 weeks post winter:4 weeks of winter vs. 8 weeks post winter:2 weeks of winter      | -0.1014  | -1.067 to 0.8645   | No  | ns   | >0.9999 |

| 2way ANOVA<br>Multiple comparisons |                                                                                      |         |                   |     |      |         |
|------------------------------------|--------------------------------------------------------------------------------------|---------|-------------------|-----|------|---------|
| 61                                 | 4 weeks post winter:4 weeks of winter vs. 8 weeks post winter:4 weeks of winter      | -1.586  | -2.552 to -0.6205 | Yes | **** | <0.0001 |
| 62                                 | 4 weeks post winter:4 weeks of winter vs. 8 weeks post winter:8 weeks of winter      | -1.772  | -2.738 to -0.8058 | Yes | **** | <0.0001 |
| 63                                 | 4 weeks post winter:4 weeks of winter vs. SPC -4 weeks post winter:2 weeks of winter | 0.7601  | -0.2058 to 1.726  | No  | ns   | 0.2913  |
| 64                                 | 4 weeks post winter:4 weeks of winter vs. SPC -4 weeks post winter:4 weeks of winter | 0.6352  | -0.3308 to 1.601  | No  | ns   | 0.5895  |
| 65                                 | 4 weeks post winter:4 weeks of winter vs. SPC -4 weeks post winter:8 weeks of winter | 0.3994  | -0.5666 to 1.365  | No  | ns   | 0.9794  |
| 66                                 | 4 weeks post winter:4 weeks of winter vs. SPC -8 weeks post winter:2 weeks of winter | 0.5523  | -0.4137 to 1.518  | No  | ns   | 0.7887  |
| 67                                 | 4 weeks post winter:4 weeks of winter vs. SPC -8 weeks post winter:4 weeks of winter | 0.3994  | -0.5666 to 1.365  | No  | ns   | 0.9794  |
| 68                                 | 4 weeks post winter:4 weeks of winter vs. SPC -8 weeks post winter:8 weeks of winter | 0.1549  | -0.8111 to 1.121  | No  | ns   | >0.9999 |
| 69                                 | 4 weeks post winter:8 weeks of winter vs. 8 weeks post winter:2 weeks of winter      | 0.7455  | -0.2205 to 1.712  | No  | ns   | 0.3214  |
| 70                                 | 4 weeks post winter:8 weeks of winter vs. 8 weeks post winter:4 weeks of winter      | -0.7395 | -1.705 to 0.2265  | No  | ns   | 0.3344  |
| 71                                 | 4 weeks post winter:8 weeks of winter vs. 8 weeks post winter:8 weeks of winter      | -0.9248 | -1.891 to 0.04117 | No  | ns   | 0.0748  |
| 72                                 | 4 weeks post winter:8 weeks of winter vs. SPC -4 weeks post winter:2 weeks of winter | 1.607   | 0.6411 to 2.573   | Yes | **** | <0.0001 |
| 73                                 | 4 weeks post winter:8 weeks of winter vs. SPC -4 weeks post winter:4 weeks of winter | 1.482   | 0.5161 to 2.448   | Yes | **** | <0.0001 |
| 74                                 | 4 weeks post winter:8 weeks of winter vs. SPC -4 weeks post winter:8 weeks of winter | 1.246   | 0.2804 to 2.212   | Yes | **   | 0.0019  |
| 75                                 | 4 weeks post winter:8 weeks of winter vs. SPC -8 weeks post winter:2 weeks of winter | 1.399   | 0.4333 to 2.365   | Yes | ***  | 0.0003  |
| 76                                 | 4 weeks post winter:8 weeks of winter vs. SPC -8 weeks post winter:4 weeks of winter | 1.246   | 0.2804 to 2.212   | Yes | **   | 0.0019  |
| 77                                 | 4 weeks post winter:8 weeks of winter vs. SPC -8 weeks post winter:8 weeks of winter | 1.002   | 0.03588 to 1.968  | Yes | *    | 0.0346  |
| 78                                 | 8 weeks post winter:2 weeks of winter vs. 8 weeks post winter:4 weeks of winter      | -1.485  | -2.451 to -0.519  | Yes | **** | <0.0001 |
| 79                                 | 8 weeks post winter:2 weeks of winter vs. 8 weeks post winter:8 weeks of winter      | -1.67   | -2.636 to -0.7044 | Yes | **** | <0.0001 |
| 80                                 | 8 weeks post winter:2 weeks of winter vs. SPC -4 weeks post winter:2 weeks of winter | 0.8616  | -0.1044 to 1.828  | No  | ns   | 0.1328  |
| 81                                 | 8 weeks post winter:2 weeks of winter vs. SPC -4 weeks post winter:4 weeks of winter | 0.7366  | -0.2294 to 1.703  | No  | ns   | 0.3406  |
| 82                                 | 8 weeks post winter:2 weeks of winter vs. SPC -4 weeks post winter:8 weeks of winter | 0.5009  | -0.4651 to 1.467  | No  | ns   | 0.8830  |
| 83                                 | 8 weeks post winter:2 weeks of winter vs. SPC -8 weeks post winter:2 weeks of winter | 0.6538  | -0.3122 to 1.62   | No  | ns   | 0.5415  |
| 84                                 | 8 weeks post winter:2 weeks of winter vs. SPC -8 weeks post winter:4 weeks of winter | 0.5009  | -0.4651 to 1.467  | No  | ns   | 0.8830  |
| 85                                 | 8 weeks post winter:2 weeks of winter vs. SPC -8 weeks post winter:8 weeks of winter | 0.2563  | -0.7096 to 1.222  | No  | ns   | 0.9998  |
| 86                                 | 8 weeks post winter:4 weeks of winter vs. 8 weeks post winter:8 weeks of winter      | -0.1854 | -1.151 to 0.7806  | No  | ns   | >0.9999 |
| 87                                 | 8 weeks post winter:4 weeks of winter vs. SPC -4 weeks post winter:2 weeks of winter | 2.347   | 1.381 to 3.313    | Yes | **** | <0.0001 |
| 88                                 | 8 weeks post winter:4 weeks of winter vs. SPC -4 weeks post winter:4 weeks of winter | 2.222   | 1.256 to 3.188    | Yes | **** | <0.0001 |
| 89                                 | 8 weeks post winter:4 weeks of winter vs. SPC -4 weeks post winter:8 weeks of winter | 1.986   | 1.02 to 2.952     | Yes | **** | <0.0001 |
| 90                                 | 8 weeks post winter:4 weeks of winter vs. SPC -8 weeks post winter:2 weeks of winter | 2.139   | 1.173 to 3.105    | Yes | **** | <0.0001 |

| 2way ANOVA<br>Multiple comparisons |                                                                                           |          |                  |            |             |         |
|------------------------------------|-------------------------------------------------------------------------------------------|----------|------------------|------------|-------------|---------|
| 91                                 | 8 weeks post winter:4 weeks of winter vs. SPC -8 weeks post winter:4 weeks of winter      | 1.986    | 1.02 to 2.952    | Yes        | ****        | <0.0001 |
| 92                                 | 8 weeks post winter:4 weeks of winter vs. SPC -8 weeks post winter:8 weeks of winter      | 1.741    | 0.7753 to 2.707  | Yes        | ****        | <0.0001 |
| 93                                 | 8 weeks post winter:8 weeks of winter vs. SPC -4 weeks post winter:2 weeks of winter      | 2.532    | 1.566 to 3.498   | Yes        | ****        | <0.0001 |
| 94                                 | 8 weeks post winter:8 weeks of winter vs. SPC -4 weeks post winter:4 weeks of winter      | 2.407    | 1.441 to 3.373   | Yes        | ****        | <0.0001 |
| 95                                 | 8 weeks post winter:8 weeks of winter vs. SPC -4 weeks post winter:8 weeks of winter      | 2.171    | 1.205 to 3.137   | Yes        | ****        | <0.0001 |
| 96                                 | 8 weeks post winter:8 weeks of winter vs. SPC -8 weeks post winter:2 weeks of winter      | 2.324    | 1.358 to 3.29    | Yes        | ****        | <0.0001 |
| 97                                 | 8 weeks post winter:8 weeks of winter vs. SPC -8 weeks post winter:4 weeks of winter      | 2.171    | 1.205 to 3.137   | Yes        | ****        | <0.0001 |
| 98                                 | 8 weeks post winter:8 weeks of winter vs. SPC -8 weeks post winter:8 weeks of winter      | 1.927    | 0.9607 to 2.893  | Yes        | ****        | <0.0001 |
| 99                                 | SPC -4 weeks post winter:2 weeks of winter vs. SPC -4 weeks post winter:4 weeks of winter | -0.125   | -1.091 to 0.841  | No         | ns          | >0.9999 |
| 100                                | SPC -4 weeks post winter:2 weeks of winter vs. SPC -4 weeks post winter:8 weeks of winter | -0.3607  | -1.327 to 0.6053 | No         | ns          | 0.9919  |
| 101                                | SPC -4 weeks post winter:2 weeks of winter vs. SPC -8 weeks post winter:2 weeks of winter | -0.2078  | -1.174 to 0.7582 | No         | ns          | >0.9999 |
| 102                                | SPC -4 weeks post winter:2 weeks of winter vs. SPC -8 weeks post winter:4 weeks of winter | -0.3607  | -1.327 to 0.6053 | No         | ns          | 0.9919  |
| 103                                | SPC -4 weeks post winter:2 weeks of winter vs. SPC -8 weeks post winter:8 weeks of winter | -0.6053  | -1.571 to 0.3607 | No         | ns          | 0.6656  |
| 104                                | SPC -4 weeks post winter:4 weeks of winter vs. SPC -4 weeks post winter:8 weeks of winter | -0.2357  | -1.202 to 0.7303 | No         | ns          | >0.9999 |
| 105                                | SPC -4 weeks post winter:4 weeks of winter vs. SPC -8 weeks post winter:2 weeks of winter | -0.08283 | -1.049 to 0.8832 | No         | ns          | >0.9999 |
| 106                                | SPC -4 weeks post winter:4 weeks of winter vs. SPC -8 weeks post winter:4 weeks of winter | -0.2357  | -1.202 to 0.7303 | No         | ns          | >0.9999 |
| 107                                | SPC -4 weeks post winter:4 weeks of winter vs. SPC -8 weeks post winter:8 weeks of winter | -0.4803  | -1.446 to 0.4857 | No         | ns          | 0.9120  |
| 108                                | SPC -4 weeks post winter:8 weeks of winter vs. SPC -8 weeks post winter:2 weeks of winter | 0.1529   | -0.8131 to 1.119 | No         | ns          | >0.9999 |
| 109                                | SPC -4 weeks post winter:8 weeks of winter vs. SPC -8 weeks post winter:4 weeks of winter | 0        | -0.966 to 0.966  | No         | ns          | >0.9999 |
| 110                                | SPC -4 weeks post winter:8 weeks of winter vs. SPC -8 weeks post winter:8 weeks of winter | -0.2445  | -1.211 to 0.7214 | No         | ns          | 0.9999  |
| 111                                | SPC -8 weeks post winter:2 weeks of winter vs. SPC -8 weeks post winter:4 weeks of winter | -0.1529  | -1.119 to 0.8131 | No         | ns          | >0.9999 |
| 112                                | SPC -8 weeks post winter:2 weeks of winter vs. SPC -8 weeks post winter:8 weeks of winter | -0.3974  | -1.363 to 0.5686 | No         | ns          | 0.9803  |
| 113                                | SPC -8 weeks post winter:4 weeks of winter vs. SPC -8 weeks post winter:8 weeks of winter | -0.2445  | -1.211 to 0.7214 | No         | ns          | 0.9999  |
| 114                                |                                                                                           |          |                  |            |             |         |
| 115                                |                                                                                           |          |                  |            |             |         |
| 116                                | Test details                                                                              | Mean 1   | Mean 2           | Mean Diff. | SE of diff. | N1      |
| 117                                |                                                                                           |          |                  |            |             |         |
| 118                                | End of winter:2 weeks of winter vs. End of winter:4 weeks of winter                       | 0.7202   | 0.8032           | -0.08302   | 0.2754      | 6       |
| 119                                | End of winter:2 weeks of winter vs. End of winter:8 weeks of winter                       | 0.7202   | 0.7511           | -0.03097   | 0.2754      | 6       |
| 120                                | End of winter:2 weeks of winter vs. 4 weeks post winter:2 weeks of winter                 | 0.7202   | 1.175            | -0.4552    | 0.2754      | 6       |

| 2way ANOVA<br>Multiple comparisons |                                                                                |        |        |          |        |   |
|------------------------------------|--------------------------------------------------------------------------------|--------|--------|----------|--------|---|
| <b>121</b>                         | End of winter:2 weeks of winter vs. 4 weeks post winter:4 weeks of winter      | 0.7202 | 1.386  | -0.6661  | 0.2754 | 6 |
| <b>122</b>                         | End of winter:2 weeks of winter vs. 4 weeks post winter:8 weeks of winter      | 0.7202 | 2.233  | -1.513   | 0.2754 | 6 |
| <b>123</b>                         | End of winter:2 weeks of winter vs. 8 weeks post winter:2 weeks of winter      | 0.7202 | 1.488  | -0.7676  | 0.2754 | 6 |
| <b>124</b>                         | End of winter:2 weeks of winter vs. 8 weeks post winter:4 weeks of winter      | 0.7202 | 2.973  | -2.253   | 0.2754 | 6 |
| <b>125</b>                         | End of winter:2 weeks of winter vs. 8 weeks post winter:8 weeks of winter      | 0.7202 | 3.158  | -2.438   | 0.2754 | 6 |
| <b>126</b>                         | End of winter:2 weeks of winter vs. SPC -4 weeks post winter:2 weeks of winter | 0.7202 | 0.6261 | 0.09402  | 0.2754 | 6 |
| <b>127</b>                         | End of winter:2 weeks of winter vs. SPC -4 weeks post winter:4 weeks of winter | 0.7202 | 0.7511 | -0.03097 | 0.2754 | 6 |
| <b>128</b>                         | End of winter:2 weeks of winter vs. SPC -4 weeks post winter:8 weeks of winter | 0.7202 | 0.9868 | -0.2667  | 0.2754 | 6 |
| <b>129</b>                         | End of winter:2 weeks of winter vs. SPC -8 weeks post winter:2 weeks of winter | 0.7202 | 0.834  | -0.1138  | 0.2754 | 6 |
| <b>130</b>                         | End of winter:2 weeks of winter vs. SPC -8 weeks post winter:4 weeks of winter | 0.7202 | 0.9868 | -0.2667  | 0.2754 | 6 |
| <b>131</b>                         | End of winter:2 weeks of winter vs. SPC -8 weeks post winter:8 weeks of winter | 0.7202 | 1.231  | -0.5112  | 0.2754 | 6 |
| <b>132</b>                         | End of winter:4 weeks of winter vs. End of winter:8 weeks of winter            | 0.8032 | 0.7511 | 0.05205  | 0.2754 | 6 |
| <b>133</b>                         | End of winter:4 weeks of winter vs. 4 weeks post winter:2 weeks of winter      | 0.8032 | 1.175  | -0.3722  | 0.2754 | 6 |
| <b>134</b>                         | End of winter:4 weeks of winter vs. 4 weeks post winter:4 weeks of winter      | 0.8032 | 1.386  | -0.5831  | 0.2754 | 6 |
| <b>135</b>                         | End of winter:4 weeks of winter vs. 4 weeks post winter:8 weeks of winter      | 0.8032 | 2.233  | -1.43    | 0.2754 | 6 |
| <b>136</b>                         | End of winter:4 weeks of winter vs. 8 weeks post winter:2 weeks of winter      | 0.8032 | 1.488  | -0.6846  | 0.2754 | 6 |
| <b>137</b>                         | End of winter:4 weeks of winter vs. 8 weeks post winter:4 weeks of winter      | 0.8032 | 2.973  | -2.17    | 0.2754 | 6 |
| <b>138</b>                         | End of winter:4 weeks of winter vs. 8 weeks post winter:8 weeks of winter      | 0.8032 | 3.158  | -2.355   | 0.2754 | 6 |
| <b>139</b>                         | End of winter:4 weeks of winter vs. SPC -4 weeks post winter:2 weeks of winter | 0.8032 | 0.6261 | 0.177    | 0.2754 | 6 |
| <b>140</b>                         | End of winter:4 weeks of winter vs. SPC -4 weeks post winter:4 weeks of winter | 0.8032 | 0.7511 | 0.05205  | 0.2754 | 6 |
| <b>141</b>                         | End of winter:4 weeks of winter vs. SPC -4 weeks post winter:8 weeks of winter | 0.8032 | 0.9868 | -0.1837  | 0.2754 | 6 |
| <b>142</b>                         | End of winter:4 weeks of winter vs. SPC -8 weeks post winter:2 weeks of winter | 0.8032 | 0.834  | -0.03078 | 0.2754 | 6 |
| <b>143</b>                         | End of winter:4 weeks of winter vs. SPC -8 weeks post winter:4 weeks of winter | 0.8032 | 0.9868 | -0.1837  | 0.2754 | 6 |
| <b>144</b>                         | End of winter:4 weeks of winter vs. SPC -8 weeks post winter:8 weeks of winter | 0.8032 | 1.231  | -0.4282  | 0.2754 | 6 |
| <b>145</b>                         | End of winter:8 weeks of winter vs. 4 weeks post winter:2 weeks of winter      | 0.7511 | 1.175  | -0.4243  | 0.2754 | 6 |
| <b>146</b>                         | End of winter:8 weeks of winter vs. 4 weeks post winter:4 weeks of winter      | 0.7511 | 1.386  | -0.6352  | 0.2754 | 6 |
| <b>147</b>                         | End of winter:8 weeks of winter vs. 4 weeks post winter:8 weeks of winter      | 0.7511 | 2.233  | -1.482   | 0.2754 | 6 |
| <b>148</b>                         | End of winter:8 weeks of winter vs. 8 weeks post winter:2 weeks of winter      | 0.7511 | 1.488  | -0.7366  | 0.2754 | 6 |
| <b>149</b>                         | End of winter:8 weeks of winter vs. 8 weeks post winter:4 weeks of winter      | 0.7511 | 2.973  | -2.222   | 0.2754 | 6 |
| <b>150</b>                         | End of winter:8 weeks of winter vs. 8 weeks post winter:8 weeks of winter      | 0.7511 | 3.158  | -2.407   | 0.2754 | 6 |



| 2way ANOVA<br>Multiple comparisons |                                                                                      |        |        |          |        |   |
|------------------------------------|--------------------------------------------------------------------------------------|--------|--------|----------|--------|---|
| <b>151</b>                         | End of winter:8 weeks of winter vs. SPC -4 weeks post winter:2 weeks of winter       | 0.7511 | 0.6261 | 0.125    | 0.2754 | 6 |
| <b>152</b>                         | End of winter:8 weeks of winter vs. SPC -4 weeks post winter:4 weeks of winter       | 0.7511 | 0.7511 | 0        | 0.2754 | 6 |
| <b>153</b>                         | End of winter:8 weeks of winter vs. SPC -4 weeks post winter:8 weeks of winter       | 0.7511 | 0.9868 | -0.2357  | 0.2754 | 6 |
| <b>154</b>                         | End of winter:8 weeks of winter vs. SPC -8 weeks post winter:2 weeks of winter       | 0.7511 | 0.834  | -0.08283 | 0.2754 | 6 |
| <b>155</b>                         | End of winter:8 weeks of winter vs. SPC -8 weeks post winter:4 weeks of winter       | 0.7511 | 0.9868 | -0.2357  | 0.2754 | 6 |
| <b>156</b>                         | End of winter:8 weeks of winter vs. SPC -8 weeks post winter:8 weeks of winter       | 0.7511 | 1.231  | -0.4803  | 0.2754 | 6 |
| <b>157</b>                         | 4 weeks post winter:2 weeks of winter vs. 4 weeks post winter:4 weeks of winter      | 1.175  | 1.386  | -0.2109  | 0.2754 | 6 |
| <b>158</b>                         | 4 weeks post winter:2 weeks of winter vs. 4 weeks post winter:8 weeks of winter      | 1.175  | 2.233  | -1.058   | 0.2754 | 6 |
| <b>159</b>                         | 4 weeks post winter:2 weeks of winter vs. 8 weeks post winter:2 weeks of winter      | 1.175  | 1.488  | -0.3124  | 0.2754 | 6 |
| <b>160</b>                         | 4 weeks post winter:2 weeks of winter vs. 8 weeks post winter:4 weeks of winter      | 1.175  | 2.973  | -1.797   | 0.2754 | 6 |
| <b>161</b>                         | 4 weeks post winter:2 weeks of winter vs. 8 weeks post winter:8 weeks of winter      | 1.175  | 3.158  | -1.983   | 0.2754 | 6 |
| <b>162</b>                         | 4 weeks post winter:2 weeks of winter vs. SPC -4 weeks post winter:2 weeks of winter | 1.175  | 0.6261 | 0.5492   | 0.2754 | 6 |
| <b>163</b>                         | 4 weeks post winter:2 weeks of winter vs. SPC -4 weeks post winter:4 weeks of winter | 1.175  | 0.7511 | 0.4243   | 0.2754 | 6 |
| <b>164</b>                         | 4 weeks post winter:2 weeks of winter vs. SPC -4 weeks post winter:8 weeks of winter | 1.175  | 0.9868 | 0.1885   | 0.2754 | 6 |
| <b>165</b>                         | 4 weeks post winter:2 weeks of winter vs. SPC -8 weeks post winter:2 weeks of winter | 1.175  | 0.834  | 0.3414   | 0.2754 | 6 |
| <b>166</b>                         | 4 weeks post winter:2 weeks of winter vs. SPC -8 weeks post winter:4 weeks of winter | 1.175  | 0.9868 | 0.1885   | 0.2754 | 6 |
| <b>167</b>                         | 4 weeks post winter:2 weeks of winter vs. SPC -8 weeks post winter:8 weeks of winter | 1.175  | 1.231  | -0.05601 | 0.2754 | 6 |
| <b>168</b>                         | 4 weeks post winter:4 weeks of winter vs. 4 weeks post winter:8 weeks of winter      | 1.386  | 2.233  | -0.847   | 0.2754 | 6 |
| <b>169</b>                         | 4 weeks post winter:4 weeks of winter vs. 8 weeks post winter:2 weeks of winter      | 1.386  | 1.488  | -0.1014  | 0.2754 | 6 |
| <b>170</b>                         | 4 weeks post winter:4 weeks of winter vs. 8 weeks post winter:4 weeks of winter      | 1.386  | 2.973  | -1.586   | 0.2754 | 6 |
| <b>171</b>                         | 4 weeks post winter:4 weeks of winter vs. 8 weeks post winter:8 weeks of winter      | 1.386  | 3.158  | -1.772   | 0.2754 | 6 |
| <b>172</b>                         | 4 weeks post winter:4 weeks of winter vs. SPC -4 weeks post winter:2 weeks of winter | 1.386  | 0.6261 | 0.7601   | 0.2754 | 6 |
| <b>173</b>                         | 4 weeks post winter:4 weeks of winter vs. SPC -4 weeks post winter:4 weeks of winter | 1.386  | 0.7511 | 0.6352   | 0.2754 | 6 |
| <b>174</b>                         | 4 weeks post winter:4 weeks of winter vs. SPC -4 weeks post winter:8 weeks of winter | 1.386  | 0.9868 | 0.3994   | 0.2754 | 6 |
| <b>175</b>                         | 4 weeks post winter:4 weeks of winter vs. SPC -8 weeks post winter:2 weeks of winter | 1.386  | 0.834  | 0.5523   | 0.2754 | 6 |
| <b>176</b>                         | 4 weeks post winter:4 weeks of winter vs. SPC -8 weeks post winter:4 weeks of winter | 1.386  | 0.9868 | 0.3994   | 0.2754 | 6 |
| <b>177</b>                         | 4 weeks post winter:4 weeks of winter vs. SPC -8 weeks post winter:8 weeks of winter | 1.386  | 1.231  | 0.1549   | 0.2754 | 6 |
| <b>178</b>                         | 4 weeks post winter:8 weeks of winter vs. 8 weeks post winter:2 weeks of winter      | 2.233  | 1.488  | 0.7455   | 0.2754 | 6 |
| <b>179</b>                         | 4 weeks post winter:8 weeks of winter vs. 8 weeks post winter:4 weeks of winter      | 2.233  | 2.973  | -0.7395  | 0.2754 | 6 |
| <b>180</b>                         | 4 weeks post winter:8 weeks of winter vs. 8 weeks post winter:8 weeks of winter      | 2.233  | 3.158  | -0.9248  | 0.2754 | 6 |

| 2way ANOVA<br>Multiple comparisons |                                                                                           |        |        |         |        |   |
|------------------------------------|-------------------------------------------------------------------------------------------|--------|--------|---------|--------|---|
| <b>181</b>                         | 4 weeks post winter:8 weeks of winter vs. SPC -4 weeks post winter:2 weeks of winter      | 2.233  | 0.6261 | 1.607   | 0.2754 | 6 |
| <b>182</b>                         | 4 weeks post winter:8 weeks of winter vs. SPC -4 weeks post winter:4 weeks of winter      | 2.233  | 0.7511 | 1.482   | 0.2754 | 6 |
| <b>183</b>                         | 4 weeks post winter:8 weeks of winter vs. SPC -4 weeks post winter:8 weeks of winter      | 2.233  | 0.9868 | 1.246   | 0.2754 | 6 |
| <b>184</b>                         | 4 weeks post winter:8 weeks of winter vs. SPC -8 weeks post winter:2 weeks of winter      | 2.233  | 0.834  | 1.399   | 0.2754 | 6 |
| <b>185</b>                         | 4 weeks post winter:8 weeks of winter vs. SPC -8 weeks post winter:4 weeks of winter      | 2.233  | 0.9868 | 1.246   | 0.2754 | 6 |
| <b>186</b>                         | 4 weeks post winter:8 weeks of winter vs. SPC -8 weeks post winter:8 weeks of winter      | 2.233  | 1.231  | 1.002   | 0.2754 | 6 |
| <b>187</b>                         | 8 weeks post winter:2 weeks of winter vs. 8 weeks post winter:4 weeks of winter           | 1.488  | 2.973  | -1.485  | 0.2754 | 6 |
| <b>188</b>                         | 8 weeks post winter:2 weeks of winter vs. 8 weeks post winter:8 weeks of winter           | 1.488  | 3.158  | -1.67   | 0.2754 | 6 |
| <b>189</b>                         | 8 weeks post winter:2 weeks of winter vs. SPC -4 weeks post winter:2 weeks of winter      | 1.488  | 0.6261 | 0.8616  | 0.2754 | 6 |
| <b>190</b>                         | 8 weeks post winter:2 weeks of winter vs. SPC -4 weeks post winter:4 weeks of winter      | 1.488  | 0.7511 | 0.7366  | 0.2754 | 6 |
| <b>191</b>                         | 8 weeks post winter:2 weeks of winter vs. SPC -4 weeks post winter:8 weeks of winter      | 1.488  | 0.9868 | 0.5009  | 0.2754 | 6 |
| <b>192</b>                         | 8 weeks post winter:2 weeks of winter vs. SPC -8 weeks post winter:2 weeks of winter      | 1.488  | 0.834  | 0.6538  | 0.2754 | 6 |
| <b>193</b>                         | 8 weeks post winter:2 weeks of winter vs. SPC -8 weeks post winter:4 weeks of winter      | 1.488  | 0.9868 | 0.5009  | 0.2754 | 6 |
| <b>194</b>                         | 8 weeks post winter:2 weeks of winter vs. SPC -8 weeks post winter:8 weeks of winter      | 1.488  | 1.231  | 0.2563  | 0.2754 | 6 |
| <b>195</b>                         | 8 weeks post winter:4 weeks of winter vs. 8 weeks post winter:8 weeks of winter           | 2.973  | 3.158  | -0.1854 | 0.2754 | 6 |
| <b>196</b>                         | 8 weeks post winter:4 weeks of winter vs. SPC -4 weeks post winter:2 weeks of winter      | 2.973  | 0.6261 | 2.347   | 0.2754 | 6 |
| <b>197</b>                         | 8 weeks post winter:4 weeks of winter vs. SPC -4 weeks post winter:4 weeks of winter      | 2.973  | 0.7511 | 2.222   | 0.2754 | 6 |
| <b>198</b>                         | 8 weeks post winter:4 weeks of winter vs. SPC -4 weeks post winter:8 weeks of winter      | 2.973  | 0.9868 | 1.986   | 0.2754 | 6 |
| <b>199</b>                         | 8 weeks post winter:4 weeks of winter vs. SPC -8 weeks post winter:2 weeks of winter      | 2.973  | 0.834  | 2.139   | 0.2754 | 6 |
| <b>200</b>                         | 8 weeks post winter:4 weeks of winter vs. SPC -8 weeks post winter:4 weeks of winter      | 2.973  | 0.9868 | 1.986   | 0.2754 | 6 |
| <b>201</b>                         | 8 weeks post winter:4 weeks of winter vs. SPC -8 weeks post winter:8 weeks of winter      | 2.973  | 1.231  | 1.741   | 0.2754 | 6 |
| <b>202</b>                         | 8 weeks post winter:8 weeks of winter vs. SPC -4 weeks post winter:2 weeks of winter      | 3.158  | 0.6261 | 2.532   | 0.2754 | 6 |
| <b>203</b>                         | 8 weeks post winter:8 weeks of winter vs. SPC -4 weeks post winter:4 weeks of winter      | 3.158  | 0.7511 | 2.407   | 0.2754 | 6 |
| <b>204</b>                         | 8 weeks post winter:8 weeks of winter vs. SPC -4 weeks post winter:8 weeks of winter      | 3.158  | 0.9868 | 2.171   | 0.2754 | 6 |
| <b>205</b>                         | 8 weeks post winter:8 weeks of winter vs. SPC -8 weeks post winter:2 weeks of winter      | 3.158  | 0.834  | 2.324   | 0.2754 | 6 |
| <b>206</b>                         | 8 weeks post winter:8 weeks of winter vs. SPC -8 weeks post winter:4 weeks of winter      | 3.158  | 0.9868 | 2.171   | 0.2754 | 6 |
| <b>207</b>                         | 8 weeks post winter:8 weeks of winter vs. SPC -8 weeks post winter:8 weeks of winter      | 3.158  | 1.231  | 1.927   | 0.2754 | 6 |
| <b>208</b>                         | SPC -4 weeks post winter:2 weeks of winter vs. SPC -4 weeks post winter:4 weeks of winter | 0.6261 | 0.7511 | -0.125  | 0.2754 | 6 |
| <b>209</b>                         | SPC -4 weeks post winter:2 weeks of winter vs. SPC -4 weeks post winter:8 weeks of winter | 0.6261 | 0.9868 | -0.3607 | 0.2754 | 6 |
| <b>210</b>                         | SPC -4 weeks post winter:2 weeks of winter vs. SPC -8 weeks post winter:2 weeks of winter | 0.6261 | 0.834  | -0.2078 | 0.2754 | 6 |

| <b>2way ANOVA</b><br>Multiple comparisons |                                                                                           |        |        |          |        |   |
|-------------------------------------------|-------------------------------------------------------------------------------------------|--------|--------|----------|--------|---|
| <b>211</b>                                | SPC -4 weeks post winter:2 weeks of winter vs. SPC -8 weeks post winter:4 weeks of winter | 0.6261 | 0.9868 | -0.3607  | 0.2754 | 6 |
| <b>212</b>                                | SPC -4 weeks post winter:2 weeks of winter vs. SPC -8 weeks post winter:8 weeks of winter | 0.6261 | 1.231  | -0.6053  | 0.2754 | 6 |
| <b>213</b>                                | SPC -4 weeks post winter:4 weeks of winter vs. SPC -4 weeks post winter:8 weeks of winter | 0.7511 | 0.9868 | -0.2357  | 0.2754 | 6 |
| <b>214</b>                                | SPC -4 weeks post winter:4 weeks of winter vs. SPC -8 weeks post winter:2 weeks of winter | 0.7511 | 0.834  | -0.08283 | 0.2754 | 6 |
| <b>215</b>                                | SPC -4 weeks post winter:4 weeks of winter vs. SPC -8 weeks post winter:4 weeks of winter | 0.7511 | 0.9868 | -0.2357  | 0.2754 | 6 |
| <b>216</b>                                | SPC -4 weeks post winter:4 weeks of winter vs. SPC -8 weeks post winter:8 weeks of winter | 0.7511 | 1.231  | -0.4803  | 0.2754 | 6 |
| <b>217</b>                                | SPC -4 weeks post winter:8 weeks of winter vs. SPC -8 weeks post winter:2 weeks of winter | 0.9868 | 0.834  | 0.1529   | 0.2754 | 6 |
| <b>218</b>                                | SPC -4 weeks post winter:8 weeks of winter vs. SPC -8 weeks post winter:4 weeks of winter | 0.9868 | 0.9868 | 0        | 0.2754 | 6 |
| <b>219</b>                                | SPC -4 weeks post winter:8 weeks of winter vs. SPC -8 weeks post winter:8 weeks of winter | 0.9868 | 1.231  | -0.2445  | 0.2754 | 6 |
| <b>220</b>                                | SPC -8 weeks post winter:2 weeks of winter vs. SPC -8 weeks post winter:4 weeks of winter | 0.834  | 0.9868 | -0.1529  | 0.2754 | 6 |
| <b>221</b>                                | SPC -8 weeks post winter:2 weeks of winter vs. SPC -8 weeks post winter:8 weeks of winter | 0.834  | 1.231  | -0.3974  | 0.2754 | 6 |
| <b>222</b>                                | SPC -8 weeks post winter:4 weeks of winter vs. SPC -8 weeks post winter:8 weeks of winter | 0.9868 | 1.231  | -0.2445  | 0.2754 | 6 |

|    |  |  |  |
|----|--|--|--|
|    |  |  |  |
|    |  |  |  |
|    |  |  |  |
| 1  |  |  |  |
| 2  |  |  |  |
| 3  |  |  |  |
| 4  |  |  |  |
| 5  |  |  |  |
| 6  |  |  |  |
| 7  |  |  |  |
| 8  |  |  |  |
| 9  |  |  |  |
| 10 |  |  |  |
| 11 |  |  |  |
| 12 |  |  |  |
| 13 |  |  |  |
| 14 |  |  |  |
| 15 |  |  |  |
| 16 |  |  |  |
| 17 |  |  |  |
| 18 |  |  |  |
| 19 |  |  |  |
| 20 |  |  |  |
| 21 |  |  |  |
| 22 |  |  |  |
| 23 |  |  |  |
| 24 |  |  |  |
| 25 |  |  |  |
| 26 |  |  |  |
| 27 |  |  |  |
| 28 |  |  |  |
| 29 |  |  |  |
| 30 |  |  |  |

|    |  |  |  |
|----|--|--|--|
|    |  |  |  |
|    |  |  |  |
|    |  |  |  |
| 31 |  |  |  |
| 32 |  |  |  |
| 33 |  |  |  |
| 34 |  |  |  |
| 35 |  |  |  |
| 36 |  |  |  |
| 37 |  |  |  |
| 38 |  |  |  |
| 39 |  |  |  |
| 40 |  |  |  |
| 41 |  |  |  |
| 42 |  |  |  |
| 43 |  |  |  |
| 44 |  |  |  |
| 45 |  |  |  |
| 46 |  |  |  |
| 47 |  |  |  |
| 48 |  |  |  |
| 49 |  |  |  |
| 50 |  |  |  |
| 51 |  |  |  |
| 52 |  |  |  |
| 53 |  |  |  |
| 54 |  |  |  |
| 55 |  |  |  |
| 56 |  |  |  |
| 57 |  |  |  |
| 58 |  |  |  |
| 59 |  |  |  |
| 60 |  |  |  |

|    |  |  |  |
|----|--|--|--|
|    |  |  |  |
|    |  |  |  |
|    |  |  |  |
| 61 |  |  |  |
| 62 |  |  |  |
| 63 |  |  |  |
| 64 |  |  |  |
| 65 |  |  |  |
| 66 |  |  |  |
| 67 |  |  |  |
| 68 |  |  |  |
| 69 |  |  |  |
| 70 |  |  |  |
| 71 |  |  |  |
| 72 |  |  |  |
| 73 |  |  |  |
| 74 |  |  |  |
| 75 |  |  |  |
| 76 |  |  |  |
| 77 |  |  |  |
| 78 |  |  |  |
| 79 |  |  |  |
| 80 |  |  |  |
| 81 |  |  |  |
| 82 |  |  |  |
| 83 |  |  |  |
| 84 |  |  |  |
| 85 |  |  |  |
| 86 |  |  |  |
| 87 |  |  |  |
| 88 |  |  |  |
| 89 |  |  |  |
| 90 |  |  |  |

|     |    |        |    |
|-----|----|--------|----|
|     |    |        |    |
|     |    |        |    |
|     |    |        |    |
| 91  |    |        |    |
| 92  |    |        |    |
| 93  |    |        |    |
| 94  |    |        |    |
| 95  |    |        |    |
| 96  |    |        |    |
| 97  |    |        |    |
| 98  |    |        |    |
| 99  |    |        |    |
| 100 |    |        |    |
| 101 |    |        |    |
| 102 |    |        |    |
| 103 |    |        |    |
| 104 |    |        |    |
| 105 |    |        |    |
| 106 |    |        |    |
| 107 |    |        |    |
| 108 |    |        |    |
| 109 |    |        |    |
| 110 |    |        |    |
| 111 |    |        |    |
| 112 |    |        |    |
| 113 |    |        |    |
| 114 |    |        |    |
| 115 |    |        |    |
| 116 | N2 | q      | DF |
| 117 |    |        |    |
| 118 | 6  | 0.4262 | 75 |
| 119 | 6  | 0.159  | 75 |
| 120 | 6  | 2.337  | 75 |

|            |   |        |    |
|------------|---|--------|----|
|            |   |        |    |
|            |   |        |    |
|            |   |        |    |
| <b>121</b> | 6 | 3.42   | 75 |
| <b>122</b> | 6 | 7.769  | 75 |
| <b>123</b> | 6 | 3.941  | 75 |
| <b>124</b> | 6 | 11.57  | 75 |
| <b>125</b> | 6 | 12.52  | 75 |
| <b>126</b> | 6 | 0.4827 | 75 |
| <b>127</b> | 6 | 0.159  | 75 |
| <b>128</b> | 6 | 1.369  | 75 |
| <b>129</b> | 6 | 0.5843 | 75 |
| <b>130</b> | 6 | 1.369  | 75 |
| <b>131</b> | 6 | 2.625  | 75 |
| <b>132</b> | 6 | 0.2672 | 75 |
| <b>133</b> | 6 | 1.911  | 75 |
| <b>134</b> | 6 | 2.994  | 75 |
| <b>135</b> | 6 | 7.342  | 75 |
| <b>136</b> | 6 | 3.515  | 75 |
| <b>137</b> | 6 | 11.14  | 75 |
| <b>138</b> | 6 | 12.09  | 75 |
| <b>139</b> | 6 | 0.909  | 75 |
| <b>140</b> | 6 | 0.2672 | 75 |
| <b>141</b> | 6 | 0.943  | 75 |
| <b>142</b> | 6 | 0.158  | 75 |
| <b>143</b> | 6 | 0.943  | 75 |
| <b>144</b> | 6 | 2.199  | 75 |
| <b>145</b> | 6 | 2.178  | 75 |
| <b>146</b> | 6 | 3.261  | 75 |
| <b>147</b> | 6 | 7.61   | 75 |
| <b>148</b> | 6 | 3.782  | 75 |
| <b>149</b> | 6 | 11.41  | 75 |
| <b>150</b> | 6 | 12.36  | 75 |



| <b>151</b> | 6 | 0.6417 | 75 |
|------------|---|--------|----|
| <b>152</b> | 6 | 0      | 75 |
| <b>153</b> | 6 | 1.21   | 75 |
| <b>154</b> | 6 | 0.4253 | 75 |
| <b>155</b> | 6 | 1.21   | 75 |
| <b>156</b> | 6 | 2.466  | 75 |
| <b>157</b> | 6 | 1.083  | 75 |
| <b>158</b> | 6 | 5.431  | 75 |
| <b>159</b> | 6 | 1.604  | 75 |
| <b>160</b> | 6 | 9.228  | 75 |
| <b>161</b> | 6 | 10.18  | 75 |
| <b>162</b> | 6 | 2.82   | 75 |
| <b>163</b> | 6 | 2.178  | 75 |
| <b>164</b> | 6 | 0.968  | 75 |
| <b>165</b> | 6 | 1.753  | 75 |
| <b>166</b> | 6 | 0.968  | 75 |
| <b>167</b> | 6 | 0.2876 | 75 |
| <b>168</b> | 6 | 4.349  | 75 |
| <b>169</b> | 6 | 0.5209 | 75 |
| <b>170</b> | 6 | 8.145  | 75 |
| <b>171</b> | 6 | 9.097  | 75 |
| <b>172</b> | 6 | 3.903  | 75 |
| <b>173</b> | 6 | 3.261  | 75 |
| <b>174</b> | 6 | 2.051  | 75 |
| <b>175</b> | 6 | 2.836  | 75 |
| <b>176</b> | 6 | 2.051  | 75 |
| <b>177</b> | 6 | 0.7953 | 75 |
| <b>178</b> | 6 | 3.828  | 75 |
| <b>179</b> | 6 | 3.797  | 75 |
| <b>180</b> | 6 | 4.748  | 75 |

|            |   |        |    |
|------------|---|--------|----|
|            |   |        |    |
|            |   |        |    |
|            |   |        |    |
| <b>181</b> | 6 | 8.251  | 75 |
| <b>182</b> | 6 | 7.61   | 75 |
| <b>183</b> | 6 | 6.399  | 75 |
| <b>184</b> | 6 | 7.184  | 75 |
| <b>185</b> | 6 | 6.399  | 75 |
| <b>186</b> | 6 | 5.144  | 75 |
| <b>187</b> | 6 | 7.624  | 75 |
| <b>188</b> | 6 | 8.576  | 75 |
| <b>189</b> | 6 | 4.424  | 75 |
| <b>190</b> | 6 | 3.782  | 75 |
| <b>191</b> | 6 | 2.572  | 75 |
| <b>192</b> | 6 | 3.357  | 75 |
| <b>193</b> | 6 | 2.572  | 75 |
| <b>194</b> | 6 | 1.316  | 75 |
| <b>195</b> | 6 | 0.9517 | 75 |
| <b>196</b> | 6 | 12.05  | 75 |
| <b>197</b> | 6 | 11.41  | 75 |
| <b>198</b> | 6 | 10.2   | 75 |
| <b>199</b> | 6 | 10.98  | 75 |
| <b>200</b> | 6 | 10.2   | 75 |
| <b>201</b> | 6 | 8.94   | 75 |
| <b>202</b> | 6 | 13     | 75 |
| <b>203</b> | 6 | 12.36  | 75 |
| <b>204</b> | 6 | 11.15  | 75 |
| <b>205</b> | 6 | 11.93  | 75 |
| <b>206</b> | 6 | 11.15  | 75 |
| <b>207</b> | 6 | 9.892  | 75 |
| <b>208</b> | 6 | 0.6417 | 75 |
| <b>209</b> | 6 | 1.852  | 75 |
| <b>210</b> | 6 | 1.067  | 75 |

|            |   |        |    |
|------------|---|--------|----|
|            |   |        |    |
|            |   |        |    |
|            |   |        |    |
| <b>211</b> | 6 | 1.852  | 75 |
| <b>212</b> | 6 | 3.108  | 75 |
| <b>213</b> | 6 | 1.21   | 75 |
| <b>214</b> | 6 | 0.4253 | 75 |
| <b>215</b> | 6 | 1.21   | 75 |
| <b>216</b> | 6 | 2.466  | 75 |
| <b>217</b> | 6 | 0.785  | 75 |
| <b>218</b> | 6 | 0      | 75 |
| <b>219</b> | 6 | 1.256  | 75 |
| <b>220</b> | 6 | 0.785  | 75 |
| <b>221</b> | 6 | 2.041  | 75 |
| <b>222</b> | 6 | 1.256  | 75 |

| 2way ANOVA<br>Tabular results |                          |                      |         |                 |                   |          |
|-------------------------------|--------------------------|----------------------|---------|-----------------|-------------------|----------|
| 1                             | Table Analyzed           | TPH                  |         |                 |                   |          |
| 2                             |                          |                      |         |                 |                   |          |
| 3                             | Two-way ANOVA            | Ordinary             |         |                 |                   |          |
| 4                             | Alpha                    | 0.05                 |         |                 |                   |          |
| 5                             |                          |                      |         |                 |                   |          |
| 6                             | Source of Variation      | % of total variation | P value | P value summary | Significant?      |          |
| 7                             | Interaction              | 30.55                | <0.0001 | ****            | Yes               |          |
| 8                             | Time post-winter         | 21.16                | <0.0001 | ****            | Yes               |          |
| 9                             | Treatment                | 11.8                 | <0.0001 | ****            | Yes               |          |
| 10                            |                          |                      |         |                 |                   |          |
| 11                            | ANOVA table              | SS                   | DF      | MS              | F (DFn, DFd)      | P value  |
| 12                            | Interaction              | 67.73                | 8       | 8.466           | F (8, 75) = 7.849 | P<0.0001 |
| 13                            | Time post-winter         | 46.91                | 4       | 11.73           | F (4, 75) = 10.87 | P<0.0001 |
| 14                            | Treatment                | 26.16                | 2       | 13.08           | F (2, 75) = 12.13 | P<0.0001 |
| 15                            | Residual                 | 80.89                | 75      | 1.079           |                   |          |
| 16                            |                          |                      |         |                 |                   |          |
| 17                            | Number of missing values | 0                    |         |                 |                   |          |

| 2way ANOVA<br>Multiple comparisons |                                                                                |            |                    |              |         |                  |
|------------------------------------|--------------------------------------------------------------------------------|------------|--------------------|--------------|---------|------------------|
| 1                                  | Compare cell means regardless of rows and columns                              |            |                    |              |         |                  |
| 2                                  |                                                                                |            |                    |              |         |                  |
| 3                                  | Number of families                                                             | 1          |                    |              |         |                  |
| 4                                  | Number of comparisons per family                                               | 105        |                    |              |         |                  |
| 5                                  | Alpha                                                                          | 0.05       |                    |              |         |                  |
| 6                                  |                                                                                |            |                    |              |         |                  |
| 7                                  | Tukey's multiple comparisons test                                              | Mean Diff. | 95.00% CI of diff. | Significant? | Summary | Adjusted P Value |
| 8                                  |                                                                                |            |                    |              |         |                  |
| 9                                  | End of winter:2 weeks of winter vs. End of winter:4 weeks of winter            | -0.06621   | -2.169 to 2.037    | No           | ns      | >0.9999          |
| 10                                 | End of winter:2 weeks of winter vs. End of winter:8 weeks of winter            | -0.3664    | -2.469 to 1.736    | No           | ns      | >0.9999          |
| 11                                 | End of winter:2 weeks of winter vs. 4 weeks post winter:2 weeks of winter      | -0.6253    | -2.728 to 1.477    | No           | ns      | 0.9992           |
| 12                                 | End of winter:2 weeks of winter vs. 4 weeks post winter:4 weeks of winter      | -0.5264    | -2.629 to 1.576    | No           | ns      | 0.9999           |
| 13                                 | End of winter:2 weeks of winter vs. 4 weeks post winter:8 weeks of winter      | -0.495     | -2.598 to 1.608    | No           | ns      | >0.9999          |
| 14                                 | End of winter:2 weeks of winter vs. 8 weeks post winter:2 weeks of winter      | -0.2547    | -2.358 to 1.848    | No           | ns      | >0.9999          |
| 15                                 | End of winter:2 weeks of winter vs. 8 weeks post winter:4 weeks of winter      | -0.8466    | -2.949 to 1.256    | No           | ns      | 0.9837           |
| 16                                 | End of winter:2 weeks of winter vs. 8 weeks post winter:8 weeks of winter      | -5.325     | -7.427 to -3.222   | Yes          | ****    | <0.0001          |
| 17                                 | End of winter:2 weeks of winter vs. SPC -4 weeks post winter:2 weeks of winter | -0.05656   | -2.159 to 2.046    | No           | ns      | >0.9999          |
| 18                                 | End of winter:2 weeks of winter vs. SPC -4 weeks post winter:4 weeks of winter | -0.3664    | -2.469 to 1.736    | No           | ns      | >0.9999          |
| 19                                 | End of winter:2 weeks of winter vs. SPC -4 weeks post winter:8 weeks of winter | -0.467     | -2.57 to 1.636     | No           | ns      | >0.9999          |
| 20                                 | End of winter:2 weeks of winter vs. SPC -8 weeks post winter:2 weeks of winter | -0.307     | -2.41 to 1.796     | No           | ns      | >0.9999          |
| 21                                 | End of winter:2 weeks of winter vs. SPC -8 weeks post winter:4 weeks of winter | -0.467     | -2.57 to 1.636     | No           | ns      | >0.9999          |
| 22                                 | End of winter:2 weeks of winter vs. SPC -8 weeks post winter:8 weeks of winter | -0.7541    | -2.857 to 1.349    | No           | ns      | 0.9945           |
| 23                                 | End of winter:4 weeks of winter vs. End of winter:8 weeks of winter            | -0.3002    | -2.403 to 1.803    | No           | ns      | >0.9999          |
| 24                                 | End of winter:4 weeks of winter vs. 4 weeks post winter:2 weeks of winter      | -0.5591    | -2.662 to 1.544    | No           | ns      | 0.9998           |
| 25                                 | End of winter:4 weeks of winter vs. 4 weeks post winter:4 weeks of winter      | -0.4601    | -2.563 to 1.643    | No           | ns      | >0.9999          |
| 26                                 | End of winter:4 weeks of winter vs. 4 weeks post winter:8 weeks of winter      | -0.4288    | -2.532 to 1.674    | No           | ns      | >0.9999          |
| 27                                 | End of winter:4 weeks of winter vs. 8 weeks post winter:2 weeks of winter      | -0.1885    | -2.291 to 1.914    | No           | ns      | >0.9999          |
| 28                                 | End of winter:4 weeks of winter vs. 8 weeks post winter:4 weeks of winter      | -0.7804    | -2.883 to 1.322    | No           | ns      | 0.9923           |
| 29                                 | End of winter:4 weeks of winter vs. 8 weeks post winter:8 weeks of winter      | -5.258     | -7.361 to -3.156   | Yes          | ****    | <0.0001          |
| 30                                 | End of winter:4 weeks of winter vs. SPC -4 weeks post winter:2 weeks of winter | 0.00965    | -2.093 to 2.112    | No           | ns      | >0.9999          |

| 2way ANOVA<br>Multiple comparisons |                                                                                      |         |                  |     |      |         |
|------------------------------------|--------------------------------------------------------------------------------------|---------|------------------|-----|------|---------|
| 31                                 | End of winter:4 weeks of winter vs. SPC -4 weeks post winter:4 weeks of winter       | -0.3002 | -2.403 to 1.803  | No  | ns   | >0.9999 |
| 32                                 | End of winter:4 weeks of winter vs. SPC -4 weeks post winter:8 weeks of winter       | -0.4008 | -2.504 to 1.702  | No  | ns   | >0.9999 |
| 33                                 | End of winter:4 weeks of winter vs. SPC -8 weeks post winter:2 weeks of winter       | -0.2408 | -2.344 to 1.862  | No  | ns   | >0.9999 |
| 34                                 | End of winter:4 weeks of winter vs. SPC -8 weeks post winter:4 weeks of winter       | -0.4008 | -2.504 to 1.702  | No  | ns   | >0.9999 |
| 35                                 | End of winter:4 weeks of winter vs. SPC -8 weeks post winter:8 weeks of winter       | -0.6879 | -2.791 to 1.415  | No  | ns   | 0.9978  |
| 36                                 | End of winter:8 weeks of winter vs. 4 weeks post winter:2 weeks of winter            | -0.2589 | -2.362 to 1.844  | No  | ns   | >0.9999 |
| 37                                 | End of winter:8 weeks of winter vs. 4 weeks post winter:4 weeks of winter            | -0.16   | -2.263 to 1.943  | No  | ns   | >0.9999 |
| 38                                 | End of winter:8 weeks of winter vs. 4 weeks post winter:8 weeks of winter            | -0.1286 | -2.231 to 1.974  | No  | ns   | >0.9999 |
| 39                                 | End of winter:8 weeks of winter vs. 8 weeks post winter:2 weeks of winter            | 0.1117  | -1.991 to 2.214  | No  | ns   | >0.9999 |
| 40                                 | End of winter:8 weeks of winter vs. 8 weeks post winter:4 weeks of winter            | -0.4802 | -2.583 to 1.623  | No  | ns   | >0.9999 |
| 41                                 | End of winter:8 weeks of winter vs. 8 weeks post winter:8 weeks of winter            | -4.958  | -7.061 to -2.855 | Yes | **** | <0.0001 |
| 42                                 | End of winter:8 weeks of winter vs. SPC -4 weeks post winter:2 weeks of winter       | 0.3098  | -1.793 to 2.413  | No  | ns   | >0.9999 |
| 43                                 | End of winter:8 weeks of winter vs. SPC -4 weeks post winter:4 weeks of winter       | 0       | -2.103 to 2.103  | No  | ns   | >0.9999 |
| 44                                 | End of winter:8 weeks of winter vs. SPC -4 weeks post winter:8 weeks of winter       | -0.1006 | -2.203 to 2.002  | No  | ns   | >0.9999 |
| 45                                 | End of winter:8 weeks of winter vs. SPC -8 weeks post winter:2 weeks of winter       | 0.05941 | -2.043 to 2.162  | No  | ns   | >0.9999 |
| 46                                 | End of winter:8 weeks of winter vs. SPC -8 weeks post winter:4 weeks of winter       | -0.1006 | -2.203 to 2.002  | No  | ns   | >0.9999 |
| 47                                 | End of winter:8 weeks of winter vs. SPC -8 weeks post winter:8 weeks of winter       | -0.3877 | -2.491 to 1.715  | No  | ns   | >0.9999 |
| 48                                 | 4 weeks post winter:2 weeks of winter vs. 4 weeks post winter:4 weeks of winter      | 0.09897 | -2.004 to 2.202  | No  | ns   | >0.9999 |
| 49                                 | 4 weeks post winter:2 weeks of winter vs. 4 weeks post winter:8 weeks of winter      | 0.1303  | -1.973 to 2.233  | No  | ns   | >0.9999 |
| 50                                 | 4 weeks post winter:2 weeks of winter vs. 8 weeks post winter:2 weeks of winter      | 0.3706  | -1.732 to 2.473  | No  | ns   | >0.9999 |
| 51                                 | 4 weeks post winter:2 weeks of winter vs. 8 weeks post winter:4 weeks of winter      | -0.2212 | -2.324 to 1.882  | No  | ns   | >0.9999 |
| 52                                 | 4 weeks post winter:2 weeks of winter vs. 8 weeks post winter:8 weeks of winter      | -4.699  | -6.802 to -2.596 | Yes | **** | <0.0001 |
| 53                                 | 4 weeks post winter:2 weeks of winter vs. SPC -4 weeks post winter:2 weeks of winter | 0.5688  | -1.534 to 2.672  | No  | ns   | 0.9997  |
| 54                                 | 4 weeks post winter:2 weeks of winter vs. SPC -4 weeks post winter:4 weeks of winter | 0.2589  | -1.844 to 2.362  | No  | ns   | >0.9999 |
| 55                                 | 4 weeks post winter:2 weeks of winter vs. SPC -4 weeks post winter:8 weeks of winter | 0.1583  | -1.945 to 2.261  | No  | ns   | >0.9999 |
| 56                                 | 4 weeks post winter:2 weeks of winter vs. SPC -8 weeks post winter:2 weeks of winter | 0.3184  | -1.784 to 2.421  | No  | ns   | >0.9999 |
| 57                                 | 4 weeks post winter:2 weeks of winter vs. SPC -8 weeks post winter:4 weeks of winter | 0.1583  | -1.945 to 2.261  | No  | ns   | >0.9999 |
| 58                                 | 4 weeks post winter:2 weeks of winter vs. SPC -8 weeks post winter:8 weeks of winter | -0.1287 | -2.232 to 1.974  | No  | ns   | >0.9999 |
| 59                                 | 4 weeks post winter:4 weeks of winter vs. 4 weeks post winter:8 weeks of winter      | 0.03135 | -2.071 to 2.134  | No  | ns   | >0.9999 |
| 60                                 | 4 weeks post winter:4 weeks of winter vs. 8 weeks post winter:2 weeks of winter      | 0.2716  | -1.831 to 2.374  | No  | ns   | >0.9999 |

| 2way ANOVA<br>Multiple comparisons |                                                                                      |          |                  |     |      |         |
|------------------------------------|--------------------------------------------------------------------------------------|----------|------------------|-----|------|---------|
| 61                                 | 4 weeks post winter:4 weeks of winter vs. 8 weeks post winter:4 weeks of winter      | -0.3202  | -2.423 to 1.783  | No  | ns   | >0.9999 |
| 62                                 | 4 weeks post winter:4 weeks of winter vs. 8 weeks post winter:8 weeks of winter      | -4.798   | -6.901 to -2.695 | Yes | **** | <0.0001 |
| 63                                 | 4 weeks post winter:4 weeks of winter vs. SPC -4 weeks post winter:2 weeks of winter | 0.4698   | -1.633 to 2.573  | No  | ns   | >0.9999 |
| 64                                 | 4 weeks post winter:4 weeks of winter vs. SPC -4 weeks post winter:4 weeks of winter | 0.16     | -1.943 to 2.263  | No  | ns   | >0.9999 |
| 65                                 | 4 weeks post winter:4 weeks of winter vs. SPC -4 weeks post winter:8 weeks of winter | 0.05934  | -2.043 to 2.162  | No  | ns   | >0.9999 |
| 66                                 | 4 weeks post winter:4 weeks of winter vs. SPC -8 weeks post winter:2 weeks of winter | 0.2194   | -1.883 to 2.322  | No  | ns   | >0.9999 |
| 67                                 | 4 weeks post winter:4 weeks of winter vs. SPC -8 weeks post winter:4 weeks of winter | 0.05934  | -2.043 to 2.162  | No  | ns   | >0.9999 |
| 68                                 | 4 weeks post winter:4 weeks of winter vs. SPC -8 weeks post winter:8 weeks of winter | -0.2277  | -2.331 to 1.875  | No  | ns   | >0.9999 |
| 69                                 | 4 weeks post winter:8 weeks of winter vs. 8 weeks post winter:2 weeks of winter      | 0.2403   | -1.863 to 2.343  | No  | ns   | >0.9999 |
| 70                                 | 4 weeks post winter:8 weeks of winter vs. 8 weeks post winter:4 weeks of winter      | -0.3516  | -2.454 to 1.751  | No  | ns   | >0.9999 |
| 71                                 | 4 weeks post winter:8 weeks of winter vs. 8 weeks post winter:8 weeks of winter      | -4.83    | -6.932 to -2.727 | Yes | **** | <0.0001 |
| 72                                 | 4 weeks post winter:8 weeks of winter vs. SPC -4 weeks post winter:2 weeks of winter | 0.4384   | -1.664 to 2.541  | No  | ns   | >0.9999 |
| 73                                 | 4 weeks post winter:8 weeks of winter vs. SPC -4 weeks post winter:4 weeks of winter | 0.1286   | -1.974 to 2.231  | No  | ns   | >0.9999 |
| 74                                 | 4 weeks post winter:8 weeks of winter vs. SPC -4 weeks post winter:8 weeks of winter | 0.02799  | -2.075 to 2.131  | No  | ns   | >0.9999 |
| 75                                 | 4 weeks post winter:8 weeks of winter vs. SPC -8 weeks post winter:2 weeks of winter | 0.188    | -1.915 to 2.291  | No  | ns   | >0.9999 |
| 76                                 | 4 weeks post winter:8 weeks of winter vs. SPC -8 weeks post winter:4 weeks of winter | 0.02799  | -2.075 to 2.131  | No  | ns   | >0.9999 |
| 77                                 | 4 weeks post winter:8 weeks of winter vs. SPC -8 weeks post winter:8 weeks of winter | -0.2591  | -2.362 to 1.844  | No  | ns   | >0.9999 |
| 78                                 | 8 weeks post winter:2 weeks of winter vs. 8 weeks post winter:4 weeks of winter      | -0.5919  | -2.695 to 1.511  | No  | ns   | 0.9996  |
| 79                                 | 8 weeks post winter:2 weeks of winter vs. 8 weeks post winter:8 weeks of winter      | -5.07    | -7.173 to -2.967 | Yes | **** | <0.0001 |
| 80                                 | 8 weeks post winter:2 weeks of winter vs. SPC -4 weeks post winter:2 weeks of winter | 0.1982   | -1.905 to 2.301  | No  | ns   | >0.9999 |
| 81                                 | 8 weeks post winter:2 weeks of winter vs. SPC -4 weeks post winter:4 weeks of winter | -0.1117  | -2.214 to 1.991  | No  | ns   | >0.9999 |
| 82                                 | 8 weeks post winter:2 weeks of winter vs. SPC -4 weeks post winter:8 weeks of winter | -0.2123  | -2.315 to 1.891  | No  | ns   | >0.9999 |
| 83                                 | 8 weeks post winter:2 weeks of winter vs. SPC -8 weeks post winter:2 weeks of winter | -0.05225 | -2.155 to 2.051  | No  | ns   | >0.9999 |
| 84                                 | 8 weeks post winter:2 weeks of winter vs. SPC -8 weeks post winter:4 weeks of winter | -0.2123  | -2.315 to 1.891  | No  | ns   | >0.9999 |
| 85                                 | 8 weeks post winter:2 weeks of winter vs. SPC -8 weeks post winter:8 weeks of winter | -0.4993  | -2.602 to 1.603  | No  | ns   | >0.9999 |
| 86                                 | 8 weeks post winter:4 weeks of winter vs. 8 weeks post winter:8 weeks of winter      | -4.478   | -6.581 to -2.375 | Yes | **** | <0.0001 |
| 87                                 | 8 weeks post winter:4 weeks of winter vs. SPC -4 weeks post winter:2 weeks of winter | 0.79     | -1.313 to 2.893  | No  | ns   | 0.9914  |
| 88                                 | 8 weeks post winter:4 weeks of winter vs. SPC -4 weeks post winter:4 weeks of winter | 0.4802   | -1.623 to 2.583  | No  | ns   | >0.9999 |
| 89                                 | 8 weeks post winter:4 weeks of winter vs. SPC -4 weeks post winter:8 weeks of winter | 0.3796   | -1.723 to 2.482  | No  | ns   | >0.9999 |
| 90                                 | 8 weeks post winter:4 weeks of winter vs. SPC -8 weeks post winter:2 weeks of winter | 0.5396   | -1.563 to 2.642  | No  | ns   | 0.9999  |

| 2way ANOVA<br>Multiple comparisons |                                                                                           |         |                 |            |             |         |
|------------------------------------|-------------------------------------------------------------------------------------------|---------|-----------------|------------|-------------|---------|
| 91                                 | 8 weeks post winter:4 weeks of winter vs. SPC -8 weeks post winter:4 weeks of winter      | 0.3796  | -1.723 to 2.482 | No         | ns          | >0.9999 |
| 92                                 | 8 weeks post winter:4 weeks of winter vs. SPC -8 weeks post winter:8 weeks of winter      | 0.09251 | -2.01 to 2.195  | No         | ns          | >0.9999 |
| 93                                 | 8 weeks post winter:8 weeks of winter vs. SPC -4 weeks post winter:2 weeks of winter      | 5.268   | 3.165 to 7.371  | Yes        | ****        | <0.0001 |
| 94                                 | 8 weeks post winter:8 weeks of winter vs. SPC -4 weeks post winter:4 weeks of winter      | 4.958   | 2.855 to 7.061  | Yes        | ****        | <0.0001 |
| 95                                 | 8 weeks post winter:8 weeks of winter vs. SPC -4 weeks post winter:8 weeks of winter      | 4.858   | 2.755 to 6.96   | Yes        | ****        | <0.0001 |
| 96                                 | 8 weeks post winter:8 weeks of winter vs. SPC -8 weeks post winter:2 weeks of winter      | 5.018   | 2.915 to 7.12   | Yes        | ****        | <0.0001 |
| 97                                 | 8 weeks post winter:8 weeks of winter vs. SPC -8 weeks post winter:4 weeks of winter      | 4.858   | 2.755 to 6.96   | Yes        | ****        | <0.0001 |
| 98                                 | 8 weeks post winter:8 weeks of winter vs. SPC -8 weeks post winter:8 weeks of winter      | 4.571   | 2.468 to 6.673  | Yes        | ****        | <0.0001 |
| 99                                 | SPC -4 weeks post winter:2 weeks of winter vs. SPC -4 weeks post winter:4 weeks of winter | -0.3098 | -2.413 to 1.793 | No         | ns          | >0.9999 |
| 100                                | SPC -4 weeks post winter:2 weeks of winter vs. SPC -4 weeks post winter:8 weeks of winter | -0.4105 | -2.513 to 1.692 | No         | ns          | >0.9999 |
| 101                                | SPC -4 weeks post winter:2 weeks of winter vs. SPC -8 weeks post winter:2 weeks of winter | -0.2504 | -2.353 to 1.852 | No         | ns          | >0.9999 |
| 102                                | SPC -4 weeks post winter:2 weeks of winter vs. SPC -8 weeks post winter:4 weeks of winter | -0.4105 | -2.513 to 1.692 | No         | ns          | >0.9999 |
| 103                                | SPC -4 weeks post winter:2 weeks of winter vs. SPC -8 weeks post winter:8 weeks of winter | -0.6975 | -2.8 to 1.405   | No         | ns          | 0.9975  |
| 104                                | SPC -4 weeks post winter:4 weeks of winter vs. SPC -4 weeks post winter:8 weeks of winter | -0.1006 | -2.203 to 2.002 | No         | ns          | >0.9999 |
| 105                                | SPC -4 weeks post winter:4 weeks of winter vs. SPC -8 weeks post winter:2 weeks of winter | 0.05941 | -2.043 to 2.162 | No         | ns          | >0.9999 |
| 106                                | SPC -4 weeks post winter:4 weeks of winter vs. SPC -8 weeks post winter:4 weeks of winter | -0.1006 | -2.203 to 2.002 | No         | ns          | >0.9999 |
| 107                                | SPC -4 weeks post winter:4 weeks of winter vs. SPC -8 weeks post winter:8 weeks of winter | -0.3877 | -2.491 to 1.715 | No         | ns          | >0.9999 |
| 108                                | SPC -4 weeks post winter:8 weeks of winter vs. SPC -8 weeks post winter:2 weeks of winter | 0.16    | -1.943 to 2.263 | No         | ns          | >0.9999 |
| 109                                | SPC -4 weeks post winter:8 weeks of winter vs. SPC -8 weeks post winter:4 weeks of winter | 0       | -2.103 to 2.103 | No         | ns          | >0.9999 |
| 110                                | SPC -4 weeks post winter:8 weeks of winter vs. SPC -8 weeks post winter:8 weeks of winter | -0.287  | -2.39 to 1.816  | No         | ns          | >0.9999 |
| 111                                | SPC -8 weeks post winter:2 weeks of winter vs. SPC -8 weeks post winter:4 weeks of winter | -0.16   | -2.263 to 1.943 | No         | ns          | >0.9999 |
| 112                                | SPC -8 weeks post winter:2 weeks of winter vs. SPC -8 weeks post winter:8 weeks of winter | -0.4471 | -2.55 to 1.656  | No         | ns          | >0.9999 |
| 113                                | SPC -8 weeks post winter:4 weeks of winter vs. SPC -8 weeks post winter:8 weeks of winter | -0.287  | -2.39 to 1.816  | No         | ns          | >0.9999 |
| 114                                |                                                                                           |         |                 |            |             |         |
| 115                                |                                                                                           |         |                 |            |             |         |
| 116                                | Test details                                                                              | Mean 1  | Mean 2          | Mean Diff. | SE of diff. | N1      |
| 117                                |                                                                                           |         |                 |            |             |         |
| 118                                | End of winter:2 weeks of winter vs. End of winter:4 weeks of winter                       | 0.7905  | 0.8567          | -0.06621   | 0.5996      | 6       |
| 119                                | End of winter:2 weeks of winter vs. End of winter:8 weeks of winter                       | 0.7905  | 1.157           | -0.3664    | 0.5996      | 6       |
| 120                                | End of winter:2 weeks of winter vs. 4 weeks post winter:2 weeks of winter                 | 0.7905  | 1.416           | -0.6253    | 0.5996      | 6       |



| 2way ANOVA<br>Multiple comparisons |                                                                                |        |        |          |        |   |
|------------------------------------|--------------------------------------------------------------------------------|--------|--------|----------|--------|---|
| 121                                | End of winter:2 weeks of winter vs. 4 weeks post winter:4 weeks of winter      | 0.7905 | 1.317  | -0.5264  | 0.5996 | 6 |
| 122                                | End of winter:2 weeks of winter vs. 4 weeks post winter:8 weeks of winter      | 0.7905 | 1.286  | -0.495   | 0.5996 | 6 |
| 123                                | End of winter:2 weeks of winter vs. 8 weeks post winter:2 weeks of winter      | 0.7905 | 1.045  | -0.2547  | 0.5996 | 6 |
| 124                                | End of winter:2 weeks of winter vs. 8 weeks post winter:4 weeks of winter      | 0.7905 | 1.637  | -0.8466  | 0.5996 | 6 |
| 125                                | End of winter:2 weeks of winter vs. 8 weeks post winter:8 weeks of winter      | 0.7905 | 6.115  | -5.325   | 0.5996 | 6 |
| 126                                | End of winter:2 weeks of winter vs. SPC -4 weeks post winter:2 weeks of winter | 0.7905 | 0.8471 | -0.05656 | 0.5996 | 6 |
| 127                                | End of winter:2 weeks of winter vs. SPC -4 weeks post winter:4 weeks of winter | 0.7905 | 1.157  | -0.3664  | 0.5996 | 6 |
| 128                                | End of winter:2 weeks of winter vs. SPC -4 weeks post winter:8 weeks of winter | 0.7905 | 1.258  | -0.467   | 0.5996 | 6 |
| 129                                | End of winter:2 weeks of winter vs. SPC -8 weeks post winter:2 weeks of winter | 0.7905 | 1.097  | -0.307   | 0.5996 | 6 |
| 130                                | End of winter:2 weeks of winter vs. SPC -8 weeks post winter:4 weeks of winter | 0.7905 | 1.258  | -0.467   | 0.5996 | 6 |
| 131                                | End of winter:2 weeks of winter vs. SPC -8 weeks post winter:8 weeks of winter | 0.7905 | 1.545  | -0.7541  | 0.5996 | 6 |
| 132                                | End of winter:4 weeks of winter vs. End of winter:8 weeks of winter            | 0.8567 | 1.157  | -0.3002  | 0.5996 | 6 |
| 133                                | End of winter:4 weeks of winter vs. 4 weeks post winter:2 weeks of winter      | 0.8567 | 1.416  | -0.5591  | 0.5996 | 6 |
| 134                                | End of winter:4 weeks of winter vs. 4 weeks post winter:4 weeks of winter      | 0.8567 | 1.317  | -0.4601  | 0.5996 | 6 |
| 135                                | End of winter:4 weeks of winter vs. 4 weeks post winter:8 weeks of winter      | 0.8567 | 1.286  | -0.4288  | 0.5996 | 6 |
| 136                                | End of winter:4 weeks of winter vs. 8 weeks post winter:2 weeks of winter      | 0.8567 | 1.045  | -0.1885  | 0.5996 | 6 |
| 137                                | End of winter:4 weeks of winter vs. 8 weeks post winter:4 weeks of winter      | 0.8567 | 1.637  | -0.7804  | 0.5996 | 6 |
| 138                                | End of winter:4 weeks of winter vs. 8 weeks post winter:8 weeks of winter      | 0.8567 | 6.115  | -5.258   | 0.5996 | 6 |
| 139                                | End of winter:4 weeks of winter vs. SPC -4 weeks post winter:2 weeks of winter | 0.8567 | 0.8471 | 0.00965  | 0.5996 | 6 |
| 140                                | End of winter:4 weeks of winter vs. SPC -4 weeks post winter:4 weeks of winter | 0.8567 | 1.157  | -0.3002  | 0.5996 | 6 |
| 141                                | End of winter:4 weeks of winter vs. SPC -4 weeks post winter:8 weeks of winter | 0.8567 | 1.258  | -0.4008  | 0.5996 | 6 |
| 142                                | End of winter:4 weeks of winter vs. SPC -8 weeks post winter:2 weeks of winter | 0.8567 | 1.097  | -0.2408  | 0.5996 | 6 |
| 143                                | End of winter:4 weeks of winter vs. SPC -8 weeks post winter:4 weeks of winter | 0.8567 | 1.258  | -0.4008  | 0.5996 | 6 |
| 144                                | End of winter:4 weeks of winter vs. SPC -8 weeks post winter:8 weeks of winter | 0.8567 | 1.545  | -0.6879  | 0.5996 | 6 |
| 145                                | End of winter:8 weeks of winter vs. 4 weeks post winter:2 weeks of winter      | 1.157  | 1.416  | -0.2589  | 0.5996 | 6 |
| 146                                | End of winter:8 weeks of winter vs. 4 weeks post winter:4 weeks of winter      | 1.157  | 1.317  | -0.16    | 0.5996 | 6 |
| 147                                | End of winter:8 weeks of winter vs. 4 weeks post winter:8 weeks of winter      | 1.157  | 1.286  | -0.1286  | 0.5996 | 6 |
| 148                                | End of winter:8 weeks of winter vs. 8 weeks post winter:2 weeks of winter      | 1.157  | 1.045  | 0.1117   | 0.5996 | 6 |
| 149                                | End of winter:8 weeks of winter vs. 8 weeks post winter:4 weeks of winter      | 1.157  | 1.637  | -0.4802  | 0.5996 | 6 |
| 150                                | End of winter:8 weeks of winter vs. 8 weeks post winter:8 weeks of winter      | 1.157  | 6.115  | -4.958   | 0.5996 | 6 |

| 2way ANOVA<br>Multiple comparisons |                                                                                      |       |        |         |        |   |
|------------------------------------|--------------------------------------------------------------------------------------|-------|--------|---------|--------|---|
| 151                                | End of winter:8 weeks of winter vs. SPC -4 weeks post winter:2 weeks of winter       | 1.157 | 0.8471 | 0.3098  | 0.5996 | 6 |
| 152                                | End of winter:8 weeks of winter vs. SPC -4 weeks post winter:4 weeks of winter       | 1.157 | 1.157  | 0       | 0.5996 | 6 |
| 153                                | End of winter:8 weeks of winter vs. SPC -4 weeks post winter:8 weeks of winter       | 1.157 | 1.258  | -0.1006 | 0.5996 | 6 |
| 154                                | End of winter:8 weeks of winter vs. SPC -8 weeks post winter:2 weeks of winter       | 1.157 | 1.097  | 0.05941 | 0.5996 | 6 |
| 155                                | End of winter:8 weeks of winter vs. SPC -8 weeks post winter:4 weeks of winter       | 1.157 | 1.258  | -0.1006 | 0.5996 | 6 |
| 156                                | End of winter:8 weeks of winter vs. SPC -8 weeks post winter:8 weeks of winter       | 1.157 | 1.545  | -0.3877 | 0.5996 | 6 |
| 157                                | 4 weeks post winter:2 weeks of winter vs. 4 weeks post winter:4 weeks of winter      | 1.416 | 1.317  | 0.09897 | 0.5996 | 6 |
| 158                                | 4 weeks post winter:2 weeks of winter vs. 4 weeks post winter:8 weeks of winter      | 1.416 | 1.286  | 0.1303  | 0.5996 | 6 |
| 159                                | 4 weeks post winter:2 weeks of winter vs. 8 weeks post winter:2 weeks of winter      | 1.416 | 1.045  | 0.3706  | 0.5996 | 6 |
| 160                                | 4 weeks post winter:2 weeks of winter vs. 8 weeks post winter:4 weeks of winter      | 1.416 | 1.637  | -0.2212 | 0.5996 | 6 |
| 161                                | 4 weeks post winter:2 weeks of winter vs. 8 weeks post winter:8 weeks of winter      | 1.416 | 6.115  | -4.699  | 0.5996 | 6 |
| 162                                | 4 weeks post winter:2 weeks of winter vs. SPC -4 weeks post winter:2 weeks of winter | 1.416 | 0.8471 | 0.5688  | 0.5996 | 6 |
| 163                                | 4 weeks post winter:2 weeks of winter vs. SPC -4 weeks post winter:4 weeks of winter | 1.416 | 1.157  | 0.2589  | 0.5996 | 6 |
| 164                                | 4 weeks post winter:2 weeks of winter vs. SPC -4 weeks post winter:8 weeks of winter | 1.416 | 1.258  | 0.1583  | 0.5996 | 6 |
| 165                                | 4 weeks post winter:2 weeks of winter vs. SPC -8 weeks post winter:2 weeks of winter | 1.416 | 1.097  | 0.3184  | 0.5996 | 6 |
| 166                                | 4 weeks post winter:2 weeks of winter vs. SPC -8 weeks post winter:4 weeks of winter | 1.416 | 1.258  | 0.1583  | 0.5996 | 6 |
| 167                                | 4 weeks post winter:2 weeks of winter vs. SPC -8 weeks post winter:8 weeks of winter | 1.416 | 1.545  | -0.1287 | 0.5996 | 6 |
| 168                                | 4 weeks post winter:4 weeks of winter vs. 4 weeks post winter:8 weeks of winter      | 1.317 | 1.286  | 0.03135 | 0.5996 | 6 |
| 169                                | 4 weeks post winter:4 weeks of winter vs. 8 weeks post winter:2 weeks of winter      | 1.317 | 1.045  | 0.2716  | 0.5996 | 6 |
| 170                                | 4 weeks post winter:4 weeks of winter vs. 8 weeks post winter:4 weeks of winter      | 1.317 | 1.637  | -0.3202 | 0.5996 | 6 |
| 171                                | 4 weeks post winter:4 weeks of winter vs. 8 weeks post winter:8 weeks of winter      | 1.317 | 6.115  | -4.798  | 0.5996 | 6 |
| 172                                | 4 weeks post winter:4 weeks of winter vs. SPC -4 weeks post winter:2 weeks of winter | 1.317 | 0.8471 | 0.4698  | 0.5996 | 6 |
| 173                                | 4 weeks post winter:4 weeks of winter vs. SPC -4 weeks post winter:4 weeks of winter | 1.317 | 1.157  | 0.16    | 0.5996 | 6 |
| 174                                | 4 weeks post winter:4 weeks of winter vs. SPC -4 weeks post winter:8 weeks of winter | 1.317 | 1.258  | 0.05934 | 0.5996 | 6 |
| 175                                | 4 weeks post winter:4 weeks of winter vs. SPC -8 weeks post winter:2 weeks of winter | 1.317 | 1.097  | 0.2194  | 0.5996 | 6 |
| 176                                | 4 weeks post winter:4 weeks of winter vs. SPC -8 weeks post winter:4 weeks of winter | 1.317 | 1.258  | 0.05934 | 0.5996 | 6 |
| 177                                | 4 weeks post winter:4 weeks of winter vs. SPC -8 weeks post winter:8 weeks of winter | 1.317 | 1.545  | -0.2277 | 0.5996 | 6 |
| 178                                | 4 weeks post winter:8 weeks of winter vs. 8 weeks post winter:2 weeks of winter      | 1.286 | 1.045  | 0.2403  | 0.5996 | 6 |
| 179                                | 4 weeks post winter:8 weeks of winter vs. 8 weeks post winter:4 weeks of winter      | 1.286 | 1.637  | -0.3516 | 0.5996 | 6 |
| 180                                | 4 weeks post winter:8 weeks of winter vs. 8 weeks post winter:8 weeks of winter      | 1.286 | 6.115  | -4.83   | 0.5996 | 6 |

| 2way ANOVA<br>Multiple comparisons |                                                                                           |        |        |          |        |   |
|------------------------------------|-------------------------------------------------------------------------------------------|--------|--------|----------|--------|---|
| 181                                | 4 weeks post winter:8 weeks of winter vs. SPC -4 weeks post winter:2 weeks of winter      | 1.286  | 0.8471 | 0.4384   | 0.5996 | 6 |
| 182                                | 4 weeks post winter:8 weeks of winter vs. SPC -4 weeks post winter:4 weeks of winter      | 1.286  | 1.157  | 0.1286   | 0.5996 | 6 |
| 183                                | 4 weeks post winter:8 weeks of winter vs. SPC -4 weeks post winter:8 weeks of winter      | 1.286  | 1.258  | 0.02799  | 0.5996 | 6 |
| 184                                | 4 weeks post winter:8 weeks of winter vs. SPC -8 weeks post winter:2 weeks of winter      | 1.286  | 1.097  | 0.188    | 0.5996 | 6 |
| 185                                | 4 weeks post winter:8 weeks of winter vs. SPC -8 weeks post winter:4 weeks of winter      | 1.286  | 1.258  | 0.02799  | 0.5996 | 6 |
| 186                                | 4 weeks post winter:8 weeks of winter vs. SPC -8 weeks post winter:8 weeks of winter      | 1.286  | 1.545  | -0.2591  | 0.5996 | 6 |
| 187                                | 8 weeks post winter:2 weeks of winter vs. 8 weeks post winter:4 weeks of winter           | 1.045  | 1.637  | -0.5919  | 0.5996 | 6 |
| 188                                | 8 weeks post winter:2 weeks of winter vs. 8 weeks post winter:8 weeks of winter           | 1.045  | 6.115  | -5.07    | 0.5996 | 6 |
| 189                                | 8 weeks post winter:2 weeks of winter vs. SPC -4 weeks post winter:2 weeks of winter      | 1.045  | 0.8471 | 0.1982   | 0.5996 | 6 |
| 190                                | 8 weeks post winter:2 weeks of winter vs. SPC -4 weeks post winter:4 weeks of winter      | 1.045  | 1.157  | -0.1117  | 0.5996 | 6 |
| 191                                | 8 weeks post winter:2 weeks of winter vs. SPC -4 weeks post winter:8 weeks of winter      | 1.045  | 1.258  | -0.2123  | 0.5996 | 6 |
| 192                                | 8 weeks post winter:2 weeks of winter vs. SPC -8 weeks post winter:2 weeks of winter      | 1.045  | 1.097  | -0.05225 | 0.5996 | 6 |
| 193                                | 8 weeks post winter:2 weeks of winter vs. SPC -8 weeks post winter:4 weeks of winter      | 1.045  | 1.258  | -0.2123  | 0.5996 | 6 |
| 194                                | 8 weeks post winter:2 weeks of winter vs. SPC -8 weeks post winter:8 weeks of winter      | 1.045  | 1.545  | -0.4993  | 0.5996 | 6 |
| 195                                | 8 weeks post winter:4 weeks of winter vs. 8 weeks post winter:8 weeks of winter           | 1.637  | 6.115  | -4.478   | 0.5996 | 6 |
| 196                                | 8 weeks post winter:4 weeks of winter vs. SPC -4 weeks post winter:2 weeks of winter      | 1.637  | 0.8471 | 0.79     | 0.5996 | 6 |
| 197                                | 8 weeks post winter:4 weeks of winter vs. SPC -4 weeks post winter:4 weeks of winter      | 1.637  | 1.157  | 0.4802   | 0.5996 | 6 |
| 198                                | 8 weeks post winter:4 weeks of winter vs. SPC -4 weeks post winter:8 weeks of winter      | 1.637  | 1.258  | 0.3796   | 0.5996 | 6 |
| 199                                | 8 weeks post winter:4 weeks of winter vs. SPC -8 weeks post winter:2 weeks of winter      | 1.637  | 1.097  | 0.5396   | 0.5996 | 6 |
| 200                                | 8 weeks post winter:4 weeks of winter vs. SPC -8 weeks post winter:4 weeks of winter      | 1.637  | 1.258  | 0.3796   | 0.5996 | 6 |
| 201                                | 8 weeks post winter:4 weeks of winter vs. SPC -8 weeks post winter:8 weeks of winter      | 1.637  | 1.545  | 0.09251  | 0.5996 | 6 |
| 202                                | 8 weeks post winter:8 weeks of winter vs. SPC -4 weeks post winter:2 weeks of winter      | 6.115  | 0.8471 | 5.268    | 0.5996 | 6 |
| 203                                | 8 weeks post winter:8 weeks of winter vs. SPC -4 weeks post winter:4 weeks of winter      | 6.115  | 1.157  | 4.958    | 0.5996 | 6 |
| 204                                | 8 weeks post winter:8 weeks of winter vs. SPC -4 weeks post winter:8 weeks of winter      | 6.115  | 1.258  | 4.858    | 0.5996 | 6 |
| 205                                | 8 weeks post winter:8 weeks of winter vs. SPC -8 weeks post winter:2 weeks of winter      | 6.115  | 1.097  | 5.018    | 0.5996 | 6 |
| 206                                | 8 weeks post winter:8 weeks of winter vs. SPC -8 weeks post winter:4 weeks of winter      | 6.115  | 1.258  | 4.858    | 0.5996 | 6 |
| 207                                | 8 weeks post winter:8 weeks of winter vs. SPC -8 weeks post winter:8 weeks of winter      | 6.115  | 1.545  | 4.571    | 0.5996 | 6 |
| 208                                | SPC -4 weeks post winter:2 weeks of winter vs. SPC -4 weeks post winter:4 weeks of winter | 0.8471 | 1.157  | -0.3098  | 0.5996 | 6 |
| 209                                | SPC -4 weeks post winter:2 weeks of winter vs. SPC -4 weeks post winter:8 weeks of winter | 0.8471 | 1.258  | -0.4105  | 0.5996 | 6 |
| 210                                | SPC -4 weeks post winter:2 weeks of winter vs. SPC -8 weeks post winter:2 weeks of winter | 0.8471 | 1.097  | -0.2504  | 0.5996 | 6 |

| <b>2way ANOVA</b><br>Multiple comparisons |                                                                                           |        |       |         |        |   |
|-------------------------------------------|-------------------------------------------------------------------------------------------|--------|-------|---------|--------|---|
| <b>211</b>                                | SPC -4 weeks post winter:2 weeks of winter vs. SPC -8 weeks post winter:4 weeks of winter | 0.8471 | 1.258 | -0.4105 | 0.5996 | 6 |
| <b>212</b>                                | SPC -4 weeks post winter:2 weeks of winter vs. SPC -8 weeks post winter:8 weeks of winter | 0.8471 | 1.545 | -0.6975 | 0.5996 | 6 |
| <b>213</b>                                | SPC -4 weeks post winter:4 weeks of winter vs. SPC -4 weeks post winter:8 weeks of winter | 1.157  | 1.258 | -0.1006 | 0.5996 | 6 |
| <b>214</b>                                | SPC -4 weeks post winter:4 weeks of winter vs. SPC -8 weeks post winter:2 weeks of winter | 1.157  | 1.097 | 0.05941 | 0.5996 | 6 |
| <b>215</b>                                | SPC -4 weeks post winter:4 weeks of winter vs. SPC -8 weeks post winter:4 weeks of winter | 1.157  | 1.258 | -0.1006 | 0.5996 | 6 |
| <b>216</b>                                | SPC -4 weeks post winter:4 weeks of winter vs. SPC -8 weeks post winter:8 weeks of winter | 1.157  | 1.545 | -0.3877 | 0.5996 | 6 |
| <b>217</b>                                | SPC -4 weeks post winter:8 weeks of winter vs. SPC -8 weeks post winter:2 weeks of winter | 1.258  | 1.097 | 0.16    | 0.5996 | 6 |
| <b>218</b>                                | SPC -4 weeks post winter:8 weeks of winter vs. SPC -8 weeks post winter:4 weeks of winter | 1.258  | 1.258 | 0       | 0.5996 | 6 |
| <b>219</b>                                | SPC -4 weeks post winter:8 weeks of winter vs. SPC -8 weeks post winter:8 weeks of winter | 1.258  | 1.545 | -0.287  | 0.5996 | 6 |
| <b>220</b>                                | SPC -8 weeks post winter:2 weeks of winter vs. SPC -8 weeks post winter:4 weeks of winter | 1.097  | 1.258 | -0.16   | 0.5996 | 6 |
| <b>221</b>                                | SPC -8 weeks post winter:2 weeks of winter vs. SPC -8 weeks post winter:8 weeks of winter | 1.097  | 1.545 | -0.4471 | 0.5996 | 6 |
| <b>222</b>                                | SPC -8 weeks post winter:4 weeks of winter vs. SPC -8 weeks post winter:8 weeks of winter | 1.258  | 1.545 | -0.287  | 0.5996 | 6 |

| 1  |  |  |  |
|----|--|--|--|
| 2  |  |  |  |
| 3  |  |  |  |
| 4  |  |  |  |
| 5  |  |  |  |
| 6  |  |  |  |
| 7  |  |  |  |
| 8  |  |  |  |
| 9  |  |  |  |
| 10 |  |  |  |
| 11 |  |  |  |
| 12 |  |  |  |
| 13 |  |  |  |
| 14 |  |  |  |
| 15 |  |  |  |
| 16 |  |  |  |
| 17 |  |  |  |
| 18 |  |  |  |
| 19 |  |  |  |
| 20 |  |  |  |
| 21 |  |  |  |
| 22 |  |  |  |
| 23 |  |  |  |
| 24 |  |  |  |
| 25 |  |  |  |
| 26 |  |  |  |
| 27 |  |  |  |
| 28 |  |  |  |
| 29 |  |  |  |
| 30 |  |  |  |

|    |  |  |  |
|----|--|--|--|
|    |  |  |  |
|    |  |  |  |
|    |  |  |  |
| 31 |  |  |  |
| 32 |  |  |  |
| 33 |  |  |  |
| 34 |  |  |  |
| 35 |  |  |  |
| 36 |  |  |  |
| 37 |  |  |  |
| 38 |  |  |  |
| 39 |  |  |  |
| 40 |  |  |  |
| 41 |  |  |  |
| 42 |  |  |  |
| 43 |  |  |  |
| 44 |  |  |  |
| 45 |  |  |  |
| 46 |  |  |  |
| 47 |  |  |  |
| 48 |  |  |  |
| 49 |  |  |  |
| 50 |  |  |  |
| 51 |  |  |  |
| 52 |  |  |  |
| 53 |  |  |  |
| 54 |  |  |  |
| 55 |  |  |  |
| 56 |  |  |  |
| 57 |  |  |  |
| 58 |  |  |  |
| 59 |  |  |  |
| 60 |  |  |  |

|    |  |  |  |
|----|--|--|--|
|    |  |  |  |
|    |  |  |  |
|    |  |  |  |
| 61 |  |  |  |
| 62 |  |  |  |
| 63 |  |  |  |
| 64 |  |  |  |
| 65 |  |  |  |
| 66 |  |  |  |
| 67 |  |  |  |
| 68 |  |  |  |
| 69 |  |  |  |
| 70 |  |  |  |
| 71 |  |  |  |
| 72 |  |  |  |
| 73 |  |  |  |
| 74 |  |  |  |
| 75 |  |  |  |
| 76 |  |  |  |
| 77 |  |  |  |
| 78 |  |  |  |
| 79 |  |  |  |
| 80 |  |  |  |
| 81 |  |  |  |
| 82 |  |  |  |
| 83 |  |  |  |
| 84 |  |  |  |
| 85 |  |  |  |
| 86 |  |  |  |
| 87 |  |  |  |
| 88 |  |  |  |
| 89 |  |  |  |
| 90 |  |  |  |

|     |    |        |    |
|-----|----|--------|----|
|     |    |        |    |
|     |    |        |    |
|     |    |        |    |
| 91  |    |        |    |
| 92  |    |        |    |
| 93  |    |        |    |
| 94  |    |        |    |
| 95  |    |        |    |
| 96  |    |        |    |
| 97  |    |        |    |
| 98  |    |        |    |
| 99  |    |        |    |
| 100 |    |        |    |
| 101 |    |        |    |
| 102 |    |        |    |
| 103 |    |        |    |
| 104 |    |        |    |
| 105 |    |        |    |
| 106 |    |        |    |
| 107 |    |        |    |
| 108 |    |        |    |
| 109 |    |        |    |
| 110 |    |        |    |
| 111 |    |        |    |
| 112 |    |        |    |
| 113 |    |        |    |
| 114 |    |        |    |
| 115 |    |        |    |
| 116 | N2 | q      | DF |
| 117 |    |        |    |
| 118 | 6  | 0.1562 | 75 |
| 119 | 6  | 0.8641 | 75 |
| 120 | 6  | 1.475  | 75 |



|            |   |         |    |
|------------|---|---------|----|
|            |   |         |    |
|            |   |         |    |
|            |   |         |    |
| <b>121</b> | 6 | 1.241   | 75 |
| <b>122</b> | 6 | 1.168   | 75 |
| <b>123</b> | 6 | 0.6008  | 75 |
| <b>124</b> | 6 | 1.997   | 75 |
| <b>125</b> | 6 | 12.56   | 75 |
| <b>126</b> | 6 | 0.1334  | 75 |
| <b>127</b> | 6 | 0.8641  | 75 |
| <b>128</b> | 6 | 1.101   | 75 |
| <b>129</b> | 6 | 0.724   | 75 |
| <b>130</b> | 6 | 1.101   | 75 |
| <b>131</b> | 6 | 1.779   | 75 |
| <b>132</b> | 6 | 0.708   | 75 |
| <b>133</b> | 6 | 1.319   | 75 |
| <b>134</b> | 6 | 1.085   | 75 |
| <b>135</b> | 6 | 1.011   | 75 |
| <b>136</b> | 6 | 0.4446  | 75 |
| <b>137</b> | 6 | 1.841   | 75 |
| <b>138</b> | 6 | 12.4    | 75 |
| <b>139</b> | 6 | 0.02276 | 75 |
| <b>140</b> | 6 | 0.708   | 75 |
| <b>141</b> | 6 | 0.9453  | 75 |
| <b>142</b> | 6 | 0.5679  | 75 |
| <b>143</b> | 6 | 0.9453  | 75 |
| <b>144</b> | 6 | 1.622   | 75 |
| <b>145</b> | 6 | 0.6107  | 75 |
| <b>146</b> | 6 | 0.3773  | 75 |
| <b>147</b> | 6 | 0.3034  | 75 |
| <b>148</b> | 6 | 0.2634  | 75 |
| <b>149</b> | 6 | 1.133   | 75 |
| <b>150</b> | 6 | 11.69   | 75 |

|            |   |         |    |
|------------|---|---------|----|
|            |   |         |    |
|            |   |         |    |
|            |   |         |    |
| <b>151</b> | 6 | 0.7307  | 75 |
| <b>152</b> | 6 | 0       | 75 |
| <b>153</b> | 6 | 0.2373  | 75 |
| <b>154</b> | 6 | 0.1401  | 75 |
| <b>155</b> | 6 | 0.2373  | 75 |
| <b>156</b> | 6 | 0.9144  | 75 |
| <b>157</b> | 6 | 0.2334  | 75 |
| <b>158</b> | 6 | 0.3074  | 75 |
| <b>159</b> | 6 | 0.8741  | 75 |
| <b>160</b> | 6 | 0.5218  | 75 |
| <b>161</b> | 6 | 11.08   | 75 |
| <b>162</b> | 6 | 1.341   | 75 |
| <b>163</b> | 6 | 0.6107  | 75 |
| <b>164</b> | 6 | 0.3734  | 75 |
| <b>165</b> | 6 | 0.7509  | 75 |
| <b>166</b> | 6 | 0.3734  | 75 |
| <b>167</b> | 6 | 0.3036  | 75 |
| <b>168</b> | 6 | 0.07394 | 75 |
| <b>169</b> | 6 | 0.6407  | 75 |
| <b>170</b> | 6 | 0.7553  | 75 |
| <b>171</b> | 6 | 11.32   | 75 |
| <b>172</b> | 6 | 1.108   | 75 |
| <b>173</b> | 6 | 0.3773  | 75 |
| <b>174</b> | 6 | 0.14    | 75 |
| <b>175</b> | 6 | 0.5174  | 75 |
| <b>176</b> | 6 | 0.14    | 75 |
| <b>177</b> | 6 | 0.5371  | 75 |
| <b>178</b> | 6 | 0.5667  | 75 |
| <b>179</b> | 6 | 0.8292  | 75 |
| <b>180</b> | 6 | 11.39   | 75 |

|            |   |         |    |
|------------|---|---------|----|
|            |   |         |    |
|            |   |         |    |
|            |   |         |    |
| <b>181</b> | 6 | 1.034   | 75 |
| <b>182</b> | 6 | 0.3034  | 75 |
| <b>183</b> | 6 | 0.06602 | 75 |
| <b>184</b> | 6 | 0.4435  | 75 |
| <b>185</b> | 6 | 0.06602 | 75 |
| <b>186</b> | 6 | 0.611   | 75 |
| <b>187</b> | 6 | 1.396   | 75 |
| <b>188</b> | 6 | 11.96   | 75 |
| <b>189</b> | 6 | 0.4674  | 75 |
| <b>190</b> | 6 | 0.2634  | 75 |
| <b>191</b> | 6 | 0.5007  | 75 |
| <b>192</b> | 6 | 0.1232  | 75 |
| <b>193</b> | 6 | 0.5007  | 75 |
| <b>194</b> | 6 | 1.178   | 75 |
| <b>195</b> | 6 | 10.56   | 75 |
| <b>196</b> | 6 | 1.863   | 75 |
| <b>197</b> | 6 | 1.133   | 75 |
| <b>198</b> | 6 | 0.8952  | 75 |
| <b>199</b> | 6 | 1.273   | 75 |
| <b>200</b> | 6 | 0.8952  | 75 |
| <b>201</b> | 6 | 0.2182  | 75 |
| <b>202</b> | 6 | 12.43   | 75 |
| <b>203</b> | 6 | 11.69   | 75 |
| <b>204</b> | 6 | 11.46   | 75 |
| <b>205</b> | 6 | 11.83   | 75 |
| <b>206</b> | 6 | 11.46   | 75 |
| <b>207</b> | 6 | 10.78   | 75 |
| <b>208</b> | 6 | 0.7307  | 75 |
| <b>209</b> | 6 | 0.9681  | 75 |
| <b>210</b> | 6 | 0.5906  | 75 |

|            |   |        |    |
|------------|---|--------|----|
|            |   |        |    |
|            |   |        |    |
|            |   |        |    |
| <b>211</b> | 6 | 0.9681 | 75 |
| <b>212</b> | 6 | 1.645  | 75 |
| <b>213</b> | 6 | 0.2373 | 75 |
| <b>214</b> | 6 | 0.1401 | 75 |
| <b>215</b> | 6 | 0.2373 | 75 |
| <b>216</b> | 6 | 0.9144 | 75 |
| <b>217</b> | 6 | 0.3775 | 75 |
| <b>218</b> | 6 | 0      | 75 |
| <b>219</b> | 6 | 0.677  | 75 |
| <b>220</b> | 6 | 0.3775 | 75 |
| <b>221</b> | 6 | 1.055  | 75 |
| <b>222</b> | 6 | 0.677  | 75 |

| 2way ANOVA<br>Tabular results |                          |                      |         |                 |                   |          |
|-------------------------------|--------------------------|----------------------|---------|-----------------|-------------------|----------|
| 1                             | Table Analyzed           | CAPN2                |         |                 |                   |          |
| 2                             |                          |                      |         |                 |                   |          |
| 3                             | Two-way ANOVA            | Ordinary             |         |                 |                   |          |
| 4                             | Alpha                    | 0.05                 |         |                 |                   |          |
| 5                             |                          |                      |         |                 |                   |          |
| 6                             | Source of Variation      | % of total variation | P value | P value summary | Significant?      |          |
| 7                             | Interaction              | 31.95                | <0.0001 | ****            | Yes               |          |
| 8                             | Time post-winter         | 33.47                | <0.0001 | ****            | Yes               |          |
| 9                             | Treatment                | 14.52                | <0.0001 | ****            | Yes               |          |
| 10                            |                          |                      |         |                 |                   |          |
| 11                            | ANOVA table              | SS                   | DF      | MS              | F (DFn, DFd)      | P value  |
| 12                            | Interaction              | 16000                | 8       | 2000            | F (8, 75) = 14.94 | P<0.0001 |
| 13                            | Time post-winter         | 16760                | 4       | 4190            | F (4, 75) = 31.3  | P<0.0001 |
| 14                            | Treatment                | 7272                 | 2       | 3636            | F (2, 75) = 27.16 | P<0.0001 |
| 15                            | Residual                 | 10040                | 75      | 133.9           |                   |          |
| 16                            |                          |                      |         |                 |                   |          |
| 17                            | Number of missing values | 0                    |         |                 |                   |          |

| 2way ANOVA<br>Multiple comparisons |                                                                                |            |                    |              |         |                  |
|------------------------------------|--------------------------------------------------------------------------------|------------|--------------------|--------------|---------|------------------|
| 1                                  | Compare cell means regardless of rows and columns                              |            |                    |              |         |                  |
| 2                                  |                                                                                |            |                    |              |         |                  |
| 3                                  | Number of families                                                             | 1          |                    |              |         |                  |
| 4                                  | Number of comparisons per family                                               | 105        |                    |              |         |                  |
| 5                                  | Alpha                                                                          | 0.05       |                    |              |         |                  |
| 6                                  |                                                                                |            |                    |              |         |                  |
| 7                                  | Tukey's multiple comparisons test                                              | Mean Diff. | 95.00% CI of diff. | Significant? | Summary | Adjusted P Value |
| 8                                  |                                                                                |            |                    |              |         |                  |
| 9                                  | End of winter:2 weeks of winter vs. End of winter:4 weeks of winter            | 0.1047     | -23.32 to 23.53    | No           | ns      | >0.9999          |
| 10                                 | End of winter:2 weeks of winter vs. End of winter:8 weeks of winter            | 0.1421     | -23.28 to 23.57    | No           | ns      | >0.9999          |
| 11                                 | End of winter:2 weeks of winter vs. 4 weeks post winter:2 weeks of winter      | -0.7254    | -24.15 to 22.7     | No           | ns      | >0.9999          |
| 12                                 | End of winter:2 weeks of winter vs. 4 weeks post winter:4 weeks of winter      | -2.913     | -26.34 to 20.51    | No           | ns      | >0.9999          |
| 13                                 | End of winter:2 weeks of winter vs. 4 weeks post winter:8 weeks of winter      | -23.76     | -47.19 to -0.3322  | Yes          | *       | 0.0435           |
| 14                                 | End of winter:2 weeks of winter vs. 8 weeks post winter:2 weeks of winter      | -2.268     | -25.69 to 21.16    | No           | ns      | >0.9999          |
| 15                                 | End of winter:2 weeks of winter vs. 8 weeks post winter:4 weeks of winter      | -20.7      | -44.13 to 2.727    | No           | ns      | 0.1422           |
| 16                                 | End of winter:2 weeks of winter vs. 8 weeks post winter:8 weeks of winter      | -82.74     | -106.2 to -59.32   | Yes          | ****    | <0.0001          |
| 17                                 | End of winter:2 weeks of winter vs. SPC -4 weeks post winter:2 weeks of winter | 0.1328     | -23.29 to 23.56    | No           | ns      | >0.9999          |
| 18                                 | End of winter:2 weeks of winter vs. SPC -4 weeks post winter:4 weeks of winter | 0.1421     | -23.28 to 23.57    | No           | ns      | >0.9999          |
| 19                                 | End of winter:2 weeks of winter vs. SPC -4 weeks post winter:8 weeks of winter | -0.007331  | -23.43 to 23.42    | No           | ns      | >0.9999          |
| 20                                 | End of winter:2 weeks of winter vs. SPC -8 weeks post winter:2 weeks of winter | -0.07921   | -23.51 to 23.35    | No           | ns      | >0.9999          |
| 21                                 | End of winter:2 weeks of winter vs. SPC -8 weeks post winter:4 weeks of winter | -0.007331  | -23.43 to 23.42    | No           | ns      | >0.9999          |
| 22                                 | End of winter:2 weeks of winter vs. SPC -8 weeks post winter:8 weeks of winter | -0.4728    | -23.9 to 22.95     | No           | ns      | >0.9999          |
| 23                                 | End of winter:4 weeks of winter vs. End of winter:8 weeks of winter            | 0.0374     | -23.39 to 23.46    | No           | ns      | >0.9999          |
| 24                                 | End of winter:4 weeks of winter vs. 4 weeks post winter:2 weeks of winter      | -0.8301    | -24.26 to 22.6     | No           | ns      | >0.9999          |
| 25                                 | End of winter:4 weeks of winter vs. 4 weeks post winter:4 weeks of winter      | -3.018     | -26.44 to 20.41    | No           | ns      | >0.9999          |
| 26                                 | End of winter:4 weeks of winter vs. 4 weeks post winter:8 weeks of winter      | -23.86     | -47.29 to -0.4369  | Yes          | *       | 0.0416           |
| 27                                 | End of winter:4 weeks of winter vs. 8 weeks post winter:2 weeks of winter      | -2.372     | -25.8 to 21.05     | No           | ns      | >0.9999          |
| 28                                 | End of winter:4 weeks of winter vs. 8 weeks post winter:4 weeks of winter      | -20.8      | -44.23 to 2.623    | No           | ns      | 0.1371           |
| 29                                 | End of winter:4 weeks of winter vs. 8 weeks post winter:8 weeks of winter      | -82.85     | -106.3 to -59.42   | Yes          | ****    | <0.0001          |
| 30                                 | End of winter:4 weeks of winter vs. SPC -4 weeks post winter:2 weeks of winter | 0.02807    | -23.4 to 23.45     | No           | ns      | >0.9999          |

| 2way ANOVA<br>Multiple comparisons |                                                                                      |           |                   |     |      |         |
|------------------------------------|--------------------------------------------------------------------------------------|-----------|-------------------|-----|------|---------|
| 31                                 | End of winter:4 weeks of winter vs. SPC -4 weeks post winter:4 weeks of winter       | 0.0374    | -23.39 to 23.46   | No  | ns   | >0.9999 |
| 32                                 | End of winter:4 weeks of winter vs. SPC -4 weeks post winter:8 weeks of winter       | -0.112    | -23.54 to 23.31   | No  | ns   | >0.9999 |
| 33                                 | End of winter:4 weeks of winter vs. SPC -8 weeks post winter:2 weeks of winter       | -0.1839   | -23.61 to 23.24   | No  | ns   | >0.9999 |
| 34                                 | End of winter:4 weeks of winter vs. SPC -8 weeks post winter:4 weeks of winter       | -0.112    | -23.54 to 23.31   | No  | ns   | >0.9999 |
| 35                                 | End of winter:4 weeks of winter vs. SPC -8 weeks post winter:8 weeks of winter       | -0.5775   | -24 to 22.85      | No  | ns   | >0.9999 |
| 36                                 | End of winter:8 weeks of winter vs. 4 weeks post winter:2 weeks of winter            | -0.8675   | -24.29 to 22.56   | No  | ns   | >0.9999 |
| 37                                 | End of winter:8 weeks of winter vs. 4 weeks post winter:4 weeks of winter            | -3.055    | -26.48 to 20.37   | No  | ns   | >0.9999 |
| 38                                 | End of winter:8 weeks of winter vs. 4 weeks post winter:8 weeks of winter            | -23.9     | -47.33 to -0.4743 | Yes | *    | 0.0410  |
| 39                                 | End of winter:8 weeks of winter vs. 8 weeks post winter:2 weeks of winter            | -2.41     | -25.84 to 21.02   | No  | ns   | >0.9999 |
| 40                                 | End of winter:8 weeks of winter vs. 8 weeks post winter:4 weeks of winter            | -20.84    | -44.27 to 2.585   | No  | ns   | 0.1353  |
| 41                                 | End of winter:8 weeks of winter vs. 8 weeks post winter:8 weeks of winter            | -82.89    | -106.3 to -59.46  | Yes | **** | <0.0001 |
| 42                                 | End of winter:8 weeks of winter vs. SPC -4 weeks post winter:2 weeks of winter       | -0.009339 | -23.44 to 23.42   | No  | ns   | >0.9999 |
| 43                                 | End of winter:8 weeks of winter vs. SPC -4 weeks post winter:4 weeks of winter       | 0         | -23.43 to 23.43   | No  | ns   | >0.9999 |
| 44                                 | End of winter:8 weeks of winter vs. SPC -4 weeks post winter:8 weeks of winter       | -0.1494   | -23.58 to 23.28   | No  | ns   | >0.9999 |
| 45                                 | End of winter:8 weeks of winter vs. SPC -8 weeks post winter:2 weeks of winter       | -0.2213   | -23.65 to 23.21   | No  | ns   | >0.9999 |
| 46                                 | End of winter:8 weeks of winter vs. SPC -8 weeks post winter:4 weeks of winter       | -0.1494   | -23.58 to 23.28   | No  | ns   | >0.9999 |
| 47                                 | End of winter:8 weeks of winter vs. SPC -8 weeks post winter:8 weeks of winter       | -0.6149   | -24.04 to 22.81   | No  | ns   | >0.9999 |
| 48                                 | 4 weeks post winter:2 weeks of winter vs. 4 weeks post winter:4 weeks of winter      | -2.187    | -25.61 to 21.24   | No  | ns   | >0.9999 |
| 49                                 | 4 weeks post winter:2 weeks of winter vs. 4 weeks post winter:8 weeks of winter      | -23.03    | -46.46 to 0.3932  | No  | ns   | 0.0588  |
| 50                                 | 4 weeks post winter:2 weeks of winter vs. 8 weeks post winter:2 weeks of winter      | -1.542    | -24.97 to 21.88   | No  | ns   | >0.9999 |
| 51                                 | 4 weeks post winter:2 weeks of winter vs. 8 weeks post winter:4 weeks of winter      | -19.97    | -43.4 to 3.453    | No  | ns   | 0.1819  |
| 52                                 | 4 weeks post winter:2 weeks of winter vs. 8 weeks post winter:8 weeks of winter      | -82.02    | -105.4 to -58.59  | Yes | **** | <0.0001 |
| 53                                 | 4 weeks post winter:2 weeks of winter vs. SPC -4 weeks post winter:2 weeks of winter | 0.8582    | -22.57 to 24.28   | No  | ns   | >0.9999 |
| 54                                 | 4 weeks post winter:2 weeks of winter vs. SPC -4 weeks post winter:4 weeks of winter | 0.8675    | -22.56 to 24.29   | No  | ns   | >0.9999 |
| 55                                 | 4 weeks post winter:2 weeks of winter vs. SPC -4 weeks post winter:8 weeks of winter | 0.7181    | -22.71 to 24.14   | No  | ns   | >0.9999 |
| 56                                 | 4 weeks post winter:2 weeks of winter vs. SPC -8 weeks post winter:2 weeks of winter | 0.6462    | -22.78 to 24.07   | No  | ns   | >0.9999 |
| 57                                 | 4 weeks post winter:2 weeks of winter vs. SPC -8 weeks post winter:4 weeks of winter | 0.7181    | -22.71 to 24.14   | No  | ns   | >0.9999 |
| 58                                 | 4 weeks post winter:2 weeks of winter vs. SPC -8 weeks post winter:8 weeks of winter | 0.2527    | -23.17 to 23.68   | No  | ns   | >0.9999 |
| 59                                 | 4 weeks post winter:4 weeks of winter vs. 4 weeks post winter:8 weeks of winter      | -20.85    | -44.27 to 2.581   | No  | ns   | 0.1351  |
| 60                                 | 4 weeks post winter:4 weeks of winter vs. 8 weeks post winter:2 weeks of winter      | 0.6452    | -22.78 to 24.07   | No  | ns   | >0.9999 |

| 2way ANOVA<br>Multiple comparisons |                                                                                      |        |                  |     |      |         |
|------------------------------------|--------------------------------------------------------------------------------------|--------|------------------|-----|------|---------|
| 61                                 | 4 weeks post winter:4 weeks of winter vs. 8 weeks post winter:4 weeks of winter      | -17.79 | -41.21 to 5.64   | No  | ns   | 0.3476  |
| 62                                 | 4 weeks post winter:4 weeks of winter vs. 8 weeks post winter:8 weeks of winter      | -79.83 | -103.3 to -56.4  | Yes | **** | <0.0001 |
| 63                                 | 4 weeks post winter:4 weeks of winter vs. SPC -4 weeks post winter:2 weeks of winter | 3.046  | -20.38 to 26.47  | No  | ns   | >0.9999 |
| 64                                 | 4 weeks post winter:4 weeks of winter vs. SPC -4 weeks post winter:4 weeks of winter | 3.055  | -20.37 to 26.48  | No  | ns   | >0.9999 |
| 65                                 | 4 weeks post winter:4 weeks of winter vs. SPC -4 weeks post winter:8 weeks of winter | 2.906  | -20.52 to 26.33  | No  | ns   | >0.9999 |
| 66                                 | 4 weeks post winter:4 weeks of winter vs. SPC -8 weeks post winter:2 weeks of winter | 2.834  | -20.59 to 26.26  | No  | ns   | >0.9999 |
| 67                                 | 4 weeks post winter:4 weeks of winter vs. SPC -8 weeks post winter:4 weeks of winter | 2.906  | -20.52 to 26.33  | No  | ns   | >0.9999 |
| 68                                 | 4 weeks post winter:4 weeks of winter vs. SPC -8 weeks post winter:8 weeks of winter | 2.44   | -20.99 to 25.87  | No  | ns   | >0.9999 |
| 69                                 | 4 weeks post winter:8 weeks of winter vs. 8 weeks post winter:2 weeks of winter      | 21.49  | -1.935 to 44.92  | No  | ns   | 0.1070  |
| 70                                 | 4 weeks post winter:8 weeks of winter vs. 8 weeks post winter:4 weeks of winter      | 3.06   | -20.37 to 26.49  | No  | ns   | >0.9999 |
| 71                                 | 4 weeks post winter:8 weeks of winter vs. 8 weeks post winter:8 weeks of winter      | -58.98 | -82.41 to -35.56 | Yes | **** | <0.0001 |
| 72                                 | 4 weeks post winter:8 weeks of winter vs. SPC -4 weeks post winter:2 weeks of winter | 23.89  | 0.465 to 47.32   | Yes | *    | 0.0411  |
| 73                                 | 4 weeks post winter:8 weeks of winter vs. SPC -4 weeks post winter:4 weeks of winter | 23.9   | 0.4743 to 47.33  | Yes | *    | 0.0410  |
| 74                                 | 4 weeks post winter:8 weeks of winter vs. SPC -4 weeks post winter:8 weeks of winter | 23.75  | 0.3249 to 47.18  | Yes | *    | 0.0436  |
| 75                                 | 4 weeks post winter:8 weeks of winter vs. SPC -8 weeks post winter:2 weeks of winter | 23.68  | 0.253 to 47.11   | Yes | *    | 0.0450  |
| 76                                 | 4 weeks post winter:8 weeks of winter vs. SPC -8 weeks post winter:4 weeks of winter | 23.75  | 0.3249 to 47.18  | Yes | *    | 0.0436  |
| 77                                 | 4 weeks post winter:8 weeks of winter vs. SPC -8 weeks post winter:8 weeks of winter | 23.29  | -0.1405 to 46.71 | No  | ns   | 0.0530  |
| 78                                 | 8 weeks post winter:2 weeks of winter vs. 8 weeks post winter:4 weeks of winter      | -18.43 | -41.86 to 4.995  | No  | ns   | 0.2916  |
| 79                                 | 8 weeks post winter:2 weeks of winter vs. 8 weeks post winter:8 weeks of winter      | -80.48 | -103.9 to -57.05 | Yes | **** | <0.0001 |
| 80                                 | 8 weeks post winter:2 weeks of winter vs. SPC -4 weeks post winter:2 weeks of winter | 2.4    | -21.03 to 25.83  | No  | ns   | >0.9999 |
| 81                                 | 8 weeks post winter:2 weeks of winter vs. SPC -4 weeks post winter:4 weeks of winter | 2.41   | -21.02 to 25.84  | No  | ns   | >0.9999 |
| 82                                 | 8 weeks post winter:2 weeks of winter vs. SPC -4 weeks post winter:8 weeks of winter | 2.26   | -21.17 to 25.69  | No  | ns   | >0.9999 |
| 83                                 | 8 weeks post winter:2 weeks of winter vs. SPC -8 weeks post winter:2 weeks of winter | 2.189  | -21.24 to 25.62  | No  | ns   | >0.9999 |
| 84                                 | 8 weeks post winter:2 weeks of winter vs. SPC -8 weeks post winter:4 weeks of winter | 2.26   | -21.17 to 25.69  | No  | ns   | >0.9999 |
| 85                                 | 8 weeks post winter:2 weeks of winter vs. SPC -8 weeks post winter:8 weeks of winter | 1.795  | -21.63 to 25.22  | No  | ns   | >0.9999 |
| 86                                 | 8 weeks post winter:4 weeks of winter vs. 8 weeks post winter:8 weeks of winter      | -62.04 | -85.47 to -38.62 | Yes | **** | <0.0001 |
| 87                                 | 8 weeks post winter:4 weeks of winter vs. SPC -4 weeks post winter:2 weeks of winter | 20.83  | -2.595 to 44.26  | No  | ns   | 0.1357  |
| 88                                 | 8 weeks post winter:4 weeks of winter vs. SPC -4 weeks post winter:4 weeks of winter | 20.84  | -2.585 to 44.27  | No  | ns   | 0.1353  |
| 89                                 | 8 weeks post winter:4 weeks of winter vs. SPC -4 weeks post winter:8 weeks of winter | 20.69  | -2.735 to 44.12  | No  | ns   | 0.1426  |
| 90                                 | 8 weeks post winter:4 weeks of winter vs. SPC -8 weeks post winter:2 weeks of winter | 20.62  | -2.807 to 44.05  | No  | ns   | 0.1462  |



| 2way ANOVA<br>Multiple comparisons |                                                                                           |          |                 |            |             |         |
|------------------------------------|-------------------------------------------------------------------------------------------|----------|-----------------|------------|-------------|---------|
| 91                                 | 8 weeks post winter:4 weeks of winter vs. SPC -8 weeks post winter:4 weeks of winter      | 20.69    | -2.735 to 44.12 | No         | ns          | 0.1426  |
| 92                                 | 8 weeks post winter:4 weeks of winter vs. SPC -8 weeks post winter:8 weeks of winter      | 20.23    | -3.2 to 43.65   | No         | ns          | 0.1672  |
| 93                                 | 8 weeks post winter:8 weeks of winter vs. SPC -4 weeks post winter:2 weeks of winter      | 82.88    | 59.45 to 106.3  | Yes        | ****        | <0.0001 |
| 94                                 | 8 weeks post winter:8 weeks of winter vs. SPC -4 weeks post winter:4 weeks of winter      | 82.89    | 59.46 to 106.3  | Yes        | ****        | <0.0001 |
| 95                                 | 8 weeks post winter:8 weeks of winter vs. SPC -4 weeks post winter:8 weeks of winter      | 82.74    | 59.31 to 106.2  | Yes        | ****        | <0.0001 |
| 96                                 | 8 weeks post winter:8 weeks of winter vs. SPC -8 weeks post winter:2 weeks of winter      | 82.66    | 59.24 to 106.1  | Yes        | ****        | <0.0001 |
| 97                                 | 8 weeks post winter:8 weeks of winter vs. SPC -8 weeks post winter:4 weeks of winter      | 82.74    | 59.31 to 106.2  | Yes        | ****        | <0.0001 |
| 98                                 | 8 weeks post winter:8 weeks of winter vs. SPC -8 weeks post winter:8 weeks of winter      | 82.27    | 58.84 to 105.7  | Yes        | ****        | <0.0001 |
| 99                                 | SPC -4 weeks post winter:2 weeks of winter vs. SPC -4 weeks post winter:4 weeks of winter | 0.009339 | -23.42 to 23.44 | No         | ns          | >0.9999 |
| 100                                | SPC -4 weeks post winter:2 weeks of winter vs. SPC -4 weeks post winter:8 weeks of winter | -0.1401  | -23.57 to 23.29 | No         | ns          | >0.9999 |
| 101                                | SPC -4 weeks post winter:2 weeks of winter vs. SPC -8 weeks post winter:2 weeks of winter | -0.212   | -23.64 to 23.21 | No         | ns          | >0.9999 |
| 102                                | SPC -4 weeks post winter:2 weeks of winter vs. SPC -8 weeks post winter:4 weeks of winter | -0.1401  | -23.57 to 23.29 | No         | ns          | >0.9999 |
| 103                                | SPC -4 weeks post winter:2 weeks of winter vs. SPC -8 weeks post winter:8 weeks of winter | -0.6055  | -24.03 to 22.82 | No         | ns          | >0.9999 |
| 104                                | SPC -4 weeks post winter:4 weeks of winter vs. SPC -4 weeks post winter:8 weeks of winter | -0.1494  | -23.58 to 23.28 | No         | ns          | >0.9999 |
| 105                                | SPC -4 weeks post winter:4 weeks of winter vs. SPC -8 weeks post winter:2 weeks of winter | -0.2213  | -23.65 to 23.21 | No         | ns          | >0.9999 |
| 106                                | SPC -4 weeks post winter:4 weeks of winter vs. SPC -8 weeks post winter:4 weeks of winter | -0.1494  | -23.58 to 23.28 | No         | ns          | >0.9999 |
| 107                                | SPC -4 weeks post winter:4 weeks of winter vs. SPC -8 weeks post winter:8 weeks of winter | -0.6149  | -24.04 to 22.81 | No         | ns          | >0.9999 |
| 108                                | SPC -4 weeks post winter:8 weeks of winter vs. SPC -8 weeks post winter:2 weeks of winter | -0.07187 | -23.5 to 23.35  | No         | ns          | >0.9999 |
| 109                                | SPC -4 weeks post winter:8 weeks of winter vs. SPC -8 weeks post winter:4 weeks of winter | 0        | -23.43 to 23.43 | No         | ns          | >0.9999 |
| 110                                | SPC -4 weeks post winter:8 weeks of winter vs. SPC -8 weeks post winter:8 weeks of winter | -0.4654  | -23.89 to 22.96 | No         | ns          | >0.9999 |
| 111                                | SPC -8 weeks post winter:2 weeks of winter vs. SPC -8 weeks post winter:4 weeks of winter | 0.07187  | -23.35 to 23.5  | No         | ns          | >0.9999 |
| 112                                | SPC -8 weeks post winter:2 weeks of winter vs. SPC -8 weeks post winter:8 weeks of winter | -0.3936  | -23.82 to 23.03 | No         | ns          | >0.9999 |
| 113                                | SPC -8 weeks post winter:4 weeks of winter vs. SPC -8 weeks post winter:8 weeks of winter | -0.4654  | -23.89 to 22.96 | No         | ns          | >0.9999 |
| 114                                |                                                                                           |          |                 |            |             |         |
| 115                                |                                                                                           |          |                 |            |             |         |
| 116                                | Test details                                                                              | Mean 1   | Mean 2          | Mean Diff. | SE of diff. | N1      |
| 117                                |                                                                                           |          |                 |            |             |         |
| 118                                | End of winter:2 weeks of winter vs. End of winter:4 weeks of winter                       | 0.5799   | 0.4752          | 0.1047     | 6.68        | 6       |
| 119                                | End of winter:2 weeks of winter vs. End of winter:8 weeks of winter                       | 0.5799   | 0.4378          | 0.1421     | 6.68        | 6       |
| 120                                | End of winter:2 weeks of winter vs. 4 weeks post winter:2 weeks of winter                 | 0.5799   | 1.305           | -0.7254    | 6.68        | 6       |

| 2way ANOVA<br>Multiple comparisons |                                                                                |        |        |           |      |   |
|------------------------------------|--------------------------------------------------------------------------------|--------|--------|-----------|------|---|
| 121                                | End of winter:2 weeks of winter vs. 4 weeks post winter:4 weeks of winter      | 0.5799 | 3.493  | -2.913    | 6.68 | 6 |
| 122                                | End of winter:2 weeks of winter vs. 4 weeks post winter:8 weeks of winter      | 0.5799 | 24.34  | -23.76    | 6.68 | 6 |
| 123                                | End of winter:2 weeks of winter vs. 8 weeks post winter:2 weeks of winter      | 0.5799 | 2.848  | -2.268    | 6.68 | 6 |
| 124                                | End of winter:2 weeks of winter vs. 8 weeks post winter:4 weeks of winter      | 0.5799 | 21.28  | -20.7     | 6.68 | 6 |
| 125                                | End of winter:2 weeks of winter vs. 8 weeks post winter:8 weeks of winter      | 0.5799 | 83.32  | -82.74    | 6.68 | 6 |
| 126                                | End of winter:2 weeks of winter vs. SPC -4 weeks post winter:2 weeks of winter | 0.5799 | 0.4471 | 0.1328    | 6.68 | 6 |
| 127                                | End of winter:2 weeks of winter vs. SPC -4 weeks post winter:4 weeks of winter | 0.5799 | 0.4378 | 0.1421    | 6.68 | 6 |
| 128                                | End of winter:2 weeks of winter vs. SPC -4 weeks post winter:8 weeks of winter | 0.5799 | 0.5872 | -0.007331 | 6.68 | 6 |
| 129                                | End of winter:2 weeks of winter vs. SPC -8 weeks post winter:2 weeks of winter | 0.5799 | 0.6591 | -0.07921  | 6.68 | 6 |
| 130                                | End of winter:2 weeks of winter vs. SPC -8 weeks post winter:4 weeks of winter | 0.5799 | 0.5872 | -0.007331 | 6.68 | 6 |
| 131                                | End of winter:2 weeks of winter vs. SPC -8 weeks post winter:8 weeks of winter | 0.5799 | 1.053  | -0.4728   | 6.68 | 6 |
| 132                                | End of winter:4 weeks of winter vs. End of winter:8 weeks of winter            | 0.4752 | 0.4378 | 0.0374    | 6.68 | 6 |
| 133                                | End of winter:4 weeks of winter vs. 4 weeks post winter:2 weeks of winter      | 0.4752 | 1.305  | -0.8301   | 6.68 | 6 |
| 134                                | End of winter:4 weeks of winter vs. 4 weeks post winter:4 weeks of winter      | 0.4752 | 3.493  | -3.018    | 6.68 | 6 |
| 135                                | End of winter:4 weeks of winter vs. 4 weeks post winter:8 weeks of winter      | 0.4752 | 24.34  | -23.86    | 6.68 | 6 |
| 136                                | End of winter:4 weeks of winter vs. 8 weeks post winter:2 weeks of winter      | 0.4752 | 2.848  | -2.372    | 6.68 | 6 |
| 137                                | End of winter:4 weeks of winter vs. 8 weeks post winter:4 weeks of winter      | 0.4752 | 21.28  | -20.8     | 6.68 | 6 |
| 138                                | End of winter:4 weeks of winter vs. 8 weeks post winter:8 weeks of winter      | 0.4752 | 83.32  | -82.85    | 6.68 | 6 |
| 139                                | End of winter:4 weeks of winter vs. SPC -4 weeks post winter:2 weeks of winter | 0.4752 | 0.4471 | 0.02807   | 6.68 | 6 |
| 140                                | End of winter:4 weeks of winter vs. SPC -4 weeks post winter:4 weeks of winter | 0.4752 | 0.4378 | 0.0374    | 6.68 | 6 |
| 141                                | End of winter:4 weeks of winter vs. SPC -4 weeks post winter:8 weeks of winter | 0.4752 | 0.5872 | -0.112    | 6.68 | 6 |
| 142                                | End of winter:4 weeks of winter vs. SPC -8 weeks post winter:2 weeks of winter | 0.4752 | 0.6591 | -0.1839   | 6.68 | 6 |
| 143                                | End of winter:4 weeks of winter vs. SPC -8 weeks post winter:4 weeks of winter | 0.4752 | 0.5872 | -0.112    | 6.68 | 6 |
| 144                                | End of winter:4 weeks of winter vs. SPC -8 weeks post winter:8 weeks of winter | 0.4752 | 1.053  | -0.5775   | 6.68 | 6 |
| 145                                | End of winter:8 weeks of winter vs. 4 weeks post winter:2 weeks of winter      | 0.4378 | 1.305  | -0.8675   | 6.68 | 6 |
| 146                                | End of winter:8 weeks of winter vs. 4 weeks post winter:4 weeks of winter      | 0.4378 | 3.493  | -3.055    | 6.68 | 6 |
| 147                                | End of winter:8 weeks of winter vs. 4 weeks post winter:8 weeks of winter      | 0.4378 | 24.34  | -23.9     | 6.68 | 6 |
| 148                                | End of winter:8 weeks of winter vs. 8 weeks post winter:2 weeks of winter      | 0.4378 | 2.848  | -2.41     | 6.68 | 6 |
| 149                                | End of winter:8 weeks of winter vs. 8 weeks post winter:4 weeks of winter      | 0.4378 | 21.28  | -20.84    | 6.68 | 6 |
| 150                                | End of winter:8 weeks of winter vs. 8 weeks post winter:8 weeks of winter      | 0.4378 | 83.32  | -82.89    | 6.68 | 6 |

| 2way ANOVA<br>Multiple comparisons |                                                                                      |        |        |           |      |   |
|------------------------------------|--------------------------------------------------------------------------------------|--------|--------|-----------|------|---|
| 151                                | End of winter:8 weeks of winter vs. SPC -4 weeks post winter:2 weeks of winter       | 0.4378 | 0.4471 | -0.009339 | 6.68 | 6 |
| 152                                | End of winter:8 weeks of winter vs. SPC -4 weeks post winter:4 weeks of winter       | 0.4378 | 0.4378 | 0         | 6.68 | 6 |
| 153                                | End of winter:8 weeks of winter vs. SPC -4 weeks post winter:8 weeks of winter       | 0.4378 | 0.5872 | -0.1494   | 6.68 | 6 |
| 154                                | End of winter:8 weeks of winter vs. SPC -8 weeks post winter:2 weeks of winter       | 0.4378 | 0.6591 | -0.2213   | 6.68 | 6 |
| 155                                | End of winter:8 weeks of winter vs. SPC -8 weeks post winter:4 weeks of winter       | 0.4378 | 0.5872 | -0.1494   | 6.68 | 6 |
| 156                                | End of winter:8 weeks of winter vs. SPC -8 weeks post winter:8 weeks of winter       | 0.4378 | 1.053  | -0.6149   | 6.68 | 6 |
| 157                                | 4 weeks post winter:2 weeks of winter vs. 4 weeks post winter:4 weeks of winter      | 1.305  | 3.493  | -2.187    | 6.68 | 6 |
| 158                                | 4 weeks post winter:2 weeks of winter vs. 4 weeks post winter:8 weeks of winter      | 1.305  | 24.34  | -23.03    | 6.68 | 6 |
| 159                                | 4 weeks post winter:2 weeks of winter vs. 8 weeks post winter:2 weeks of winter      | 1.305  | 2.848  | -1.542    | 6.68 | 6 |
| 160                                | 4 weeks post winter:2 weeks of winter vs. 8 weeks post winter:4 weeks of winter      | 1.305  | 21.28  | -19.97    | 6.68 | 6 |
| 161                                | 4 weeks post winter:2 weeks of winter vs. 8 weeks post winter:8 weeks of winter      | 1.305  | 83.32  | -82.02    | 6.68 | 6 |
| 162                                | 4 weeks post winter:2 weeks of winter vs. SPC -4 weeks post winter:2 weeks of winter | 1.305  | 0.4471 | 0.8582    | 6.68 | 6 |
| 163                                | 4 weeks post winter:2 weeks of winter vs. SPC -4 weeks post winter:4 weeks of winter | 1.305  | 0.4378 | 0.8675    | 6.68 | 6 |
| 164                                | 4 weeks post winter:2 weeks of winter vs. SPC -4 weeks post winter:8 weeks of winter | 1.305  | 0.5872 | 0.7181    | 6.68 | 6 |
| 165                                | 4 weeks post winter:2 weeks of winter vs. SPC -8 weeks post winter:2 weeks of winter | 1.305  | 0.6591 | 0.6462    | 6.68 | 6 |
| 166                                | 4 weeks post winter:2 weeks of winter vs. SPC -8 weeks post winter:4 weeks of winter | 1.305  | 0.5872 | 0.7181    | 6.68 | 6 |
| 167                                | 4 weeks post winter:2 weeks of winter vs. SPC -8 weeks post winter:8 weeks of winter | 1.305  | 1.053  | 0.2527    | 6.68 | 6 |
| 168                                | 4 weeks post winter:4 weeks of winter vs. 4 weeks post winter:8 weeks of winter      | 3.493  | 24.34  | -20.85    | 6.68 | 6 |
| 169                                | 4 weeks post winter:4 weeks of winter vs. 8 weeks post winter:2 weeks of winter      | 3.493  | 2.848  | 0.6452    | 6.68 | 6 |
| 170                                | 4 weeks post winter:4 weeks of winter vs. 8 weeks post winter:4 weeks of winter      | 3.493  | 21.28  | -17.79    | 6.68 | 6 |
| 171                                | 4 weeks post winter:4 weeks of winter vs. 8 weeks post winter:8 weeks of winter      | 3.493  | 83.32  | -79.83    | 6.68 | 6 |
| 172                                | 4 weeks post winter:4 weeks of winter vs. SPC -4 weeks post winter:2 weeks of winter | 3.493  | 0.4471 | 3.046     | 6.68 | 6 |
| 173                                | 4 weeks post winter:4 weeks of winter vs. SPC -4 weeks post winter:4 weeks of winter | 3.493  | 0.4378 | 3.055     | 6.68 | 6 |
| 174                                | 4 weeks post winter:4 weeks of winter vs. SPC -4 weeks post winter:8 weeks of winter | 3.493  | 0.5872 | 2.906     | 6.68 | 6 |
| 175                                | 4 weeks post winter:4 weeks of winter vs. SPC -8 weeks post winter:2 weeks of winter | 3.493  | 0.6591 | 2.834     | 6.68 | 6 |
| 176                                | 4 weeks post winter:4 weeks of winter vs. SPC -8 weeks post winter:4 weeks of winter | 3.493  | 0.5872 | 2.906     | 6.68 | 6 |
| 177                                | 4 weeks post winter:4 weeks of winter vs. SPC -8 weeks post winter:8 weeks of winter | 3.493  | 1.053  | 2.44      | 6.68 | 6 |
| 178                                | 4 weeks post winter:8 weeks of winter vs. 8 weeks post winter:2 weeks of winter      | 24.34  | 2.848  | 21.49     | 6.68 | 6 |
| 179                                | 4 weeks post winter:8 weeks of winter vs. 8 weeks post winter:4 weeks of winter      | 24.34  | 21.28  | 3.06      | 6.68 | 6 |
| 180                                | 4 weeks post winter:8 weeks of winter vs. 8 weeks post winter:8 weeks of winter      | 24.34  | 83.32  | -58.98    | 6.68 | 6 |

| 2way ANOVA<br>Multiple comparisons |                                                                                           |        |        |          |      |   |
|------------------------------------|-------------------------------------------------------------------------------------------|--------|--------|----------|------|---|
| 181                                | 4 weeks post winter:8 weeks of winter vs. SPC -4 weeks post winter:2 weeks of winter      | 24.34  | 0.4471 | 23.89    | 6.68 | 6 |
| 182                                | 4 weeks post winter:8 weeks of winter vs. SPC -4 weeks post winter:4 weeks of winter      | 24.34  | 0.4378 | 23.9     | 6.68 | 6 |
| 183                                | 4 weeks post winter:8 weeks of winter vs. SPC -4 weeks post winter:8 weeks of winter      | 24.34  | 0.5872 | 23.75    | 6.68 | 6 |
| 184                                | 4 weeks post winter:8 weeks of winter vs. SPC -8 weeks post winter:2 weeks of winter      | 24.34  | 0.6591 | 23.68    | 6.68 | 6 |
| 185                                | 4 weeks post winter:8 weeks of winter vs. SPC -8 weeks post winter:4 weeks of winter      | 24.34  | 0.5872 | 23.75    | 6.68 | 6 |
| 186                                | 4 weeks post winter:8 weeks of winter vs. SPC -8 weeks post winter:8 weeks of winter      | 24.34  | 1.053  | 23.29    | 6.68 | 6 |
| 187                                | 8 weeks post winter:2 weeks of winter vs. 8 weeks post winter:4 weeks of winter           | 2.848  | 21.28  | -18.43   | 6.68 | 6 |
| 188                                | 8 weeks post winter:2 weeks of winter vs. 8 weeks post winter:8 weeks of winter           | 2.848  | 83.32  | -80.48   | 6.68 | 6 |
| 189                                | 8 weeks post winter:2 weeks of winter vs. SPC -4 weeks post winter:2 weeks of winter      | 2.848  | 0.4471 | 2.4      | 6.68 | 6 |
| 190                                | 8 weeks post winter:2 weeks of winter vs. SPC -4 weeks post winter:4 weeks of winter      | 2.848  | 0.4378 | 2.41     | 6.68 | 6 |
| 191                                | 8 weeks post winter:2 weeks of winter vs. SPC -4 weeks post winter:8 weeks of winter      | 2.848  | 0.5872 | 2.26     | 6.68 | 6 |
| 192                                | 8 weeks post winter:2 weeks of winter vs. SPC -8 weeks post winter:2 weeks of winter      | 2.848  | 0.6591 | 2.189    | 6.68 | 6 |
| 193                                | 8 weeks post winter:2 weeks of winter vs. SPC -8 weeks post winter:4 weeks of winter      | 2.848  | 0.5872 | 2.26     | 6.68 | 6 |
| 194                                | 8 weeks post winter:2 weeks of winter vs. SPC -8 weeks post winter:8 weeks of winter      | 2.848  | 1.053  | 1.795    | 6.68 | 6 |
| 195                                | 8 weeks post winter:4 weeks of winter vs. 8 weeks post winter:8 weeks of winter           | 21.28  | 83.32  | -62.04   | 6.68 | 6 |
| 196                                | 8 weeks post winter:4 weeks of winter vs. SPC -4 weeks post winter:2 weeks of winter      | 21.28  | 0.4471 | 20.83    | 6.68 | 6 |
| 197                                | 8 weeks post winter:4 weeks of winter vs. SPC -4 weeks post winter:4 weeks of winter      | 21.28  | 0.4378 | 20.84    | 6.68 | 6 |
| 198                                | 8 weeks post winter:4 weeks of winter vs. SPC -4 weeks post winter:8 weeks of winter      | 21.28  | 0.5872 | 20.69    | 6.68 | 6 |
| 199                                | 8 weeks post winter:4 weeks of winter vs. SPC -8 weeks post winter:2 weeks of winter      | 21.28  | 0.6591 | 20.62    | 6.68 | 6 |
| 200                                | 8 weeks post winter:4 weeks of winter vs. SPC -8 weeks post winter:4 weeks of winter      | 21.28  | 0.5872 | 20.69    | 6.68 | 6 |
| 201                                | 8 weeks post winter:4 weeks of winter vs. SPC -8 weeks post winter:8 weeks of winter      | 21.28  | 1.053  | 20.23    | 6.68 | 6 |
| 202                                | 8 weeks post winter:8 weeks of winter vs. SPC -4 weeks post winter:2 weeks of winter      | 83.32  | 0.4471 | 82.88    | 6.68 | 6 |
| 203                                | 8 weeks post winter:8 weeks of winter vs. SPC -4 weeks post winter:4 weeks of winter      | 83.32  | 0.4378 | 82.89    | 6.68 | 6 |
| 204                                | 8 weeks post winter:8 weeks of winter vs. SPC -4 weeks post winter:8 weeks of winter      | 83.32  | 0.5872 | 82.74    | 6.68 | 6 |
| 205                                | 8 weeks post winter:8 weeks of winter vs. SPC -8 weeks post winter:2 weeks of winter      | 83.32  | 0.6591 | 82.66    | 6.68 | 6 |
| 206                                | 8 weeks post winter:8 weeks of winter vs. SPC -8 weeks post winter:4 weeks of winter      | 83.32  | 0.5872 | 82.74    | 6.68 | 6 |
| 207                                | 8 weeks post winter:8 weeks of winter vs. SPC -8 weeks post winter:8 weeks of winter      | 83.32  | 1.053  | 82.27    | 6.68 | 6 |
| 208                                | SPC -4 weeks post winter:2 weeks of winter vs. SPC -4 weeks post winter:4 weeks of winter | 0.4471 | 0.4378 | 0.009339 | 6.68 | 6 |
| 209                                | SPC -4 weeks post winter:2 weeks of winter vs. SPC -4 weeks post winter:8 weeks of winter | 0.4471 | 0.5872 | -0.1401  | 6.68 | 6 |
| 210                                | SPC -4 weeks post winter:2 weeks of winter vs. SPC -8 weeks post winter:2 weeks of winter | 0.4471 | 0.6591 | -0.212   | 6.68 | 6 |

| <b>2way ANOVA</b><br>Multiple comparisons |                                                                                           |        |        |          |      |   |
|-------------------------------------------|-------------------------------------------------------------------------------------------|--------|--------|----------|------|---|
| <b>211</b>                                | SPC -4 weeks post winter:2 weeks of winter vs. SPC -8 weeks post winter:4 weeks of winter | 0.4471 | 0.5872 | -0.1401  | 6.68 | 6 |
| <b>212</b>                                | SPC -4 weeks post winter:2 weeks of winter vs. SPC -8 weeks post winter:8 weeks of winter | 0.4471 | 1.053  | -0.6055  | 6.68 | 6 |
| <b>213</b>                                | SPC -4 weeks post winter:4 weeks of winter vs. SPC -4 weeks post winter:8 weeks of winter | 0.4378 | 0.5872 | -0.1494  | 6.68 | 6 |
| <b>214</b>                                | SPC -4 weeks post winter:4 weeks of winter vs. SPC -8 weeks post winter:2 weeks of winter | 0.4378 | 0.6591 | -0.2213  | 6.68 | 6 |
| <b>215</b>                                | SPC -4 weeks post winter:4 weeks of winter vs. SPC -8 weeks post winter:4 weeks of winter | 0.4378 | 0.5872 | -0.1494  | 6.68 | 6 |
| <b>216</b>                                | SPC -4 weeks post winter:4 weeks of winter vs. SPC -8 weeks post winter:8 weeks of winter | 0.4378 | 1.053  | -0.6149  | 6.68 | 6 |
| <b>217</b>                                | SPC -4 weeks post winter:8 weeks of winter vs. SPC -8 weeks post winter:2 weeks of winter | 0.5872 | 0.6591 | -0.07187 | 6.68 | 6 |
| <b>218</b>                                | SPC -4 weeks post winter:8 weeks of winter vs. SPC -8 weeks post winter:4 weeks of winter | 0.5872 | 0.5872 | 0        | 6.68 | 6 |
| <b>219</b>                                | SPC -4 weeks post winter:8 weeks of winter vs. SPC -8 weeks post winter:8 weeks of winter | 0.5872 | 1.053  | -0.4654  | 6.68 | 6 |
| <b>220</b>                                | SPC -8 weeks post winter:2 weeks of winter vs. SPC -8 weeks post winter:4 weeks of winter | 0.6591 | 0.5872 | 0.07187  | 6.68 | 6 |
| <b>221</b>                                | SPC -8 weeks post winter:2 weeks of winter vs. SPC -8 weeks post winter:8 weeks of winter | 0.6591 | 1.053  | -0.3936  | 6.68 | 6 |
| <b>222</b>                                | SPC -8 weeks post winter:4 weeks of winter vs. SPC -8 weeks post winter:8 weeks of winter | 0.5872 | 1.053  | -0.4654  | 6.68 | 6 |

|    |  |  |  |
|----|--|--|--|
|    |  |  |  |
|    |  |  |  |
|    |  |  |  |
| 1  |  |  |  |
| 2  |  |  |  |
| 3  |  |  |  |
| 4  |  |  |  |
| 5  |  |  |  |
| 6  |  |  |  |
| 7  |  |  |  |
| 8  |  |  |  |
| 9  |  |  |  |
| 10 |  |  |  |
| 11 |  |  |  |
| 12 |  |  |  |
| 13 |  |  |  |
| 14 |  |  |  |
| 15 |  |  |  |
| 16 |  |  |  |
| 17 |  |  |  |
| 18 |  |  |  |
| 19 |  |  |  |
| 20 |  |  |  |
| 21 |  |  |  |
| 22 |  |  |  |
| 23 |  |  |  |
| 24 |  |  |  |
| 25 |  |  |  |
| 26 |  |  |  |
| 27 |  |  |  |
| 28 |  |  |  |
| 29 |  |  |  |
| 30 |  |  |  |

|    |  |  |  |
|----|--|--|--|
|    |  |  |  |
|    |  |  |  |
|    |  |  |  |
| 31 |  |  |  |
| 32 |  |  |  |
| 33 |  |  |  |
| 34 |  |  |  |
| 35 |  |  |  |
| 36 |  |  |  |
| 37 |  |  |  |
| 38 |  |  |  |
| 39 |  |  |  |
| 40 |  |  |  |
| 41 |  |  |  |
| 42 |  |  |  |
| 43 |  |  |  |
| 44 |  |  |  |
| 45 |  |  |  |
| 46 |  |  |  |
| 47 |  |  |  |
| 48 |  |  |  |
| 49 |  |  |  |
| 50 |  |  |  |
| 51 |  |  |  |
| 52 |  |  |  |
| 53 |  |  |  |
| 54 |  |  |  |
| 55 |  |  |  |
| 56 |  |  |  |
| 57 |  |  |  |
| 58 |  |  |  |
| 59 |  |  |  |
| 60 |  |  |  |

|    |  |  |  |
|----|--|--|--|
|    |  |  |  |
|    |  |  |  |
|    |  |  |  |
| 61 |  |  |  |
| 62 |  |  |  |
| 63 |  |  |  |
| 64 |  |  |  |
| 65 |  |  |  |
| 66 |  |  |  |
| 67 |  |  |  |
| 68 |  |  |  |
| 69 |  |  |  |
| 70 |  |  |  |
| 71 |  |  |  |
| 72 |  |  |  |
| 73 |  |  |  |
| 74 |  |  |  |
| 75 |  |  |  |
| 76 |  |  |  |
| 77 |  |  |  |
| 78 |  |  |  |
| 79 |  |  |  |
| 80 |  |  |  |
| 81 |  |  |  |
| 82 |  |  |  |
| 83 |  |  |  |
| 84 |  |  |  |
| 85 |  |  |  |
| 86 |  |  |  |
| 87 |  |  |  |
| 88 |  |  |  |
| 89 |  |  |  |
| 90 |  |  |  |



|            |    |         |    |
|------------|----|---------|----|
|            |    |         |    |
|            |    |         |    |
|            |    |         |    |
| <b>91</b>  |    |         |    |
| <b>92</b>  |    |         |    |
| <b>93</b>  |    |         |    |
| <b>94</b>  |    |         |    |
| <b>95</b>  |    |         |    |
| <b>96</b>  |    |         |    |
| <b>97</b>  |    |         |    |
| <b>98</b>  |    |         |    |
| <b>99</b>  |    |         |    |
| <b>100</b> |    |         |    |
| <b>101</b> |    |         |    |
| <b>102</b> |    |         |    |
| <b>103</b> |    |         |    |
| <b>104</b> |    |         |    |
| <b>105</b> |    |         |    |
| <b>106</b> |    |         |    |
| <b>107</b> |    |         |    |
| <b>108</b> |    |         |    |
| <b>109</b> |    |         |    |
| <b>110</b> |    |         |    |
| <b>111</b> |    |         |    |
| <b>112</b> |    |         |    |
| <b>113</b> |    |         |    |
| <b>114</b> |    |         |    |
| <b>115</b> |    |         |    |
| <b>116</b> | N2 | q       | DF |
| <b>117</b> |    |         |    |
| <b>118</b> | 6  | 0.02217 | 75 |
| <b>119</b> | 6  | 0.03008 | 75 |
| <b>120</b> | 6  | 0.1536  | 75 |

| <b>121</b> | 6 | 0.6167   | 75 |
|------------|---|----------|----|
| <b>122</b> | 6 | 5.03     | 75 |
| <b>123</b> | 6 | 0.4801   | 75 |
| <b>124</b> | 6 | 4.382    | 75 |
| <b>125</b> | 6 | 17.52    | 75 |
| <b>126</b> | 6 | 0.02811  | 75 |
| <b>127</b> | 6 | 0.03008  | 75 |
| <b>128</b> | 6 | 0.001552 | 75 |
| <b>129</b> | 6 | 0.01677  | 75 |
| <b>130</b> | 6 | 0.001552 | 75 |
| <b>131</b> | 6 | 0.1001   | 75 |
| <b>132</b> | 6 | 0.007919 | 75 |
| <b>133</b> | 6 | 0.1757   | 75 |
| <b>134</b> | 6 | 0.6389   | 75 |
| <b>135</b> | 6 | 5.052    | 75 |
| <b>136</b> | 6 | 0.5023   | 75 |
| <b>137</b> | 6 | 4.404    | 75 |
| <b>138</b> | 6 | 17.54    | 75 |
| <b>139</b> | 6 | 0.005942 | 75 |
| <b>140</b> | 6 | 0.007919 | 75 |
| <b>141</b> | 6 | 0.02372  | 75 |
| <b>142</b> | 6 | 0.03893  | 75 |
| <b>143</b> | 6 | 0.02372  | 75 |
| <b>144</b> | 6 | 0.1223   | 75 |
| <b>145</b> | 6 | 0.1837   | 75 |
| <b>146</b> | 6 | 0.6468   | 75 |
| <b>147</b> | 6 | 5.06     | 75 |
| <b>148</b> | 6 | 0.5102   | 75 |
| <b>149</b> | 6 | 4.412    | 75 |
| <b>150</b> | 6 | 17.55    | 75 |

| <b>151</b> | 6 | 0.001977 | 75 |
|------------|---|----------|----|
| <b>152</b> | 6 | 0        | 75 |
| <b>153</b> | 6 | 0.03164  | 75 |
| <b>154</b> | 6 | 0.04685  | 75 |
| <b>155</b> | 6 | 0.03164  | 75 |
| <b>156</b> | 6 | 0.1302   | 75 |
| <b>157</b> | 6 | 0.4631   | 75 |
| <b>158</b> | 6 | 4.876    | 75 |
| <b>159</b> | 6 | 0.3265   | 75 |
| <b>160</b> | 6 | 4.229    | 75 |
| <b>161</b> | 6 | 17.36    | 75 |
| <b>162</b> | 6 | 0.1817   | 75 |
| <b>163</b> | 6 | 0.1837   | 75 |
| <b>164</b> | 6 | 0.152    | 75 |
| <b>165</b> | 6 | 0.1368   | 75 |
| <b>166</b> | 6 | 0.152    | 75 |
| <b>167</b> | 6 | 0.0535   | 75 |
| <b>168</b> | 6 | 4.413    | 75 |
| <b>169</b> | 6 | 0.1366   | 75 |
| <b>170</b> | 6 | 3.766    | 75 |
| <b>171</b> | 6 | 16.9     | 75 |
| <b>172</b> | 6 | 0.6448   | 75 |
| <b>173</b> | 6 | 0.6468   | 75 |
| <b>174</b> | 6 | 0.6151   | 75 |
| <b>175</b> | 6 | 0.5999   | 75 |
| <b>176</b> | 6 | 0.6151   | 75 |
| <b>177</b> | 6 | 0.5166   | 75 |
| <b>178</b> | 6 | 4.55     | 75 |
| <b>179</b> | 6 | 0.6478   | 75 |
| <b>180</b> | 6 | 12.49    | 75 |

| <b>181</b> | 6 | 5.058    | 75 |
|------------|---|----------|----|
| <b>182</b> | 6 | 5.06     | 75 |
| <b>183</b> | 6 | 5.028    | 75 |
| <b>184</b> | 6 | 5.013    | 75 |
| <b>185</b> | 6 | 5.028    | 75 |
| <b>186</b> | 6 | 4.93     | 75 |
| <b>187</b> | 6 | 3.902    | 75 |
| <b>188</b> | 6 | 17.04    | 75 |
| <b>189</b> | 6 | 0.5082   | 75 |
| <b>190</b> | 6 | 0.5102   | 75 |
| <b>191</b> | 6 | 0.4785   | 75 |
| <b>192</b> | 6 | 0.4633   | 75 |
| <b>193</b> | 6 | 0.4785   | 75 |
| <b>194</b> | 6 | 0.38     | 75 |
| <b>195</b> | 6 | 13.14    | 75 |
| <b>196</b> | 6 | 4.41     | 75 |
| <b>197</b> | 6 | 4.412    | 75 |
| <b>198</b> | 6 | 4.381    | 75 |
| <b>199</b> | 6 | 4.365    | 75 |
| <b>200</b> | 6 | 4.381    | 75 |
| <b>201</b> | 6 | 4.282    | 75 |
| <b>202</b> | 6 | 17.55    | 75 |
| <b>203</b> | 6 | 17.55    | 75 |
| <b>204</b> | 6 | 17.52    | 75 |
| <b>205</b> | 6 | 17.5     | 75 |
| <b>206</b> | 6 | 17.52    | 75 |
| <b>207</b> | 6 | 17.42    | 75 |
| <b>208</b> | 6 | 0.001977 | 75 |
| <b>209</b> | 6 | 0.02966  | 75 |
| <b>210</b> | 6 | 0.04488  | 75 |

|            |   |         |    |
|------------|---|---------|----|
|            |   |         |    |
|            |   |         |    |
|            |   |         |    |
| <b>211</b> | 6 | 0.02966 | 75 |
| <b>212</b> | 6 | 0.1282  | 75 |
| <b>213</b> | 6 | 0.03164 | 75 |
| <b>214</b> | 6 | 0.04685 | 75 |
| <b>215</b> | 6 | 0.03164 | 75 |
| <b>216</b> | 6 | 0.1302  | 75 |
| <b>217</b> | 6 | 0.01522 | 75 |
| <b>218</b> | 6 | 0       | 75 |
| <b>219</b> | 6 | 0.09853 | 75 |
| <b>220</b> | 6 | 0.01522 | 75 |
| <b>221</b> | 6 | 0.08332 | 75 |
| <b>222</b> | 6 | 0.09853 | 75 |

| 2way ANOVA<br>Tabular results |                          |                      |         |                 |                   |          |
|-------------------------------|--------------------------|----------------------|---------|-----------------|-------------------|----------|
| 1                             | Table Analyzed           | SLC5A7               |         |                 |                   |          |
| 2                             |                          |                      |         |                 |                   |          |
| 3                             | Two-way ANOVA            | Ordinary             |         |                 |                   |          |
| 4                             | Alpha                    | 0.05                 |         |                 |                   |          |
| 5                             |                          |                      |         |                 |                   |          |
| 6                             | Source of Variation      | % of total variation | P value | P value summary | Significant?      |          |
| 7                             | Interaction              | 16.21                | <0.0001 | ****            | Yes               |          |
| 8                             | Time post-winter         | 46.38                | <0.0001 | ****            | Yes               |          |
| 9                             | Treatment                | 15.81                | <0.0001 | ****            | Yes               |          |
| 10                            |                          |                      |         |                 |                   |          |
| 11                            | ANOVA table              | SS                   | DF      | MS              | F (DFn, DFd)      | P value  |
| 12                            | Interaction              | 47.02                | 8       | 5.877           | F (8, 75) = 7.037 | P<0.0001 |
| 13                            | Time post-winter         | 134.5                | 4       | 33.63           | F (4, 75) = 40.26 | P<0.0001 |
| 14                            | Treatment                | 45.86                | 2       | 22.93           | F (2, 75) = 27.45 | P<0.0001 |
| 15                            | Residual                 | 62.65                | 75      | 0.8353          |                   |          |
| 16                            |                          |                      |         |                 |                   |          |
| 17                            | Number of missing values | 0                    |         |                 |                   |          |

| 2way ANOVA<br>Multiple comparisons |                                                                                |            |                    |              |         |                  |
|------------------------------------|--------------------------------------------------------------------------------|------------|--------------------|--------------|---------|------------------|
| 1                                  | Compare cell means regardless of rows and columns                              |            |                    |              |         |                  |
| 2                                  |                                                                                |            |                    |              |         |                  |
| 3                                  | Number of families                                                             | 1          |                    |              |         |                  |
| 4                                  | Number of comparisons per family                                               | 105        |                    |              |         |                  |
| 5                                  | Alpha                                                                          | 0.05       |                    |              |         |                  |
| 6                                  |                                                                                |            |                    |              |         |                  |
| 7                                  | Tukey's multiple comparisons test                                              | Mean Diff. | 95.00% CI of diff. | Significant? | Summary | Adjusted P Value |
| 8                                  |                                                                                |            |                    |              |         |                  |
| 9                                  | End of winter:2 weeks of winter vs. End of winter:4 weeks of winter            | -0.04389   | -1.894 to 1.807    | No           | ns      | >0.9999          |
| 10                                 | End of winter:2 weeks of winter vs. End of winter:8 weeks of winter            | 0.024      | -1.826 to 1.875    | No           | ns      | >0.9999          |
| 11                                 | End of winter:2 weeks of winter vs. 4 weeks post winter:2 weeks of winter      | -1.348     | -3.198 to 0.5026   | No           | ns      | 0.4165           |
| 12                                 | End of winter:2 weeks of winter vs. 4 weeks post winter:4 weeks of winter      | -1.347     | -3.198 to 0.5032   | No           | ns      | 0.4172           |
| 13                                 | End of winter:2 weeks of winter vs. 4 weeks post winter:8 weeks of winter      | -3.961     | -5.812 to -2.111   | Yes          | ****    | <0.0001          |
| 14                                 | End of winter:2 weeks of winter vs. 8 weeks post winter:2 weeks of winter      | -1.214     | -3.065 to 0.6361   | No           | ns      | 0.5926           |
| 15                                 | End of winter:2 weeks of winter vs. 8 weeks post winter:4 weeks of winter      | -2.278     | -4.128 to -0.4273  | Yes          | **      | 0.0040           |
| 16                                 | End of winter:2 weeks of winter vs. 8 weeks post winter:8 weeks of winter      | -5.615     | -7.466 to -3.765   | Yes          | ****    | <0.0001          |
| 17                                 | End of winter:2 weeks of winter vs. SPC -4 weeks post winter:2 weeks of winter | 0.1421     | -1.708 to 1.993    | No           | ns      | >0.9999          |
| 18                                 | End of winter:2 weeks of winter vs. SPC -4 weeks post winter:4 weeks of winter | 0.024      | -1.826 to 1.875    | No           | ns      | >0.9999          |
| 19                                 | End of winter:2 weeks of winter vs. SPC -4 weeks post winter:8 weeks of winter | -0.4444    | -2.295 to 1.406    | No           | ns      | >0.9999          |
| 20                                 | End of winter:2 weeks of winter vs. SPC -8 weeks post winter:2 weeks of winter | -0.3202    | -2.171 to 1.53     | No           | ns      | >0.9999          |
| 21                                 | End of winter:2 weeks of winter vs. SPC -8 weeks post winter:4 weeks of winter | -0.4444    | -2.295 to 1.406    | No           | ns      | >0.9999          |
| 22                                 | End of winter:2 weeks of winter vs. SPC -8 weeks post winter:8 weeks of winter | -0.8987    | -2.749 to 0.9518   | No           | ns      | 0.9255           |
| 23                                 | End of winter:4 weeks of winter vs. End of winter:8 weeks of winter            | 0.0679     | -1.783 to 1.918    | No           | ns      | >0.9999          |
| 24                                 | End of winter:4 weeks of winter vs. 4 weeks post winter:2 weeks of winter      | -1.304     | -3.154 to 0.5465   | No           | ns      | 0.4728           |
| 25                                 | End of winter:4 weeks of winter vs. 4 weeks post winter:4 weeks of winter      | -1.303     | -3.154 to 0.5471   | No           | ns      | 0.4736           |
| 26                                 | End of winter:4 weeks of winter vs. 4 weeks post winter:8 weeks of winter      | -3.917     | -5.768 to -2.067   | Yes          | ****    | <0.0001          |
| 27                                 | End of winter:4 weeks of winter vs. 8 weeks post winter:2 weeks of winter      | -1.171     | -3.021 to 0.68     | No           | ns      | 0.6511           |
| 28                                 | End of winter:4 weeks of winter vs. 8 weeks post winter:4 weeks of winter      | -2.234     | -4.084 to -0.3834  | Yes          | **      | 0.0053           |
| 29                                 | End of winter:4 weeks of winter vs. 8 weeks post winter:8 weeks of winter      | -5.571     | -7.422 to -3.721   | Yes          | ****    | <0.0001          |
| 30                                 | End of winter:4 weeks of winter vs. SPC -4 weeks post winter:2 weeks of winter | 0.186      | -1.664 to 2.037    | No           | ns      | >0.9999          |

| 2way ANOVA<br>Multiple comparisons |                                                                                      |           |                   |     |      |         |
|------------------------------------|--------------------------------------------------------------------------------------|-----------|-------------------|-----|------|---------|
| 31                                 | End of winter:4 weeks of winter vs. SPC -4 weeks post winter:4 weeks of winter       | 0.0679    | -1.783 to 1.918   | No  | ns   | >0.9999 |
| 32                                 | End of winter:4 weeks of winter vs. SPC -4 weeks post winter:8 weeks of winter       | -0.4005   | -2.251 to 1.45    | No  | ns   | >0.9999 |
| 33                                 | End of winter:4 weeks of winter vs. SPC -8 weeks post winter:2 weeks of winter       | -0.2763   | -2.127 to 1.574   | No  | ns   | >0.9999 |
| 34                                 | End of winter:4 weeks of winter vs. SPC -8 weeks post winter:4 weeks of winter       | -0.4005   | -2.251 to 1.45    | No  | ns   | >0.9999 |
| 35                                 | End of winter:4 weeks of winter vs. SPC -8 weeks post winter:8 weeks of winter       | -0.8548   | -2.705 to 0.9957  | No  | ns   | 0.9488  |
| 36                                 | End of winter:8 weeks of winter vs. 4 weeks post winter:2 weeks of winter            | -1.372    | -3.222 to 0.4786  | No  | ns   | 0.3868  |
| 37                                 | End of winter:8 weeks of winter vs. 4 weeks post winter:4 weeks of winter            | -1.371    | -3.222 to 0.4792  | No  | ns   | 0.3875  |
| 38                                 | End of winter:8 weeks of winter vs. 4 weeks post winter:8 weeks of winter            | -3.985    | -5.836 to -2.135  | Yes | **** | <0.0001 |
| 39                                 | End of winter:8 weeks of winter vs. 8 weeks post winter:2 weeks of winter            | -1.238    | -3.089 to 0.6121  | No  | ns   | 0.5603  |
| 40                                 | End of winter:8 weeks of winter vs. 8 weeks post winter:4 weeks of winter            | -2.302    | -4.152 to -0.4513 | Yes | **   | 0.0034  |
| 41                                 | End of winter:8 weeks of winter vs. 8 weeks post winter:8 weeks of winter            | -5.639    | -7.49 to -3.789   | Yes | **** | <0.0001 |
| 42                                 | End of winter:8 weeks of winter vs. SPC -4 weeks post winter:2 weeks of winter       | 0.1181    | -1.732 to 1.969   | No  | ns   | >0.9999 |
| 43                                 | End of winter:8 weeks of winter vs. SPC -4 weeks post winter:4 weeks of winter       | 0         | -1.85 to 1.85     | No  | ns   | >0.9999 |
| 44                                 | End of winter:8 weeks of winter vs. SPC -4 weeks post winter:8 weeks of winter       | -0.4684   | -2.319 to 1.382   | No  | ns   | 0.9999  |
| 45                                 | End of winter:8 weeks of winter vs. SPC -8 weeks post winter:2 weeks of winter       | -0.3442   | -2.195 to 1.506   | No  | ns   | >0.9999 |
| 46                                 | End of winter:8 weeks of winter vs. SPC -8 weeks post winter:4 weeks of winter       | -0.4684   | -2.319 to 1.382   | No  | ns   | 0.9999  |
| 47                                 | End of winter:8 weeks of winter vs. SPC -8 weeks post winter:8 weeks of winter       | -0.9227   | -2.773 to 0.9278  | No  | ns   | 0.9102  |
| 48                                 | 4 weeks post winter:2 weeks of winter vs. 4 weeks post winter:4 weeks of winter      | 0.0006112 | -1.85 to 1.851    | No  | ns   | >0.9999 |
| 49                                 | 4 weeks post winter:2 weeks of winter vs. 4 weeks post winter:8 weeks of winter      | -2.613    | -4.464 to -0.7628 | Yes | ***  | 0.0004  |
| 50                                 | 4 weeks post winter:2 weeks of winter vs. 8 weeks post winter:2 weeks of winter      | 0.1335    | -1.717 to 1.984   | No  | ns   | >0.9999 |
| 51                                 | 4 weeks post winter:2 weeks of winter vs. 8 weeks post winter:4 weeks of winter      | -0.9299   | -2.78 to 0.9206   | No  | ns   | 0.9052  |
| 52                                 | 4 weeks post winter:2 weeks of winter vs. 8 weeks post winter:8 weeks of winter      | -4.267    | -6.118 to -2.417  | Yes | **** | <0.0001 |
| 53                                 | 4 weeks post winter:2 weeks of winter vs. SPC -4 weeks post winter:2 weeks of winter | 1.49      | -0.3605 to 3.341  | No  | ns   | 0.2574  |
| 54                                 | 4 weeks post winter:2 weeks of winter vs. SPC -4 weeks post winter:4 weeks of winter | 1.372     | -0.4786 to 3.222  | No  | ns   | 0.3868  |
| 55                                 | 4 weeks post winter:2 weeks of winter vs. SPC -4 weeks post winter:8 weeks of winter | 0.9034    | -0.9471 to 2.754  | No  | ns   | 0.9226  |
| 56                                 | 4 weeks post winter:2 weeks of winter vs. SPC -8 weeks post winter:2 weeks of winter | 1.028     | -0.8228 to 2.878  | No  | ns   | 0.8210  |
| 57                                 | 4 weeks post winter:2 weeks of winter vs. SPC -8 weeks post winter:4 weeks of winter | 0.9034    | -0.9471 to 2.754  | No  | ns   | 0.9226  |
| 58                                 | 4 weeks post winter:2 weeks of winter vs. SPC -8 weeks post winter:8 weeks of winter | 0.4492    | -1.401 to 2.3     | No  | ns   | >0.9999 |
| 59                                 | 4 weeks post winter:4 weeks of winter vs. 4 weeks post winter:8 weeks of winter      | -2.614    | -4.464 to -0.7634 | Yes | ***  | 0.0004  |
| 60                                 | 4 weeks post winter:4 weeks of winter vs. 8 weeks post winter:2 weeks of winter      | 0.1329    | -1.718 to 1.983   | No  | ns   | >0.9999 |



| 2way ANOVA<br>Multiple comparisons |                                                                                      |         |                   |     |      |         |
|------------------------------------|--------------------------------------------------------------------------------------|---------|-------------------|-----|------|---------|
| 61                                 | 4 weeks post winter:4 weeks of winter vs. 8 weeks post winter:4 weeks of winter      | -0.9305 | -2.781 to 0.92    | No  | ns   | 0.9048  |
| 62                                 | 4 weeks post winter:4 weeks of winter vs. 8 weeks post winter:8 weeks of winter      | -4.268  | -6.118 to -2.417  | Yes | **** | <0.0001 |
| 63                                 | 4 weeks post winter:4 weeks of winter vs. SPC -4 weeks post winter:2 weeks of winter | 1.489   | -0.3611 to 3.34   | No  | ns   | 0.2580  |
| 64                                 | 4 weeks post winter:4 weeks of winter vs. SPC -4 weeks post winter:4 weeks of winter | 1.371   | -0.4792 to 3.222  | No  | ns   | 0.3875  |
| 65                                 | 4 weeks post winter:4 weeks of winter vs. SPC -4 weeks post winter:8 weeks of winter | 0.9028  | -0.9477 to 2.753  | No  | ns   | 0.9230  |
| 66                                 | 4 weeks post winter:4 weeks of winter vs. SPC -8 weeks post winter:2 weeks of winter | 1.027   | -0.8235 to 2.878  | No  | ns   | 0.8216  |
| 67                                 | 4 weeks post winter:4 weeks of winter vs. SPC -8 weeks post winter:4 weeks of winter | 0.9028  | -0.9477 to 2.753  | No  | ns   | 0.9230  |
| 68                                 | 4 weeks post winter:4 weeks of winter vs. SPC -8 weeks post winter:8 weeks of winter | 0.4486  | -1.402 to 2.299   | No  | ns   | >0.9999 |
| 69                                 | 4 weeks post winter:8 weeks of winter vs. 8 weeks post winter:2 weeks of winter      | 2.747   | 0.8963 to 4.597   | Yes | ***  | 0.0002  |
| 70                                 | 4 weeks post winter:8 weeks of winter vs. 8 weeks post winter:4 weeks of winter      | 1.683   | -0.1671 to 3.534  | No  | ns   | 0.1143  |
| 71                                 | 4 weeks post winter:8 weeks of winter vs. 8 weeks post winter:8 weeks of winter      | -1.654  | -3.504 to 0.1965  | No  | ns   | 0.1307  |
| 72                                 | 4 weeks post winter:8 weeks of winter vs. SPC -4 weeks post winter:2 weeks of winter | 4.103   | 2.253 to 5.954    | Yes | **** | <0.0001 |
| 73                                 | 4 weeks post winter:8 weeks of winter vs. SPC -4 weeks post winter:4 weeks of winter | 3.985   | 2.135 to 5.836    | Yes | **** | <0.0001 |
| 74                                 | 4 weeks post winter:8 weeks of winter vs. SPC -4 weeks post winter:8 weeks of winter | 3.517   | 1.666 to 5.367    | Yes | **** | <0.0001 |
| 75                                 | 4 weeks post winter:8 weeks of winter vs. SPC -8 weeks post winter:2 weeks of winter | 3.641   | 1.79 to 5.491     | Yes | **** | <0.0001 |
| 76                                 | 4 weeks post winter:8 weeks of winter vs. SPC -8 weeks post winter:4 weeks of winter | 3.517   | 1.666 to 5.367    | Yes | **** | <0.0001 |
| 77                                 | 4 weeks post winter:8 weeks of winter vs. SPC -8 weeks post winter:8 weeks of winter | 3.063   | 1.212 to 4.913    | Yes | **** | <0.0001 |
| 78                                 | 8 weeks post winter:2 weeks of winter vs. 8 weeks post winter:4 weeks of winter      | -1.063  | -2.914 to 0.7871  | No  | ns   | 0.7828  |
| 79                                 | 8 weeks post winter:2 weeks of winter vs. 8 weeks post winter:8 weeks of winter      | -4.401  | -6.251 to -2.55   | Yes | **** | <0.0001 |
| 80                                 | 8 weeks post winter:2 weeks of winter vs. SPC -4 weeks post winter:2 weeks of winter | 1.357   | -0.494 to 3.207   | No  | ns   | 0.4057  |
| 81                                 | 8 weeks post winter:2 weeks of winter vs. SPC -4 weeks post winter:4 weeks of winter | 1.238   | -0.6121 to 3.089  | No  | ns   | 0.5603  |
| 82                                 | 8 weeks post winter:2 weeks of winter vs. SPC -4 weeks post winter:8 weeks of winter | 0.77    | -1.081 to 2.62    | No  | ns   | 0.9782  |
| 83                                 | 8 weeks post winter:2 weeks of winter vs. SPC -8 weeks post winter:2 weeks of winter | 0.8942  | -0.9563 to 2.745  | No  | ns   | 0.9282  |
| 84                                 | 8 weeks post winter:2 weeks of winter vs. SPC -8 weeks post winter:4 weeks of winter | 0.77    | -1.081 to 2.62    | No  | ns   | 0.9782  |
| 85                                 | 8 weeks post winter:2 weeks of winter vs. SPC -8 weeks post winter:8 weeks of winter | 0.3157  | -1.535 to 2.166   | No  | ns   | >0.9999 |
| 86                                 | 8 weeks post winter:4 weeks of winter vs. 8 weeks post winter:8 weeks of winter      | -3.337  | -5.188 to -1.487  | Yes | **** | <0.0001 |
| 87                                 | 8 weeks post winter:4 weeks of winter vs. SPC -4 weeks post winter:2 weeks of winter | 2.42    | 0.5694 to 4.27    | Yes | **   | 0.0016  |
| 88                                 | 8 weeks post winter:4 weeks of winter vs. SPC -4 weeks post winter:4 weeks of winter | 2.302   | 0.4513 to 4.152   | Yes | **   | 0.0034  |
| 89                                 | 8 weeks post winter:4 weeks of winter vs. SPC -4 weeks post winter:8 weeks of winter | 1.833   | -0.01714 to 3.684 | No  | ns   | 0.0547  |
| 90                                 | 8 weeks post winter:4 weeks of winter vs. SPC -8 weeks post winter:2 weeks of winter | 1.958   | 0.1071 to 3.808   | Yes | *    | 0.0279  |

| 2way ANOVA<br>Multiple comparisons |                                                                                           |         |                   |            |             |         |
|------------------------------------|-------------------------------------------------------------------------------------------|---------|-------------------|------------|-------------|---------|
| 91                                 | 8 weeks post winter:4 weeks of winter vs. SPC -8 weeks post winter:4 weeks of winter      | 1.833   | -0.01714 to 3.684 | No         | ns          | 0.0547  |
| 92                                 | 8 weeks post winter:4 weeks of winter vs. SPC -8 weeks post winter:8 weeks of winter      | 1.379   | -0.4714 to 3.23   | No         | ns          | 0.3781  |
| 93                                 | 8 weeks post winter:8 weeks of winter vs. SPC -4 weeks post winter:2 weeks of winter      | 5.757   | 3.907 to 7.608    | Yes        | ****        | <0.0001 |
| 94                                 | 8 weeks post winter:8 weeks of winter vs. SPC -4 weeks post winter:4 weeks of winter      | 5.639   | 3.789 to 7.49     | Yes        | ****        | <0.0001 |
| 95                                 | 8 weeks post winter:8 weeks of winter vs. SPC -4 weeks post winter:8 weeks of winter      | 5.171   | 3.32 to 7.021     | Yes        | ****        | <0.0001 |
| 96                                 | 8 weeks post winter:8 weeks of winter vs. SPC -8 weeks post winter:2 weeks of winter      | 5.295   | 3.444 to 7.145    | Yes        | ****        | <0.0001 |
| 97                                 | 8 weeks post winter:8 weeks of winter vs. SPC -8 weeks post winter:4 weeks of winter      | 5.171   | 3.32 to 7.021     | Yes        | ****        | <0.0001 |
| 98                                 | 8 weeks post winter:8 weeks of winter vs. SPC -8 weeks post winter:8 weeks of winter      | 4.717   | 2.866 to 6.567    | Yes        | ****        | <0.0001 |
| 99                                 | SPC -4 weeks post winter:2 weeks of winter vs. SPC -4 weeks post winter:4 weeks of winter | -0.1181 | -1.969 to 1.732   | No         | ns          | >0.9999 |
| 100                                | SPC -4 weeks post winter:2 weeks of winter vs. SPC -4 weeks post winter:8 weeks of winter | -0.5866 | -2.437 to 1.264   | No         | ns          | 0.9984  |
| 101                                | SPC -4 weeks post winter:2 weeks of winter vs. SPC -8 weeks post winter:2 weeks of winter | -0.4623 | -2.313 to 1.388   | No         | ns          | 0.9999  |
| 102                                | SPC -4 weeks post winter:2 weeks of winter vs. SPC -8 weeks post winter:4 weeks of winter | -0.5866 | -2.437 to 1.264   | No         | ns          | 0.9984  |
| 103                                | SPC -4 weeks post winter:2 weeks of winter vs. SPC -8 weeks post winter:8 weeks of winter | -1.041  | -2.891 to 0.8097  | No         | ns          | 0.8074  |
| 104                                | SPC -4 weeks post winter:4 weeks of winter vs. SPC -4 weeks post winter:8 weeks of winter | -0.4684 | -2.319 to 1.382   | No         | ns          | 0.9999  |
| 105                                | SPC -4 weeks post winter:4 weeks of winter vs. SPC -8 weeks post winter:2 weeks of winter | -0.3442 | -2.195 to 1.506   | No         | ns          | >0.9999 |
| 106                                | SPC -4 weeks post winter:4 weeks of winter vs. SPC -8 weeks post winter:4 weeks of winter | -0.4684 | -2.319 to 1.382   | No         | ns          | 0.9999  |
| 107                                | SPC -4 weeks post winter:4 weeks of winter vs. SPC -8 weeks post winter:8 weeks of winter | -0.9227 | -2.773 to 0.9278  | No         | ns          | 0.9102  |
| 108                                | SPC -4 weeks post winter:8 weeks of winter vs. SPC -8 weeks post winter:2 weeks of winter | 0.1242  | -1.726 to 1.975   | No         | ns          | >0.9999 |
| 109                                | SPC -4 weeks post winter:8 weeks of winter vs. SPC -8 weeks post winter:4 weeks of winter | 0       | -1.85 to 1.85     | No         | ns          | >0.9999 |
| 110                                | SPC -4 weeks post winter:8 weeks of winter vs. SPC -8 weeks post winter:8 weeks of winter | -0.4542 | -2.305 to 1.396   | No         | ns          | >0.9999 |
| 111                                | SPC -8 weeks post winter:2 weeks of winter vs. SPC -8 weeks post winter:4 weeks of winter | -0.1242 | -1.975 to 1.726   | No         | ns          | >0.9999 |
| 112                                | SPC -8 weeks post winter:2 weeks of winter vs. SPC -8 weeks post winter:8 weeks of winter | -0.5784 | -2.429 to 1.272   | No         | ns          | 0.9987  |
| 113                                | SPC -8 weeks post winter:4 weeks of winter vs. SPC -8 weeks post winter:8 weeks of winter | -0.4542 | -2.305 to 1.396   | No         | ns          | >0.9999 |
| 114                                |                                                                                           |         |                   |            |             |         |
| 115                                |                                                                                           |         |                   |            |             |         |
| 116                                | Test details                                                                              | Mean 1  | Mean 2            | Mean Diff. | SE of diff. | N1      |
| 117                                |                                                                                           |         |                   |            |             |         |
| 118                                | End of winter:2 weeks of winter vs. End of winter:4 weeks of winter                       | 0.9046  | 0.9485            | -0.04389   | 0.5277      | 6       |
| 119                                | End of winter:2 weeks of winter vs. End of winter:8 weeks of winter                       | 0.9046  | 0.8806            | 0.024      | 0.5277      | 6       |
| 120                                | End of winter:2 weeks of winter vs. 4 weeks post winter:2 weeks of winter                 | 0.9046  | 2.252             | -1.348     | 0.5277      | 6       |

| 2way ANOVA<br>Multiple comparisons |                                                                                |        |        |         |        |   |
|------------------------------------|--------------------------------------------------------------------------------|--------|--------|---------|--------|---|
| 121                                | End of winter:2 weeks of winter vs. 4 weeks post winter:4 weeks of winter      | 0.9046 | 2.252  | -1.347  | 0.5277 | 6 |
| 122                                | End of winter:2 weeks of winter vs. 4 weeks post winter:8 weeks of winter      | 0.9046 | 4.866  | -3.961  | 0.5277 | 6 |
| 123                                | End of winter:2 weeks of winter vs. 8 weeks post winter:2 weeks of winter      | 0.9046 | 2.119  | -1.214  | 0.5277 | 6 |
| 124                                | End of winter:2 weeks of winter vs. 8 weeks post winter:4 weeks of winter      | 0.9046 | 3.182  | -2.278  | 0.5277 | 6 |
| 125                                | End of winter:2 weeks of winter vs. 8 weeks post winter:8 weeks of winter      | 0.9046 | 6.52   | -5.615  | 0.5277 | 6 |
| 126                                | End of winter:2 weeks of winter vs. SPC -4 weeks post winter:2 weeks of winter | 0.9046 | 0.7625 | 0.1421  | 0.5277 | 6 |
| 127                                | End of winter:2 weeks of winter vs. SPC -4 weeks post winter:4 weeks of winter | 0.9046 | 0.8806 | 0.024   | 0.5277 | 6 |
| 128                                | End of winter:2 weeks of winter vs. SPC -4 weeks post winter:8 weeks of winter | 0.9046 | 1.349  | -0.4444 | 0.5277 | 6 |
| 129                                | End of winter:2 weeks of winter vs. SPC -8 weeks post winter:2 weeks of winter | 0.9046 | 1.225  | -0.3202 | 0.5277 | 6 |
| 130                                | End of winter:2 weeks of winter vs. SPC -8 weeks post winter:4 weeks of winter | 0.9046 | 1.349  | -0.4444 | 0.5277 | 6 |
| 131                                | End of winter:2 weeks of winter vs. SPC -8 weeks post winter:8 weeks of winter | 0.9046 | 1.803  | -0.8987 | 0.5277 | 6 |
| 132                                | End of winter:4 weeks of winter vs. End of winter:8 weeks of winter            | 0.9485 | 0.8806 | 0.0679  | 0.5277 | 6 |
| 133                                | End of winter:4 weeks of winter vs. 4 weeks post winter:2 weeks of winter      | 0.9485 | 2.252  | -1.304  | 0.5277 | 6 |
| 134                                | End of winter:4 weeks of winter vs. 4 weeks post winter:4 weeks of winter      | 0.9485 | 2.252  | -1.303  | 0.5277 | 6 |
| 135                                | End of winter:4 weeks of winter vs. 4 weeks post winter:8 weeks of winter      | 0.9485 | 4.866  | -3.917  | 0.5277 | 6 |
| 136                                | End of winter:4 weeks of winter vs. 8 weeks post winter:2 weeks of winter      | 0.9485 | 2.119  | -1.171  | 0.5277 | 6 |
| 137                                | End of winter:4 weeks of winter vs. 8 weeks post winter:4 weeks of winter      | 0.9485 | 3.182  | -2.234  | 0.5277 | 6 |
| 138                                | End of winter:4 weeks of winter vs. 8 weeks post winter:8 weeks of winter      | 0.9485 | 6.52   | -5.571  | 0.5277 | 6 |
| 139                                | End of winter:4 weeks of winter vs. SPC -4 weeks post winter:2 weeks of winter | 0.9485 | 0.7625 | 0.186   | 0.5277 | 6 |
| 140                                | End of winter:4 weeks of winter vs. SPC -4 weeks post winter:4 weeks of winter | 0.9485 | 0.8806 | 0.0679  | 0.5277 | 6 |
| 141                                | End of winter:4 weeks of winter vs. SPC -4 weeks post winter:8 weeks of winter | 0.9485 | 1.349  | -0.4005 | 0.5277 | 6 |
| 142                                | End of winter:4 weeks of winter vs. SPC -8 weeks post winter:2 weeks of winter | 0.9485 | 1.225  | -0.2763 | 0.5277 | 6 |
| 143                                | End of winter:4 weeks of winter vs. SPC -8 weeks post winter:4 weeks of winter | 0.9485 | 1.349  | -0.4005 | 0.5277 | 6 |
| 144                                | End of winter:4 weeks of winter vs. SPC -8 weeks post winter:8 weeks of winter | 0.9485 | 1.803  | -0.8548 | 0.5277 | 6 |
| 145                                | End of winter:8 weeks of winter vs. 4 weeks post winter:2 weeks of winter      | 0.8806 | 2.252  | -1.372  | 0.5277 | 6 |
| 146                                | End of winter:8 weeks of winter vs. 4 weeks post winter:4 weeks of winter      | 0.8806 | 2.252  | -1.371  | 0.5277 | 6 |
| 147                                | End of winter:8 weeks of winter vs. 4 weeks post winter:8 weeks of winter      | 0.8806 | 4.866  | -3.985  | 0.5277 | 6 |
| 148                                | End of winter:8 weeks of winter vs. 8 weeks post winter:2 weeks of winter      | 0.8806 | 2.119  | -1.238  | 0.5277 | 6 |
| 149                                | End of winter:8 weeks of winter vs. 8 weeks post winter:4 weeks of winter      | 0.8806 | 3.182  | -2.302  | 0.5277 | 6 |
| 150                                | End of winter:8 weeks of winter vs. 8 weeks post winter:8 weeks of winter      | 0.8806 | 6.52   | -5.639  | 0.5277 | 6 |

| 2way ANOVA<br>Multiple comparisons |                                                                                      |        |        |           |        |   |
|------------------------------------|--------------------------------------------------------------------------------------|--------|--------|-----------|--------|---|
| 151                                | End of winter:8 weeks of winter vs. SPC -4 weeks post winter:2 weeks of winter       | 0.8806 | 0.7625 | 0.1181    | 0.5277 | 6 |
| 152                                | End of winter:8 weeks of winter vs. SPC -4 weeks post winter:4 weeks of winter       | 0.8806 | 0.8806 | 0         | 0.5277 | 6 |
| 153                                | End of winter:8 weeks of winter vs. SPC -4 weeks post winter:8 weeks of winter       | 0.8806 | 1.349  | -0.4684   | 0.5277 | 6 |
| 154                                | End of winter:8 weeks of winter vs. SPC -8 weeks post winter:2 weeks of winter       | 0.8806 | 1.225  | -0.3442   | 0.5277 | 6 |
| 155                                | End of winter:8 weeks of winter vs. SPC -8 weeks post winter:4 weeks of winter       | 0.8806 | 1.349  | -0.4684   | 0.5277 | 6 |
| 156                                | End of winter:8 weeks of winter vs. SPC -8 weeks post winter:8 weeks of winter       | 0.8806 | 1.803  | -0.9227   | 0.5277 | 6 |
| 157                                | 4 weeks post winter:2 weeks of winter vs. 4 weeks post winter:4 weeks of winter      | 2.252  | 2.252  | 0.0006112 | 0.5277 | 6 |
| 158                                | 4 weeks post winter:2 weeks of winter vs. 4 weeks post winter:8 weeks of winter      | 2.252  | 4.866  | -2.613    | 0.5277 | 6 |
| 159                                | 4 weeks post winter:2 weeks of winter vs. 8 weeks post winter:2 weeks of winter      | 2.252  | 2.119  | 0.1335    | 0.5277 | 6 |
| 160                                | 4 weeks post winter:2 weeks of winter vs. 8 weeks post winter:4 weeks of winter      | 2.252  | 3.182  | -0.9299   | 0.5277 | 6 |
| 161                                | 4 weeks post winter:2 weeks of winter vs. 8 weeks post winter:8 weeks of winter      | 2.252  | 6.52   | -4.267    | 0.5277 | 6 |
| 162                                | 4 weeks post winter:2 weeks of winter vs. SPC -4 weeks post winter:2 weeks of winter | 2.252  | 0.7625 | 1.49      | 0.5277 | 6 |
| 163                                | 4 weeks post winter:2 weeks of winter vs. SPC -4 weeks post winter:4 weeks of winter | 2.252  | 0.8806 | 1.372     | 0.5277 | 6 |
| 164                                | 4 weeks post winter:2 weeks of winter vs. SPC -4 weeks post winter:8 weeks of winter | 2.252  | 1.349  | 0.9034    | 0.5277 | 6 |
| 165                                | 4 weeks post winter:2 weeks of winter vs. SPC -8 weeks post winter:2 weeks of winter | 2.252  | 1.225  | 1.028     | 0.5277 | 6 |
| 166                                | 4 weeks post winter:2 weeks of winter vs. SPC -8 weeks post winter:4 weeks of winter | 2.252  | 1.349  | 0.9034    | 0.5277 | 6 |
| 167                                | 4 weeks post winter:2 weeks of winter vs. SPC -8 weeks post winter:8 weeks of winter | 2.252  | 1.803  | 0.4492    | 0.5277 | 6 |
| 168                                | 4 weeks post winter:4 weeks of winter vs. 4 weeks post winter:8 weeks of winter      | 2.252  | 4.866  | -2.614    | 0.5277 | 6 |
| 169                                | 4 weeks post winter:4 weeks of winter vs. 8 weeks post winter:2 weeks of winter      | 2.252  | 2.119  | 0.1329    | 0.5277 | 6 |
| 170                                | 4 weeks post winter:4 weeks of winter vs. 8 weeks post winter:4 weeks of winter      | 2.252  | 3.182  | -0.9305   | 0.5277 | 6 |
| 171                                | 4 weeks post winter:4 weeks of winter vs. 8 weeks post winter:8 weeks of winter      | 2.252  | 6.52   | -4.268    | 0.5277 | 6 |
| 172                                | 4 weeks post winter:4 weeks of winter vs. SPC -4 weeks post winter:2 weeks of winter | 2.252  | 0.7625 | 1.489     | 0.5277 | 6 |
| 173                                | 4 weeks post winter:4 weeks of winter vs. SPC -4 weeks post winter:4 weeks of winter | 2.252  | 0.8806 | 1.371     | 0.5277 | 6 |
| 174                                | 4 weeks post winter:4 weeks of winter vs. SPC -4 weeks post winter:8 weeks of winter | 2.252  | 1.349  | 0.9028    | 0.5277 | 6 |
| 175                                | 4 weeks post winter:4 weeks of winter vs. SPC -8 weeks post winter:2 weeks of winter | 2.252  | 1.225  | 1.027     | 0.5277 | 6 |
| 176                                | 4 weeks post winter:4 weeks of winter vs. SPC -8 weeks post winter:4 weeks of winter | 2.252  | 1.349  | 0.9028    | 0.5277 | 6 |
| 177                                | 4 weeks post winter:4 weeks of winter vs. SPC -8 weeks post winter:8 weeks of winter | 2.252  | 1.803  | 0.4486    | 0.5277 | 6 |
| 178                                | 4 weeks post winter:8 weeks of winter vs. 8 weeks post winter:2 weeks of winter      | 4.866  | 2.119  | 2.747     | 0.5277 | 6 |
| 179                                | 4 weeks post winter:8 weeks of winter vs. 8 weeks post winter:4 weeks of winter      | 4.866  | 3.182  | 1.683     | 0.5277 | 6 |
| 180                                | 4 weeks post winter:8 weeks of winter vs. 8 weeks post winter:8 weeks of winter      | 4.866  | 6.52   | -1.654    | 0.5277 | 6 |

| 2way ANOVA<br>Multiple comparisons |                                                                                           |        |        |         |        |   |
|------------------------------------|-------------------------------------------------------------------------------------------|--------|--------|---------|--------|---|
| <b>181</b>                         | 4 weeks post winter:8 weeks of winter vs. SPC -4 weeks post winter:2 weeks of winter      | 4.866  | 0.7625 | 4.103   | 0.5277 | 6 |
| <b>182</b>                         | 4 weeks post winter:8 weeks of winter vs. SPC -4 weeks post winter:4 weeks of winter      | 4.866  | 0.8806 | 3.985   | 0.5277 | 6 |
| <b>183</b>                         | 4 weeks post winter:8 weeks of winter vs. SPC -4 weeks post winter:8 weeks of winter      | 4.866  | 1.349  | 3.517   | 0.5277 | 6 |
| <b>184</b>                         | 4 weeks post winter:8 weeks of winter vs. SPC -8 weeks post winter:2 weeks of winter      | 4.866  | 1.225  | 3.641   | 0.5277 | 6 |
| <b>185</b>                         | 4 weeks post winter:8 weeks of winter vs. SPC -8 weeks post winter:4 weeks of winter      | 4.866  | 1.349  | 3.517   | 0.5277 | 6 |
| <b>186</b>                         | 4 weeks post winter:8 weeks of winter vs. SPC -8 weeks post winter:8 weeks of winter      | 4.866  | 1.803  | 3.063   | 0.5277 | 6 |
| <b>187</b>                         | 8 weeks post winter:2 weeks of winter vs. 8 weeks post winter:4 weeks of winter           | 2.119  | 3.182  | -1.063  | 0.5277 | 6 |
| <b>188</b>                         | 8 weeks post winter:2 weeks of winter vs. 8 weeks post winter:8 weeks of winter           | 2.119  | 6.52   | -4.401  | 0.5277 | 6 |
| <b>189</b>                         | 8 weeks post winter:2 weeks of winter vs. SPC -4 weeks post winter:2 weeks of winter      | 2.119  | 0.7625 | 1.357   | 0.5277 | 6 |
| <b>190</b>                         | 8 weeks post winter:2 weeks of winter vs. SPC -4 weeks post winter:4 weeks of winter      | 2.119  | 0.8806 | 1.238   | 0.5277 | 6 |
| <b>191</b>                         | 8 weeks post winter:2 weeks of winter vs. SPC -4 weeks post winter:8 weeks of winter      | 2.119  | 1.349  | 0.77    | 0.5277 | 6 |
| <b>192</b>                         | 8 weeks post winter:2 weeks of winter vs. SPC -8 weeks post winter:2 weeks of winter      | 2.119  | 1.225  | 0.8942  | 0.5277 | 6 |
| <b>193</b>                         | 8 weeks post winter:2 weeks of winter vs. SPC -8 weeks post winter:4 weeks of winter      | 2.119  | 1.349  | 0.77    | 0.5277 | 6 |
| <b>194</b>                         | 8 weeks post winter:2 weeks of winter vs. SPC -8 weeks post winter:8 weeks of winter      | 2.119  | 1.803  | 0.3157  | 0.5277 | 6 |
| <b>195</b>                         | 8 weeks post winter:4 weeks of winter vs. 8 weeks post winter:8 weeks of winter           | 3.182  | 6.52   | -3.337  | 0.5277 | 6 |
| <b>196</b>                         | 8 weeks post winter:4 weeks of winter vs. SPC -4 weeks post winter:2 weeks of winter      | 3.182  | 0.7625 | 2.42    | 0.5277 | 6 |
| <b>197</b>                         | 8 weeks post winter:4 weeks of winter vs. SPC -4 weeks post winter:4 weeks of winter      | 3.182  | 0.8806 | 2.302   | 0.5277 | 6 |
| <b>198</b>                         | 8 weeks post winter:4 weeks of winter vs. SPC -4 weeks post winter:8 weeks of winter      | 3.182  | 1.349  | 1.833   | 0.5277 | 6 |
| <b>199</b>                         | 8 weeks post winter:4 weeks of winter vs. SPC -8 weeks post winter:2 weeks of winter      | 3.182  | 1.225  | 1.958   | 0.5277 | 6 |
| <b>200</b>                         | 8 weeks post winter:4 weeks of winter vs. SPC -8 weeks post winter:4 weeks of winter      | 3.182  | 1.349  | 1.833   | 0.5277 | 6 |
| <b>201</b>                         | 8 weeks post winter:4 weeks of winter vs. SPC -8 weeks post winter:8 weeks of winter      | 3.182  | 1.803  | 1.379   | 0.5277 | 6 |
| <b>202</b>                         | 8 weeks post winter:8 weeks of winter vs. SPC -4 weeks post winter:2 weeks of winter      | 6.52   | 0.7625 | 5.757   | 0.5277 | 6 |
| <b>203</b>                         | 8 weeks post winter:8 weeks of winter vs. SPC -4 weeks post winter:4 weeks of winter      | 6.52   | 0.8806 | 5.639   | 0.5277 | 6 |
| <b>204</b>                         | 8 weeks post winter:8 weeks of winter vs. SPC -4 weeks post winter:8 weeks of winter      | 6.52   | 1.349  | 5.171   | 0.5277 | 6 |
| <b>205</b>                         | 8 weeks post winter:8 weeks of winter vs. SPC -8 weeks post winter:2 weeks of winter      | 6.52   | 1.225  | 5.295   | 0.5277 | 6 |
| <b>206</b>                         | 8 weeks post winter:8 weeks of winter vs. SPC -8 weeks post winter:4 weeks of winter      | 6.52   | 1.349  | 5.171   | 0.5277 | 6 |
| <b>207</b>                         | 8 weeks post winter:8 weeks of winter vs. SPC -8 weeks post winter:8 weeks of winter      | 6.52   | 1.803  | 4.717   | 0.5277 | 6 |
| <b>208</b>                         | SPC -4 weeks post winter:2 weeks of winter vs. SPC -4 weeks post winter:4 weeks of winter | 0.7625 | 0.8806 | -0.1181 | 0.5277 | 6 |
| <b>209</b>                         | SPC -4 weeks post winter:2 weeks of winter vs. SPC -4 weeks post winter:8 weeks of winter | 0.7625 | 1.349  | -0.5866 | 0.5277 | 6 |
| <b>210</b>                         | SPC -4 weeks post winter:2 weeks of winter vs. SPC -8 weeks post winter:2 weeks of winter | 0.7625 | 1.225  | -0.4623 | 0.5277 | 6 |

| <b>2way ANOVA</b><br>Multiple comparisons |                                                                                           |        |       |         |        |   |
|-------------------------------------------|-------------------------------------------------------------------------------------------|--------|-------|---------|--------|---|
| <b>211</b>                                | SPC -4 weeks post winter:2 weeks of winter vs. SPC -8 weeks post winter:4 weeks of winter | 0.7625 | 1.349 | -0.5866 | 0.5277 | 6 |
| <b>212</b>                                | SPC -4 weeks post winter:2 weeks of winter vs. SPC -8 weeks post winter:8 weeks of winter | 0.7625 | 1.803 | -1.041  | 0.5277 | 6 |
| <b>213</b>                                | SPC -4 weeks post winter:4 weeks of winter vs. SPC -4 weeks post winter:8 weeks of winter | 0.8806 | 1.349 | -0.4684 | 0.5277 | 6 |
| <b>214</b>                                | SPC -4 weeks post winter:4 weeks of winter vs. SPC -8 weeks post winter:2 weeks of winter | 0.8806 | 1.225 | -0.3442 | 0.5277 | 6 |
| <b>215</b>                                | SPC -4 weeks post winter:4 weeks of winter vs. SPC -8 weeks post winter:4 weeks of winter | 0.8806 | 1.349 | -0.4684 | 0.5277 | 6 |
| <b>216</b>                                | SPC -4 weeks post winter:4 weeks of winter vs. SPC -8 weeks post winter:8 weeks of winter | 0.8806 | 1.803 | -0.9227 | 0.5277 | 6 |
| <b>217</b>                                | SPC -4 weeks post winter:8 weeks of winter vs. SPC -8 weeks post winter:2 weeks of winter | 1.349  | 1.225 | 0.1242  | 0.5277 | 6 |
| <b>218</b>                                | SPC -4 weeks post winter:8 weeks of winter vs. SPC -8 weeks post winter:4 weeks of winter | 1.349  | 1.349 | 0       | 0.5277 | 6 |
| <b>219</b>                                | SPC -4 weeks post winter:8 weeks of winter vs. SPC -8 weeks post winter:8 weeks of winter | 1.349  | 1.803 | -0.4542 | 0.5277 | 6 |
| <b>220</b>                                | SPC -8 weeks post winter:2 weeks of winter vs. SPC -8 weeks post winter:4 weeks of winter | 1.225  | 1.349 | -0.1242 | 0.5277 | 6 |
| <b>221</b>                                | SPC -8 weeks post winter:2 weeks of winter vs. SPC -8 weeks post winter:8 weeks of winter | 1.225  | 1.803 | -0.5784 | 0.5277 | 6 |
| <b>222</b>                                | SPC -8 weeks post winter:4 weeks of winter vs. SPC -8 weeks post winter:8 weeks of winter | 1.349  | 1.803 | -0.4542 | 0.5277 | 6 |

|    |  |  |  |
|----|--|--|--|
|    |  |  |  |
|    |  |  |  |
|    |  |  |  |
| 1  |  |  |  |
| 2  |  |  |  |
| 3  |  |  |  |
| 4  |  |  |  |
| 5  |  |  |  |
| 6  |  |  |  |
| 7  |  |  |  |
| 8  |  |  |  |
| 9  |  |  |  |
| 10 |  |  |  |
| 11 |  |  |  |
| 12 |  |  |  |
| 13 |  |  |  |
| 14 |  |  |  |
| 15 |  |  |  |
| 16 |  |  |  |
| 17 |  |  |  |
| 18 |  |  |  |
| 19 |  |  |  |
| 20 |  |  |  |
| 21 |  |  |  |
| 22 |  |  |  |
| 23 |  |  |  |
| 24 |  |  |  |
| 25 |  |  |  |
| 26 |  |  |  |
| 27 |  |  |  |
| 28 |  |  |  |
| 29 |  |  |  |
| 30 |  |  |  |

|    |  |  |  |
|----|--|--|--|
|    |  |  |  |
|    |  |  |  |
|    |  |  |  |
| 31 |  |  |  |
| 32 |  |  |  |
| 33 |  |  |  |
| 34 |  |  |  |
| 35 |  |  |  |
| 36 |  |  |  |
| 37 |  |  |  |
| 38 |  |  |  |
| 39 |  |  |  |
| 40 |  |  |  |
| 41 |  |  |  |
| 42 |  |  |  |
| 43 |  |  |  |
| 44 |  |  |  |
| 45 |  |  |  |
| 46 |  |  |  |
| 47 |  |  |  |
| 48 |  |  |  |
| 49 |  |  |  |
| 50 |  |  |  |
| 51 |  |  |  |
| 52 |  |  |  |
| 53 |  |  |  |
| 54 |  |  |  |
| 55 |  |  |  |
| 56 |  |  |  |
| 57 |  |  |  |
| 58 |  |  |  |
| 59 |  |  |  |
| 60 |  |  |  |



|    |  |  |  |
|----|--|--|--|
|    |  |  |  |
|    |  |  |  |
|    |  |  |  |
| 61 |  |  |  |
| 62 |  |  |  |
| 63 |  |  |  |
| 64 |  |  |  |
| 65 |  |  |  |
| 66 |  |  |  |
| 67 |  |  |  |
| 68 |  |  |  |
| 69 |  |  |  |
| 70 |  |  |  |
| 71 |  |  |  |
| 72 |  |  |  |
| 73 |  |  |  |
| 74 |  |  |  |
| 75 |  |  |  |
| 76 |  |  |  |
| 77 |  |  |  |
| 78 |  |  |  |
| 79 |  |  |  |
| 80 |  |  |  |
| 81 |  |  |  |
| 82 |  |  |  |
| 83 |  |  |  |
| 84 |  |  |  |
| 85 |  |  |  |
| 86 |  |  |  |
| 87 |  |  |  |
| 88 |  |  |  |
| 89 |  |  |  |
| 90 |  |  |  |

|     |    |         |    |
|-----|----|---------|----|
|     |    |         |    |
|     |    |         |    |
|     |    |         |    |
| 91  |    |         |    |
| 92  |    |         |    |
| 93  |    |         |    |
| 94  |    |         |    |
| 95  |    |         |    |
| 96  |    |         |    |
| 97  |    |         |    |
| 98  |    |         |    |
| 99  |    |         |    |
| 100 |    |         |    |
| 101 |    |         |    |
| 102 |    |         |    |
| 103 |    |         |    |
| 104 |    |         |    |
| 105 |    |         |    |
| 106 |    |         |    |
| 107 |    |         |    |
| 108 |    |         |    |
| 109 |    |         |    |
| 110 |    |         |    |
| 111 |    |         |    |
| 112 |    |         |    |
| 113 |    |         |    |
| 114 |    |         |    |
| 115 |    |         |    |
| 116 | N2 | q       | DF |
| 117 |    |         |    |
| 118 | 6  | 0.1176  | 75 |
| 119 | 6  | 0.06434 | 75 |
| 120 | 6  | 3.613   | 75 |

|            |   |         |    |
|------------|---|---------|----|
|            |   |         |    |
|            |   |         |    |
|            |   |         |    |
| <b>121</b> | 6 | 3.611   | 75 |
| <b>122</b> | 6 | 10.62   | 75 |
| <b>123</b> | 6 | 3.255   | 75 |
| <b>124</b> | 6 | 6.105   | 75 |
| <b>125</b> | 6 | 15.05   | 75 |
| <b>126</b> | 6 | 0.3809  | 75 |
| <b>127</b> | 6 | 0.06434 | 75 |
| <b>128</b> | 6 | 1.191   | 75 |
| <b>129</b> | 6 | 0.8583  | 75 |
| <b>130</b> | 6 | 1.191   | 75 |
| <b>131</b> | 6 | 2.409   | 75 |
| <b>132</b> | 6 | 0.182   | 75 |
| <b>133</b> | 6 | 3.495   | 75 |
| <b>134</b> | 6 | 3.493   | 75 |
| <b>135</b> | 6 | 10.5    | 75 |
| <b>136</b> | 6 | 3.137   | 75 |
| <b>137</b> | 6 | 5.987   | 75 |
| <b>138</b> | 6 | 14.93   | 75 |
| <b>139</b> | 6 | 0.4985  | 75 |
| <b>140</b> | 6 | 0.182   | 75 |
| <b>141</b> | 6 | 1.074   | 75 |
| <b>142</b> | 6 | 0.7407  | 75 |
| <b>143</b> | 6 | 1.074   | 75 |
| <b>144</b> | 6 | 2.291   | 75 |
| <b>145</b> | 6 | 3.677   | 75 |
| <b>146</b> | 6 | 3.675   | 75 |
| <b>147</b> | 6 | 10.68   | 75 |
| <b>148</b> | 6 | 3.319   | 75 |
| <b>149</b> | 6 | 6.169   | 75 |
| <b>150</b> | 6 | 15.11   | 75 |

|            |   |          |    |
|------------|---|----------|----|
|            |   |          |    |
|            |   |          |    |
|            |   |          |    |
| <b>151</b> | 6 | 0.3165   | 75 |
| <b>152</b> | 6 | 0        | 75 |
| <b>153</b> | 6 | 1.256    | 75 |
| <b>154</b> | 6 | 0.9226   | 75 |
| <b>155</b> | 6 | 1.256    | 75 |
| <b>156</b> | 6 | 2.473    | 75 |
| <b>157</b> | 6 | 0.001638 | 75 |
| <b>158</b> | 6 | 7.004    | 75 |
| <b>159</b> | 6 | 0.3578   | 75 |
| <b>160</b> | 6 | 2.492    | 75 |
| <b>161</b> | 6 | 11.44    | 75 |
| <b>162</b> | 6 | 3.993    | 75 |
| <b>163</b> | 6 | 3.677    | 75 |
| <b>164</b> | 6 | 2.421    | 75 |
| <b>165</b> | 6 | 2.754    | 75 |
| <b>166</b> | 6 | 2.421    | 75 |
| <b>167</b> | 6 | 1.204    | 75 |
| <b>168</b> | 6 | 7.006    | 75 |
| <b>169</b> | 6 | 0.3561   | 75 |
| <b>170</b> | 6 | 2.494    | 75 |
| <b>171</b> | 6 | 11.44    | 75 |
| <b>172</b> | 6 | 3.992    | 75 |
| <b>173</b> | 6 | 3.675    | 75 |
| <b>174</b> | 6 | 2.42     | 75 |
| <b>175</b> | 6 | 2.753    | 75 |
| <b>176</b> | 6 | 2.42     | 75 |
| <b>177</b> | 6 | 1.202    | 75 |
| <b>178</b> | 6 | 7.362    | 75 |
| <b>179</b> | 6 | 4.512    | 75 |
| <b>180</b> | 6 | 4.433    | 75 |

| <b>181</b> | 6 | 11     | 75 |
|------------|---|--------|----|
| <b>182</b> | 6 | 10.68  | 75 |
| <b>183</b> | 6 | 9.426  | 75 |
| <b>184</b> | 6 | 9.758  | 75 |
| <b>185</b> | 6 | 9.426  | 75 |
| <b>186</b> | 6 | 8.208  | 75 |
| <b>187</b> | 6 | 2.85   | 75 |
| <b>188</b> | 6 | 11.79  | 75 |
| <b>189</b> | 6 | 3.636  | 75 |
| <b>190</b> | 6 | 3.319  | 75 |
| <b>191</b> | 6 | 2.064  | 75 |
| <b>192</b> | 6 | 2.397  | 75 |
| <b>193</b> | 6 | 2.064  | 75 |
| <b>194</b> | 6 | 0.8462 | 75 |
| <b>195</b> | 6 | 8.945  | 75 |
| <b>196</b> | 6 | 6.486  | 75 |
| <b>197</b> | 6 | 6.169  | 75 |
| <b>198</b> | 6 | 4.914  | 75 |
| <b>199</b> | 6 | 5.247  | 75 |
| <b>200</b> | 6 | 4.914  | 75 |
| <b>201</b> | 6 | 3.696  | 75 |
| <b>202</b> | 6 | 15.43  | 75 |
| <b>203</b> | 6 | 15.11  | 75 |
| <b>204</b> | 6 | 13.86  | 75 |
| <b>205</b> | 6 | 14.19  | 75 |
| <b>206</b> | 6 | 13.86  | 75 |
| <b>207</b> | 6 | 12.64  | 75 |
| <b>208</b> | 6 | 0.3165 | 75 |
| <b>209</b> | 6 | 1.572  | 75 |
| <b>210</b> | 6 | 1.239  | 75 |

|            |   |        |    |
|------------|---|--------|----|
|            |   |        |    |
|            |   |        |    |
|            |   |        |    |
| <b>211</b> | 6 | 1.572  | 75 |
| <b>212</b> | 6 | 2.789  | 75 |
| <b>213</b> | 6 | 1.256  | 75 |
| <b>214</b> | 6 | 0.9226 | 75 |
| <b>215</b> | 6 | 1.256  | 75 |
| <b>216</b> | 6 | 2.473  | 75 |
| <b>217</b> | 6 | 0.3329 | 75 |
| <b>218</b> | 6 | 0      | 75 |
| <b>219</b> | 6 | 1.217  | 75 |
| <b>220</b> | 6 | 0.3329 | 75 |
| <b>221</b> | 6 | 1.55   | 75 |
| <b>222</b> | 6 | 1.217  | 75 |

| 2way ANOVA<br>Tabular results |                          |                      |         |                 |                   |          |
|-------------------------------|--------------------------|----------------------|---------|-----------------|-------------------|----------|
| 1                             | Table Analyzed           | FKBP5                |         |                 |                   |          |
| 2                             |                          |                      |         |                 |                   |          |
| 3                             | Two-way ANOVA            | Ordinary             |         |                 |                   |          |
| 4                             | Alpha                    | 0.05                 |         |                 |                   |          |
| 5                             |                          |                      |         |                 |                   |          |
| 6                             | Source of Variation      | % of total variation | P value | P value summary | Significant?      |          |
| 7                             | Interaction              | 19.42                | 0.0004  | ***             | Yes               |          |
| 8                             | Time post-winter         | 15.81                | 0.0001  | ***             | Yes               |          |
| 9                             | Treatment                | 20.52                | <0.0001 | ****            | Yes               |          |
| 10                            |                          |                      |         |                 |                   |          |
| 11                            | ANOVA table              | SS                   | DF      | MS              | F (DFn, DFd)      | P value  |
| 12                            | Interaction              | 13.33                | 8       | 1.667           | F (8, 75) = 4.114 | P=0.0004 |
| 13                            | Time post-winter         | 10.86                | 4       | 2.714           | F (4, 75) = 6.699 | P=0.0001 |
| 14                            | Treatment                | 14.09                | 2       | 7.045           | F (2, 75) = 17.39 | P<0.0001 |
| 15                            | Residual                 | 30.38                | 75      | 0.4051          |                   |          |
| 16                            |                          |                      |         |                 |                   |          |
| 17                            | Number of missing values | 0                    |         |                 |                   |          |

| 2way ANOVA<br>Multiple comparisons |                                                                                |            |                    |              |         |                  |
|------------------------------------|--------------------------------------------------------------------------------|------------|--------------------|--------------|---------|------------------|
| 1                                  | Compare cell means regardless of rows and columns                              |            |                    |              |         |                  |
| 2                                  |                                                                                |            |                    |              |         |                  |
| 3                                  | Number of families                                                             | 1          |                    |              |         |                  |
| 4                                  | Number of comparisons per family                                               | 105        |                    |              |         |                  |
| 5                                  | Alpha                                                                          | 0.05       |                    |              |         |                  |
| 6                                  |                                                                                |            |                    |              |         |                  |
| 7                                  | Tukey's multiple comparisons test                                              | Mean Diff. | 95.00% CI of diff. | Significant? | Summary | Adjusted P Value |
| 8                                  |                                                                                |            |                    |              |         |                  |
| 9                                  | End of winter:2 weeks of winter vs. End of winter:4 weeks of winter            | 0.2969     | -0.9919 to 1.586   | No           | ns      | >0.9999          |
| 10                                 | End of winter:2 weeks of winter vs. End of winter:8 weeks of winter            | -0.3618    | -1.651 to 0.927    | No           | ns      | 0.9996           |
| 11                                 | End of winter:2 weeks of winter vs. 4 weeks post winter:2 weeks of winter      | 0.1339     | -1.155 to 1.423    | No           | ns      | >0.9999          |
| 12                                 | End of winter:2 weeks of winter vs. 4 weeks post winter:4 weeks of winter      | -0.6927    | -1.981 to 0.5961   | No           | ns      | 0.8530           |
| 13                                 | End of winter:2 weeks of winter vs. 4 weeks post winter:8 weeks of winter      | -2.14      | -3.429 to -0.8512  | Yes          | ****    | <0.0001          |
| 14                                 | End of winter:2 weeks of winter vs. 8 weeks post winter:2 weeks of winter      | 0.162      | -1.127 to 1.451    | No           | ns      | >0.9999          |
| 15                                 | End of winter:2 weeks of winter vs. 8 weeks post winter:4 weeks of winter      | -0.914     | -2.203 to 0.3747   | No           | ns      | 0.4618           |
| 16                                 | End of winter:2 weeks of winter vs. 8 weeks post winter:8 weeks of winter      | -1.605     | -2.893 to -0.3159  | Yes          | **      | 0.0034           |
| 17                                 | End of winter:2 weeks of winter vs. SPC -4 weeks post winter:2 weeks of winter | 0.07709    | -1.212 to 1.366    | No           | ns      | >0.9999          |
| 18                                 | End of winter:2 weeks of winter vs. SPC -4 weeks post winter:4 weeks of winter | -0.3618    | -1.651 to 0.927    | No           | ns      | 0.9996           |
| 19                                 | End of winter:2 weeks of winter vs. SPC -4 weeks post winter:8 weeks of winter | -0.21      | -1.499 to 1.079    | No           | ns      | >0.9999          |
| 20                                 | End of winter:2 weeks of winter vs. SPC -8 weeks post winter:2 weeks of winter | -0.2662    | -1.555 to 1.023    | No           | ns      | >0.9999          |
| 21                                 | End of winter:2 weeks of winter vs. SPC -8 weeks post winter:4 weeks of winter | -0.21      | -1.499 to 1.079    | No           | ns      | >0.9999          |
| 22                                 | End of winter:2 weeks of winter vs. SPC -8 weeks post winter:8 weeks of winter | -0.398     | -1.687 to 0.8907   | No           | ns      | 0.9988           |
| 23                                 | End of winter:4 weeks of winter vs. End of winter:8 weeks of winter            | -0.6587    | -1.947 to 0.6301   | No           | ns      | 0.8937           |
| 24                                 | End of winter:4 weeks of winter vs. 4 weeks post winter:2 weeks of winter      | -0.163     | -1.452 to 1.126    | No           | ns      | >0.9999          |
| 25                                 | End of winter:4 weeks of winter vs. 4 weeks post winter:4 weeks of winter      | -0.9896    | -2.278 to 0.2992   | No           | ns      | 0.3295           |
| 26                                 | End of winter:4 weeks of winter vs. 4 weeks post winter:8 weeks of winter      | -2.437     | -3.726 to -1.148   | Yes          | ****    | <0.0001          |
| 27                                 | End of winter:4 weeks of winter vs. 8 weeks post winter:2 weeks of winter      | -0.135     | -1.424 to 1.154    | No           | ns      | >0.9999          |
| 28                                 | End of winter:4 weeks of winter vs. 8 weeks post winter:4 weeks of winter      | -1.211     | -2.5 to 0.07783    | No           | ns      | 0.0880           |
| 29                                 | End of winter:4 weeks of winter vs. 8 weeks post winter:8 weeks of winter      | -1.902     | -3.19 to -0.6129   | Yes          | ***     | 0.0002           |
| 30                                 | End of winter:4 weeks of winter vs. SPC -4 weeks post winter:2 weeks of winter | -0.2198    | -1.509 to 1.069    | No           | ns      | >0.9999          |



| 2way ANOVA<br>Multiple comparisons |                                                                                      |          |                   |     |      |         |
|------------------------------------|--------------------------------------------------------------------------------------|----------|-------------------|-----|------|---------|
| 31                                 | End of winter:4 weeks of winter vs. SPC -4 weeks post winter:4 weeks of winter       | -0.6587  | -1.947 to 0.6301  | No  | ns   | 0.8937  |
| 32                                 | End of winter:4 weeks of winter vs. SPC -4 weeks post winter:8 weeks of winter       | -0.5069  | -1.796 to 0.7819  | No  | ns   | 0.9868  |
| 33                                 | End of winter:4 weeks of winter vs. SPC -8 weeks post winter:2 weeks of winter       | -0.5631  | -1.852 to 0.7256  | No  | ns   | 0.9671  |
| 34                                 | End of winter:4 weeks of winter vs. SPC -8 weeks post winter:4 weeks of winter       | -0.5069  | -1.796 to 0.7819  | No  | ns   | 0.9868  |
| 35                                 | End of winter:4 weeks of winter vs. SPC -8 weeks post winter:8 weeks of winter       | -0.6949  | -1.984 to 0.5938  | No  | ns   | 0.8499  |
| 36                                 | End of winter:8 weeks of winter vs. 4 weeks post winter:2 weeks of winter            | 0.4957   | -0.793 to 1.784   | No  | ns   | 0.9892  |
| 37                                 | End of winter:8 weeks of winter vs. 4 weeks post winter:4 weeks of winter            | -0.3309  | -1.62 to 0.9579   | No  | ns   | 0.9999  |
| 38                                 | End of winter:8 weeks of winter vs. 4 weeks post winter:8 weeks of winter            | -1.778   | -3.067 to -0.4894 | Yes | ***  | 0.0006  |
| 39                                 | End of winter:8 weeks of winter vs. 8 weeks post winter:2 weeks of winter            | 0.5237   | -0.765 to 1.812   | No  | ns   | 0.9823  |
| 40                                 | End of winter:8 weeks of winter vs. 8 weeks post winter:4 weeks of winter            | -0.5522  | -1.841 to 0.7365  | No  | ns   | 0.9720  |
| 41                                 | End of winter:8 weeks of winter vs. 8 weeks post winter:8 weeks of winter            | -1.243   | -2.532 to 0.04583 | No  | ns   | 0.0701  |
| 42                                 | End of winter:8 weeks of winter vs. SPC -4 weeks post winter:2 weeks of winter       | 0.4389   | -0.8499 to 1.728  | No  | ns   | 0.9967  |
| 43                                 | End of winter:8 weeks of winter vs. SPC -4 weeks post winter:4 weeks of winter       | 0        | -1.289 to 1.289   | No  | ns   | >0.9999 |
| 44                                 | End of winter:8 weeks of winter vs. SPC -4 weeks post winter:8 weeks of winter       | 0.1518   | -1.137 to 1.441   | No  | ns   | >0.9999 |
| 45                                 | End of winter:8 weeks of winter vs. SPC -8 weeks post winter:2 weeks of winter       | 0.09557  | -1.193 to 1.384   | No  | ns   | >0.9999 |
| 46                                 | End of winter:8 weeks of winter vs. SPC -8 weeks post winter:4 weeks of winter       | 0.1518   | -1.137 to 1.441   | No  | ns   | >0.9999 |
| 47                                 | End of winter:8 weeks of winter vs. SPC -8 weeks post winter:8 weeks of winter       | -0.03626 | -1.325 to 1.253   | No  | ns   | >0.9999 |
| 48                                 | 4 weeks post winter:2 weeks of winter vs. 4 weeks post winter:4 weeks of winter      | -0.8266  | -2.115 to 0.4622  | No  | ns   | 0.6295  |
| 49                                 | 4 weeks post winter:2 weeks of winter vs. 4 weeks post winter:8 weeks of winter      | -2.274   | -3.563 to -0.9851 | Yes | **** | <0.0001 |
| 50                                 | 4 weeks post winter:2 weeks of winter vs. 8 weeks post winter:2 weeks of winter      | 0.02801  | -1.261 to 1.317   | No  | ns   | >0.9999 |
| 51                                 | 4 weeks post winter:2 weeks of winter vs. 8 weeks post winter:4 weeks of winter      | -1.048   | -2.337 to 0.2408  | No  | ns   | 0.2434  |
| 52                                 | 4 weeks post winter:2 weeks of winter vs. 8 weeks post winter:8 weeks of winter      | -1.739   | -3.027 to -0.4499 | Yes | ***  | 0.0009  |
| 53                                 | 4 weeks post winter:2 weeks of winter vs. SPC -4 weeks post winter:2 weeks of winter | -0.05685 | -1.346 to 1.232   | No  | ns   | >0.9999 |
| 54                                 | 4 weeks post winter:2 weeks of winter vs. SPC -4 weeks post winter:4 weeks of winter | -0.4957  | -1.784 to 0.793   | No  | ns   | 0.9892  |
| 55                                 | 4 weeks post winter:2 weeks of winter vs. SPC -4 weeks post winter:8 weeks of winter | -0.3439  | -1.633 to 0.9448  | No  | ns   | 0.9998  |
| 56                                 | 4 weeks post winter:2 weeks of winter vs. SPC -8 weeks post winter:2 weeks of winter | -0.4001  | -1.689 to 0.8886  | No  | ns   | 0.9987  |
| 57                                 | 4 weeks post winter:2 weeks of winter vs. SPC -8 weeks post winter:4 weeks of winter | -0.3439  | -1.633 to 0.9448  | No  | ns   | 0.9998  |
| 58                                 | 4 weeks post winter:2 weeks of winter vs. SPC -8 weeks post winter:8 weeks of winter | -0.532   | -1.821 to 0.7568  | No  | ns   | 0.9797  |
| 59                                 | 4 weeks post winter:4 weeks of winter vs. 4 weeks post winter:8 weeks of winter      | -1.447   | -2.736 to -0.1585 | Yes | *    | 0.0139  |
| 60                                 | 4 weeks post winter:4 weeks of winter vs. 8 weeks post winter:2 weeks of winter      | 0.8546   | -0.4342 to 2.143  | No  | ns   | 0.5755  |

| 2way ANOVA<br>Multiple comparisons |                                                                                      |          |                   |     |      |         |
|------------------------------------|--------------------------------------------------------------------------------------|----------|-------------------|-----|------|---------|
| 61                                 | 4 weeks post winter:4 weeks of winter vs. 8 weeks post winter:4 weeks of winter      | -0.2214  | -1.51 to 1.067    | No  | ns   | >0.9999 |
| 62                                 | 4 weeks post winter:4 weeks of winter vs. 8 weeks post winter:8 weeks of winter      | -0.9121  | -2.201 to 0.3767  | No  | ns   | 0.4655  |
| 63                                 | 4 weeks post winter:4 weeks of winter vs. SPC -4 weeks post winter:2 weeks of winter | 0.7697   | -0.519 to 2.059   | No  | ns   | 0.7340  |
| 64                                 | 4 weeks post winter:4 weeks of winter vs. SPC -4 weeks post winter:4 weeks of winter | 0.3309   | -0.9579 to 1.62   | No  | ns   | 0.9999  |
| 65                                 | 4 weeks post winter:4 weeks of winter vs. SPC -4 weeks post winter:8 weeks of winter | 0.4827   | -0.8061 to 1.771  | No  | ns   | 0.9916  |
| 66                                 | 4 weeks post winter:4 weeks of winter vs. SPC -8 weeks post winter:2 weeks of winter | 0.4264   | -0.8623 to 1.715  | No  | ns   | 0.9975  |
| 67                                 | 4 weeks post winter:4 weeks of winter vs. SPC -8 weeks post winter:4 weeks of winter | 0.4827   | -0.8061 to 1.771  | No  | ns   | 0.9916  |
| 68                                 | 4 weeks post winter:4 weeks of winter vs. SPC -8 weeks post winter:8 weeks of winter | 0.2946   | -0.9941 to 1.583  | No  | ns   | >0.9999 |
| 69                                 | 4 weeks post winter:8 weeks of winter vs. 8 weeks post winter:2 weeks of winter      | 2.302    | 1.013 to 3.591    | Yes | **** | <0.0001 |
| 70                                 | 4 weeks post winter:8 weeks of winter vs. 8 weeks post winter:4 weeks of winter      | 1.226    | -0.06285 to 2.515 | No  | ns   | 0.0792  |
| 71                                 | 4 weeks post winter:8 weeks of winter vs. 8 weeks post winter:8 weeks of winter      | 0.5352   | -0.7535 to 1.824  | No  | ns   | 0.9786  |
| 72                                 | 4 weeks post winter:8 weeks of winter vs. SPC -4 weeks post winter:2 weeks of winter | 2.217    | 0.9283 to 3.506   | Yes | **** | <0.0001 |
| 73                                 | 4 weeks post winter:8 weeks of winter vs. SPC -4 weeks post winter:4 weeks of winter | 1.778    | 0.4894 to 3.067   | Yes | ***  | 0.0006  |
| 74                                 | 4 weeks post winter:8 weeks of winter vs. SPC -4 weeks post winter:8 weeks of winter | 1.93     | 0.6412 to 3.219   | Yes | ***  | 0.0001  |
| 75                                 | 4 weeks post winter:8 weeks of winter vs. SPC -8 weeks post winter:2 weeks of winter | 1.874    | 0.585 to 3.162    | Yes | ***  | 0.0002  |
| 76                                 | 4 weeks post winter:8 weeks of winter vs. SPC -8 weeks post winter:4 weeks of winter | 1.93     | 0.6412 to 3.219   | Yes | ***  | 0.0001  |
| 77                                 | 4 weeks post winter:8 weeks of winter vs. SPC -8 weeks post winter:8 weeks of winter | 1.742    | 0.4531 to 3.031   | Yes | ***  | 0.0009  |
| 78                                 | 8 weeks post winter:2 weeks of winter vs. 8 weeks post winter:4 weeks of winter      | -1.076   | -2.365 to 0.2128  | No  | ns   | 0.2079  |
| 79                                 | 8 weeks post winter:2 weeks of winter vs. 8 weeks post winter:8 weeks of winter      | -1.767   | -3.055 to -0.4779 | Yes | ***  | 0.0007  |
| 80                                 | 8 weeks post winter:2 weeks of winter vs. SPC -4 weeks post winter:2 weeks of winter | -0.08486 | -1.374 to 1.204   | No  | ns   | >0.9999 |
| 81                                 | 8 weeks post winter:2 weeks of winter vs. SPC -4 weeks post winter:4 weeks of winter | -0.5237  | -1.812 to 0.765   | No  | ns   | 0.9823  |
| 82                                 | 8 weeks post winter:2 weeks of winter vs. SPC -4 weeks post winter:8 weeks of winter | -0.372   | -1.661 to 0.9168  | No  | ns   | 0.9994  |
| 83                                 | 8 weeks post winter:2 weeks of winter vs. SPC -8 weeks post winter:2 weeks of winter | -0.4282  | -1.717 to 0.8606  | No  | ns   | 0.9974  |
| 84                                 | 8 weeks post winter:2 weeks of winter vs. SPC -8 weeks post winter:4 weeks of winter | -0.372   | -1.661 to 0.9168  | No  | ns   | 0.9994  |
| 85                                 | 8 weeks post winter:2 weeks of winter vs. SPC -8 weeks post winter:8 weeks of winter | -0.56    | -1.849 to 0.7288  | No  | ns   | 0.9686  |
| 86                                 | 8 weeks post winter:4 weeks of winter vs. 8 weeks post winter:8 weeks of winter      | -0.6907  | -1.979 to 0.5981  | No  | ns   | 0.8555  |
| 87                                 | 8 weeks post winter:4 weeks of winter vs. SPC -4 weeks post winter:2 weeks of winter | 0.9911   | -0.2976 to 2.28   | No  | ns   | 0.3270  |
| 88                                 | 8 weeks post winter:4 weeks of winter vs. SPC -4 weeks post winter:4 weeks of winter | 0.5522   | -0.7365 to 1.841  | No  | ns   | 0.9720  |
| 89                                 | 8 weeks post winter:4 weeks of winter vs. SPC -4 weeks post winter:8 weeks of winter | 0.704    | -0.5847 to 1.993  | No  | ns   | 0.8376  |
| 90                                 | 8 weeks post winter:4 weeks of winter vs. SPC -8 weeks post winter:2 weeks of winter | 0.6478   | -0.6409 to 1.937  | No  | ns   | 0.9050  |

| 2way ANOVA<br>Multiple comparisons |                                                                                           |          |                   |            |             |         |
|------------------------------------|-------------------------------------------------------------------------------------------|----------|-------------------|------------|-------------|---------|
| 91                                 | 8 weeks post winter:4 weeks of winter vs. SPC -8 weeks post winter:4 weeks of winter      | 0.704    | -0.5847 to 1.993  | No         | ns          | 0.8376  |
| 92                                 | 8 weeks post winter:4 weeks of winter vs. SPC -8 weeks post winter:8 weeks of winter      | 0.516    | -0.7728 to 1.805  | No         | ns          | 0.9845  |
| 93                                 | 8 weeks post winter:8 weeks of winter vs. SPC -4 weeks post winter:2 weeks of winter      | 1.682    | 0.393 to 2.971    | Yes        | **          | 0.0016  |
| 94                                 | 8 weeks post winter:8 weeks of winter vs. SPC -4 weeks post winter:4 weeks of winter      | 1.243    | -0.04583 to 2.532 | No         | ns          | 0.0701  |
| 95                                 | 8 weeks post winter:8 weeks of winter vs. SPC -4 weeks post winter:8 weeks of winter      | 1.395    | 0.1059 to 2.683   | Yes        | *           | 0.0216  |
| 96                                 | 8 weeks post winter:8 weeks of winter vs. SPC -8 weeks post winter:2 weeks of winter      | 1.339    | 0.04974 to 2.627  | Yes        | *           | 0.0341  |
| 97                                 | 8 weeks post winter:8 weeks of winter vs. SPC -8 weeks post winter:4 weeks of winter      | 1.395    | 0.1059 to 2.683   | Yes        | *           | 0.0216  |
| 98                                 | 8 weeks post winter:8 weeks of winter vs. SPC -8 weeks post winter:8 weeks of winter      | 1.207    | -0.08209 to 2.495 | No         | ns          | 0.0906  |
| 99                                 | SPC -4 weeks post winter:2 weeks of winter vs. SPC -4 weeks post winter:4 weeks of winter | -0.4389  | -1.728 to 0.8499  | No         | ns          | 0.9967  |
| 100                                | SPC -4 weeks post winter:2 weeks of winter vs. SPC -4 weeks post winter:8 weeks of winter | -0.2871  | -1.576 to 1.002   | No         | ns          | >0.9999 |
| 101                                | SPC -4 weeks post winter:2 weeks of winter vs. SPC -8 weeks post winter:2 weeks of winter | -0.3433  | -1.632 to 0.9455  | No         | ns          | 0.9998  |
| 102                                | SPC -4 weeks post winter:2 weeks of winter vs. SPC -8 weeks post winter:4 weeks of winter | -0.2871  | -1.576 to 1.002   | No         | ns          | >0.9999 |
| 103                                | SPC -4 weeks post winter:2 weeks of winter vs. SPC -8 weeks post winter:8 weeks of winter | -0.4751  | -1.764 to 0.8136  | No         | ns          | 0.9928  |
| 104                                | SPC -4 weeks post winter:4 weeks of winter vs. SPC -4 weeks post winter:8 weeks of winter | 0.1518   | -1.137 to 1.441   | No         | ns          | >0.9999 |
| 105                                | SPC -4 weeks post winter:4 weeks of winter vs. SPC -8 weeks post winter:2 weeks of winter | 0.09557  | -1.193 to 1.384   | No         | ns          | >0.9999 |
| 106                                | SPC -4 weeks post winter:4 weeks of winter vs. SPC -8 weeks post winter:4 weeks of winter | 0.1518   | -1.137 to 1.441   | No         | ns          | >0.9999 |
| 107                                | SPC -4 weeks post winter:4 weeks of winter vs. SPC -8 weeks post winter:8 weeks of winter | -0.03626 | -1.325 to 1.253   | No         | ns          | >0.9999 |
| 108                                | SPC -4 weeks post winter:8 weeks of winter vs. SPC -8 weeks post winter:2 weeks of winter | -0.05621 | -1.345 to 1.233   | No         | ns          | >0.9999 |
| 109                                | SPC -4 weeks post winter:8 weeks of winter vs. SPC -8 weeks post winter:4 weeks of winter | 0        | -1.289 to 1.289   | No         | ns          | >0.9999 |
| 110                                | SPC -4 weeks post winter:8 weeks of winter vs. SPC -8 weeks post winter:8 weeks of winter | -0.188   | -1.477 to 1.101   | No         | ns          | >0.9999 |
| 111                                | SPC -8 weeks post winter:2 weeks of winter vs. SPC -8 weeks post winter:4 weeks of winter | 0.05621  | -1.233 to 1.345   | No         | ns          | >0.9999 |
| 112                                | SPC -8 weeks post winter:2 weeks of winter vs. SPC -8 weeks post winter:8 weeks of winter | -0.1318  | -1.421 to 1.157   | No         | ns          | >0.9999 |
| 113                                | SPC -8 weeks post winter:4 weeks of winter vs. SPC -8 weeks post winter:8 weeks of winter | -0.188   | -1.477 to 1.101   | No         | ns          | >0.9999 |
| 114                                |                                                                                           |          |                   |            |             |         |
| 115                                |                                                                                           |          |                   |            |             |         |
| 116                                | Test details                                                                              | Mean 1   | Mean 2            | Mean Diff. | SE of diff. | N1      |
| 117                                |                                                                                           |          |                   |            |             |         |
| 118                                | End of winter:2 weeks of winter vs. End of winter:4 weeks of winter                       | 1.041    | 0.7437            | 0.2969     | 0.3675      | 6       |
| 119                                | End of winter:2 weeks of winter vs. End of winter:8 weeks of winter                       | 1.041    | 1.402             | -0.3618    | 0.3675      | 6       |
| 120                                | End of winter:2 weeks of winter vs. 4 weeks post winter:2 weeks of winter                 | 1.041    | 0.9066            | 0.1339     | 0.3675      | 6       |

| 2way ANOVA<br>Multiple comparisons |                                                                                |        |        |         |        |   |
|------------------------------------|--------------------------------------------------------------------------------|--------|--------|---------|--------|---|
| <b>121</b>                         | End of winter:2 weeks of winter vs. 4 weeks post winter:4 weeks of winter      | 1.041  | 1.733  | -0.6927 | 0.3675 | 6 |
| <b>122</b>                         | End of winter:2 weeks of winter vs. 4 weeks post winter:8 weeks of winter      | 1.041  | 3.181  | -2.14   | 0.3675 | 6 |
| <b>123</b>                         | End of winter:2 weeks of winter vs. 8 weeks post winter:2 weeks of winter      | 1.041  | 0.8786 | 0.162   | 0.3675 | 6 |
| <b>124</b>                         | End of winter:2 weeks of winter vs. 8 weeks post winter:4 weeks of winter      | 1.041  | 1.955  | -0.914  | 0.3675 | 6 |
| <b>125</b>                         | End of winter:2 weeks of winter vs. 8 weeks post winter:8 weeks of winter      | 1.041  | 2.645  | -1.605  | 0.3675 | 6 |
| <b>126</b>                         | End of winter:2 weeks of winter vs. SPC -4 weeks post winter:2 weeks of winter | 1.041  | 0.9635 | 0.07709 | 0.3675 | 6 |
| <b>127</b>                         | End of winter:2 weeks of winter vs. SPC -4 weeks post winter:4 weeks of winter | 1.041  | 1.402  | -0.3618 | 0.3675 | 6 |
| <b>128</b>                         | End of winter:2 weeks of winter vs. SPC -4 weeks post winter:8 weeks of winter | 1.041  | 1.251  | -0.21   | 0.3675 | 6 |
| <b>129</b>                         | End of winter:2 weeks of winter vs. SPC -8 weeks post winter:2 weeks of winter | 1.041  | 1.307  | -0.2662 | 0.3675 | 6 |
| <b>130</b>                         | End of winter:2 weeks of winter vs. SPC -8 weeks post winter:4 weeks of winter | 1.041  | 1.251  | -0.21   | 0.3675 | 6 |
| <b>131</b>                         | End of winter:2 weeks of winter vs. SPC -8 weeks post winter:8 weeks of winter | 1.041  | 1.439  | -0.398  | 0.3675 | 6 |
| <b>132</b>                         | End of winter:4 weeks of winter vs. End of winter:8 weeks of winter            | 0.7437 | 1.402  | -0.6587 | 0.3675 | 6 |
| <b>133</b>                         | End of winter:4 weeks of winter vs. 4 weeks post winter:2 weeks of winter      | 0.7437 | 0.9066 | -0.163  | 0.3675 | 6 |
| <b>134</b>                         | End of winter:4 weeks of winter vs. 4 weeks post winter:4 weeks of winter      | 0.7437 | 1.733  | -0.9896 | 0.3675 | 6 |
| <b>135</b>                         | End of winter:4 weeks of winter vs. 4 weeks post winter:8 weeks of winter      | 0.7437 | 3.181  | -2.437  | 0.3675 | 6 |
| <b>136</b>                         | End of winter:4 weeks of winter vs. 8 weeks post winter:2 weeks of winter      | 0.7437 | 0.8786 | -0.135  | 0.3675 | 6 |
| <b>137</b>                         | End of winter:4 weeks of winter vs. 8 weeks post winter:4 weeks of winter      | 0.7437 | 1.955  | -1.211  | 0.3675 | 6 |
| <b>138</b>                         | End of winter:4 weeks of winter vs. 8 weeks post winter:8 weeks of winter      | 0.7437 | 2.645  | -1.902  | 0.3675 | 6 |
| <b>139</b>                         | End of winter:4 weeks of winter vs. SPC -4 weeks post winter:2 weeks of winter | 0.7437 | 0.9635 | -0.2198 | 0.3675 | 6 |
| <b>140</b>                         | End of winter:4 weeks of winter vs. SPC -4 weeks post winter:4 weeks of winter | 0.7437 | 1.402  | -0.6587 | 0.3675 | 6 |
| <b>141</b>                         | End of winter:4 weeks of winter vs. SPC -4 weeks post winter:8 weeks of winter | 0.7437 | 1.251  | -0.5069 | 0.3675 | 6 |
| <b>142</b>                         | End of winter:4 weeks of winter vs. SPC -8 weeks post winter:2 weeks of winter | 0.7437 | 1.307  | -0.5631 | 0.3675 | 6 |
| <b>143</b>                         | End of winter:4 weeks of winter vs. SPC -8 weeks post winter:4 weeks of winter | 0.7437 | 1.251  | -0.5069 | 0.3675 | 6 |
| <b>144</b>                         | End of winter:4 weeks of winter vs. SPC -8 weeks post winter:8 weeks of winter | 0.7437 | 1.439  | -0.6949 | 0.3675 | 6 |
| <b>145</b>                         | End of winter:8 weeks of winter vs. 4 weeks post winter:2 weeks of winter      | 1.402  | 0.9066 | 0.4957  | 0.3675 | 6 |
| <b>146</b>                         | End of winter:8 weeks of winter vs. 4 weeks post winter:4 weeks of winter      | 1.402  | 1.733  | -0.3309 | 0.3675 | 6 |
| <b>147</b>                         | End of winter:8 weeks of winter vs. 4 weeks post winter:8 weeks of winter      | 1.402  | 3.181  | -1.778  | 0.3675 | 6 |
| <b>148</b>                         | End of winter:8 weeks of winter vs. 8 weeks post winter:2 weeks of winter      | 1.402  | 0.8786 | 0.5237  | 0.3675 | 6 |
| <b>149</b>                         | End of winter:8 weeks of winter vs. 8 weeks post winter:4 weeks of winter      | 1.402  | 1.955  | -0.5522 | 0.3675 | 6 |
| <b>150</b>                         | End of winter:8 weeks of winter vs. 8 weeks post winter:8 weeks of winter      | 1.402  | 2.645  | -1.243  | 0.3675 | 6 |

| 2way ANOVA<br>Multiple comparisons |                                                                                      |        |        |          |        |   |
|------------------------------------|--------------------------------------------------------------------------------------|--------|--------|----------|--------|---|
| 151                                | End of winter:8 weeks of winter vs. SPC -4 weeks post winter:2 weeks of winter       | 1.402  | 0.9635 | 0.4389   | 0.3675 | 6 |
| 152                                | End of winter:8 weeks of winter vs. SPC -4 weeks post winter:4 weeks of winter       | 1.402  | 1.402  | 0        | 0.3675 | 6 |
| 153                                | End of winter:8 weeks of winter vs. SPC -4 weeks post winter:8 weeks of winter       | 1.402  | 1.251  | 0.1518   | 0.3675 | 6 |
| 154                                | End of winter:8 weeks of winter vs. SPC -8 weeks post winter:2 weeks of winter       | 1.402  | 1.307  | 0.09557  | 0.3675 | 6 |
| 155                                | End of winter:8 weeks of winter vs. SPC -8 weeks post winter:4 weeks of winter       | 1.402  | 1.251  | 0.1518   | 0.3675 | 6 |
| 156                                | End of winter:8 weeks of winter vs. SPC -8 weeks post winter:8 weeks of winter       | 1.402  | 1.439  | -0.03626 | 0.3675 | 6 |
| 157                                | 4 weeks post winter:2 weeks of winter vs. 4 weeks post winter:4 weeks of winter      | 0.9066 | 1.733  | -0.8266  | 0.3675 | 6 |
| 158                                | 4 weeks post winter:2 weeks of winter vs. 4 weeks post winter:8 weeks of winter      | 0.9066 | 3.181  | -2.274   | 0.3675 | 6 |
| 159                                | 4 weeks post winter:2 weeks of winter vs. 8 weeks post winter:2 weeks of winter      | 0.9066 | 0.8786 | 0.02801  | 0.3675 | 6 |
| 160                                | 4 weeks post winter:2 weeks of winter vs. 8 weeks post winter:4 weeks of winter      | 0.9066 | 1.955  | -1.048   | 0.3675 | 6 |
| 161                                | 4 weeks post winter:2 weeks of winter vs. 8 weeks post winter:8 weeks of winter      | 0.9066 | 2.645  | -1.739   | 0.3675 | 6 |
| 162                                | 4 weeks post winter:2 weeks of winter vs. SPC -4 weeks post winter:2 weeks of winter | 0.9066 | 0.9635 | -0.05685 | 0.3675 | 6 |
| 163                                | 4 weeks post winter:2 weeks of winter vs. SPC -4 weeks post winter:4 weeks of winter | 0.9066 | 1.402  | -0.4957  | 0.3675 | 6 |
| 164                                | 4 weeks post winter:2 weeks of winter vs. SPC -4 weeks post winter:8 weeks of winter | 0.9066 | 1.251  | -0.3439  | 0.3675 | 6 |
| 165                                | 4 weeks post winter:2 weeks of winter vs. SPC -8 weeks post winter:2 weeks of winter | 0.9066 | 1.307  | -0.4001  | 0.3675 | 6 |
| 166                                | 4 weeks post winter:2 weeks of winter vs. SPC -8 weeks post winter:4 weeks of winter | 0.9066 | 1.251  | -0.3439  | 0.3675 | 6 |
| 167                                | 4 weeks post winter:2 weeks of winter vs. SPC -8 weeks post winter:8 weeks of winter | 0.9066 | 1.439  | -0.532   | 0.3675 | 6 |
| 168                                | 4 weeks post winter:4 weeks of winter vs. 4 weeks post winter:8 weeks of winter      | 1.733  | 3.181  | -1.447   | 0.3675 | 6 |
| 169                                | 4 weeks post winter:4 weeks of winter vs. 8 weeks post winter:2 weeks of winter      | 1.733  | 0.8786 | 0.8546   | 0.3675 | 6 |
| 170                                | 4 weeks post winter:4 weeks of winter vs. 8 weeks post winter:4 weeks of winter      | 1.733  | 1.955  | -0.2214  | 0.3675 | 6 |
| 171                                | 4 weeks post winter:4 weeks of winter vs. 8 weeks post winter:8 weeks of winter      | 1.733  | 2.645  | -0.9121  | 0.3675 | 6 |
| 172                                | 4 weeks post winter:4 weeks of winter vs. SPC -4 weeks post winter:2 weeks of winter | 1.733  | 0.9635 | 0.7697   | 0.3675 | 6 |
| 173                                | 4 weeks post winter:4 weeks of winter vs. SPC -4 weeks post winter:4 weeks of winter | 1.733  | 1.402  | 0.3309   | 0.3675 | 6 |
| 174                                | 4 weeks post winter:4 weeks of winter vs. SPC -4 weeks post winter:8 weeks of winter | 1.733  | 1.251  | 0.4827   | 0.3675 | 6 |
| 175                                | 4 weeks post winter:4 weeks of winter vs. SPC -8 weeks post winter:2 weeks of winter | 1.733  | 1.307  | 0.4264   | 0.3675 | 6 |
| 176                                | 4 weeks post winter:4 weeks of winter vs. SPC -8 weeks post winter:4 weeks of winter | 1.733  | 1.251  | 0.4827   | 0.3675 | 6 |
| 177                                | 4 weeks post winter:4 weeks of winter vs. SPC -8 weeks post winter:8 weeks of winter | 1.733  | 1.439  | 0.2946   | 0.3675 | 6 |
| 178                                | 4 weeks post winter:8 weeks of winter vs. 8 weeks post winter:2 weeks of winter      | 3.181  | 0.8786 | 2.302    | 0.3675 | 6 |
| 179                                | 4 weeks post winter:8 weeks of winter vs. 8 weeks post winter:4 weeks of winter      | 3.181  | 1.955  | 1.226    | 0.3675 | 6 |
| 180                                | 4 weeks post winter:8 weeks of winter vs. 8 weeks post winter:8 weeks of winter      | 3.181  | 2.645  | 0.5352   | 0.3675 | 6 |

| 2way ANOVA<br>Multiple comparisons |                                                                                           |        |        |          |        |   |
|------------------------------------|-------------------------------------------------------------------------------------------|--------|--------|----------|--------|---|
| 181                                | 4 weeks post winter:8 weeks of winter vs. SPC -4 weeks post winter:2 weeks of winter      | 3.181  | 0.9635 | 2.217    | 0.3675 | 6 |
| 182                                | 4 weeks post winter:8 weeks of winter vs. SPC -4 weeks post winter:4 weeks of winter      | 3.181  | 1.402  | 1.778    | 0.3675 | 6 |
| 183                                | 4 weeks post winter:8 weeks of winter vs. SPC -4 weeks post winter:8 weeks of winter      | 3.181  | 1.251  | 1.93     | 0.3675 | 6 |
| 184                                | 4 weeks post winter:8 weeks of winter vs. SPC -8 weeks post winter:2 weeks of winter      | 3.181  | 1.307  | 1.874    | 0.3675 | 6 |
| 185                                | 4 weeks post winter:8 weeks of winter vs. SPC -8 weeks post winter:4 weeks of winter      | 3.181  | 1.251  | 1.93     | 0.3675 | 6 |
| 186                                | 4 weeks post winter:8 weeks of winter vs. SPC -8 weeks post winter:8 weeks of winter      | 3.181  | 1.439  | 1.742    | 0.3675 | 6 |
| 187                                | 8 weeks post winter:2 weeks of winter vs. 8 weeks post winter:4 weeks of winter           | 0.8786 | 1.955  | -1.076   | 0.3675 | 6 |
| 188                                | 8 weeks post winter:2 weeks of winter vs. 8 weeks post winter:8 weeks of winter           | 0.8786 | 2.645  | -1.767   | 0.3675 | 6 |
| 189                                | 8 weeks post winter:2 weeks of winter vs. SPC -4 weeks post winter:2 weeks of winter      | 0.8786 | 0.9635 | -0.08486 | 0.3675 | 6 |
| 190                                | 8 weeks post winter:2 weeks of winter vs. SPC -4 weeks post winter:4 weeks of winter      | 0.8786 | 1.402  | -0.5237  | 0.3675 | 6 |
| 191                                | 8 weeks post winter:2 weeks of winter vs. SPC -4 weeks post winter:8 weeks of winter      | 0.8786 | 1.251  | -0.372   | 0.3675 | 6 |
| 192                                | 8 weeks post winter:2 weeks of winter vs. SPC -8 weeks post winter:2 weeks of winter      | 0.8786 | 1.307  | -0.4282  | 0.3675 | 6 |
| 193                                | 8 weeks post winter:2 weeks of winter vs. SPC -8 weeks post winter:4 weeks of winter      | 0.8786 | 1.251  | -0.372   | 0.3675 | 6 |
| 194                                | 8 weeks post winter:2 weeks of winter vs. SPC -8 weeks post winter:8 weeks of winter      | 0.8786 | 1.439  | -0.56    | 0.3675 | 6 |
| 195                                | 8 weeks post winter:4 weeks of winter vs. 8 weeks post winter:8 weeks of winter           | 1.955  | 2.645  | -0.6907  | 0.3675 | 6 |
| 196                                | 8 weeks post winter:4 weeks of winter vs. SPC -4 weeks post winter:2 weeks of winter      | 1.955  | 0.9635 | 0.9911   | 0.3675 | 6 |
| 197                                | 8 weeks post winter:4 weeks of winter vs. SPC -4 weeks post winter:4 weeks of winter      | 1.955  | 1.402  | 0.5522   | 0.3675 | 6 |
| 198                                | 8 weeks post winter:4 weeks of winter vs. SPC -4 weeks post winter:8 weeks of winter      | 1.955  | 1.251  | 0.704    | 0.3675 | 6 |
| 199                                | 8 weeks post winter:4 weeks of winter vs. SPC -8 weeks post winter:2 weeks of winter      | 1.955  | 1.307  | 0.6478   | 0.3675 | 6 |
| 200                                | 8 weeks post winter:4 weeks of winter vs. SPC -8 weeks post winter:4 weeks of winter      | 1.955  | 1.251  | 0.704    | 0.3675 | 6 |
| 201                                | 8 weeks post winter:4 weeks of winter vs. SPC -8 weeks post winter:8 weeks of winter      | 1.955  | 1.439  | 0.516    | 0.3675 | 6 |
| 202                                | 8 weeks post winter:8 weeks of winter vs. SPC -4 weeks post winter:2 weeks of winter      | 2.645  | 0.9635 | 1.682    | 0.3675 | 6 |
| 203                                | 8 weeks post winter:8 weeks of winter vs. SPC -4 weeks post winter:4 weeks of winter      | 2.645  | 1.402  | 1.243    | 0.3675 | 6 |
| 204                                | 8 weeks post winter:8 weeks of winter vs. SPC -4 weeks post winter:8 weeks of winter      | 2.645  | 1.251  | 1.395    | 0.3675 | 6 |
| 205                                | 8 weeks post winter:8 weeks of winter vs. SPC -8 weeks post winter:2 weeks of winter      | 2.645  | 1.307  | 1.339    | 0.3675 | 6 |
| 206                                | 8 weeks post winter:8 weeks of winter vs. SPC -8 weeks post winter:4 weeks of winter      | 2.645  | 1.251  | 1.395    | 0.3675 | 6 |
| 207                                | 8 weeks post winter:8 weeks of winter vs. SPC -8 weeks post winter:8 weeks of winter      | 2.645  | 1.439  | 1.207    | 0.3675 | 6 |
| 208                                | SPC -4 weeks post winter:2 weeks of winter vs. SPC -4 weeks post winter:4 weeks of winter | 0.9635 | 1.402  | -0.4389  | 0.3675 | 6 |
| 209                                | SPC -4 weeks post winter:2 weeks of winter vs. SPC -4 weeks post winter:8 weeks of winter | 0.9635 | 1.251  | -0.2871  | 0.3675 | 6 |
| 210                                | SPC -4 weeks post winter:2 weeks of winter vs. SPC -8 weeks post winter:2 weeks of winter | 0.9635 | 1.307  | -0.3433  | 0.3675 | 6 |

| <b>2way ANOVA</b><br>Multiple comparisons |                                                                                           |        |       |          |        |   |
|-------------------------------------------|-------------------------------------------------------------------------------------------|--------|-------|----------|--------|---|
| <b>211</b>                                | SPC -4 weeks post winter:2 weeks of winter vs. SPC -8 weeks post winter:4 weeks of winter | 0.9635 | 1.251 | -0.2871  | 0.3675 | 6 |
| <b>212</b>                                | SPC -4 weeks post winter:2 weeks of winter vs. SPC -8 weeks post winter:8 weeks of winter | 0.9635 | 1.439 | -0.4751  | 0.3675 | 6 |
| <b>213</b>                                | SPC -4 weeks post winter:4 weeks of winter vs. SPC -4 weeks post winter:8 weeks of winter | 1.402  | 1.251 | 0.1518   | 0.3675 | 6 |
| <b>214</b>                                | SPC -4 weeks post winter:4 weeks of winter vs. SPC -8 weeks post winter:2 weeks of winter | 1.402  | 1.307 | 0.09557  | 0.3675 | 6 |
| <b>215</b>                                | SPC -4 weeks post winter:4 weeks of winter vs. SPC -8 weeks post winter:4 weeks of winter | 1.402  | 1.251 | 0.1518   | 0.3675 | 6 |
| <b>216</b>                                | SPC -4 weeks post winter:4 weeks of winter vs. SPC -8 weeks post winter:8 weeks of winter | 1.402  | 1.439 | -0.03626 | 0.3675 | 6 |
| <b>217</b>                                | SPC -4 weeks post winter:8 weeks of winter vs. SPC -8 weeks post winter:2 weeks of winter | 1.251  | 1.307 | -0.05621 | 0.3675 | 6 |
| <b>218</b>                                | SPC -4 weeks post winter:8 weeks of winter vs. SPC -8 weeks post winter:4 weeks of winter | 1.251  | 1.251 | 0        | 0.3675 | 6 |
| <b>219</b>                                | SPC -4 weeks post winter:8 weeks of winter vs. SPC -8 weeks post winter:8 weeks of winter | 1.251  | 1.439 | -0.188   | 0.3675 | 6 |
| <b>220</b>                                | SPC -8 weeks post winter:2 weeks of winter vs. SPC -8 weeks post winter:4 weeks of winter | 1.307  | 1.251 | 0.05621  | 0.3675 | 6 |
| <b>221</b>                                | SPC -8 weeks post winter:2 weeks of winter vs. SPC -8 weeks post winter:8 weeks of winter | 1.307  | 1.439 | -0.1318  | 0.3675 | 6 |
| <b>222</b>                                | SPC -8 weeks post winter:4 weeks of winter vs. SPC -8 weeks post winter:8 weeks of winter | 1.251  | 1.439 | -0.188   | 0.3675 | 6 |

|    |  |  |  |
|----|--|--|--|
|    |  |  |  |
|    |  |  |  |
|    |  |  |  |
| 1  |  |  |  |
| 2  |  |  |  |
| 3  |  |  |  |
| 4  |  |  |  |
| 5  |  |  |  |
| 6  |  |  |  |
| 7  |  |  |  |
| 8  |  |  |  |
| 9  |  |  |  |
| 10 |  |  |  |
| 11 |  |  |  |
| 12 |  |  |  |
| 13 |  |  |  |
| 14 |  |  |  |
| 15 |  |  |  |
| 16 |  |  |  |
| 17 |  |  |  |
| 18 |  |  |  |
| 19 |  |  |  |
| 20 |  |  |  |
| 21 |  |  |  |
| 22 |  |  |  |
| 23 |  |  |  |
| 24 |  |  |  |
| 25 |  |  |  |
| 26 |  |  |  |
| 27 |  |  |  |
| 28 |  |  |  |
| 29 |  |  |  |
| 30 |  |  |  |



|    |  |  |  |
|----|--|--|--|
|    |  |  |  |
|    |  |  |  |
|    |  |  |  |
| 31 |  |  |  |
| 32 |  |  |  |
| 33 |  |  |  |
| 34 |  |  |  |
| 35 |  |  |  |
| 36 |  |  |  |
| 37 |  |  |  |
| 38 |  |  |  |
| 39 |  |  |  |
| 40 |  |  |  |
| 41 |  |  |  |
| 42 |  |  |  |
| 43 |  |  |  |
| 44 |  |  |  |
| 45 |  |  |  |
| 46 |  |  |  |
| 47 |  |  |  |
| 48 |  |  |  |
| 49 |  |  |  |
| 50 |  |  |  |
| 51 |  |  |  |
| 52 |  |  |  |
| 53 |  |  |  |
| 54 |  |  |  |
| 55 |  |  |  |
| 56 |  |  |  |
| 57 |  |  |  |
| 58 |  |  |  |
| 59 |  |  |  |
| 60 |  |  |  |

|    |  |  |  |
|----|--|--|--|
|    |  |  |  |
|    |  |  |  |
|    |  |  |  |
| 61 |  |  |  |
| 62 |  |  |  |
| 63 |  |  |  |
| 64 |  |  |  |
| 65 |  |  |  |
| 66 |  |  |  |
| 67 |  |  |  |
| 68 |  |  |  |
| 69 |  |  |  |
| 70 |  |  |  |
| 71 |  |  |  |
| 72 |  |  |  |
| 73 |  |  |  |
| 74 |  |  |  |
| 75 |  |  |  |
| 76 |  |  |  |
| 77 |  |  |  |
| 78 |  |  |  |
| 79 |  |  |  |
| 80 |  |  |  |
| 81 |  |  |  |
| 82 |  |  |  |
| 83 |  |  |  |
| 84 |  |  |  |
| 85 |  |  |  |
| 86 |  |  |  |
| 87 |  |  |  |
| 88 |  |  |  |
| 89 |  |  |  |
| 90 |  |  |  |

|            |    |        |    |
|------------|----|--------|----|
|            |    |        |    |
|            |    |        |    |
|            |    |        |    |
| <b>91</b>  |    |        |    |
| <b>92</b>  |    |        |    |
| <b>93</b>  |    |        |    |
| <b>94</b>  |    |        |    |
| <b>95</b>  |    |        |    |
| <b>96</b>  |    |        |    |
| <b>97</b>  |    |        |    |
| <b>98</b>  |    |        |    |
| <b>99</b>  |    |        |    |
| <b>100</b> |    |        |    |
| <b>101</b> |    |        |    |
| <b>102</b> |    |        |    |
| <b>103</b> |    |        |    |
| <b>104</b> |    |        |    |
| <b>105</b> |    |        |    |
| <b>106</b> |    |        |    |
| <b>107</b> |    |        |    |
| <b>108</b> |    |        |    |
| <b>109</b> |    |        |    |
| <b>110</b> |    |        |    |
| <b>111</b> |    |        |    |
| <b>112</b> |    |        |    |
| <b>113</b> |    |        |    |
| <b>114</b> |    |        |    |
| <b>115</b> |    |        |    |
| <b>116</b> | N2 | q      | DF |
| <b>117</b> |    |        |    |
| <b>118</b> | 6  | 1.143  | 75 |
| <b>119</b> | 6  | 1.392  | 75 |
| <b>120</b> | 6  | 0.5155 | 75 |

|            |   |        |    |
|------------|---|--------|----|
|            |   |        |    |
|            |   |        |    |
|            |   |        |    |
| <b>121</b> | 6 | 2.666  | 75 |
| <b>122</b> | 6 | 8.235  | 75 |
| <b>123</b> | 6 | 0.6233 | 75 |
| <b>124</b> | 6 | 3.518  | 75 |
| <b>125</b> | 6 | 6.176  | 75 |
| <b>126</b> | 6 | 0.2967 | 75 |
| <b>127</b> | 6 | 1.392  | 75 |
| <b>128</b> | 6 | 0.8081 | 75 |
| <b>129</b> | 6 | 1.024  | 75 |
| <b>130</b> | 6 | 0.8081 | 75 |
| <b>131</b> | 6 | 1.532  | 75 |
| <b>132</b> | 6 | 2.535  | 75 |
| <b>133</b> | 6 | 0.6271 | 75 |
| <b>134</b> | 6 | 3.808  | 75 |
| <b>135</b> | 6 | 9.378  | 75 |
| <b>136</b> | 6 | 0.5194 | 75 |
| <b>137</b> | 6 | 4.66   | 75 |
| <b>138</b> | 6 | 7.318  | 75 |
| <b>139</b> | 6 | 0.8459 | 75 |
| <b>140</b> | 6 | 2.535  | 75 |
| <b>141</b> | 6 | 1.951  | 75 |
| <b>142</b> | 6 | 2.167  | 75 |
| <b>143</b> | 6 | 1.951  | 75 |
| <b>144</b> | 6 | 2.674  | 75 |
| <b>145</b> | 6 | 1.908  | 75 |
| <b>146</b> | 6 | 1.273  | 75 |
| <b>147</b> | 6 | 6.843  | 75 |
| <b>148</b> | 6 | 2.016  | 75 |
| <b>149</b> | 6 | 2.125  | 75 |
| <b>150</b> | 6 | 4.783  | 75 |

| <b>151</b> | 6 | 1.689  | 75 |
|------------|---|--------|----|
| <b>152</b> | 6 | 0      | 75 |
| <b>153</b> | 6 | 0.5841 | 75 |
| <b>154</b> | 6 | 0.3678 | 75 |
| <b>155</b> | 6 | 0.5841 | 75 |
| <b>156</b> | 6 | 0.1395 | 75 |
| <b>157</b> | 6 | 3.181  | 75 |
| <b>158</b> | 6 | 8.751  | 75 |
| <b>159</b> | 6 | 0.1078 | 75 |
| <b>160</b> | 6 | 4.033  | 75 |
| <b>161</b> | 6 | 6.691  | 75 |
| <b>162</b> | 6 | 0.2188 | 75 |
| <b>163</b> | 6 | 1.908  | 75 |
| <b>164</b> | 6 | 1.324  | 75 |
| <b>165</b> | 6 | 1.54   | 75 |
| <b>166</b> | 6 | 1.324  | 75 |
| <b>167</b> | 6 | 2.047  | 75 |
| <b>168</b> | 6 | 5.57   | 75 |
| <b>169</b> | 6 | 3.289  | 75 |
| <b>170</b> | 6 | 0.8519 | 75 |
| <b>171</b> | 6 | 3.51   | 75 |
| <b>172</b> | 6 | 2.962  | 75 |
| <b>173</b> | 6 | 1.273  | 75 |
| <b>174</b> | 6 | 1.857  | 75 |
| <b>175</b> | 6 | 1.641  | 75 |
| <b>176</b> | 6 | 1.857  | 75 |
| <b>177</b> | 6 | 1.134  | 75 |
| <b>178</b> | 6 | 8.859  | 75 |
| <b>179</b> | 6 | 4.718  | 75 |
| <b>180</b> | 6 | 2.06   | 75 |

| <b>181</b> | 6 | 8.532  | 75 |
|------------|---|--------|----|
| <b>182</b> | 6 | 6.843  | 75 |
| <b>183</b> | 6 | 7.427  | 75 |
| <b>184</b> | 6 | 7.211  | 75 |
| <b>185</b> | 6 | 7.427  | 75 |
| <b>186</b> | 6 | 6.703  | 75 |
| <b>187</b> | 6 | 4.141  | 75 |
| <b>188</b> | 6 | 6.799  | 75 |
| <b>189</b> | 6 | 0.3266 | 75 |
| <b>190</b> | 6 | 2.016  | 75 |
| <b>191</b> | 6 | 1.431  | 75 |
| <b>192</b> | 6 | 1.648  | 75 |
| <b>193</b> | 6 | 1.431  | 75 |
| <b>194</b> | 6 | 2.155  | 75 |
| <b>195</b> | 6 | 2.658  | 75 |
| <b>196</b> | 6 | 3.814  | 75 |
| <b>197</b> | 6 | 2.125  | 75 |
| <b>198</b> | 6 | 2.709  | 75 |
| <b>199</b> | 6 | 2.493  | 75 |
| <b>200</b> | 6 | 2.709  | 75 |
| <b>201</b> | 6 | 1.986  | 75 |
| <b>202</b> | 6 | 6.472  | 75 |
| <b>203</b> | 6 | 4.783  | 75 |
| <b>204</b> | 6 | 5.367  | 75 |
| <b>205</b> | 6 | 5.151  | 75 |
| <b>206</b> | 6 | 5.367  | 75 |
| <b>207</b> | 6 | 4.644  | 75 |
| <b>208</b> | 6 | 1.689  | 75 |
| <b>209</b> | 6 | 1.105  | 75 |
| <b>210</b> | 6 | 1.321  | 75 |

|            |   |        |    |
|------------|---|--------|----|
|            |   |        |    |
|            |   |        |    |
|            |   |        |    |
| <b>211</b> | 6 | 1.105  | 75 |
| <b>212</b> | 6 | 1.828  | 75 |
| <b>213</b> | 6 | 0.5841 | 75 |
| <b>214</b> | 6 | 0.3678 | 75 |
| <b>215</b> | 6 | 0.5841 | 75 |
| <b>216</b> | 6 | 0.1395 | 75 |
| <b>217</b> | 6 | 0.2163 | 75 |
| <b>218</b> | 6 | 0      | 75 |
| <b>219</b> | 6 | 0.7237 | 75 |
| <b>220</b> | 6 | 0.2163 | 75 |
| <b>221</b> | 6 | 0.5073 | 75 |
| <b>222</b> | 6 | 0.7237 | 75 |

| 2way ANOVA<br>Tabular results |                          |                      |         |                 |                   |          |
|-------------------------------|--------------------------|----------------------|---------|-----------------|-------------------|----------|
| 1                             | Table Analyzed           | S100A                |         |                 |                   |          |
| 2                             |                          |                      |         |                 |                   |          |
| 3                             | Two-way ANOVA            | Ordinary             |         |                 |                   |          |
| 4                             | Alpha                    | 0.05                 |         |                 |                   |          |
| 5                             |                          |                      |         |                 |                   |          |
| 6                             | Source of Variation      | % of total variation | P value | P value summary | Significant?      |          |
| 7                             | Interaction              | 16.69                | <0.0001 | ****            | Yes               |          |
| 8                             | Time post-winter         | 44.31                | <0.0001 | ****            | Yes               |          |
| 9                             | Treatment                | 16.22                | <0.0001 | ****            | Yes               |          |
| 10                            |                          |                      |         |                 |                   |          |
| 11                            | ANOVA table              | SS                   | DF      | MS              | F (DFn, DFd)      | P value  |
| 12                            | Interaction              | 139.8                | 8       | 17.47           | F (8, 75) = 6.864 | P<0.0001 |
| 13                            | Time post-winter         | 371.1                | 4       | 92.77           | F (4, 75) = 36.45 | P<0.0001 |
| 14                            | Treatment                | 135.8                | 2       | 67.9            | F (2, 75) = 26.68 | P<0.0001 |
| 15                            | Residual                 | 190.9                | 75      | 2.545           |                   |          |
| 16                            |                          |                      |         |                 |                   |          |
| 17                            | Number of missing values | 0                    |         |                 |                   |          |



| 2way ANOVA<br>Multiple comparisons |                                                                                |            |                    |              |         |                  |
|------------------------------------|--------------------------------------------------------------------------------|------------|--------------------|--------------|---------|------------------|
| 1                                  | Compare cell means regardless of rows and columns                              |            |                    |              |         |                  |
| 2                                  |                                                                                |            |                    |              |         |                  |
| 3                                  | Number of families                                                             | 1          |                    |              |         |                  |
| 4                                  | Number of comparisons per family                                               | 105        |                    |              |         |                  |
| 5                                  | Alpha                                                                          | 0.05       |                    |              |         |                  |
| 6                                  |                                                                                |            |                    |              |         |                  |
| 7                                  | Tukey's multiple comparisons test                                              | Mean Diff. | 95.00% CI of diff. | Significant? | Summary | Adjusted P Value |
| 8                                  |                                                                                |            |                    |              |         |                  |
| 9                                  | End of winter:2 weeks of winter vs. End of winter:4 weeks of winter            | -0.2441    | -3.474 to 2.986    | No           | ns      | >0.9999          |
| 10                                 | End of winter:2 weeks of winter vs. End of winter:8 weeks of winter            | -0.04865   | -3.279 to 3.182    | No           | ns      | >0.9999          |
| 11                                 | End of winter:2 weeks of winter vs. 4 weeks post winter:2 weeks of winter      | -0.7398    | -3.97 to 2.49      | No           | ns      | >0.9999          |
| 12                                 | End of winter:2 weeks of winter vs. 4 weeks post winter:4 weeks of winter      | -1.701     | -4.931 to 1.529    | No           | ns      | 0.8708           |
| 13                                 | End of winter:2 weeks of winter vs. 4 weeks post winter:8 weeks of winter      | -6.062     | -9.292 to -2.832   | Yes          | ****    | <0.0001          |
| 14                                 | End of winter:2 weeks of winter vs. 8 weeks post winter:2 weeks of winter      | -1.674     | -4.904 to 1.556    | No           | ns      | 0.8835           |
| 15                                 | End of winter:2 weeks of winter vs. 8 weeks post winter:4 weeks of winter      | -4.879     | -8.109 to -1.649   | Yes          | ***     | 0.0001           |
| 16                                 | End of winter:2 weeks of winter vs. 8 weeks post winter:8 weeks of winter      | -9.18      | -12.41 to -5.95    | Yes          | ****    | <0.0001          |
| 17                                 | End of winter:2 weeks of winter vs. SPC -4 weeks post winter:2 weeks of winter | 0.1999     | -3.03 to 3.43      | No           | ns      | >0.9999          |
| 18                                 | End of winter:2 weeks of winter vs. SPC -4 weeks post winter:4 weeks of winter | -0.04865   | -3.279 to 3.182    | No           | ns      | >0.9999          |
| 19                                 | End of winter:2 weeks of winter vs. SPC -4 weeks post winter:8 weeks of winter | -0.1656    | -3.396 to 3.065    | No           | ns      | >0.9999          |
| 20                                 | End of winter:2 weeks of winter vs. SPC -8 weeks post winter:2 weeks of winter | 0.02359    | -3.207 to 3.254    | No           | ns      | >0.9999          |
| 21                                 | End of winter:2 weeks of winter vs. SPC -8 weeks post winter:4 weeks of winter | -0.1656    | -3.396 to 3.065    | No           | ns      | >0.9999          |
| 22                                 | End of winter:2 weeks of winter vs. SPC -8 weeks post winter:8 weeks of winter | -1.492     | -4.723 to 1.738    | No           | ns      | 0.9487           |
| 23                                 | End of winter:4 weeks of winter vs. End of winter:8 weeks of winter            | 0.1954     | -3.035 to 3.426    | No           | ns      | >0.9999          |
| 24                                 | End of winter:4 weeks of winter vs. 4 weeks post winter:2 weeks of winter      | -0.4957    | -3.726 to 2.734    | No           | ns      | >0.9999          |
| 25                                 | End of winter:4 weeks of winter vs. 4 weeks post winter:4 weeks of winter      | -1.457     | -4.687 to 1.774    | No           | ns      | 0.9576           |
| 26                                 | End of winter:4 weeks of winter vs. 4 weeks post winter:8 weeks of winter      | -5.818     | -9.048 to -2.587   | Yes          | ****    | <0.0001          |
| 27                                 | End of winter:4 weeks of winter vs. 8 weeks post winter:2 weeks of winter      | -1.43      | -4.66 to 1.8       | No           | ns      | 0.9634           |
| 28                                 | End of winter:4 weeks of winter vs. 8 weeks post winter:4 weeks of winter      | -4.635     | -7.865 to -1.405   | Yes          | ***     | 0.0003           |
| 29                                 | End of winter:4 weeks of winter vs. 8 weeks post winter:8 weeks of winter      | -8.936     | -12.17 to -5.706   | Yes          | ****    | <0.0001          |
| 30                                 | End of winter:4 weeks of winter vs. SPC -4 weeks post winter:2 weeks of winter | 0.444      | -2.786 to 3.674    | No           | ns      | >0.9999          |

| 2way ANOVA<br>Multiple comparisons |                                                                                      |         |                  |     |      |         |
|------------------------------------|--------------------------------------------------------------------------------------|---------|------------------|-----|------|---------|
| 31                                 | End of winter:4 weeks of winter vs. SPC -4 weeks post winter:4 weeks of winter       | 0.1954  | -3.035 to 3.426  | No  | ns   | >0.9999 |
| 32                                 | End of winter:4 weeks of winter vs. SPC -4 weeks post winter:8 weeks of winter       | 0.07851 | -3.152 to 3.309  | No  | ns   | >0.9999 |
| 33                                 | End of winter:4 weeks of winter vs. SPC -8 weeks post winter:2 weeks of winter       | 0.2677  | -2.962 to 3.498  | No  | ns   | >0.9999 |
| 34                                 | End of winter:4 weeks of winter vs. SPC -8 weeks post winter:4 weeks of winter       | 0.07851 | -3.152 to 3.309  | No  | ns   | >0.9999 |
| 35                                 | End of winter:4 weeks of winter vs. SPC -8 weeks post winter:8 weeks of winter       | -1.248  | -4.478 to 1.982  | No  | ns   | 0.9888  |
| 36                                 | End of winter:8 weeks of winter vs. 4 weeks post winter:2 weeks of winter            | -0.6912 | -3.921 to 2.539  | No  | ns   | >0.9999 |
| 37                                 | End of winter:8 weeks of winter vs. 4 weeks post winter:4 weeks of winter            | -1.652  | -4.882 to 1.578  | No  | ns   | 0.8932  |
| 38                                 | End of winter:8 weeks of winter vs. 4 weeks post winter:8 weeks of winter            | -6.013  | -9.243 to -2.783 | Yes | **** | <0.0001 |
| 39                                 | End of winter:8 weeks of winter vs. 8 weeks post winter:2 weeks of winter            | -1.625  | -4.855 to 1.605  | No  | ns   | 0.9044  |
| 40                                 | End of winter:8 weeks of winter vs. 8 weeks post winter:4 weeks of winter            | -4.831  | -8.061 to -1.6   | Yes | ***  | 0.0001  |
| 41                                 | End of winter:8 weeks of winter vs. 8 weeks post winter:8 weeks of winter            | -9.131  | -12.36 to -5.901 | Yes | **** | <0.0001 |
| 42                                 | End of winter:8 weeks of winter vs. SPC -4 weeks post winter:2 weeks of winter       | 0.2486  | -2.982 to 3.479  | No  | ns   | >0.9999 |
| 43                                 | End of winter:8 weeks of winter vs. SPC -4 weeks post winter:4 weeks of winter       | 0       | -3.23 to 3.23    | No  | ns   | >0.9999 |
| 44                                 | End of winter:8 weeks of winter vs. SPC -4 weeks post winter:8 weeks of winter       | -0.1169 | -3.347 to 3.113  | No  | ns   | >0.9999 |
| 45                                 | End of winter:8 weeks of winter vs. SPC -8 weeks post winter:2 weeks of winter       | 0.07224 | -3.158 to 3.302  | No  | ns   | >0.9999 |
| 46                                 | End of winter:8 weeks of winter vs. SPC -8 weeks post winter:4 weeks of winter       | -0.1169 | -3.347 to 3.113  | No  | ns   | >0.9999 |
| 47                                 | End of winter:8 weeks of winter vs. SPC -8 weeks post winter:8 weeks of winter       | -1.444  | -4.674 to 1.786  | No  | ns   | 0.9605  |
| 48                                 | 4 weeks post winter:2 weeks of winter vs. 4 weeks post winter:4 weeks of winter      | -0.9609 | -4.191 to 2.269  | No  | ns   | 0.9992  |
| 49                                 | 4 weeks post winter:2 weeks of winter vs. 4 weeks post winter:8 weeks of winter      | -5.322  | -8.552 to -2.092 | Yes | **** | <0.0001 |
| 50                                 | 4 weeks post winter:2 weeks of winter vs. 8 weeks post winter:2 weeks of winter      | -0.934  | -4.164 to 2.296  | No  | ns   | 0.9994  |
| 51                                 | 4 weeks post winter:2 weeks of winter vs. 8 weeks post winter:4 weeks of winter      | -4.139  | -7.37 to -0.9093 | Yes | **   | 0.0022  |
| 52                                 | 4 weeks post winter:2 weeks of winter vs. 8 weeks post winter:8 weeks of winter      | -8.44   | -11.67 to -5.21  | Yes | **** | <0.0001 |
| 53                                 | 4 weeks post winter:2 weeks of winter vs. SPC -4 weeks post winter:2 weeks of winter | 0.9397  | -2.29 to 4.17    | No  | ns   | 0.9994  |
| 54                                 | 4 weeks post winter:2 weeks of winter vs. SPC -4 weeks post winter:4 weeks of winter | 0.6912  | -2.539 to 3.921  | No  | ns   | >0.9999 |
| 55                                 | 4 weeks post winter:2 weeks of winter vs. SPC -4 weeks post winter:8 weeks of winter | 0.5742  | -2.656 to 3.804  | No  | ns   | >0.9999 |
| 56                                 | 4 weeks post winter:2 weeks of winter vs. SPC -8 weeks post winter:2 weeks of winter | 0.7634  | -2.467 to 3.994  | No  | ns   | >0.9999 |
| 57                                 | 4 weeks post winter:2 weeks of winter vs. SPC -8 weeks post winter:4 weeks of winter | 0.5742  | -2.656 to 3.804  | No  | ns   | >0.9999 |
| 58                                 | 4 weeks post winter:2 weeks of winter vs. SPC -8 weeks post winter:8 weeks of winter | -0.7526 | -3.983 to 2.478  | No  | ns   | >0.9999 |
| 59                                 | 4 weeks post winter:4 weeks of winter vs. 4 weeks post winter:8 weeks of winter      | -4.361  | -7.591 to -1.131 | Yes | ***  | 0.0009  |
| 60                                 | 4 weeks post winter:4 weeks of winter vs. 8 weeks post winter:2 weeks of winter      | 0.02688 | -3.203 to 3.257  | No  | ns   | >0.9999 |

| 2way ANOVA<br>Multiple comparisons |                                                                                      |        |                   |     |      |         |
|------------------------------------|--------------------------------------------------------------------------------------|--------|-------------------|-----|------|---------|
| 61                                 | 4 weeks post winter:4 weeks of winter vs. 8 weeks post winter:4 weeks of winter      | -3.179 | -6.409 to 0.05163 | No  | ns   | 0.0583  |
| 62                                 | 4 weeks post winter:4 weeks of winter vs. 8 weeks post winter:8 weeks of winter      | -7.479 | -10.71 to -4.249  | Yes | **** | <0.0001 |
| 63                                 | 4 weeks post winter:4 weeks of winter vs. SPC -4 weeks post winter:2 weeks of winter | 1.901  | -1.33 to 5.131    | No  | ns   | 0.7536  |
| 64                                 | 4 weeks post winter:4 weeks of winter vs. SPC -4 weeks post winter:4 weeks of winter | 1.652  | -1.578 to 4.882   | No  | ns   | 0.8932  |
| 65                                 | 4 weeks post winter:4 weeks of winter vs. SPC -4 weeks post winter:8 weeks of winter | 1.535  | -1.695 to 4.765   | No  | ns   | 0.9365  |
| 66                                 | 4 weeks post winter:4 weeks of winter vs. SPC -8 weeks post winter:2 weeks of winter | 1.724  | -1.506 to 4.954   | No  | ns   | 0.8591  |
| 67                                 | 4 weeks post winter:4 weeks of winter vs. SPC -8 weeks post winter:4 weeks of winter | 1.535  | -1.695 to 4.765   | No  | ns   | 0.9365  |
| 68                                 | 4 weeks post winter:4 weeks of winter vs. SPC -8 weeks post winter:8 weeks of winter | 0.2083 | -3.022 to 3.438   | No  | ns   | >0.9999 |
| 69                                 | 4 weeks post winter:8 weeks of winter vs. 8 weeks post winter:2 weeks of winter      | 4.388  | 1.158 to 7.618    | Yes | ***  | 0.0008  |
| 70                                 | 4 weeks post winter:8 weeks of winter vs. 8 weeks post winter:4 weeks of winter      | 1.182  | -2.048 to 4.413   | No  | ns   | 0.9933  |
| 71                                 | 4 weeks post winter:8 weeks of winter vs. 8 weeks post winter:8 weeks of winter      | -3.118 | -6.348 to 0.1119  | No  | ns   | 0.0695  |
| 72                                 | 4 weeks post winter:8 weeks of winter vs. SPC -4 weeks post winter:2 weeks of winter | 6.262  | 3.031 to 9.492    | Yes | **** | <0.0001 |
| 73                                 | 4 weeks post winter:8 weeks of winter vs. SPC -4 weeks post winter:4 weeks of winter | 6.013  | 2.783 to 9.243    | Yes | **** | <0.0001 |
| 74                                 | 4 weeks post winter:8 weeks of winter vs. SPC -4 weeks post winter:8 weeks of winter | 5.896  | 2.666 to 9.126    | Yes | **** | <0.0001 |
| 75                                 | 4 weeks post winter:8 weeks of winter vs. SPC -8 weeks post winter:2 weeks of winter | 6.085  | 2.855 to 9.315    | Yes | **** | <0.0001 |
| 76                                 | 4 weeks post winter:8 weeks of winter vs. SPC -8 weeks post winter:4 weeks of winter | 5.896  | 2.666 to 9.126    | Yes | **** | <0.0001 |
| 77                                 | 4 weeks post winter:8 weeks of winter vs. SPC -8 weeks post winter:8 weeks of winter | 4.569  | 1.339 to 7.799    | Yes | ***  | 0.0004  |
| 78                                 | 8 weeks post winter:2 weeks of winter vs. 8 weeks post winter:4 weeks of winter      | -3.205 | -6.436 to 0.02475 | No  | ns   | 0.0539  |
| 79                                 | 8 weeks post winter:2 weeks of winter vs. 8 weeks post winter:8 weeks of winter      | -7.506 | -10.74 to -4.276  | Yes | **** | <0.0001 |
| 80                                 | 8 weeks post winter:2 weeks of winter vs. SPC -4 weeks post winter:2 weeks of winter | 1.874  | -1.356 to 5.104   | No  | ns   | 0.7715  |
| 81                                 | 8 weeks post winter:2 weeks of winter vs. SPC -4 weeks post winter:4 weeks of winter | 1.625  | -1.605 to 4.855   | No  | ns   | 0.9044  |
| 82                                 | 8 weeks post winter:2 weeks of winter vs. SPC -4 weeks post winter:8 weeks of winter | 1.508  | -1.722 to 4.738   | No  | ns   | 0.9444  |
| 83                                 | 8 weeks post winter:2 weeks of winter vs. SPC -8 weeks post winter:2 weeks of winter | 1.697  | -1.533 to 4.928   | No  | ns   | 0.8724  |
| 84                                 | 8 weeks post winter:2 weeks of winter vs. SPC -8 weeks post winter:4 weeks of winter | 1.508  | -1.722 to 4.738   | No  | ns   | 0.9444  |
| 85                                 | 8 weeks post winter:2 weeks of winter vs. SPC -8 weeks post winter:8 weeks of winter | 0.1814 | -3.049 to 3.412   | No  | ns   | >0.9999 |
| 86                                 | 8 weeks post winter:4 weeks of winter vs. 8 weeks post winter:8 weeks of winter      | -4.301 | -7.531 to -1.071  | Yes | **   | 0.0012  |
| 87                                 | 8 weeks post winter:4 weeks of winter vs. SPC -4 weeks post winter:2 weeks of winter | 5.079  | 1.849 to 8.309    | Yes | **** | <0.0001 |
| 88                                 | 8 weeks post winter:4 weeks of winter vs. SPC -4 weeks post winter:4 weeks of winter | 4.831  | 1.6 to 8.061      | Yes | ***  | 0.0001  |
| 89                                 | 8 weeks post winter:4 weeks of winter vs. SPC -4 weeks post winter:8 weeks of winter | 4.714  | 1.483 to 7.944    | Yes | ***  | 0.0002  |
| 90                                 | 8 weeks post winter:4 weeks of winter vs. SPC -8 weeks post winter:2 weeks of winter | 4.903  | 1.673 to 8.133    | Yes | **** | <0.0001 |

| 2way ANOVA<br>Multiple comparisons |                                                                                           |         |                 |            |             |         |
|------------------------------------|-------------------------------------------------------------------------------------------|---------|-----------------|------------|-------------|---------|
| 91                                 | 8 weeks post winter:4 weeks of winter vs. SPC -8 weeks post winter:4 weeks of winter      | 4.714   | 1.483 to 7.944  | Yes        | ***         | 0.0002  |
| 92                                 | 8 weeks post winter:4 weeks of winter vs. SPC -8 weeks post winter:8 weeks of winter      | 3.387   | 0.1567 to 6.617 | Yes        | *           | 0.0308  |
| 93                                 | 8 weeks post winter:8 weeks of winter vs. SPC -4 weeks post winter:2 weeks of winter      | 9.38    | 6.15 to 12.61   | Yes        | ****        | <0.0001 |
| 94                                 | 8 weeks post winter:8 weeks of winter vs. SPC -4 weeks post winter:4 weeks of winter      | 9.131   | 5.901 to 12.36  | Yes        | ****        | <0.0001 |
| 95                                 | 8 weeks post winter:8 weeks of winter vs. SPC -4 weeks post winter:8 weeks of winter      | 9.014   | 5.784 to 12.24  | Yes        | ****        | <0.0001 |
| 96                                 | 8 weeks post winter:8 weeks of winter vs. SPC -8 weeks post winter:2 weeks of winter      | 9.204   | 5.973 to 12.43  | Yes        | ****        | <0.0001 |
| 97                                 | 8 weeks post winter:8 weeks of winter vs. SPC -8 weeks post winter:4 weeks of winter      | 9.014   | 5.784 to 12.24  | Yes        | ****        | <0.0001 |
| 98                                 | 8 weeks post winter:8 weeks of winter vs. SPC -8 weeks post winter:8 weeks of winter      | 7.688   | 4.457 to 10.92  | Yes        | ****        | <0.0001 |
| 99                                 | SPC -4 weeks post winter:2 weeks of winter vs. SPC -4 weeks post winter:4 weeks of winter | -0.2486 | -3.479 to 2.982 | No         | ns          | >0.9999 |
| 100                                | SPC -4 weeks post winter:2 weeks of winter vs. SPC -4 weeks post winter:8 weeks of winter | -0.3655 | -3.596 to 2.865 | No         | ns          | >0.9999 |
| 101                                | SPC -4 weeks post winter:2 weeks of winter vs. SPC -8 weeks post winter:2 weeks of winter | -0.1763 | -3.407 to 3.054 | No         | ns          | >0.9999 |
| 102                                | SPC -4 weeks post winter:2 weeks of winter vs. SPC -8 weeks post winter:4 weeks of winter | -0.3655 | -3.596 to 2.865 | No         | ns          | >0.9999 |
| 103                                | SPC -4 weeks post winter:2 weeks of winter vs. SPC -8 weeks post winter:8 weeks of winter | -1.692  | -4.923 to 1.538 | No         | ns          | 0.8749  |
| 104                                | SPC -4 weeks post winter:4 weeks of winter vs. SPC -4 weeks post winter:8 weeks of winter | -0.1169 | -3.347 to 3.113 | No         | ns          | >0.9999 |
| 105                                | SPC -4 weeks post winter:4 weeks of winter vs. SPC -8 weeks post winter:2 weeks of winter | 0.07224 | -3.158 to 3.302 | No         | ns          | >0.9999 |
| 106                                | SPC -4 weeks post winter:4 weeks of winter vs. SPC -8 weeks post winter:4 weeks of winter | -0.1169 | -3.347 to 3.113 | No         | ns          | >0.9999 |
| 107                                | SPC -4 weeks post winter:4 weeks of winter vs. SPC -8 weeks post winter:8 weeks of winter | -1.444  | -4.674 to 1.786 | No         | ns          | 0.9605  |
| 108                                | SPC -4 weeks post winter:8 weeks of winter vs. SPC -8 weeks post winter:2 weeks of winter | 0.1892  | -3.041 to 3.419 | No         | ns          | >0.9999 |
| 109                                | SPC -4 weeks post winter:8 weeks of winter vs. SPC -8 weeks post winter:4 weeks of winter | 0       | -3.23 to 3.23   | No         | ns          | >0.9999 |
| 110                                | SPC -4 weeks post winter:8 weeks of winter vs. SPC -8 weeks post winter:8 weeks of winter | -1.327  | -4.557 to 1.903 | No         | ns          | 0.9805  |
| 111                                | SPC -8 weeks post winter:2 weeks of winter vs. SPC -8 weeks post winter:4 weeks of winter | -0.1892 | -3.419 to 3.041 | No         | ns          | >0.9999 |
| 112                                | SPC -8 weeks post winter:2 weeks of winter vs. SPC -8 weeks post winter:8 weeks of winter | -1.516  | -4.746 to 1.714 | No         | ns          | 0.9422  |
| 113                                | SPC -8 weeks post winter:4 weeks of winter vs. SPC -8 weeks post winter:8 weeks of winter | -1.327  | -4.557 to 1.903 | No         | ns          | 0.9805  |
| 114                                |                                                                                           |         |                 |            |             |         |
| 115                                |                                                                                           |         |                 |            |             |         |
| 116                                | Test details                                                                              | Mean 1  | Mean 2          | Mean Diff. | SE of diff. | N1      |
| 117                                |                                                                                           |         |                 |            |             |         |
| 118                                | End of winter:2 weeks of winter vs. End of winter:4 weeks of winter                       | 0.6577  | 0.9018          | -0.2441    | 0.9211      | 6       |
| 119                                | End of winter:2 weeks of winter vs. End of winter:8 weeks of winter                       | 0.6577  | 0.7064          | -0.04865   | 0.9211      | 6       |
| 120                                | End of winter:2 weeks of winter vs. 4 weeks post winter:2 weeks of winter                 | 0.6577  | 1.398           | -0.7398    | 0.9211      | 6       |

| 2way ANOVA<br>Multiple comparisons |                                                                                |        |        |          |        |   |
|------------------------------------|--------------------------------------------------------------------------------|--------|--------|----------|--------|---|
| 121                                | End of winter:2 weeks of winter vs. 4 weeks post winter:4 weeks of winter      | 0.6577 | 2.358  | -1.701   | 0.9211 | 6 |
| 122                                | End of winter:2 weeks of winter vs. 4 weeks post winter:8 weeks of winter      | 0.6577 | 6.719  | -6.062   | 0.9211 | 6 |
| 123                                | End of winter:2 weeks of winter vs. 8 weeks post winter:2 weeks of winter      | 0.6577 | 2.332  | -1.674   | 0.9211 | 6 |
| 124                                | End of winter:2 weeks of winter vs. 8 weeks post winter:4 weeks of winter      | 0.6577 | 5.537  | -4.879   | 0.9211 | 6 |
| 125                                | End of winter:2 weeks of winter vs. 8 weeks post winter:8 weeks of winter      | 0.6577 | 9.838  | -9.18    | 0.9211 | 6 |
| 126                                | End of winter:2 weeks of winter vs. SPC -4 weeks post winter:2 weeks of winter | 0.6577 | 0.4578 | 0.1999   | 0.9211 | 6 |
| 127                                | End of winter:2 weeks of winter vs. SPC -4 weeks post winter:4 weeks of winter | 0.6577 | 0.7064 | -0.04865 | 0.9211 | 6 |
| 128                                | End of winter:2 weeks of winter vs. SPC -4 weeks post winter:8 weeks of winter | 0.6577 | 0.8233 | -0.1656  | 0.9211 | 6 |
| 129                                | End of winter:2 weeks of winter vs. SPC -8 weeks post winter:2 weeks of winter | 0.6577 | 0.6341 | 0.02359  | 0.9211 | 6 |
| 130                                | End of winter:2 weeks of winter vs. SPC -8 weeks post winter:4 weeks of winter | 0.6577 | 0.8233 | -0.1656  | 0.9211 | 6 |
| 131                                | End of winter:2 weeks of winter vs. SPC -8 weeks post winter:8 weeks of winter | 0.6577 | 2.15   | -1.492   | 0.9211 | 6 |
| 132                                | End of winter:4 weeks of winter vs. End of winter:8 weeks of winter            | 0.9018 | 0.7064 | 0.1954   | 0.9211 | 6 |
| 133                                | End of winter:4 weeks of winter vs. 4 weeks post winter:2 weeks of winter      | 0.9018 | 1.398  | -0.4957  | 0.9211 | 6 |
| 134                                | End of winter:4 weeks of winter vs. 4 weeks post winter:4 weeks of winter      | 0.9018 | 2.358  | -1.457   | 0.9211 | 6 |
| 135                                | End of winter:4 weeks of winter vs. 4 weeks post winter:8 weeks of winter      | 0.9018 | 6.719  | -5.818   | 0.9211 | 6 |
| 136                                | End of winter:4 weeks of winter vs. 8 weeks post winter:2 weeks of winter      | 0.9018 | 2.332  | -1.43    | 0.9211 | 6 |
| 137                                | End of winter:4 weeks of winter vs. 8 weeks post winter:4 weeks of winter      | 0.9018 | 5.537  | -4.635   | 0.9211 | 6 |
| 138                                | End of winter:4 weeks of winter vs. 8 weeks post winter:8 weeks of winter      | 0.9018 | 9.838  | -8.936   | 0.9211 | 6 |
| 139                                | End of winter:4 weeks of winter vs. SPC -4 weeks post winter:2 weeks of winter | 0.9018 | 0.4578 | 0.444    | 0.9211 | 6 |
| 140                                | End of winter:4 weeks of winter vs. SPC -4 weeks post winter:4 weeks of winter | 0.9018 | 0.7064 | 0.1954   | 0.9211 | 6 |
| 141                                | End of winter:4 weeks of winter vs. SPC -4 weeks post winter:8 weeks of winter | 0.9018 | 0.8233 | 0.07851  | 0.9211 | 6 |
| 142                                | End of winter:4 weeks of winter vs. SPC -8 weeks post winter:2 weeks of winter | 0.9018 | 0.6341 | 0.2677   | 0.9211 | 6 |
| 143                                | End of winter:4 weeks of winter vs. SPC -8 weeks post winter:4 weeks of winter | 0.9018 | 0.8233 | 0.07851  | 0.9211 | 6 |
| 144                                | End of winter:4 weeks of winter vs. SPC -8 weeks post winter:8 weeks of winter | 0.9018 | 2.15   | -1.248   | 0.9211 | 6 |
| 145                                | End of winter:8 weeks of winter vs. 4 weeks post winter:2 weeks of winter      | 0.7064 | 1.398  | -0.6912  | 0.9211 | 6 |
| 146                                | End of winter:8 weeks of winter vs. 4 weeks post winter:4 weeks of winter      | 0.7064 | 2.358  | -1.652   | 0.9211 | 6 |
| 147                                | End of winter:8 weeks of winter vs. 4 weeks post winter:8 weeks of winter      | 0.7064 | 6.719  | -6.013   | 0.9211 | 6 |
| 148                                | End of winter:8 weeks of winter vs. 8 weeks post winter:2 weeks of winter      | 0.7064 | 2.332  | -1.625   | 0.9211 | 6 |
| 149                                | End of winter:8 weeks of winter vs. 8 weeks post winter:4 weeks of winter      | 0.7064 | 5.537  | -4.831   | 0.9211 | 6 |
| 150                                | End of winter:8 weeks of winter vs. 8 weeks post winter:8 weeks of winter      | 0.7064 | 9.838  | -9.131   | 0.9211 | 6 |

| 2way ANOVA<br>Multiple comparisons |                                                                                      |        |        |         |        |   |
|------------------------------------|--------------------------------------------------------------------------------------|--------|--------|---------|--------|---|
| 151                                | End of winter:8 weeks of winter vs. SPC -4 weeks post winter:2 weeks of winter       | 0.7064 | 0.4578 | 0.2486  | 0.9211 | 6 |
| 152                                | End of winter:8 weeks of winter vs. SPC -4 weeks post winter:4 weeks of winter       | 0.7064 | 0.7064 | 0       | 0.9211 | 6 |
| 153                                | End of winter:8 weeks of winter vs. SPC -4 weeks post winter:8 weeks of winter       | 0.7064 | 0.8233 | -0.1169 | 0.9211 | 6 |
| 154                                | End of winter:8 weeks of winter vs. SPC -8 weeks post winter:2 weeks of winter       | 0.7064 | 0.6341 | 0.07224 | 0.9211 | 6 |
| 155                                | End of winter:8 weeks of winter vs. SPC -8 weeks post winter:4 weeks of winter       | 0.7064 | 0.8233 | -0.1169 | 0.9211 | 6 |
| 156                                | End of winter:8 weeks of winter vs. SPC -8 weeks post winter:8 weeks of winter       | 0.7064 | 2.15   | -1.444  | 0.9211 | 6 |
| 157                                | 4 weeks post winter:2 weeks of winter vs. 4 weeks post winter:4 weeks of winter      | 1.398  | 2.358  | -0.9609 | 0.9211 | 6 |
| 158                                | 4 weeks post winter:2 weeks of winter vs. 4 weeks post winter:8 weeks of winter      | 1.398  | 6.719  | -5.322  | 0.9211 | 6 |
| 159                                | 4 weeks post winter:2 weeks of winter vs. 8 weeks post winter:2 weeks of winter      | 1.398  | 2.332  | -0.934  | 0.9211 | 6 |
| 160                                | 4 weeks post winter:2 weeks of winter vs. 8 weeks post winter:4 weeks of winter      | 1.398  | 5.537  | -4.139  | 0.9211 | 6 |
| 161                                | 4 weeks post winter:2 weeks of winter vs. 8 weeks post winter:8 weeks of winter      | 1.398  | 9.838  | -8.44   | 0.9211 | 6 |
| 162                                | 4 weeks post winter:2 weeks of winter vs. SPC -4 weeks post winter:2 weeks of winter | 1.398  | 0.4578 | 0.9397  | 0.9211 | 6 |
| 163                                | 4 weeks post winter:2 weeks of winter vs. SPC -4 weeks post winter:4 weeks of winter | 1.398  | 0.7064 | 0.6912  | 0.9211 | 6 |
| 164                                | 4 weeks post winter:2 weeks of winter vs. SPC -4 weeks post winter:8 weeks of winter | 1.398  | 0.8233 | 0.5742  | 0.9211 | 6 |
| 165                                | 4 weeks post winter:2 weeks of winter vs. SPC -8 weeks post winter:2 weeks of winter | 1.398  | 0.6341 | 0.7634  | 0.9211 | 6 |
| 166                                | 4 weeks post winter:2 weeks of winter vs. SPC -8 weeks post winter:4 weeks of winter | 1.398  | 0.8233 | 0.5742  | 0.9211 | 6 |
| 167                                | 4 weeks post winter:2 weeks of winter vs. SPC -8 weeks post winter:8 weeks of winter | 1.398  | 2.15   | -0.7526 | 0.9211 | 6 |
| 168                                | 4 weeks post winter:4 weeks of winter vs. 4 weeks post winter:8 weeks of winter      | 2.358  | 6.719  | -4.361  | 0.9211 | 6 |
| 169                                | 4 weeks post winter:4 weeks of winter vs. 8 weeks post winter:2 weeks of winter      | 2.358  | 2.332  | 0.02688 | 0.9211 | 6 |
| 170                                | 4 weeks post winter:4 weeks of winter vs. 8 weeks post winter:4 weeks of winter      | 2.358  | 5.537  | -3.179  | 0.9211 | 6 |
| 171                                | 4 weeks post winter:4 weeks of winter vs. 8 weeks post winter:8 weeks of winter      | 2.358  | 9.838  | -7.479  | 0.9211 | 6 |
| 172                                | 4 weeks post winter:4 weeks of winter vs. SPC -4 weeks post winter:2 weeks of winter | 2.358  | 0.4578 | 1.901   | 0.9211 | 6 |
| 173                                | 4 weeks post winter:4 weeks of winter vs. SPC -4 weeks post winter:4 weeks of winter | 2.358  | 0.7064 | 1.652   | 0.9211 | 6 |
| 174                                | 4 weeks post winter:4 weeks of winter vs. SPC -4 weeks post winter:8 weeks of winter | 2.358  | 0.8233 | 1.535   | 0.9211 | 6 |
| 175                                | 4 weeks post winter:4 weeks of winter vs. SPC -8 weeks post winter:2 weeks of winter | 2.358  | 0.6341 | 1.724   | 0.9211 | 6 |
| 176                                | 4 weeks post winter:4 weeks of winter vs. SPC -8 weeks post winter:4 weeks of winter | 2.358  | 0.8233 | 1.535   | 0.9211 | 6 |
| 177                                | 4 weeks post winter:4 weeks of winter vs. SPC -8 weeks post winter:8 weeks of winter | 2.358  | 2.15   | 0.2083  | 0.9211 | 6 |
| 178                                | 4 weeks post winter:8 weeks of winter vs. 8 weeks post winter:2 weeks of winter      | 6.719  | 2.332  | 4.388   | 0.9211 | 6 |
| 179                                | 4 weeks post winter:8 weeks of winter vs. 8 weeks post winter:4 weeks of winter      | 6.719  | 5.537  | 1.182   | 0.9211 | 6 |
| 180                                | 4 weeks post winter:8 weeks of winter vs. 8 weeks post winter:8 weeks of winter      | 6.719  | 9.838  | -3.118  | 0.9211 | 6 |

| 2way ANOVA<br>Multiple comparisons |                                                                                           |        |        |         |        |   |
|------------------------------------|-------------------------------------------------------------------------------------------|--------|--------|---------|--------|---|
| <b>181</b>                         | 4 weeks post winter:8 weeks of winter vs. SPC -4 weeks post winter:2 weeks of winter      | 6.719  | 0.4578 | 6.262   | 0.9211 | 6 |
| <b>182</b>                         | 4 weeks post winter:8 weeks of winter vs. SPC -4 weeks post winter:4 weeks of winter      | 6.719  | 0.7064 | 6.013   | 0.9211 | 6 |
| <b>183</b>                         | 4 weeks post winter:8 weeks of winter vs. SPC -4 weeks post winter:8 weeks of winter      | 6.719  | 0.8233 | 5.896   | 0.9211 | 6 |
| <b>184</b>                         | 4 weeks post winter:8 weeks of winter vs. SPC -8 weeks post winter:2 weeks of winter      | 6.719  | 0.6341 | 6.085   | 0.9211 | 6 |
| <b>185</b>                         | 4 weeks post winter:8 weeks of winter vs. SPC -8 weeks post winter:4 weeks of winter      | 6.719  | 0.8233 | 5.896   | 0.9211 | 6 |
| <b>186</b>                         | 4 weeks post winter:8 weeks of winter vs. SPC -8 weeks post winter:8 weeks of winter      | 6.719  | 2.15   | 4.569   | 0.9211 | 6 |
| <b>187</b>                         | 8 weeks post winter:2 weeks of winter vs. 8 weeks post winter:4 weeks of winter           | 2.332  | 5.537  | -3.205  | 0.9211 | 6 |
| <b>188</b>                         | 8 weeks post winter:2 weeks of winter vs. 8 weeks post winter:8 weeks of winter           | 2.332  | 9.838  | -7.506  | 0.9211 | 6 |
| <b>189</b>                         | 8 weeks post winter:2 weeks of winter vs. SPC -4 weeks post winter:2 weeks of winter      | 2.332  | 0.4578 | 1.874   | 0.9211 | 6 |
| <b>190</b>                         | 8 weeks post winter:2 weeks of winter vs. SPC -4 weeks post winter:4 weeks of winter      | 2.332  | 0.7064 | 1.625   | 0.9211 | 6 |
| <b>191</b>                         | 8 weeks post winter:2 weeks of winter vs. SPC -4 weeks post winter:8 weeks of winter      | 2.332  | 0.8233 | 1.508   | 0.9211 | 6 |
| <b>192</b>                         | 8 weeks post winter:2 weeks of winter vs. SPC -8 weeks post winter:2 weeks of winter      | 2.332  | 0.6341 | 1.697   | 0.9211 | 6 |
| <b>193</b>                         | 8 weeks post winter:2 weeks of winter vs. SPC -8 weeks post winter:4 weeks of winter      | 2.332  | 0.8233 | 1.508   | 0.9211 | 6 |
| <b>194</b>                         | 8 weeks post winter:2 weeks of winter vs. SPC -8 weeks post winter:8 weeks of winter      | 2.332  | 2.15   | 0.1814  | 0.9211 | 6 |
| <b>195</b>                         | 8 weeks post winter:4 weeks of winter vs. 8 weeks post winter:8 weeks of winter           | 5.537  | 9.838  | -4.301  | 0.9211 | 6 |
| <b>196</b>                         | 8 weeks post winter:4 weeks of winter vs. SPC -4 weeks post winter:2 weeks of winter      | 5.537  | 0.4578 | 5.079   | 0.9211 | 6 |
| <b>197</b>                         | 8 weeks post winter:4 weeks of winter vs. SPC -4 weeks post winter:4 weeks of winter      | 5.537  | 0.7064 | 4.831   | 0.9211 | 6 |
| <b>198</b>                         | 8 weeks post winter:4 weeks of winter vs. SPC -4 weeks post winter:8 weeks of winter      | 5.537  | 0.8233 | 4.714   | 0.9211 | 6 |
| <b>199</b>                         | 8 weeks post winter:4 weeks of winter vs. SPC -8 weeks post winter:2 weeks of winter      | 5.537  | 0.6341 | 4.903   | 0.9211 | 6 |
| <b>200</b>                         | 8 weeks post winter:4 weeks of winter vs. SPC -8 weeks post winter:4 weeks of winter      | 5.537  | 0.8233 | 4.714   | 0.9211 | 6 |
| <b>201</b>                         | 8 weeks post winter:4 weeks of winter vs. SPC -8 weeks post winter:8 weeks of winter      | 5.537  | 2.15   | 3.387   | 0.9211 | 6 |
| <b>202</b>                         | 8 weeks post winter:8 weeks of winter vs. SPC -4 weeks post winter:2 weeks of winter      | 9.838  | 0.4578 | 9.38    | 0.9211 | 6 |
| <b>203</b>                         | 8 weeks post winter:8 weeks of winter vs. SPC -4 weeks post winter:4 weeks of winter      | 9.838  | 0.7064 | 9.131   | 0.9211 | 6 |
| <b>204</b>                         | 8 weeks post winter:8 weeks of winter vs. SPC -4 weeks post winter:8 weeks of winter      | 9.838  | 0.8233 | 9.014   | 0.9211 | 6 |
| <b>205</b>                         | 8 weeks post winter:8 weeks of winter vs. SPC -8 weeks post winter:2 weeks of winter      | 9.838  | 0.6341 | 9.204   | 0.9211 | 6 |
| <b>206</b>                         | 8 weeks post winter:8 weeks of winter vs. SPC -8 weeks post winter:4 weeks of winter      | 9.838  | 0.8233 | 9.014   | 0.9211 | 6 |
| <b>207</b>                         | 8 weeks post winter:8 weeks of winter vs. SPC -8 weeks post winter:8 weeks of winter      | 9.838  | 2.15   | 7.688   | 0.9211 | 6 |
| <b>208</b>                         | SPC -4 weeks post winter:2 weeks of winter vs. SPC -4 weeks post winter:4 weeks of winter | 0.4578 | 0.7064 | -0.2486 | 0.9211 | 6 |
| <b>209</b>                         | SPC -4 weeks post winter:2 weeks of winter vs. SPC -4 weeks post winter:8 weeks of winter | 0.4578 | 0.8233 | -0.3655 | 0.9211 | 6 |
| <b>210</b>                         | SPC -4 weeks post winter:2 weeks of winter vs. SPC -8 weeks post winter:2 weeks of winter | 0.4578 | 0.6341 | -0.1763 | 0.9211 | 6 |

| <b>2way ANOVA</b><br>Multiple comparisons |                                                                                           |        |        |         |        |   |
|-------------------------------------------|-------------------------------------------------------------------------------------------|--------|--------|---------|--------|---|
| <b>211</b>                                | SPC -4 weeks post winter:2 weeks of winter vs. SPC -8 weeks post winter:4 weeks of winter | 0.4578 | 0.8233 | -0.3655 | 0.9211 | 6 |
| <b>212</b>                                | SPC -4 weeks post winter:2 weeks of winter vs. SPC -8 weeks post winter:8 weeks of winter | 0.4578 | 2.15   | -1.692  | 0.9211 | 6 |
| <b>213</b>                                | SPC -4 weeks post winter:4 weeks of winter vs. SPC -4 weeks post winter:8 weeks of winter | 0.7064 | 0.8233 | -0.1169 | 0.9211 | 6 |
| <b>214</b>                                | SPC -4 weeks post winter:4 weeks of winter vs. SPC -8 weeks post winter:2 weeks of winter | 0.7064 | 0.6341 | 0.07224 | 0.9211 | 6 |
| <b>215</b>                                | SPC -4 weeks post winter:4 weeks of winter vs. SPC -8 weeks post winter:4 weeks of winter | 0.7064 | 0.8233 | -0.1169 | 0.9211 | 6 |
| <b>216</b>                                | SPC -4 weeks post winter:4 weeks of winter vs. SPC -8 weeks post winter:8 weeks of winter | 0.7064 | 2.15   | -1.444  | 0.9211 | 6 |
| <b>217</b>                                | SPC -4 weeks post winter:8 weeks of winter vs. SPC -8 weeks post winter:2 weeks of winter | 0.8233 | 0.6341 | 0.1892  | 0.9211 | 6 |
| <b>218</b>                                | SPC -4 weeks post winter:8 weeks of winter vs. SPC -8 weeks post winter:4 weeks of winter | 0.8233 | 0.8233 | 0       | 0.9211 | 6 |
| <b>219</b>                                | SPC -4 weeks post winter:8 weeks of winter vs. SPC -8 weeks post winter:8 weeks of winter | 0.8233 | 2.15   | -1.327  | 0.9211 | 6 |
| <b>220</b>                                | SPC -8 weeks post winter:2 weeks of winter vs. SPC -8 weeks post winter:4 weeks of winter | 0.6341 | 0.8233 | -0.1892 | 0.9211 | 6 |
| <b>221</b>                                | SPC -8 weeks post winter:2 weeks of winter vs. SPC -8 weeks post winter:8 weeks of winter | 0.6341 | 2.15   | -1.516  | 0.9211 | 6 |
| <b>222</b>                                | SPC -8 weeks post winter:4 weeks of winter vs. SPC -8 weeks post winter:8 weeks of winter | 0.8233 | 2.15   | -1.327  | 0.9211 | 6 |



|    |  |  |  |
|----|--|--|--|
|    |  |  |  |
|    |  |  |  |
|    |  |  |  |
| 1  |  |  |  |
| 2  |  |  |  |
| 3  |  |  |  |
| 4  |  |  |  |
| 5  |  |  |  |
| 6  |  |  |  |
| 7  |  |  |  |
| 8  |  |  |  |
| 9  |  |  |  |
| 10 |  |  |  |
| 11 |  |  |  |
| 12 |  |  |  |
| 13 |  |  |  |
| 14 |  |  |  |
| 15 |  |  |  |
| 16 |  |  |  |
| 17 |  |  |  |
| 18 |  |  |  |
| 19 |  |  |  |
| 20 |  |  |  |
| 21 |  |  |  |
| 22 |  |  |  |
| 23 |  |  |  |
| 24 |  |  |  |
| 25 |  |  |  |
| 26 |  |  |  |
| 27 |  |  |  |
| 28 |  |  |  |
| 29 |  |  |  |
| 30 |  |  |  |

|    |  |  |  |
|----|--|--|--|
|    |  |  |  |
|    |  |  |  |
|    |  |  |  |
| 31 |  |  |  |
| 32 |  |  |  |
| 33 |  |  |  |
| 34 |  |  |  |
| 35 |  |  |  |
| 36 |  |  |  |
| 37 |  |  |  |
| 38 |  |  |  |
| 39 |  |  |  |
| 40 |  |  |  |
| 41 |  |  |  |
| 42 |  |  |  |
| 43 |  |  |  |
| 44 |  |  |  |
| 45 |  |  |  |
| 46 |  |  |  |
| 47 |  |  |  |
| 48 |  |  |  |
| 49 |  |  |  |
| 50 |  |  |  |
| 51 |  |  |  |
| 52 |  |  |  |
| 53 |  |  |  |
| 54 |  |  |  |
| 55 |  |  |  |
| 56 |  |  |  |
| 57 |  |  |  |
| 58 |  |  |  |
| 59 |  |  |  |
| 60 |  |  |  |

|    |  |  |  |
|----|--|--|--|
|    |  |  |  |
|    |  |  |  |
|    |  |  |  |
| 61 |  |  |  |
| 62 |  |  |  |
| 63 |  |  |  |
| 64 |  |  |  |
| 65 |  |  |  |
| 66 |  |  |  |
| 67 |  |  |  |
| 68 |  |  |  |
| 69 |  |  |  |
| 70 |  |  |  |
| 71 |  |  |  |
| 72 |  |  |  |
| 73 |  |  |  |
| 74 |  |  |  |
| 75 |  |  |  |
| 76 |  |  |  |
| 77 |  |  |  |
| 78 |  |  |  |
| 79 |  |  |  |
| 80 |  |  |  |
| 81 |  |  |  |
| 82 |  |  |  |
| 83 |  |  |  |
| 84 |  |  |  |
| 85 |  |  |  |
| 86 |  |  |  |
| 87 |  |  |  |
| 88 |  |  |  |
| 89 |  |  |  |
| 90 |  |  |  |

|     |    |        |    |
|-----|----|--------|----|
|     |    |        |    |
|     |    |        |    |
|     |    |        |    |
| 91  |    |        |    |
| 92  |    |        |    |
| 93  |    |        |    |
| 94  |    |        |    |
| 95  |    |        |    |
| 96  |    |        |    |
| 97  |    |        |    |
| 98  |    |        |    |
| 99  |    |        |    |
| 100 |    |        |    |
| 101 |    |        |    |
| 102 |    |        |    |
| 103 |    |        |    |
| 104 |    |        |    |
| 105 |    |        |    |
| 106 |    |        |    |
| 107 |    |        |    |
| 108 |    |        |    |
| 109 |    |        |    |
| 110 |    |        |    |
| 111 |    |        |    |
| 112 |    |        |    |
| 113 |    |        |    |
| 114 |    |        |    |
| 115 |    |        |    |
| 116 | N2 | q      | DF |
| 117 |    |        |    |
| 118 | 6  | 0.3748 | 75 |
| 119 | 6  | 0.0747 | 75 |
| 120 | 6  | 1.136  | 75 |

| <b>121</b> | 6 | 2.611   | 75 |
|------------|---|---------|----|
| <b>122</b> | 6 | 9.307   | 75 |
| <b>123</b> | 6 | 2.57    | 75 |
| <b>124</b> | 6 | 7.492   | 75 |
| <b>125</b> | 6 | 14.1    | 75 |
| <b>126</b> | 6 | 0.307   | 75 |
| <b>127</b> | 6 | 0.0747  | 75 |
| <b>128</b> | 6 | 0.2543  | 75 |
| <b>129</b> | 6 | 0.03622 | 75 |
| <b>130</b> | 6 | 0.2543  | 75 |
| <b>131</b> | 6 | 2.291   | 75 |
| <b>132</b> | 6 | 0.3001  | 75 |
| <b>133</b> | 6 | 0.7611  | 75 |
| <b>134</b> | 6 | 2.236   | 75 |
| <b>135</b> | 6 | 8.932   | 75 |
| <b>136</b> | 6 | 2.195   | 75 |
| <b>137</b> | 6 | 7.117   | 75 |
| <b>138</b> | 6 | 13.72   | 75 |
| <b>139</b> | 6 | 0.6818  | 75 |
| <b>140</b> | 6 | 0.3001  | 75 |
| <b>141</b> | 6 | 0.1205  | 75 |
| <b>142</b> | 6 | 0.411   | 75 |
| <b>143</b> | 6 | 0.1205  | 75 |
| <b>144</b> | 6 | 1.917   | 75 |
| <b>145</b> | 6 | 1.061   | 75 |
| <b>146</b> | 6 | 2.537   | 75 |
| <b>147</b> | 6 | 9.233   | 75 |
| <b>148</b> | 6 | 2.495   | 75 |
| <b>149</b> | 6 | 7.417   | 75 |
| <b>150</b> | 6 | 14.02   | 75 |

|            |   |         |    |
|------------|---|---------|----|
|            |   |         |    |
|            |   |         |    |
|            |   |         |    |
| <b>151</b> | 6 | 0.3817  | 75 |
| <b>152</b> | 6 | 0       | 75 |
| <b>153</b> | 6 | 0.1796  | 75 |
| <b>154</b> | 6 | 0.1109  | 75 |
| <b>155</b> | 6 | 0.1796  | 75 |
| <b>156</b> | 6 | 2.217   | 75 |
| <b>157</b> | 6 | 1.475   | 75 |
| <b>158</b> | 6 | 8.171   | 75 |
| <b>159</b> | 6 | 1.434   | 75 |
| <b>160</b> | 6 | 6.356   | 75 |
| <b>161</b> | 6 | 12.96   | 75 |
| <b>162</b> | 6 | 1.443   | 75 |
| <b>163</b> | 6 | 1.061   | 75 |
| <b>164</b> | 6 | 0.8817  | 75 |
| <b>165</b> | 6 | 1.172   | 75 |
| <b>166</b> | 6 | 0.8817  | 75 |
| <b>167</b> | 6 | 1.156   | 75 |
| <b>168</b> | 6 | 6.696   | 75 |
| <b>169</b> | 6 | 0.04126 | 75 |
| <b>170</b> | 6 | 4.88    | 75 |
| <b>171</b> | 6 | 11.48   | 75 |
| <b>172</b> | 6 | 2.918   | 75 |
| <b>173</b> | 6 | 2.537   | 75 |
| <b>174</b> | 6 | 2.357   | 75 |
| <b>175</b> | 6 | 2.648   | 75 |
| <b>176</b> | 6 | 2.357   | 75 |
| <b>177</b> | 6 | 0.3198  | 75 |
| <b>178</b> | 6 | 6.737   | 75 |
| <b>179</b> | 6 | 1.816   | 75 |
| <b>180</b> | 6 | 4.788   | 75 |

|            |   |        |    |
|------------|---|--------|----|
|            |   |        |    |
|            |   |        |    |
|            |   |        |    |
| <b>181</b> | 6 | 9.614  | 75 |
| <b>182</b> | 6 | 9.233  | 75 |
| <b>183</b> | 6 | 9.053  | 75 |
| <b>184</b> | 6 | 9.343  | 75 |
| <b>185</b> | 6 | 9.053  | 75 |
| <b>186</b> | 6 | 7.016  | 75 |
| <b>187</b> | 6 | 4.922  | 75 |
| <b>188</b> | 6 | 11.53  | 75 |
| <b>189</b> | 6 | 2.877  | 75 |
| <b>190</b> | 6 | 2.495  | 75 |
| <b>191</b> | 6 | 2.316  | 75 |
| <b>192</b> | 6 | 2.606  | 75 |
| <b>193</b> | 6 | 2.316  | 75 |
| <b>194</b> | 6 | 0.2786 | 75 |
| <b>195</b> | 6 | 6.603  | 75 |
| <b>196</b> | 6 | 7.799  | 75 |
| <b>197</b> | 6 | 7.417  | 75 |
| <b>198</b> | 6 | 7.237  | 75 |
| <b>199</b> | 6 | 7.528  | 75 |
| <b>200</b> | 6 | 7.237  | 75 |
| <b>201</b> | 6 | 5.2    | 75 |
| <b>202</b> | 6 | 14.4   | 75 |
| <b>203</b> | 6 | 14.02  | 75 |
| <b>204</b> | 6 | 13.84  | 75 |
| <b>205</b> | 6 | 14.13  | 75 |
| <b>206</b> | 6 | 13.84  | 75 |
| <b>207</b> | 6 | 11.8   | 75 |
| <b>208</b> | 6 | 0.3817 | 75 |
| <b>209</b> | 6 | 0.5612 | 75 |
| <b>210</b> | 6 | 0.2708 | 75 |

| <b>211</b> | 6 | 0.5612 | 75 |
|------------|---|--------|----|
| <b>212</b> | 6 | 2.598  | 75 |
| <b>213</b> | 6 | 0.1796 | 75 |
| <b>214</b> | 6 | 0.1109 | 75 |
| <b>215</b> | 6 | 0.1796 | 75 |
| <b>216</b> | 6 | 2.217  | 75 |
| <b>217</b> | 6 | 0.2905 | 75 |
| <b>218</b> | 6 | 0      | 75 |
| <b>219</b> | 6 | 2.037  | 75 |
| <b>220</b> | 6 | 0.2905 | 75 |
| <b>221</b> | 6 | 2.328  | 75 |
| <b>222</b> | 6 | 2.037  | 75 |
