# Supplementary material for: RNA profiling identifies novel, photoperiod-history dependent markers associated with enhanced saltwater performance in juvenile Atlantic salmon
Source: PubMed Central journal article supplement (PMC7141700; doi:10.1371/journal.pone.0227496), 2020-04-08

# Supplemental Information 4

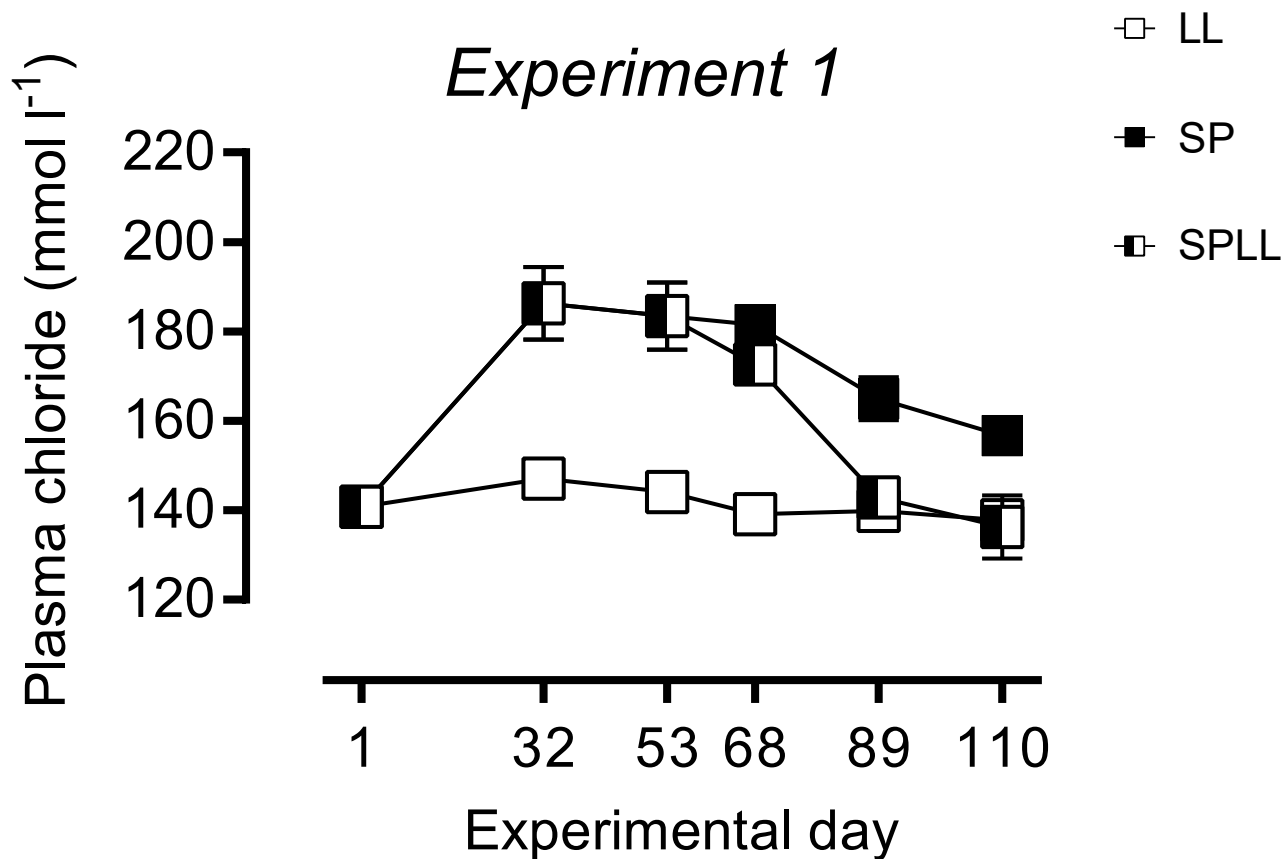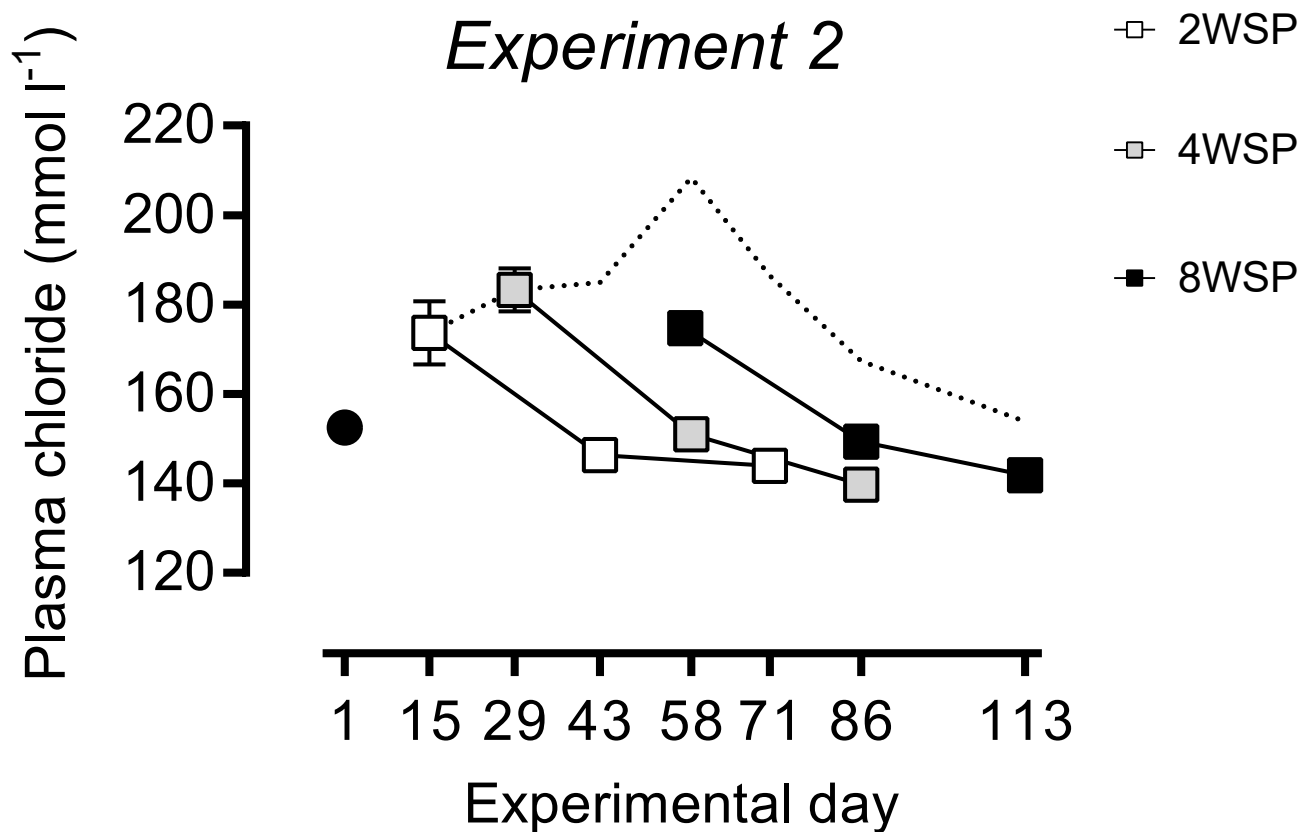

Supplement: pone.0227496.s010.pdf [file pone.0227496.s010.pdf]
